# Supplementary material for: Alterations in Oral–Nasal–Pharyngeal Microbiota and Salivary Proteins in Mouth-Breathing Children
Source: Front Microbiol. 2020 Oct 9;11:575550. doi: 10.3389/fmicb.2020.575550 (PMC7586306; doi:10.3389/fmicb.2020.575550)
Supplement: Supplementary file 2 [file Table_2.XLSX]

## Sheet: Proteins
Index	Majority protein	Accession	Majority protein group	Protein Des.	Protein Sequence	Gene name	Isoelectric Point	GRAVY	Peptide Number	Unique Peptide Number	Unique + razor Peptide Number	Peptides	Mod. Peptides	Unique + razor Peptides	Sequence coverage [%]	Mass [kDa]	Length	Q-value	Score	Found in samples	Deamidation (NQ) site positions	Oxidation (M) site positions	A1	A10	A3	A4	A5	A6	A7	A8	A9	B1	B10	B2	B3	B4	B5	B6	B7	B8	B9	A1/B1	A1/B1_DiffStat	A10/B10	A10/B10_DiffStat	A3/B3	A3/B3_DiffStat	A4/B4	A4/B4_DiffStat
6	sp|P27482|CALL3_HUMAN	P27482	sp|P27482|CALL3_HUMAN	Calmodulin-like protein 3 OS=Homo sapiens OX=9606 GN=CALML3 PE=1 SV=2	MADQLTEEQVTEFKEAFSLFDKDGDGCITTRELGTVMRSLGQNPTEAELRDMMSEIDRDGNGTVDFPEFLGMMARKMKDTDNEEEIREAFRVFDKDGNGFVSAAELRHVMTRLGEKLSDEEVDEMIRAADTDGDGQVNYEEFVRVLVSK	CALML3	4.3	-0.663758	10	9	10	AADTDGDGQVNYEEFVR;ADQLTEEQVTEFK;DMMSEIDRDGNGTVDFPEFLGMMAR;DTDNEEEIREAFR;EAFSLFDK;LGEKLSDEEVDEMIR;LSDEEVDEMIR;MKDTDNEEEIREAFR;SLGQNPTEAELR;VFDKDGNGFVSAAELR	(ac)ADQLTEEQVTEFK;DMMSEIDRDGN(de)GTVDFPEFLGMMAR;LGEKLSDEEVDEM(ox)IR;LSDEEVDEM(ox)IR;VFDKDGN(de)GFVSAAELR	AADTDGDGQVNYEEFVR;ADQLTEEQVTEFK;DMMSEIDRDGNGTVDFPEFLGMMAR;DTDNEEEIREAFR;EAFSLFDK;LGEKLSDEEVDEMIR;LSDEEVDEMIR;MKDTDNEEEIREAFR;SLGQNPTEAELR;VFDKDGNGFVSAAELR	81.2	16.891	149	0	323.31	A1;A10;A3;A4;A5;A6;A7;A8;A9;B1;B10;B2;B3;B4;B5;B6;B7;B8;B9	61;98	125	524800000	1227400000	1517900000	1004900000	1128600000	1083700000	614140000	2191100000	2041000000	868480000	281320000	1001000000	704680000	1234700000	453720000	1344600000	1041800000	448000000	876410000	0.604274	down	4.363	up	2.15403	up	0.813882	--
184	sp|Q96S96|PEBP4_HUMAN	Q96S96	sp|Q96S96|PEBP4_HUMAN	Phosphatidylethanolamine-binding protein 4 OS=Homo sapiens OX=9606 GN=PEBP4 PE=1 SV=3	MGWTMRLVTAALLLGLMMVVTGDEDENSPCAHEALLDEDTLFCQGLEVFYPELGNIGCKVVPDCNNYRQKITSWMEPIVKFPGAVDGATYILVMVDPDAPSRAEPRQRFWRHWLVTDIKGADLKKGKIQGQELSAYQAPSPPAHSGFHRYQFFVYLQEGKVISLLPKENKTRGSWKMDRFLNRFHLGEPEASTQFMTQNYQDSPTLQAPRERASEPKHKNQAEIAAC	PEBP4	6.08	-0.451101	4	4	4	FHLGEPEASTQFMTQNYQDSPTLQAPR;HWLVTDIK;IQGQELSAYQAPSPPAHSGFHR;ITSWMEPIVK		FHLGEPEASTQFMTQNYQDSPTLQAPR;HWLVTDIK;IQGQELSAYQAPSPPAHSGFHR;ITSWMEPIVK	29.5	25.733	227	0	46.661	A1;A3;A4;A5;A8;B1;B2;B3;B4;B6;B7			0	0	252140000	0	0	0	0	174530000	0	178310000	0	153120000	126260000	107440000	0	0	0	0	0	--	--	--	--	1.99699	up	--	--
191	sp|P30044|PRDX5_HUMAN	P30044	sp|P30044|PRDX5_HUMAN	Peroxiredoxin-5, mitochondrial OS=Homo sapiens OX=9606 GN=PRDX5 PE=1 SV=4	MGLAGVCALRRSAGYILVGGAGGQSAAAAARRYSEGEWASGGVRSFSRAAAAMAPIKVGDAIPAVEVFEGEPGNKVNLAELFKGKKGVLFGVPGAFTPGCSKTHLPGFVEQAEALKAKGVQVVACLSVNDAFVTGEWGRAHKAEGKVRLLADPTGAFGKETDLLLDDSLVSIFGNRRLKRFSMVVQDGIVKALNVEPDGTGLTCSLAPNIISQL	PRDX5	8.93	0.152336	5	5	5	FSMVVQDGIVK;LLADPTGAFGK;THLPGFVEQAEALK;VGDAIPAVEVFEGEPGNK;VNLAELFK		FSMVVQDGIVK;LLADPTGAFGK;THLPGFVEQAEALK;VGDAIPAVEVFEGEPGNK;VNLAELFK	29	22.086	214	0	14.182	A1;A4;A5;A6;A7;A8;A9;B1;B2;B3;B4;B5;B6;B7			253120000	0	0	439570000	359250000	0	0	629180000	464260000	207970000	0	170720000	287520000	269470000	192250000	200090000	524000000	0	0	1.2171	--	--	--	--	--	1.63124	up
203	sp|P48594|SPB4_HUMAN	P48594	sp|P48594|SPB4_HUMAN	Serpin B4 OS=Homo sapiens OX=9606 GN=SERPINB4 PE=1 SV=2	MNSLSEANTKFMFDLFQQFRKSKENNIFYSPISITSALGMVLLGAKDNTAQQISKVLHFDQVTENTTEKAATYHVDRSGNVHHQFQKLLTEFNKSTDAYELKIANKLFGEKTYQFLQEYLDAIKKFYQTSVESTDFANAPEESRKKINSWVESQTNEKIKNLFPDGTIGNDTTLVLVNAIYFKGQWENKFKKENTKEEKFWPNKNTYKSVQMMRQYNSFNFALLEDVQAKVLEIPYKGKDLSMIVLLPNEIDGLQKLEEKLTAEKLMEWTSLQNMRETCVDLHLPRFKMEESYDLKDTLRTMGMVNIFNGDADLSGMTWSHGLSVSKVLHKAFVEVTEEGVEAAAATAVVVVELSSPSTNEEFCCNHPFLFFIRQNKTNSILFYGRFSSP	SERPINB4	5.86	-0.459744	13	3	3	FKMEESYDLKDTLR;FYQTSVESTDFANAPEESR;INSWVESQTNEK;INSWVESQTNEKIK;KINSWVESQTNEK;KKINSWVESQTNEK;LLTEFNK;LMEWTSLQNMR;MNSLSEANTK;TNSILFYGR;VLEIPYK;VLEIPYKGK;VLHFDQVTENTTEK	IN(de)SWVESQTNEK;KKIN(de)SWVESQTNEK;LMEWTSLQN(de)MR;(ac)M(ox)N(de)SLSEANTK;(ac)MNSLSEANTK;TN(de)SILFYGR	FKMEESYDLKDTLR;FYQTSVESTDFANAPEESR;VLHFDQVTENTTEK	27.9	44.853	390	0	57.145	A1;A3;A4;A5;A6;A7;A8;A9;B2;B3;B4;B5;B6;B7;B8;B9	2;148;274;379	1	0	0	103540000	0	0	0	57849000	87589000	0	0	0	0	0	0	0	206860000	107000000	0	246520000	--	--	--	--	--	--	--	--
281	sp|Q9BRK5|CAB45_HUMAN	Q9BRK5	sp|Q9BRK5|CAB45_HUMAN	45 kDa calcium-binding protein OS=Homo sapiens OX=9606 GN=SDF4 PE=1 SV=1	MVWPWVAMASRWGPLIGLAPCCLWLLGAVLLMDASARPANHSSTRERVANREENEILPPDHLNGVKLEMDGHLNRGFHQEVFLGKDLGGFDEDAEPRRSRRKLMVIFSKVDVNTDRKISAKEMQRWIMEKTAEHFQEAMEESKTHFRAVDPDGDGHVSWDEYKVKFLASKGHSEKEVADAIRLNEELKVDEETQEVLENLKDRWYQADSPPADLLLTEEEFLSFLHPEHSRGMLRFMVKEIVRDLDQDGDKQLSVPEFISLPVGTVENQQGQDIDDNWVKDRKKEFEELIDSNHDGIVTAEELESYMDPMNEYNALNEAKQMIAVADENQNHHLEPEEVLKYSEFFTGSKLVDYARSVHEEF	SDF4	4.76	-0.671547	7	7	7	AVDPDGDGHVSWDEYK;AVDPDGDGHVSWDEYKVK;DLGGFDEDAEPR;EIVRDLDQDGDK;GFHQEVFLGK;GHSEKEVADAIR;TAEHFQEAMEESK		AVDPDGDGHVSWDEYK;AVDPDGDGHVSWDEYKVK;DLGGFDEDAEPR;EIVRDLDQDGDK;GFHQEVFLGK;GHSEKEVADAIR;TAEHFQEAMEESK	21.3	41.806	362	0	26.658	A1;A3;A4;A5;A6;A8;B1;B10;B7;B8;B9			75219000	0	131850000	169510000	51717000	0	0	85174000	0	237430000	90554000	0	0	0	0	0	246420000	141660000	109200000	0.316805	down	--	--	--	--	--	--
323	sp|Q05315|LEG10_HUMAN	Q05315	sp|Q05315|LEG10_HUMAN	Galectin-10 OS=Homo sapiens OX=9606 GN=CLC PE=1 SV=3	MSLLPVPYTEAASLSTGSTVTIKGRPLACFLNEPYLQVDFHTEMKEESDIVFHFQVCFGRRVVMNSREYGAWKQQVESKNMPFQDGQEFELSISVLPDKYQVMVNGQSSYTFDHRIKPEAVKMVQVWRDISLTKFNVSYLKR	CLC	6.83	-0.321127	4	4	4	EYGAWKQQVESK;FNVSYLK;FNVSYLKR;MVQVWR		EYGAWKQQVESK;FNVSYLK;FNVSYLKR;MVQVWR	18.3	16.453	142	0	26.864	A1;A10;A3;A4;A5;A6;A7;A8;A9;B1;B10;B2;B3;B6;B7;B8;B9			0	180240000	416480000	0	0	472380000	344310000	244530000	0	0	0	0	0	0	0	215810000	171530000	0	236270000	--	--	--	--	--	--	--	--
357	sp|P11215|ITAM_HUMAN	P11215	sp|P11215|ITAM_HUMAN	Integrin alpha-M OS=Homo sapiens OX=9606 GN=ITGAM PE=1 SV=2	MALRVLLLTALTLCHGFNLDTENAMTFQENARGFGQSVVQLQGSRVVVGAPQEIVAANQRGSLYQCDYSTGSCEPIRLQVPVEAVNMSLGLSLAATTSPPQLLACGPTVHQTCSENTYVKGLCFLFGSNLRQQPQKFPEALRGCPQEDSDIAFLIDGSGSIIPHDFRRMKEFVSTVMEQLKKSKTLFSLMQYSEEFRIHFTFKEFQNNPNPRSLVKPITQLLGRTHTATGIRKVVRELFNITNGARKNAFKILVVITDGEKFGDPLGYEDVIPEADREGVIRYVIGVGDAFRSEKSRQELNTIASKPPRDHVFQVNNFEALKTIQNQLREKIFAIEGTQTGSSSSFEHEMSQEGFSAAITSNGPLLSTVGSYDWAGGVFLYTSKEKSTFINMTRVDSDM…	ITGAM	6.88	-0.18724	13	13	13	AIMEFNPR;DHVFQVNNFEALK;EGQIQSVVTYDLALDSGRPHSR;ERLPSHSDFLAELR;FGDPLGYEDVIPEADREGVIR;GAVYLFHGTSGSGISPSHSQR;LFTALFPFEK;QQPQKFPEALR;SLVKPITQLLGR;VMQHQYQVSNLGQR;VQSLVLGAPR;VVVGAPQEIVAANQR;YVIGVGDAFR	(gl)QQPQKFPEALR	AIMEFNPR;DHVFQVNNFEALK;EGQIQSVVTYDLALDSGRPHSR;ERLPSHSDFLAELR;FGDPLGYEDVIPEADREGVIR;GAVYLFHGTSGSGISPSHSQR;LFTALFPFEK;QQPQKFPEALR;SLVKPITQLLGR;VMQHQYQVSNLGQR;VQSLVLGAPR;VVVGAPQEIVAANQR;YVIGVGDAFR	15.7	127.18	1152	0	97.044	A1;A10;A4;A5;A6;A7;A8;A9;B3;B4;B5;B6;B7;B9			208460000	0	0	196700000	162190000	0	199550000	0	0	0	0	0	315720000	0	0	261700000	0	0	0	--	--	--	--	--	--	--	--
367	sp|P25786|PSA1_HUMAN	P25786	sp|P25786|PSA1_HUMAN	Proteasome subunit alpha type-1 OS=Homo sapiens OX=9606 GN=PSMA1 PE=1 SV=1	MFRNQYDNDVTVWSPQGRIHQIEYAMEAVKQGSATVGLKSKTHAVLVALKRAQSELAAHQKKILHVDNHIGISIAGLTADARLLCNFMRQECLDSRFVFDRPLPVSRLVSLIGSKTQIPTQRYGRRPYGVGLLIAGYDDMGPHIFQTCPSANYFDCRAMSIGARSQSARTYLERHMSEFMECNLNELVKHGLRALRETLPAEQDLTTKNVSIGIVGKDLEFTIYDDDDVSPFLEGLEERPQRKAQPAQPADEPAEKADEPMEH	PSMA1	6.15	-0.43308	4	4	4	AQPAQPADEPAEKADEPMEH;FVFDRPLPVSR;KAQPAQPADEPAEKADEPMEH;LVSLIGSK	AQPAQPADEPAEKADEPM(ox)EH	AQPAQPADEPAEKADEPMEH;FVFDRPLPVSR;KAQPAQPADEPAEKADEPMEH;LVSLIGSK	15.2	29.555	263	0	19.786	A10;A3;A4;A5;A6;A7;A8;A9;B10;B3;B4;B6;B7;B9		261	0	0	0	0	41615000	18290000	40103000	33787000	24765000	0	29940000	0	50456000	46455000	0	100080000	73897000	0	65077000	--	--	--	--	--	--	--	--
423	sp|Q04760|LGUL_HUMAN	Q04760	sp|Q04760|LGUL_HUMAN	Lactoylglutathione lyase OS=Homo sapiens OX=9606 GN=GLO1 PE=1 SV=4	MAEPQPPSGGLTDEAALSCCSDADPSTKDFLLQQTMLRVKDPKKSLDFYTRVLGMTLIQKCDFPIMKFSLYFLAYEDKNDIPKEKDEKIAWALSRKATLELTHNWGTEDDETQSYHNGNSDPRGFGHIGIAVPDVYSACKRFEELGVKFVKKPDDGKMKGLAFIQDPDGYWIEILNPNKMATLM	GLO1	5.12	-0.515761	3	3	3	IAWALSR;SLDFYTR;VLGMTLIQK		IAWALSR;SLDFYTR;VLGMTLIQK	12.5	20.777	184	0.0017123	4.2537	A3;A4;A5;A6;A8;A9;B1;B2;B3;B4;B6;B7;B8;B9			0	0	0	0	0	0	0	98433000	142310000	0	0	58343000	56288000	79822000	0	0	0	0	42024000	--	--	--	--	--	--	--	--
627	sp|Q14974|IMB1_HUMAN	Q14974	sp|Q14974|IMB1_HUMAN	Importin subunit beta-1 OS=Homo sapiens OX=9606 GN=KPNB1 PE=1 SV=2	MELITILEKTVSPDRLELEAAQKFLERAAVENLPTFLVELSRVLANPGNSQVARVAAGLQIKNSLTSKDPDIKAQYQQRWLAIDANARREVKNYVLQTLGTETYRPSSASQCVAGIACAEIPVNQWPELIPQLVANVTNPNSTEHMKESTLEAIGYICQDIDPEQLQDKSNEILTAIIQGMRKEEPSNNVKLAATNALLNSLEFTKANFDKESERHFIMQVVCEATQCPDTRVRVAALQNLVKIMSLYYQYMETYMGPALFAITIEAMKSDIDEVALQGIEFWSNVCDEEMDLAIEASEAAEQGRPPEHTSKFYAKGALQYLVPILTQTLTKQDENDDDDDWNPCKAAGVCLMLLATCCEDDIVPHVLPFIKEHIKNPDWRYRDAAVMAFGCILEGPEP…	KPNB1	4.68	-0.0916667	3	3	3	LLETTDRPDGHQNNLR;MELITILEK;VLANPGNSQVAR	(ac)MELITILEK;VLANPGN(de)SQVAR	LLETTDRPDGHQNNLR;MELITILEK;VLANPGNSQVAR	4.2	97.169	876	0	14.171	A10;A3;A5;A6;A7;A8;A9;B10;B6;B7;B9	49		0	0	0	0	0	0	0	17411000	8792000	0	0	0	0	0	0	24653000	21173000	0	43974000	--	--	--	--	--	--	--	--
[truncated: 17 more columns]

## Sheet: Peptides
Index	Peptide Sequence	Mod. Peptides	Missed cleavages	Mass	Charges	Amino acid before	Amino acid after	Length	Proteins	Start position	End position	Unique or not	PEP	Score	MS/MS Count	dmass[ppm]	Found in samples	A1	A10	A3	A4	A5	A6	A7	A8	A9	B1	B10	B2	B3	B4	B5	B6	B7	B8	B9	A1/B1	A10/B10	A3/B3	A4/B4	A5/B5	A6/B6	A7/B7	A8/B8	A9/B9	A	A_CV	B	B_CV
1	AHFSISNSAEDPFIAIHAESK	AHFSISN(de)SAEDPFIAIHAESK	0	2270.1	2;3;4;5	K	L	21	sp|P04745|AMY1_HUMAN;sp|P19961|AMY2B_HUMAN;sp|P04746|AMYP_HUMAN	490	510	no	0	412.12	574	-2.8683	A1;A10;A3;A4;A5;A6;A7;A8;A9;B1;B10;B2;B3;B4;B5;B6;B7;B8;B9	15363000000	1963600000	2182300000	19374000000	14091000000	3743900000	2335400000	2618300000	3528900000	18011000000	1375400000	16153000000	4497900000	17106000000	11455000	476160000	1323000000	366330000	1607600000	0.852979	1.42766	0.485182	1.13259	1230.12	7.86269	1.76523	7.14738	2.19514	7.24449e+09	0.9576	6092784500	1.2637
2	VDATEESDLAQQYGVR		0	1779.83	2;3	K	G	16	sp|P07237|PDIA1_HUMAN	82	97	yes	0	373.51	25	-0.72391	A1;A10;A4;A5;A8;A9;B1;B2;B3;B4;B7;B8	103030000	0	0	116620000	191800000	0	0	0	0	70921000	0	47184000	95336000	120400000	0	0	0	0	0	1.45274	--	--	0.968605	--	--	--	--	--	137150000	0.3486	83460250	0.3776
3	HVEDVPAFQALGSLNDLQFFR	HVEDVPAFQ(de)ALGSLN(de)DLQFFR;HVEDVPAFQALGSLN(de)DLQFFR	0	2402.2	2;3;4	K	Y	21	sp|P25311|ZA2G_HUMAN	40	60	yes	0	445.13	98	-1.7063	A1;A10;A3;A4;A5;A6;A7;A8;A9;B1;B10;B2;B3;B4;B5;B6;B7;B9	2832000000	732130000	4351900000	1870300000	5568100000	4632300000	1712800000	1139900000	5095400000	1310400000	3565900000	7243600000	3597400000	1914700000	8044300	5679200000	3875600000	0	337410000	2.16117	0.205314	1.20973	0.976811	692.18	0.815661	0.441944	--	15.1015	3103870000	0.5913	3.05914e+09	0.7896
4	QHDQLEAQKLEYHQVIQQMEQK	(gl)QHDQLEAQKLEYHQVIQQMEQK;(gl)QHDQLEAQKLEYHQVIQQM(ox)EQK;QHDQLEAQKLEYHQVIQQM(ox)EQK	1	2750.34	3;4;5	R	K	22	sp|P80303|NUCB2_HUMAN	378	399	yes	0	380.52	44	-1.4438	A1;A10;A3;A4;A5;A6;A7;A8;B1;B10;B7;B8;B9	79260000	562940000	54626000	103690000	24798000	98946000	276430000	393510000	0	62601000	683500000	0	0	0	0	0	3240600000	490900000	339750000	1.26611	0.823614	--	--	--	--	0.0853021	0.801609	--	199275000	0.9688	963470200	1.342
5	QVEGMEDWKQDSQLQK	QVEGM(ox)EDWKQDSQLQK;(gl)QVEGM(ox)EDWKQDSQLQK;(gl)QVEGMEDWKQDSQLQK;Q(de)VEGMEDWKQDSQLQK	1	1947.9	2;3	R	A	16	sp|P25311|ZA2G_HUMAN	76	91	yes	0	422.44	665	-4.4408	A1;A10;A3;A4;A5;A6;A7;A8;A9;B1;B10;B2;B3;B4;B5;B6;B7;B8;B9	1803500000	12122000000	15774000000	1876900000	2033900000	13172000000	8209700000	11567000000	17916000000	1865400000	12961000000	2516200000	2096900000	2280600000	17776000	24625000000	18433000000	6144300000	8528900000	0.966817	0.935267	7.52253	0.822985	114.418	0.534904	0.445381	1.88256	2.10062	9.38611e+09	0.6626	7946907600	1.0381
6	LHTEAQIQEEGTVVELTGR		0	2109.07	2;3	K	Q	19	sp|P01023|A2MG_HUMAN	320	338	yes	0	416.25	92	-0.47272	A1;A10;A3;A4;A5;A6;A7;A8;A9;B1;B10;B2;B3;B4;B5;B6;B7;B8;B9	161530000	426190000	385960000	63613000	136430000	929300000	1125300000	247570000	728060000	23376000	776000000	276530000	235360000	205860000	1501600	1142900000	112930000	802250000	1470300000	6.91008	0.549214	1.63987	0.309011	90.8564	0.813107	9.96458	0.308595	0.495178	4.67106e+08	0.8071	504700760	1.0133
7	EGKQVGSGVTTDQVQAEAK		1	1930.96	2;3	R	E	19	sp|P01871|IGHM_HUMAN;sp|P0DOX6|IGM_HUMAN	151	169	no	0	469.79	101	-1.6678	A10;A3;A6;A7;A8;A9;B10;B6;B7;B8;B9	0	476090000	1164200000	0	0	13940000	2072400000	601520000	768950000	0	1070700000	0	0	0	0	670310000	2285900000	384190000	540840000	--	0.444653	--	--	--	0.0207963	0.906601	1.56568	1.42177	8.49517e+08	0.8324	990388000	0.775
8	VVSVLTVVHQDWLNGKEYK	VVSVLTVVHQDWLN(de)GKEYK	1	2213.18	2;3;4	R	C	19	sp|P01859|IGHG2_HUMAN	181	199	yes	0	389.9	102	-0.71131	A1;A10;A3;A4;A5;A6;A7;A8;A9;B1;B10;B2;B3;B4;B6;B7;B8;B9	658080000	794050000	864810000	280390000	1536900000	3952700000	5628900000	2098400000	5487600000	102720000	3867000000	742900000	4022700000	882270000	0	4125800000	675410000	1147800000	1000200000	6.40654	0.20534	0.214982	0.317805	--	0.958045	8.33405	1.82819	5.4865	2366870000	0.892	1.84076e+09	0.8963
9	YFENGKDVNDWVGPPNDNGVTK	YFEN(de)GKDVN(de)DWVGPPNDN(de)GVTK;YFEN(de)GKDVNDWVGPPNDN(de)GVTK;YFEN(de)GKDVN(de)DWVGPPN(de)DN(de)GVTK;YFENGKDVNDWVGPPNDN(de)GVTK	1	2464.13	2;3;4	R	E	22	sp|P04745|AMY1_HUMAN	362	383	yes	0	381.53	1097	-3.9409	A1;A10;A3;A4;A5;A6;A7;A8;A9;B1;B10;B2;B3;B4;B5;B6;B7;B8;B9	27613000000	54885000000	35054000000	30613000000	29352000000	37109000000	39197000000	60295000000	44853000000	39985000000	29336000000	33152000000	9221600000	36793000000	43379000	14507000000	41164000000	12255000000	29761000000	0.690584	1.87091	3.80129	0.832033	676.641	2.55801	0.952216	4.92003	1.50711	3.98857e+10	0.2866	24621797900	0.5863
10	VTTVASHTSDSDVPSGVTEVVVK		0	2313.17	2;3;4	R	L	23	sp|P10909|CLUS_HUMAN	386	408	yes	0	399.17	107	-1.1148	A1;A10;A3;A4;A5;A6;A7;A8;A9;B1;B10;B2;B3;B4;B5;B6;B7;B8;B9	115560000	209100000	1874100000	75169000	436470000	1812000000	732630000	641000000	694840000	197090000	1027700000	66235000	263100000	854980000	533880	785850000	1354800000	226780000	776050000	0.586331	0.203464	7.12315	0.087919	817.543	2.30578	0.540766	2.82653	0.895355	7.32319e+08	0.9227	555311888	0.8323
11	VDNALQSGNSQESVTEQDSKDSTYSLSSTLTLSK	VDNALQSGNSQESVTEQ(de)DSKDSTYSLSSTLTLSK;VDNALQ(de)SGNSQESVTEQ(de)DSKDSTYSLSSTLTLSK;VDNALQSGN(de)SQ(de)ESVTEQ(de)DSKDSTYSLSSTLTLSK	1	3618.7	2;3;4	K	A	34	sp|P01834|IGKC_HUMAN;sp|P0DOX7|IGK_HUMAN	150	183	no	0	485.19	584	-4.249	A1;A10;A3;A4;A5;A6;A7;A8;A9;B1;B10;B2;B3;B4;B5;B6;B7;B8;B9	2858500000	5141800000	1237000000	2768900000	3815000000	6563600000	5177700000	5884300000	2131500000	2815100000	5641700000	2684000000	5158300000	4519600000	4386200	1261300000	6328500000	1865000000	2352400000	1.01542	0.911392	0.239808	0.612643	869.773	5.20384	0.818156	3.15512	0.906096	3.95314e+09	0.4628	3263028620	0.6311
12	LHNLNSNWFPEGSKPFIYQEVIDLGGEPIK	LHNLN(de)SNWFPEGSKPFIYQEVIDLGGEPIK	1	3440.74	2;3;4;5	K	S	30	sp|P04745|AMY1_HUMAN	229	258	yes	5.3147e-303	401.03	172	-3.919	A1;A3;A4;A5;A6;A9;B1;B2;B3;B4;B5;B6	30570000000	0	46948000	52622000000	15705000000	884860000	0	0	1010600000	46818000000	0	23462000000	5257200000	42035000000	87136000	124400000	0	0	0	0.652954	--	0.00893023	1.25186	180.235	7.11302	--	--	--	16806568000	1.2642	1.96306e+10	1.0746
13	QGHFYGETAAVYVAVEER	(gl)QGHFYGETAAVYVAVEER	0	2024.96	2;3;4	K	K	18	sp|P01833|PIGR_HUMAN	548	565	yes	1.134e-299	380.38	1549	-3.5537	A1;A10;A3;A4;A5;A6;A7;A8;A9;B1;B10;B2;B3;B4;B5;B6;B7;B8;B9	1672900000	1950400000	3453800000	2062300000	2113700000	2904500000	1603500000	2824700000	2833800000	2013000000	2098700000	2365300000	1753300000	2213000000	77831000	1399400000	2652100000	252530000	663760000	0.831048	0.929337	1.96989	0.931902	27.1576	2.07553	0.604615	11.1856	4.26931	2.37996e+09	0.2695	1548892100	0.5907
14	EFPEMNLESVTPMTLTTLEGGNLEAK	EFPEM(ox)NLESVTPMTLTTLEGGNLEAK;EFPEM(ox)NLESVTPM(ox)TLTTLEGGNLEAK	0	2850.37	2;3	R	V	26	sp|P31025|LCN1_HUMAN	45	70	yes	4.9442e-292	369.65	48	-1.7834	A1;A4;A5;A6;A7;A8;A9;B1;B2;B3;B4;B6;B7	516810000	0	0	1138300000	442040000	706860000	323690000	86562000	51002000	695440000	0	2179400000	1009300000	544930000	0	76420000	64399000	0	0	0.743141	--	--	2.08889	--	9.24967	5.02632	--	--	4.66466e+08	0.8067	7.61648e+08	1.0302
15	AHFSISNSAEDPFIAIHAESKL	AHFSISN(de)SAEDPFIAIHAESKL	1	2383.18	2;3;4	K	-	22	sp|P04745|AMY1_HUMAN;sp|P19961|AMY2B_HUMAN;sp|P04746|AMYP_HUMAN	490	511	no	5.1787e-283	429.23	1139	-4.0821	A1;A10;A3;A4;A5;A6;A7;A8;A9;B1;B10;B2;B3;B4;B5;B6;B7;B8;B9	14794000000	4363800000	14352000000	17190000000	12789000000	18522000000	10433000000	14928000000	17866000000	18885000000	8301000000	15162000000	4980500000	19343000000	47617000	4340700000	13452000000	18501000	4222800000	0.783373	0.525696	2.88164	0.888694	268.581	4.26705	0.775572	806.875	4.23084	1.39153e+10	0.3155	8875311800	0.8265
16	VDNALQSGNSQESVTEQDSK	VDNALQSGN(de)SQESVTEQDSK;VDN(de)ALQSGN(de)SQESVTEQDSK	0	2134.96	2;3	K	D	20	sp|P01834|IGKC_HUMAN;sp|P0DOX7|IGK_HUMAN	150	169	no	8.8518e-275	367.11	597	-1.8603	A1;A10;A3;A4;A5;A6;A7;A8;A9;B1;B10;B2;B3;B4;B5;B6;B7;B8;B9	6816100000	1252600000	5676800000	5136100000	5261100000	3913000000	3405300000	1724600000	8902200000	2329400000	3370600000	1543000000	2303000000	10006000000	96115000	4545900000	1725900000	995100000	722660000	2.92612	0.371625	2.46496	0.513302	54.7376	0.860776	1.97306	1.73309	12.3187	4.67642e+09	0.5162	2763767500	1.0331
17	YSGSEGSTQTLTKGELK		1	1784.88	2;3	R	V	17	sp|P25815|S100P_HUMAN	18	34	yes	1.1357e-267	366.29	60	-1.1737	A10;A3;A6;A7;A8;A9;B10;B6;B7;B8;B9	0	223640000	159230000	0	0	242710000	335040000	278410000	1096200000	0	389780000	0	0	0	0	2493800000	398580000	85228000	147750000	--	0.57376	--	--	--	0.0973254	0.840584	3.26665	7.41929	389205000	0.9024	703027600	1.4379
18	VPLQQNFQDNQFQGK	VPLQQN(de)FQDNQFQGK	0	1789.87	2;3	K	W	15	sp|P80188|NGAL_HUMAN	36	50	yes	3.329e-264	375.57	223	-3.6948	A1;A10;A3;A4;A5;A6;A7;A8;A9;B1;B10;B2;B3;B4;B5;B6;B7;B8;B9	636540000	661200000	938380000	381260000	658250000	1595400000	438080000	415480000	3216700000	152950000	827660000	695170000	944010000	967180000	10192000	1490000000	296170000	149350000	209690000	4.16175	0.798879	0.994036	0.394198	64.585	1.07074	1.47915	2.78192	15.3403	9.93477e+08	0.9195	574237200	0.8402
19	HVGTEGSMATVGLSQQLFDSALLLLQK	HVGTEGSM(ox)ATVGLSQQLFDSALLLLQK	0	2842.49	2;3;4	R	A	27	sp|Q8N4F0|BPIB2_HUMAN	247	273	yes	7.359e-263	447.84	56	-1.7074	A1;A3;A4;A5;A6;A7;A9;B1;B10;B2;B3;B4;B6;B7	119510000	0	1545500000	804020000	1044900000	612830000	88472000	0	1267900000	962500000	63327000	1380000000	666230000	1335600000	0	1017800000	146690000	0	0	0.124166	--	2.31977	0.601992	--	0.602112	0.603122	--	--	7.83305e+08	0.7064	796021000	0.6656
20	MEWNKEAAANAQK	MEWN(de)KEAAANAQK;MEWN(de)KEAAAN(de)AQK;M(ox)EWNKEAAANAQK;M(ox)EWN(de)KEAAANAQK	1	1489.7	2;3	K	W	13	sp|P54108|CRIS3_HUMAN	63	75	yes	6.0621e-259	363.43	294	-3.1612	A1;A10;A3;A4;A5;A6;A7;A8;A9;B1;B10;B2;B3;B4;B5;B6;B7;B8;B9	87818000	1057300000	1088000000	183420000	64335000	213070000	405680000	624510000	400750000	117310000	1191400000	160830000	171910000	198760000	1307900	1332300000	3019200000	2230600000	528260000	0.748598	0.887443	6.32889	0.922821	49.1895	0.159926	0.134367	0.279974	0.758623	4.5832e+08	0.8511	895187790	1.1573
21	KDLYANTVLSGGTTMYPGIADR	KDLYANTVLSGGTTM(ox)YPGIADR;KDLYAN(de)TVLSGGTTMYPGIADR;KDLYAN(de)TVLSGGTTM(ox)YPGIADR	1	2342.16	2;3	R	M	22	sp|P63261|ACTG_HUMAN;sp|P60709|ACTB_HUMAN	291	312	yes	1.9499e-252	429.27	119	-3.7291	A1;A3;A4;A5;A6;A7;A8;A9;B1;B10;B2;B3;B4;B5;B6;B8;B9	624150000	0	145990000	837980000	1444600000	308350000	193970000	1256200000	5129200000	450800000	397940000	621160000	1899700000	1196500000	1050800	1341800000	0	169250000	591340000	1.38454	--	0.076849	0.700359	1374.76	0.229803	--	7.42216	8.67386	1242555000	1.3213	7.4106e+08	0.8297
22	IFIHSLDVNVIQQVVDNPQHK	IFIHSLDVN(de)VIQQVVDNPQHK	0	2442.3	2;3;4	R	T	21	sp|Q96DR5|BPIA2_HUMAN	222	242	yes	1.9316e-245	458.31	58	-1.6408	A1;A3;A4;A5;A8;A9;B1;B10;B2;B3;B4;B5;B7	4880800000	0	1046400000	4291200000	3921900000	0	0	104350000	2478000000	7764100000	63088000	1541600000	1794100000	2631000000	12140000	0	157580000	0	0	0.628637	--	0.583245	1.63101	323.056	--	--	--	--	2.78711e+09	0.6856	1.9948e+09	1.3725
23	QSNNKYAASSYLSLTPEQWK	QSN(de)NKYAASSYLSLTPEQWK;(gl)QSNNKYAASSYLSLTPEQWK;Q(de)SNN(de)KYAASSYLSLTPEQWK	1	2314.12	2;3	K	S	20	sp|P0DOY2|IGLC2_HUMAN;sp|P0DOY3|IGLC3_HUMAN;sp|P0CF74|IGLC6_HUMAN;sp|A0M8Q6|IGLC7_HUMAN;sp|B9A064|IGLL5_HUMAN;sp|P0DOX8|IGL1_HUMAN;sp|P0CG04|IGLC1_HUMAN	61	80	no	2.3153e-245	349.54	149	-4.2221	A1;A10;A3;A4;A5;A6;A7;A8;A9;B1;B10;B2;B3;B4;B6;B7;B8;B9	354580000	1731200000	1457000000	404980000	612810000	1484400000	1167000000	1100800000	1628400000	206510000	954520000	266460000	987830000	1062900000	0	1938000000	1031100000	136490000	392010000	1.71701	1.81369	1.47495	0.381014	--	0.765944	1.1318	8.06506	4.15398	1.10457e+09	0.4783	7.75091e+08	0.7516
24	TGSGDIENYNDATQVR	TGSGDIEN(de)YN(de)DATQVR;TGSGDIEN(de)YNDATQVR	0	1738.78	1;2;3	K	D	16	sp|P04745|AMY1_HUMAN;sp|P19961|AMY2B_HUMAN;sp|P04746|AMYP_HUMAN	158	173	no	1.4509e-234	360.04	1333	-4.4603	A1;A10;A3;A4;A5;A6;A7;A8;A9;B1;B10;B2;B3;B4;B5;B6;B7;B8;B9	24651000000	46822000000	38986000000	19973000000	13285000000	42522000000	59519000000	42972000000	65096000000	18332000000	35029000000	11708000000	3447200000	27262000000	1137200000	29296000000	55220000000	21849000000	45598000000	1.3447	1.33666	11.3095	0.732632	11.6822	1.45146	1.07785	1.96677	1.42761	39314000000	0.4424	24887840000	0.6994
25	VFSNGADLSGVTEEAPLKLSK	VFSN(de)GADLSGVTEEAPLKLSK	1	2161.13	2;3	K	A	21	sp|P01009|A1AT_HUMAN	335	355	yes	1.6813e-217	346.42	40	-0.90634	A10;A3;A6;A7;A8;A9;B10;B3;B6;B7;B8;B9	0	1394500000	574800000	0	0	1528200000	2089400000	1766400000	214230000	0	1926400000	0	24172000	0	0	3361600000	869900000	3284800000	4770600000	--	0.723889	23.7796	--	--	0.454605	2.40189	0.53775	0.0449063	1261255000	0.5715	2372912000	0.7428
26	EVDLKDYEDQQKQLEQVIAK		2	2418.23	3;4	R	D	20	sp|P02671|FIBA_HUMAN	191	210	yes	2.931e-217	298.76	15	-0.67541	A10;A3;A6;A7;A8;B10;B6;B7;B8;B9	0	86940000	84037000	0	0	170380000	316610000	243120000	0	0	573040000	0	0	0	0	378570000	172220000	325340000	667030000	--	0.151717	--	--	--	0.450062	1.8384	0.74728	--	180217400	0.5591	423240000	0.4673
27	LGALGGNTQEVTLQPGEYITK	LGALGGN(de)TQEVTLQPGEYITK;LGALGGN(de)TQ(de)EVTLQPGEYITK	0	2188.14	2;3	K	V	21	sp|Q96DA0|ZG16B_HUMAN	101	121	yes	3.6608e-217	343.62	200	-3.1526	A1;A10;A3;A4;A5;A6;A7;A8;A9;B1;B10;B2;B3;B4;B5;B6;B7;B8;B9	4245100000	163230000	4838300000	8735100000	4840900000	1698800000	588200000	798400000	728070000	11270000000	1785000000	4748000000	3895500000	4669300000	8531400	287310000	748730000	121310000	126750000	0.376673	0.0914454	1.24202	1.87075	567.422	5.91278	0.785597	6.58149	5.74414	2.95957e+09	0.9761	2766043140	1.286
28	VVSVLTVLHQDWLNGKEYK	VVSVLTVLHQDWLN(de)GKEYK	1	2227.2	2;3;4	R	C	19	sp|P01860|IGHG3_HUMAN;sp|P01861|IGHG4_HUMAN;sp|P0DOX5|IGG1_HUMAN;sp|P01857|IGHG1_HUMAN	304	322	no	9.1132e-217	346.57	82	-2.1625	A1;A10;A3;A4;A5;A6;A7;A8;A9;B1;B10;B2;B3;B4;B6;B7;B8;B9	3393700000	99626000	436520000	1042200000	2192300000	3207400000	2750800000	779090000	2039300000	365110000	2808700000	781610000	3335000000	2741100000	0	2867500000	789160000	10123000	636550000	9.29501	0.0354705	0.130891	0.380212	--	1.11854	3.48573	76.9624	3.20368	1.77122e+09	0.6913	1.59276e+09	0.8212
29	AADTDGDGQVNYEEFVR		0	1884.81	2	R	V	17	sp|P27482|CALL3_HUMAN	128	144	yes	1.1392e-210	339.3	31	-0.82847	A1;A10;A3;A4;A5;A6;A7;A8;A9;B1;B2;B3;B4;B6;B7;B8;B9	30574000	169680000	187420000	61754000	99477000	185950000	87210000	363670000	440420000	47932000	0	60993000	55684000	92931000	0	333550000	234850000	40159000	179380000	0.637862	--	3.36578	0.664515	--	0.557488	0.371343	9.05575	2.45523	1.80684e+08	0.7658	130684875	0.8248
30	ATAGDTHLGGEDFDNR		0	1674.72	2;3	K	L	16	sp|P0DMV9|HS71B_HUMAN;sp|P0DMV8|HS71A_HUMAN;sp|P17066|HSP76_HUMAN;sp|P48741|HSP77_HUMAN	221	236	no	1.3266e-207	346.18	79	-0.53789	A1;A10;A3;A4;A5;A6;A7;A8;A9;B1;B10;B2;B3;B4;B5;B6;B7;B8;B9	227860000	206950000	615640000	149360000	221790000	578520000	405210000	453330000	2161200000	51332000	416750000	150640000	226020000	267980000	9759000	1774500000	446890000	48279000	281630000	4.43895	0.496581	2.72383	0.557355	22.7267	0.326019	0.906733	9.3898	7.6739	5.57762e+08	1.1198	367378000	1.4064
31	EQINALTSFLDASFVYSSEPSLASR		0	2731.33	2;3	R	L	25	sp|P22079|PERL_HUMAN	295	319	yes	5.8616e-206	422.15	25	-2.6231	A1;A3;A4;A5;A6;A9;B1;B10;B2;B3;B4;B6;B7	97819000	0	200780000	426440000	303530000	34649000	0	0	193840000	208470000	54644000	201900000	196960000	282800000	0	246210000	91497000	0	0	0.469223	--	1.01939	1.50792	--	0.140729	--	--	--	2.0951e+08	0.6725	1.83212e+08	0.4457
32	NADLQVLKPEPELVYEDLR	N(de)ADLQVLKPEPELVYEDLR	1	2240.17	2;3;4	K	G	19	sp|P01833|PIGR_HUMAN	232	250	yes	7.1242e-190	335.91	205	-3.0225	A1;A10;A3;A4;A5;A6;A7;A8;A9;B1;B10;B2;B3;B4;B5;B6;B7;B8;B9	10233000000	6799600000	16641000000	9579600000	10573000000	11864000000	5692300000	11315000000	11207000000	10412000000	10201000000	11033000000	12006000000	9692900000	16902000	6706200000	10019000000	2797500000	4432400000	0.982808	0.666562	1.38606	0.988311	625.547	1.76911	0.568151	4.04468	2.52843	1.04338e+10	0.3001	7731690200	0.5233
33	VYDPKNEEDDMVEMEEER	VYDPKNEEDDMVEM(ox)EEER;VYDPKNEEDDM(ox)VEM(ox)EEER;VYDPKN(de)EEDDMVEMEEER	1	2255.92	2;3	K	L	18	sp|P80303|NUCB2_HUMAN	277	294	yes	7.5188e-185	329.41	119	-0.94634	A1;A10;A3;A4;A5;A6;A7;A8;A9;B1;B10;B2;B3;B4;B6;B7;B8;B9	317870000	413900000	1184200000	660790000	211510000	503870000	673490000	1308800000	312280000	355090000	944130000	139080000	269660000	293040000	0	323750000	1987700000	307350000	26386000	0.895182	0.438393	4.39146	2.25495	--	1.55636	0.338829	4.25834	11.8351	6.20746e+08	0.6255	5.16243e+08	1.1758
34	AVLEKTDEPGKYTADGGK		2	1877.94	2;3;4	K	H	18	sp|P31025|LCN1_HUMAN	84	101	yes	1.0795e-184	326.89	388	-1.3413	A1;A10;A3;A4;A5;A6;A7;A8;A9;B1;B10;B2;B3;B4;B5;B6;B7;B8;B9	47965000	5841800000	892300000	139240000	37587000	5497300000	18308000000	5903700000	74640000	55514000	10708000000	138740000	281030000	55261000	1557900	3983800000	15870000000	1385800000	5804700000	0.864016	0.545555	3.17511	2.51968	24.1267	1.37991	1.15362	4.26014	0.0128585	4.0825e+09	1.4625	3828440290	1.4347
35	NMAEQIIQEIYSQIQSK	NM(ox)AEQIIQEIYSQIQSK;N(de)MAEQIIQEIYSQIQSK	0	2022.01	2;3	K	K	17	sp|P29401|TKT_HUMAN	265	281	yes	1.4144e-184	325.74	30	-1.0517	A1;A3;A4;A5;A6;A7;A8;A9;B1;B10;B2;B3;B4;B6;B7	16474000	0	124600000	43002000	293690000	109350000	17134000	29116000	698380000	10219000	80688000	279320000	119950000	99932000	0	438820000	37083000	0	0	1.6121	--	1.03877	0.430313	--	0.249191	0.462045	--	--	166468250	1.4052	1.52287e+08	1.0052
36	DVTVLQNTDGNNNEAWAK	DVTVLQNTDGNN(de)NEAWAK;DVTVLQNTDGN(de)N(de)NEAWAK	0	1987.92	2;3	K	D	18	sp|P02788|TRFL_HUMAN	566	583	yes	2.2725e-184	322.24	199	-1.8236	A1;A10;A3;A4;A5;A6;A7;A8;A9;B1;B10;B2;B3;B4;B5;B7;B8;B9	266600000	113140000	788790000	257220000	522850000	6385200000	276580000	362540000	516810000	192450000	1166300000	73782000	814790000	684340000	2074600	0	802990000	20581000	98508000	1.38529	0.0970076	0.96809	0.375866	252.024	--	0.344438	17.6153	5.24638	1.05441e+09	1.9052	4.28424e+08	1.0234
37	FSGSNSGNTATLTISR	FSGSN(de)SGNTATLTISR;FSGSN(de)SGN(de)TATLTISR	0	1611.79	2;3	R	V	16	sp|P80748|LV321_HUMAN;sp|A0A075B6K5|LV39_HUMAN	80	95	yes	3.9272e-181	329.37	224	-1.4407	A1;A10;A3;A4;A5;A6;A7;A8;A9;B1;B10;B2;B3;B4;B5;B6;B7;B8;B9	357780000	164120000	1774100000	81128000	265940000	639280000	444830000	222150000	2230800000	109860000	1162400000	63464000	157870000	515890000	4265300	1053100000	767250000	171790000	113200000	3.25669	0.141191	11.2377	0.157258	62.3497	0.607046	0.579772	1.29315	19.7067	6.86681e+08	1.1243	411908930	1.0556
38	KGGSFQLNELQGLK	KGGSFQLN(de)ELQGLK	1	1517.82	2;3	K	S	14	sp|P02788|TRFL_HUMAN	119	132	yes	1.6234e-178	322.62	227	-1.4279	A1;A10;A3;A4;A5;A6;A7;A8;A9;B1;B10;B2;B3;B4;B5;B6;B7;B8;B9	825100000	1166200000	4187600000	1106600000	1397900000	26354000000	1502600000	2172000000	3887500000	526410000	4560400000	402980000	2918100000	2995900000	7127000	1086800000	7293100000	218250000	1055500000	1.56741	0.255723	1.43504	0.369371	196.141	24.2492	0.20603	9.95189	3.68309	4.73328e+09	1.7321	2106456700	1.1177
39	TKELTSELKENFIR	TKELTSELKEN(de)FIR	2	1706.92	2;3;4	R	F	14	sp|P80188|NGAL_HUMAN	161	174	yes	3.1634e-178	326.05	172	-1.0354	A1;A10;A3;A4;A5;A6;A7;A8;A9;B1;B10;B2;B3;B4;B5;B6;B7;B8;B9	179180000	539060000	761370000	79918000	166050000	1493900000	465120000	326570000	1353800000	59383000	826000000	242540000	347200000	304080000	3465700	1319200000	412740000	87766000	218330000	3.01736	0.652615	2.19289	0.262819	47.9124	1.13243	1.12691	3.72092	6.20071	5.96108e+08	0.8647	382070470	1.0556
40	NVVDGQPFTNWYDNGSNQVAFGR	NVVDGQPFTNWYDN(de)GSNQVAFGR;NVVDGQ(de)PFTNWYDN(de)GSNQVAFGR	0	2584.17	2;3;4	R	G	23	sp|P04745|AMY1_HUMAN;sp|P19961|AMY2B_HUMAN;sp|P04746|AMYP_HUMAN	414	436	no	8.6965e-173	317.13	636	-3.2898	A1;A10;A3;A4;A5;A6;A7;A8;A9;B1;B10;B2;B3;B4;B5;B6;B7;B8;B9	10333000000	19670000000	4092600000	16232000000	12489000000	4988000000	11153000000	16037000000	4336000000	14567000000	3336400000	12569000000	3146200000	12848000000	19432000	2257000000	15261000000	432890000	3563200000	0.709343	5.89558	1.30081	1.26339	642.703	2.21001	0.730817	37.0464	1.21688	1.10367e+10	0.5154	6800012200	0.9102
41	EEDRIIPGGIYNADLNDEWVQR	EEDRIIPGGIYNADLN(de)DEWVQR	1	2601.25	2;3;4	K	A	22	sp|P01037|CYTN_HUMAN	25	46	yes	5.2962e-172	367.71	196	-4.058	A1;A10;A3;A4;A5;A6;A7;A8;A9;B1;B10;B2;B3;B4;B5;B6;B7;B8;B9	3355400000	7423500000	3712000000	1238200000	2294600000	3455900000	5496400000	6377100000	15548000000	3221600000	4236200000	1002300000	901730000	996000000	1342200	24765000000	14314000000	6975500000	1475400000	1.04153	1.7524	4.11653	1.24317	1709.58	0.139548	0.383988	0.914214	10.5382	5.43346e+09	0.7857	5788907220	1.3688
42	GFYPSDIAVEWESNGQPENNYK	GFYPSDIAVEWESNGQPEN(de)NYK;GFYPSDIAVEWESN(de)GQPEN(de)NYK	0	2543.12	2;3	K	T	22	sp|P01861|IGHG4_HUMAN;sp|P0DOX5|IGG1_HUMAN;sp|P01857|IGHG1_HUMAN	373	394	no	5.4898e-172	309.49	56	-4.0765	A1;A10;A4;A5;A6;A7;A8;A9;B1;B10;B2;B3;B4;B6;B7;B9	905860000	131130000	0	217960000	491020000	210650000	272240000	316380000	237600000	138620000	189260000	390670000	841600000	609770000	0	387820000	143980000	0	59093000	6.53484	0.692856	--	0.357446	--	0.543164	1.89082	--	4.02078	347855000	0.7153	345101625	0.7819
43	ADQLTEEQIAEFKEAFSLFDKDGDGTITTK	(ac)ADQLTEEQIAEFKEAFSLFDKDGDGTITTK	2	3346.61	3	M	E	30	sp|P0DP25|CALM3_HUMAN;sp|P0DP24|CALM2_HUMAN;sp|P0DP23|CALM1_HUMAN	2	31	yes	1.72e-167	297.14	4	-1.105	A6;A7;A8;A9;B6	0	0	0	0	0	149030000	36005000	39689000	223100000	0	0	0	0	0	0	552970000	0	0	0	--	--	--	--	--	0.269508	--	--	--	111956000	0.8108	552970000	--
44	VPFDAATLHTSTAMAAQHGMDDDGTGQK	VPFDAATLHTSTAMAAQHGM(ox)DDDGTGQK;VPFDAATLHTSTAM(ox)AAQHGM(ox)DDDGTGQK	0	2872.28	3;4	R	Q	28	sp|P06396|GELS_HUMAN	420	447	yes	2.5787e-167	266.17	51	-1.7001	A1;A10;A3;A4;A5;A6;A7;A8;A9;B1;B10;B3;B4;B6;B7;B8;B9	53248000	75742000	41365000	24348000	84245000	549630000	315950000	253750000	305800000	12445000	313910000	0	87169000	99015000	0	512250000	104420000	32056000	179340000	4.27867	0.241286	0.474538	0.245902	--	1.07297	3.02576	7.91583	1.70514	189342000	0.9432	167575625	1.0035
45	GDRSEDFGVNEDLADSDAR		1	2066.88	2;3	K	A	19	sp|P04083|ANXA1_HUMAN	186	204	yes	9.7284e-166	318.32	41	-0.80622	A10;A3;A6;A7;A8;A9;B1;B2;B3;B4;B5;B6;B7;B8;B9	0	62042000	45918000	0	0	455500000	752170000	180060000	286800000	79657000	0	20749000	128670000	74788000	13495000	402630000	354480000	12829000	52317000	--	--	0.356866	--	--	1.13131	2.1219	14.0354	5.48197	2.97082e+08	0.9086	1.26624e+08	1.1696
46	ALHFAISEYNKATEDEYYR	ALHFAISEYN(de)KATEDEYYR	1	2319.08	2;3;4	R	R	19	sp|P01036|CYTS_HUMAN	47	65	yes	7.7421e-165	341.18	191	-3.0285	A1;A10;A3;A4;A5;A6;A7;A8;A9;B1;B10;B2;B3;B4;B6;B7;B8;B9	632960000	2138100000	1920800000	221480000	457730000	2573200000	1786700000	1413000000	6361100000	566590000	4286500000	251830000	307030000	108990000	0	9687100000	7126700000	960510000	3303100000	1.11714	0.498799	6.25607	2.03211	--	0.265632	0.250705	1.47109	1.9258	1.94501e+09	0.9471	2.95537e+09	1.1765
47	LYHSEAFTVNFGDTEEAK		0	2056.94	2;3	K	K	18	sp|P01009|A1AT_HUMAN	161	178	yes	1.4684e-161	319.39	27	-0.91946	A1;A3;A4;A5;A6;A7;A8;A9;B1;B2;B3;B4;B5;B6;B7;B8	36044000	0	113120000	13394000	108050000	314970000	343800000	150550000	152690000	10479000	0	80972000	115740000	50426000	433290	276080000	63522000	145180000	0	3.43964	--	0.977363	0.265617	249.371	1.14086	5.4123	1.03699	--	154077250	0.7735	9.2854e+07	0.9543
48	NIITEIIHSILLPNQNGK	NIITEIIHSILLPNQN(de)GK	0	2016.14	2;3	K	L	18	sp|Q8TDL5|BPIB1_HUMAN	424	441	yes	1.4827e-160	316.61	24	-1.5918	A3;A4;A5;A6;A9;B1;B2;B3;B4	0	0	34874000	36929000	90388000	970740000	0	0	33877000	156300000	0	265040000	170980000	351730000	0	0	0	0	0	--	--	0.203965	0.104992	--	--	--	--	--	233361600	1.7694	236012500	0.3854
49	SSDYFGNGRVTEFKYGAK	SSDYFGN(de)GRVTEFKYGAK	2	2024.96	2;3;4	K	L	18	sp|P04745|AMY1_HUMAN;sp|P19961|AMY2B_HUMAN;sp|P04746|AMYP_HUMAN	259	276	no	1.1088e-159	317.77	146	-2.1314	A10;A3;A4;A6;A7;A8;A9;B10;B5;B6;B7;B8;B9	0	2895100000	346290000	20484000	0	302680000	2175700000	1920000000	469550000	0	1252100000	0	0	0	387740	648910000	3200900000	762270000	1600100000	--	2.3122	--	--	--	0.466444	0.679715	2.51879	0.29345	1.1614e+09	0.9812	1244111290	0.887
50	VIEHIMEDLDTNADK	VIEHIMEDLDTN(de)ADK;VIEHIM(ox)EDLDTNADK	0	1741.82	2;3	K	Q	15	sp|P06702|S10A9_HUMAN	58	72	yes	1.8323e-158	320.07	208	-4.4305	A1;A10;A3;A4;A5;A6;A7;A8;A9;B1;B10;B2;B3;B4;B5;B6;B7;B8;B9	3160700000	210050000	2673100000	631940000	6231800000	1916200000	2052300000	1687200000	3820700000	401670000	2241700000	108310000	1062200000	1501900000	26169000	2330000000	643860000	66591000	181420000	7.8689	0.0937012	2.51657	0.42076	238.137	0.822403	3.18749	25.3368	21.06	2487110000	0.7258	856382000	1.0393
51	EPQVYTLPPSRDELTK		1	1871.96	2;3	R	N	16	sp|P0DOX5|IGG1_HUMAN;sp|P01857|IGHG1_HUMAN	347	362	yes	1.3696e-157	318.46	1062	-4.4445	A1;A10;A3;A4;A5;A6;A7;A8;A9;B1;B10;B2;B3;B4;B5;B6;B7;B8;B9	688760000	303730000	792810000	231260000	610820000	1440900000	1879900000	863360000	2129200000	127380000	1320300000	226770000	561410000	709420000	4160200	2576000000	594090000	341020000	385710000	5.40713	0.230046	1.41218	0.325985	146.825	0.559356	3.16434	2.5317	5.52021	9.93416e+08	0.678	684626020	1.1098
52	LFVESYELILQEGTFK		0	1915	2;3	K	A	16	sp|Q9HC84|MUC5B_HUMAN	957	972	yes	4.744e-157	308	30	-0.9467	A1;A3;A4;A5;A6;A7;A8;A9;B1;B10;B2;B3;B4;B5;B6;B7	223070000	0	635960000	694480000	947250000	289830000	169570000	21705000	1039500000	548280000	136680000	1175300000	490950000	1374000000	6791700	598920000	95235000	0	0	0.406854	--	1.29537	0.505444	139.472	0.483921	1.78054	--	--	502670625	0.7542	5.5327e+08	0.9033
53	YAASSYLSLTPEQWK	YAASSYLSLTPEQ(de)WK	0	1742.85	1;2;3	K	S	15	sp|P0DOY2|IGLC2_HUMAN;sp|P0DOY3|IGLC3_HUMAN;sp|P0CF74|IGLC6_HUMAN;sp|A0M8Q6|IGLC7_HUMAN;sp|B9A064|IGLL5_HUMAN;sp|P0DOX8|IGL1_HUMAN;sp|P0CG04|IGLC1_HUMAN	66	80	no	4.7783e-157	318.64	228	-2.4202	A1;A10;A3;A4;A5;A6;A7;A8;A9;B1;B10;B2;B3;B4;B5;B6;B7;B8;B9	6593100000	1504300000	4534000000	3946100000	8152300000	5147000000	1497700000	1571700000	8192300000	4371500000	2680000000	4353500000	8446100000	6687000000	14190000	3582700000	2683200000	161270000	377470000	1.5082	0.561306	0.536816	0.590115	574.51	1.43663	0.558177	9.74577	21.7032	4.57094e+09	0.5921	3335693000	0.8375
54	SGKYDLDFKSPDDPSR		2	1825.85	2;3;4	R	Y	16	sp|P06733|ENOA_HUMAN	254	269	yes	6.1954e-157	311.69	163	-1.2689	A1;A10;A3;A4;A5;A6;A7;A8;A9;B1;B10;B2;B3;B4;B5;B6;B7;B8;B9	65926000	325080000	861570000	24550000	70088000	530850000	808450000	608430000	1569000000	16556000	1009900000	22133000	77080000	62998000	1112800	3456500000	1821200000	296470000	919560000	3.982	0.321893	11.1776	0.389695	62.9835	0.15358	0.443911	2.05225	1.70625	5.40438e+08	0.9244	768350980	1.4599
55	AHQTGETVTGSGTQTQAGATQTVEQDSSHQTGR		0	3355.53	4	R	T	33	sp|Q9UBG3|CRNN_HUMAN	220	252	yes	6.3317e-157	285.93	11	-0.25731	A10;A3;A6;A7;A8;A9;B1;B7;B8;B9	0	11412000	19924000	0	0	79217000	16376000	43915000	34387000	5209600	0	0	0	0	0	0	35144000	17588000	57172000	--	--	--	--	--	--	0.465969	2.49687	0.601466	3.42052e+07	0.7352	28778400	0.7841
56	VTVEDKDLVNTANWR	VTVEDKDLVNTAN(de)WR;VTVEDKDLVN(de)TAN(de)WR	1	1758.89	2;3	R	A	15	sp|Q02487|DSC2_HUMAN	376	390	yes	9.4645e-157	315.13	123	-1.0123	A1;A10;A3;A4;A5;A6;A7;A8;A9;B1;B10;B2;B3;B4;B5;B6;B7;B8;B9	183240000	695660000	950700000	370100000	209330000	56209000	432060000	1307900000	1655600000	178290000	647630000	293000000	247910000	695780000	510350	1543800000	980340000	152220000	275720000	1.02776	1.07416	3.83486	0.531921	410.169	0.0364095	0.440725	8.59217	6.00464	6.512e+08	0.8458	501520035	0.9425
57	DSQEEEKTEALTSAK		1	1664.77	2;3	K	R	15	sp|P06396|GELS_HUMAN;CON__Q3SX14	714	728	yes	2.4173e-156	307.15	47	-0.41449	A1;A10;A3;A4;A5;A6;A7;A8;A9;B1;B10;B2;B3;B4;B5;B6;B7;B8;B9	36514000	28731000	39030000	127450000	216540000	28696000	15797000	40084000	3181400	39198000	53491000	211650000	302390000	241140000	1233300	11405000	8643500	5895400	24715000	0.931527	0.537118	0.129072	0.528531	175.578	2.51609	1.82762	6.7992	0.128723	5.95582e+07	1.1508	89976120	1.2762
58	AMTVDREFPEMNLESVTPMTLTTLEGGNLEAK	AM(ox)TVDREFPEM(ox)NLESVTPMTLTTLEGGNLEAK;AM(ox)TVDREFPEMNLESVTPMTLTTLEGGNLEAK;AMTVDREFPEMN(de)LESVTPMTLTTLEGGNLEAK;AMTVDREFPEM(ox)N(de)LESVTPM(ox)TLTTLEGGNLEAK;AM(ox)TVDREFPEM(ox)NLESVTPM(ox)TLTTLEGGNLEAK;AMTVDREFPEMN(de)LESVTPM(ox)TLTTLEGGNLEAK	1	3523.69	2;3;4;5	K	V	32	sp|P31025|LCN1_HUMAN	39	70	yes	1.36e-155	361.77	219	-2.194	A1;A10;A3;A4;A5;A6;A7;A8;A9;B1;B10;B2;B3;B4;B6;B7;B8;B9	3602500000	2931000000	283930000	5690000000	2520100000	12699000000	8849200000	3722900000	1760700000	5303700000	1914300000	8703600000	7140300000	2542900000	0	5624700000	5617400000	34529000	881080000	0.679243	1.53111	0.0397644	2.2376	--	2.25772	1.57532	107.82	1.99834	4.67326e+09	0.83	4.19583e+09	0.7076
59	AVDESVLLLRPDR		1	1481.82	2;3	R	E	13	sp|A8K2U0|A2ML1_HUMAN	593	605	yes	9.8116e-155	318.89	72	-0.50911	A1;A10;A3;A4;A5;A6;A7;A8;A9;B1;B10;B2;B3;B4;B5;B6;B7;B8;B9	162140000	326330000	874650000	223650000	217950000	345250000	349160000	596300000	1425200000	61162000	184300000	193790000	265940000	329310000	6631300	1591900000	571380000	60452000	134230000	2.65099	1.77065	3.2889	0.679147	32.8669	0.216879	0.611082	9.86402	10.6176	5.02292e+08	0.8186	339909530	1.3804
60	QADEDYSHDLMLLR	QADEDYSHDLM(ox)LLR;(gl)QADEDYSHDLM(ox)LLR;(gl)QADEDYSHDLMLLR	0	1704.78	2;3	R	L	14	sp|P06870|KLK1_HUMAN	112	125	yes	1.0439e-154	312.48	242	-3.8478	A1;A10;A3;A4;A5;A6;A7;A8;A9;B1;B10;B2;B3;B4;B5;B6;B7;B8;B9	758870000	12741000000	2519500000	4851100000	2543900000	2710800000	2213100000	13845000000	20656000000	2081200000	6084500000	1810800000	3297600000	1164600000	4841800	9912800000	5600600000	2220600000	2712700000	0.364631	2.09401	0.764041	4.16546	525.404	0.273465	0.395154	6.2348	7.61455	6.98214e+09	1.0014	3489024180	0.8386
61	AFSAVDTDGNGTINAQELGAALK	AFSAVDTDGN(de)GTINAQELGAALK	0	2262.11	2;3	K	A	23	sp|Q9NZT1|CALL5_HUMAN	16	38	yes	6.1299e-151	306.05	18	-1.2193	A1;A3;A4;A5;A8;A9;B1;B2;B3;B4;B6;B8;B9	10319000	0	105850000	53806000	193220000	0	0	80292000	166900000	60922000	0	42784000	62467000	63194000	0	198470000	0	23562000	105500000	0.169381	--	1.69449	0.851442	--	--	--	3.40769	1.58199	1.01731e+08	0.6774	79557000	0.7295
62	VHVSEEGTEPEAMLQVLGPKPALPAGTEDTAKEDAANR	VHVSEEGTEPEAMLQ(de)VLGPKPALPAGTEDTAKEDAANR;VHVSEEGTEPEAM(ox)LQVLGPKPALPAGTEDTAKEDAANR	2	3956.94	4;5	R	K	38	sp|P06396|GELS_HUMAN	258	295	yes	2.8828e-149	264.96	55	-1.0026	A1;A10;A5;A6;A7;A8;A9;B1;B10;B2;B3;B4;B6;B7;B8;B9	18895000	402640000	0	0	55097000	427480000	289680000	347080000	594060000	18081000	125520000	94994000	141790000	62465000	0	764620000	390980000	46011000	182380000	1.04502	3.20778	--	--	--	0.559075	0.740907	7.54341	3.25727	3.0499e+08	0.6751	2.02982e+08	1.17
63	NMLKMEWNKEAAANAQK	NMLKMEWNKEAAAN(de)AQK;NM(ox)LKMEWNKEAAANAQK;N(de)MLKMEWNKEAAAN(de)AQK	2	1975.96	2;3;4	R	W	17	sp|P54108|CRIS3_HUMAN	59	75	yes	6.625e-148	321.85	38	-2.6256	A10;A3;A7;A8;A9;B10;B6;B7;B8;B9	0	112790000	104540000	0	0	0	29526000	18394000	113220000	0	364540000	0	0	0	0	427390000	824860000	81535000	31905000	--	0.309404	--	--	--	--	0.0357952	0.225596	3.54866	75694000	0.6277	346046000	0.9194
64	VIEHIMEDLDTNADKQLSFEEFIMLMAR	VIEHIM(ox)EDLDTNADKQLSFEEFIMLMAR;VIEHIM(ox)EDLDTN(de)ADKQLSFEEFIMLMAR	1	3337.6	3;4	K	L	28	sp|P06702|S10A9_HUMAN	58	85	yes	1.8353e-145	289.73	27	-1.737	A1;A4;A5;A9;B1;B2;B3;B4;B5;B6	468990000	0	0	93668000	1309600000	0	0	0	312210000	9158700	0	36094000	522040000	633880000	1129100	429590000	0	0	0	51.207	--	--	0.147769	1159.86	--	--	--	--	546117000	0.9737	2.71982e+08	1.0611
65	ASQSVSSNLAWYQQKPGQAPR	ASQSVSSN(de)LAWYQQKPGQAPR	1	2302.15	2;3;4	R	L	21	sp|P01624|KV315_HUMAN;sp|A0A087WSY6|KVD15_HUMAN	45	65	no	7.3179e-144	353.45	91	-3.1892	A1;A10;A3;A4;A5;A6;A7;A8;A9;B1;B10;B2;B3;B4;B5;B6;B7;B8;B9	227800000	173980000	399960000	79356000	155790000	543210000	403130000	248250000	430840000	53290000	749690000	46136000	139390000	230780000	297420	477480000	201180000	147620000	81005000	4.27472	0.232069	2.86936	0.34386	523.805	1.13766	2.00383	1.68168	5.31868	2.95813e+08	0.521	212686842	1.0905
66	VFQSLPHENKPLTLSNYQTNK	VFQSLPHENKPLTLSN(de)YQTNK	1	2457.27	2;3;4	R	A	21	sp|P04080|CYTB_HUMAN	69	89	yes	1.7258e-143	316.97	387	-2.0765	A1;A10;A3;A4;A5;A6;A7;A8;A9;B1;B10;B2;B3;B4;B5;B6;B7;B8;B9	2502200000	362000000	3017800000	3823900000	3158000000	1591700000	869590000	1447700000	8595200000	1692500000	46923000	3312800000	2388600000	4047400000	18935000	2264900000	2008600000	47013000	299330000	1.4784	7.71477	1.26342	0.944779	166.781	0.702768	0.432933	30.7936	28.7148	2.81868e+09	0.8677	1612700100	0.9051
67	NIETIINTFHQYSVK	NIETIIN(de)TFHQYSVK;N(de)IETIIN(de)TFHQYSVK	0	1805.93	2;3	R	L	15	sp|P06702|S10A9_HUMAN	11	25	yes	2.3263e-139	289.86	233	-1.9682	A1;A10;A3;A4;A5;A6;A7;A8;A9;B1;B10;B2;B3;B4;B5;B6;B7;B8;B9	7491800000	984260000	3218400000	1757500000	15292000000	4857000000	6091700000	3906500000	5987700000	841670000	6586700000	470290000	4040400000	3925000000	12716000	10489000000	3677900000	235430000	448090000	8.90111	0.149431	0.796555	0.447771	1202.58	0.463057	1.6563	16.593	13.3627	5.50965e+09	0.7673	3072719600	1.1139
68	EAFSLFDKDGDGTITTK		1	1843.88	2;3	K	E	17	sp|P0DP25|CALM3_HUMAN;sp|P0DP24|CALM2_HUMAN;sp|P0DP23|CALM1_HUMAN	15	31	yes	2.9058e-139	350.18	63	-0.5488	A1;A10;A3;A4;A5;A6;A7;A8;A9;B1;B10;B2;B3;B4;B5;B6;B7;B9	254540000	319190000	275450000	260070000	452890000	356650000	51294000	306760000	793090000	143020000	120300000	368820000	506300000	391750000	1533800	432430000	91195000	0	67860000	1.77975	2.65328	0.544045	0.663867	295.273	0.824758	0.562465	--	11.6872	3.41104e+08	0.5873	2.35912e+08	0.7927
69	QDPPSVVVTSHQAPGEKK	(gl)QDPPSVVVTSHQAPGEKK;Q(de)DPPSVVVTSHQAPGEKK	1	1902.98	2;3;4	R	K	18	sp|P25311|ZA2G_HUMAN	204	221	yes	3.7718e-138	297.53	395	-2.0083	A1;A10;A3;A4;A5;A6;A7;A8;A9;B1;B10;B2;B3;B4;B5;B6;B7;B8;B9	147190000	711660000	4131400000	200750000	153960000	2002800000	1499300000	965540000	1856900000	148380000	1940400000	214030000	256440000	242840000	760990	3249000000	1636300000	519960000	686820000	0.99198	0.366759	16.1106	0.826676	202.315	0.616436	0.916275	1.85695	2.70362	1.29661e+09	0.9895	889493099	1.1863
70	SLKELQEMDKDDESLIK	SLKELQEM(ox)DKDDESLIK	2	2020	2;3;4	K	Y	17	sp|P52566|GDIR2_HUMAN	31	47	yes	4.3596e-138	327.97	12	-0.19056	A10;A6;A7;A8;B10;B7;B9	0	805990000	0	0	0	69573000	90586000	67606000	0	0	177620000	0	0	0	0	0	51423000	0	339170000	--	4.53772	--	--	--	--	1.76159	--	--	258438750	1.413	1.89404e+08	0.7615
71	AILDKLHNLNSNWFPEGSKPFIYQEVIDLGGEPIK	AILDKLHNLN(de)SNWFPEGSKPFIYQEVIDLGGEPIK;AILDKLHNLN(de)SN(de)WFPEGSKPFIYQEVIDLGGEPIK	2	3981.07	3;4;5	K	S	35	sp|P04745|AMY1_HUMAN	224	258	yes	8.0686e-138	275.47	68	-3.8802	A1;A3;A4;A5;A6;A9;B1;B2;B3;B4;B5	1935400000	0	102190000	4094800000	2593900000	857840000	0	0	194440000	1397000000	0	1597700000	1050600000	2770100000	9141100	0	0	0	0	1.3854	--	0.0972682	1.47821	283.762	--	--	--	--	1.62976e+09	0.9541	1364908220	0.7296
72	YFSTTEDYDHEITGLR		0	1945.87	2;3;4	K	V	16	sp|Q96DA0|ZG16B_HUMAN	63	78	yes	2.1196e-135	303.36	283	-1.4033	A1;A10;A3;A4;A5;A6;A7;A8;A9;B1;B10;B2;B3;B4;B5;B6;B7;B8;B9	9088800000	1886000000	47243000000	17331000000	8394600000	14358000000	6215200000	9491800000	11635000000	19284000000	30827000000	8881200000	8535700000	7100800000	51335000	4103900000	19213000000	1365800000	2095800000	0.471313	0.0611801	5.53475	2.44071	163.526	3.49862	0.323489	6.94963	5.55158	1.39604e+10	0.9493	10145853500	0.9786
73	DTEEEDFHVDQVTTVK		0	1890.85	2;3	K	V	16	sp|P01009|A1AT_HUMAN	226	241	yes	5.5434e-135	322.42	26	-2.9093	A1;A10;A4;A5;A6;A7;A8;B1;B10;B2;B3;B4;B8;B9	43739000	21871000	0	25292000	212740000	265480000	179800000	85360000	0	21064000	40870000	165330000	186040000	152920000	0	0	0	65354000	52710000	2.07648	0.535136	--	0.165394	--	--	--	1.30612	--	1.19183e+08	0.8317	9.77554e+07	0.6938
74	VVSVLTVLHQDWLNGK	VVSVLTVLHQDWLN(de)GK	0	1807	2;3	R	E	16	sp|P01860|IGHG3_HUMAN;sp|P01861|IGHG4_HUMAN;sp|P0DOX5|IGG1_HUMAN;sp|P01857|IGHG1_HUMAN	304	319	no	8.7599e-135	301.35	57	-0.47503	A1;A3;A4;A5;A6;A7;A8;A9;B1;B10;B2;B3;B4;B6;B7;B8;B9	3055000000	0	156520000	832120000	1445300000	866620000	789930000	171880000	892520000	420140000	558790000	637490000	2205700000	1993800000	0	335100000	87253000	7518500	165470000	7.27139	--	0.0709616	0.417354	--	2.58615	9.05333	22.8609	5.39385	1026236250	0.8957	7.12362e+08	1.1443
75	MKENAEVGTTSNGYK	MKEN(de)AEVGTTSN(de)GYK;MKENAEVGTTSN(de)GYK	1	1627.75	2;3	R	A	15	sp|Q02487|DSC2_HUMAN	480	494	yes	1.1092e-134	295.32	118	-0.91236	A1;A10;A3;A4;A5;A6;A7;A8;A9;B1;B10;B2;B3;B4;B6;B7;B8;B9	2381100	31642000	57668000	23541000	29160000	15940000	14938000	65398000	2632500	5380500	44974000	34181000	22658000	41733000	0	73359000	66319000	42118000	27056000	0.442543	0.703562	2.54515	0.564086	--	0.217288	0.225245	1.55273	0.0972982	27033400	0.8189	3.97532e+07	0.529
76	FKLEESYTLNSDLAR	FKLEESYTLN(de)SDLAR	1	1784.89	2;3	R	L	15	sp|P30740|ILEU_HUMAN	276	290	yes	1.6062e-134	305.11	106	-3.7957	A1;A10;A3;A4;A5;A6;A7;A8;A9;B1;B10;B2;B3;B4;B6;B7;B9	168340000	435370000	312710000	172790000	408600000	291200000	604230000	572550000	1107400000	69515000	291040000	393490000	410270000	300970000	0	1084600000	558070000	0	256050000	2.42164	1.49591	0.762205	0.57411	--	0.268486	1.08271	--	4.32494	4.52577e+08	0.6409	420500625	0.7202
77	TNETYGKLEAVQYK	TN(de)ETYGKLEAVQYK	1	1642.82	2;3	K	T	14	sp|P01040|CYTA_HUMAN	31	44	yes	1.8307e-133	305.3	126	-1.9891	A1;A10;A3;A4;A5;A6;A7;A8;A9;B1;B10;B2;B3;B4;B5;B6;B7;B8;B9	357810000	145840000	1745300000	198020000	229010000	1041400000	669150000	436630000	5030600000	94437000	344020000	349810000	194240000	327380000	8211000	174890000	219850000	15488000	203690000	3.78888	0.423929	8.98528	0.604863	27.8906	5.9546	3.04367	28.1915	24.6973	1.09486e+09	1.427	193201600	0.6501
78	LGAHQLDSYSEDAK		0	1532.71	2;3	K	V	14	sp|Q16651|PRSS8_HUMAN	100	113	yes	1.0241e-132	296.32	42	-0.59687	A1;A10;A3;A4;A5;A6;A7;A8;A9;B1;B10;B2;B3;B4;B5;B6;B7;B8;B9	25782000	93246000	787630000	24093000	21654000	337200000	335440000	235710000	687510000	124880000	337740000	16328000	12088000	32574000	1052500	791710000	384110000	19978000	92559000	0.206454	0.276088	65.158	0.739639	20.5739	0.425914	0.873292	11.7985	7.4278	2.83141e+08	1.0173	181301950	1.4071
79	FGQGSGPIVLDDVR	FGQ(de)GSGPIVLDDVR	0	1458.75	1;2;3	Q	C	14	sp|Q9UGM3|DMBT1_HUMAN	289	302	yes	1.757e-132	300.78	214	-0.65111	A1;A10;A3;A4;A5;A6;A7;A8;A9;B1;B10;B2;B3;B4;B5;B6;B7;B8;B9	4107300000	10130000000	39595000000	10760000000	10314000000	21683000000	6873300000	19399000000	22624000000	13104000000	29029000000	6405200000	4355300000	4994800000	169860000	8259300000	37882000000	15833000000	10599000000	0.313439	0.348961	9.09122	2.15424	60.7206	2.62528	0.18144	1.22523	2.13454	1.61651e+10	0.6788	13063146000	0.9055
80	EVDLKDYEDQQK		1	1508.7	2;3	R	Q	12	sp|P02671|FIBA_HUMAN	191	202	yes	3.9167e-132	341.15	64	-0.29744	A1;A10;A3;A4;A5;A6;A7;A8;A9;B1;B10;B2;B3;B4;B5;B6;B7;B8;B9	172170000	48211000	388280000	30321000	131260000	283810000	392380000	127360000	494020000	15364000	304390000	49728000	150470000	50529000	8138800	391860000	33057000	113490000	321050000	11.2061	0.158386	2.58045	0.600071	16.1277	0.724264	11.8698	1.12221	1.53876	2.29757e+08	0.7227	143807680	0.9954
81	GGPGSAVSPYPTFNPSSDVAALHK		0	2355.15	3	K	A	24	sp|P04083|ANXA1_HUMAN	30	53	yes	1.4262e-129	208.98	16	-1.9243	A1;A3;A4;A5;A6;A7;A8;A9;B1;B2;B3;B4;B5;B6;B7	104840000	0	149760000	115420000	138960000	702810000	395960000	256180000	476000000	219850000	0	57038000	252780000	117400000	519980	288590000	419320000	0	0	0.476871	--	0.592452	0.983135	267.241	2.43532	0.944291	--	--	292491250	0.7362	1.93643e+08	0.7481
82	NILDRQDPPSVVVTSHQAPGEKK	N(de)ILDRQDPPSVVVTSHQAPGEKK	2	2514.32	2;3;4;5	K	K	23	sp|P25311|ZA2G_HUMAN	199	221	yes	7.2336e-129	286.57	301	-0.4391	A1;A10;A3;A4;A5;A6;A7;A8;A9;B1;B10;B2;B3;B4;B6;B7;B8;B9	13838000	4746100000	8737700000	9800300	15317000	3207200000	4711600000	3210300000	13180000000	25132000	6799500000	27551000	58217000	32637000	0	13450000000	9503900000	2523200000	2810100000	0.550613	0.698007	150.088	0.300282	--	0.238454	0.495754	1.27231	4.69022	4.20354e+09	1.0517	3.91447e+09	1.2574
83	VPVAVQGEDTVQSLTQGDGVAK		0	2197.12	2;3	R	L	22	sp|P01024|CO3_HUMAN	387	408	yes	2.9721e-128	359.25	27	-0.35753	A1;A3;A4;A5;B1;B2;B3;B4;B5;B6;B7;B8	293790000	0	109490000	81337000	245010000	0	0	0	0	61877000	0	179700000	258060000	212090000	317660	159470000	96214000	67830000	0	4.74797	--	0.424281	0.383502	771.296	--	--	--	--	182406750	0.5649	1.29445e+08	0.6718
84	ADSSPVKAGVETTTPSKQSNNK	ADSSPVKAGVETTTPSKQSN(de)N(de)K;ADSSPVKAGVETTTPSKQSN(de)NK	2	2245.12	3;4	K	Y	22	sp|P0DOY2|IGLC2_HUMAN;sp|P0DOY3|IGLC3_HUMAN	44	65	yes	4.8169e-128	281.66	90	-1.0339	A10;A7;A8;B10;B6;B7;B8;B9	0	99613000	0	0	0	0	5196500	42436000	0	0	57322000	0	0	0	0	18587000	211230000	168660000	87280000	--	1.73778	--	--	--	--	0.0246011	0.251607	--	4.90818e+07	0.9689	108615800	0.7326
85	VQWKVDNALQSGNSQESVTEQDSK	VQWKVDNALQSGN(de)SQESVTEQDSK;VQWKVDN(de)ALQSGN(de)SQESVTEQDSK	1	2676.26	2;3	K	D	24	sp|P01834|IGKC_HUMAN;sp|P0DOX7|IGK_HUMAN	146	169	no	3.1837e-126	346.63	86	-2.0859	A10;A3;A6;A7;A8;A9;B10;B6;B7;B8;B9	0	326280000	313760000	0	0	346790000	430460000	342170000	164210000	0	692220000	0	0	0	0	472190000	679870000	149720000	207610000	--	0.471353	--	--	--	0.734429	0.63315	2.2854	0.790954	3.20612e+08	0.271	440322000	0.5795
86	AGVETTTPSKQSNNKYAASSYLSLTPEQWK	AGVETTTPSKQSN(de)NKYAASSYLSLTPEQWK	2	3285.62	3;4	K	S	30	sp|P0DOY2|IGLC2_HUMAN;sp|P0DOY3|IGLC3_HUMAN	51	80	yes	1.0758e-124	264.21	42	-2.0045	A10;A3;A6;A7;A8;A9;B10;B6;B7;B8;B9	0	737730000	228500000	0	0	333640000	182730000	236320000	536330000	0	833260000	0	0	0	0	1785200000	939300000	181360000	348820000	--	0.885354	--	--	--	0.186892	0.194538	1.30304	1.53756	375875000	0.5792	817588000	0.7677
87	LDGQISSAYPSQEGQVLVGIYGQYQLLGIK	LDGQISSAYPSQ(de)EGQVLVGIYGQYQLLGIK	0	3223.68	2;3;4	K	S	30	sp|Q96DA0|ZG16B_HUMAN	148	177	yes	1.699e-124	264.92	319	-3.5223	A1;A3;A4;A5;A6;A9;B1;B2;B3;B4;B5	1711600000	0	202810000	6130400000	2900600000	61576000	0	0	100720000	6309600000	0	3327800000	2257800000	2239900000	28338000	0	0	0	0	0.271269	--	0.0898264	2.73691	102.357	--	--	--	--	1.85128e+09	1.2877	2832687600	0.8066
88	NNQLVAGYLQGPNVNLEEK	N(de)NQLVAGYLQGPNVNLEEK;N(de)NQLVAGYLQ(de)GPNVNLEEK	0	2099.06	2	R	I	19	sp|P18510|IL1RA_HUMAN	52	70	yes	1.3681e-121	286.26	26	-2.982	A1;A4;A5;A8;A9;B1;B2;B3;B4;B6	49623000	0	0	79897000	117360000	0	0	110120000	114710000	8477400	0	120070000	97129000	124970000	0	69449000	0	0	0	5.85356	--	--	0.639329	--	--	--	--	--	94342000	0.3091	84019080	0.5667
89	LYHSEAFTVNFGDTEEAKK	LYHSEAFTVN(de)FGDTEEAKK	1	2185.03	2;3;4	K	Q	19	sp|P01009|A1AT_HUMAN	161	179	yes	1.4512e-121	284.51	138	-1.3718	A1;A10;A3;A4;A5;A6;A7;A8;A9;B1;B10;B2;B3;B4;B5;B6;B7;B8;B9	130490000	253200000	499290000	56450000	167740000	1244200000	1140000000	495270000	1747700000	106730000	1260400000	488730000	244590000	130640000	1567100	787630000	205480000	266860000	603730000	1.22262	0.200889	2.04133	0.432103	107.038	1.57968	5.54799	1.85592	2.89484	6.37149e+08	0.9377	409635710	0.9406
90	TDEPGKYTADGGKHVAYIIR		2	2190.11	2;3;4;5	K	S	20	sp|P31025|LCN1_HUMAN	89	108	yes	2.2603e-121	283.1	170	-1.5907	A10;A3;A4;A6;A7;A8;A9;B10;B2;B3;B4;B6;B7;B8;B9	0	1759600000	199500000	21914000	0	3076100000	5418300000	858290000	557330000	0	2499300000	56171000	19716000	13250000	0	5562200000	3243200000	279200000	797030000	--	0.704037	10.1187	1.65389	--	0.553037	1.67066	3.0741	0.699258	1.69872e+09	1.1477	1558758375	1.3054
91	VTMTTDTSTSTAYMELR	VTM(ox)TTDTSTSTAYMELR	0	1906.87	2;3	R	S	17	sp|A0A0C4DH31|HV118_HUMAN	87	103	yes	6.9303e-118	291.13	31	-0.85284	A1;A10;A3;A4;A5;A6;A7;A8;A9;B1;B10;B2;B3;B4;B6;B7;B8;B9	123080000	111780000	169650000	40822000	143110000	231830000	161430000	178990000	360390000	26472000	319730000	52620000	134170000	172480000	0	114010000	118430000	91357000	50220000	4.64944	0.349607	1.26444	0.236677	--	2.03342	1.36308	1.95924	7.17622	1.69009e+08	0.526	1.19943e+08	0.7332
92	KIEPELDGSAQVTSHDASTNGLINFIK	KIEPELDGSAQVTSHDASTN(de)GLINFIK	1	2883.46	3;4	K	Q	27	sp|P06744|G6PI_HUMAN	524	550	yes	1.7682e-117	274.88	29	-3.3218	A1;A10;A4;A5;A6;A7;A8;A9;B10;B2;B3;B4;B6;B7;B9	39441000	262430000	0	132940000	220140000	116580000	98982000	562680000	361660000	0	83244000	364940000	49565000	22523000	0	299540000	110660000	0	132320000	--	3.15254	--	5.90241	--	0.389197	0.89447	--	2.73322	224356625	0.7621	1.51827e+08	0.8554
93	TLQALEFHTVPFQLLAR		0	1983.09	2;3	K	Y	17	sp|Q08380|LG3BP_HUMAN	377	393	yes	3.7613e-117	286.74	16	-1.129	A1;A3;A4;A5;A9;B1;B2;B3;B4	327010000	0	37785000	378230000	346880000	0	0	0	88594000	270650000	0	201760000	344630000	707570000	0	0	0	0	0	1.20824	--	0.109639	0.534548	--	--	--	--	--	235699800	0.6769	381152500	0.5911
94	EQIVGGVNYFFDIEVGR	EQIVGGVN(de)YFFDIEVGR	0	1940.96	2;3	R	T	17	sp|P09228|CYTT_HUMAN	75	91	yes	3.8285e-117	286.65	296	-1.8706	A1;A10;A4;A5;A9;B1;B2;B3;B4;B5;B6	507690000	80663000	0	233870000	339500000	0	0	0	191580000	108280000	0	96567000	132080000	57714000	18453000	164950000	0	0	0	4.68868	--	--	4.05222	18.3981	--	--	--	--	270660600	0.5975	9.63407e+07	0.543
95	LTDPTGWVTIDENTGSIK		0	1945.96	2	K	V	18	sp|Q02487|DSC2_HUMAN	511	528	yes	4.0748e-117	279.77	20	-0.61821	A1;A10;A3;A4;A5;A8;B1;B2;B3;B4;B6;B7	32256000	58389000	58410000	128870000	50634000	0	0	115130000	0	49185000	0	75450000	84067000	103240000	0	126720000	80975000	0	0	0.65581	--	0.694803	1.24826	--	--	--	--	--	7.39482e+07	0.523	8.66062e+07	0.3032
96	TLTGTAALTVQSQEDNLR		0	1916.98	2;3	R	S	18	sp|P09960|LKHA4_HUMAN	34	51	yes	4.507e-117	278.46	32	-0.6764	A1;A10;A3;A4;A5;A6;A7;A8;B10;B2;B3;B4;B6;B7;B8;B9	92151000	159520000	0	39178000	146580000	51402000	138030000	77429000	0	0	120300000	113350000	71552000	90216000	0	260360000	0	0	60225000	--	1.32602	--	0.434269	--	0.197427	--	--	--	1.00613e+08	0.4765	1.19334e+08	0.6106
97	HQLYIDETVNSNIPTNLR		0	2126.08	2	K	V	18	sp|P02675|FIBB_HUMAN	179	196	yes	4.5241e-117	323.37	3	-0.72393	A1;A5;B3	14852000	0	0	0	35765000	0	0	0	0	0	0	0	18886000	0	0	0	0	0	0	--	--	--	--	--	--	--	--	--	25308500	0.5843	18886000	--
98	IAEYMNHLIDIGVAGFR	IAEYM(ox)NHLIDIGVAGFR;IAEYMN(de)HLIDIGVAGFR;IAEYM(ox)N(de)HLIDIGVAGFR	0	1917.98	2;3;4	K	I	17	sp|P04745|AMY1_HUMAN;sp|P19961|AMY2B_HUMAN;sp|P04746|AMYP_HUMAN	194	210	no	6.0912e-117	288.52	285	-4.4188	A1;A10;A3;A4;A5;A6;A7;A8;A9;B1;B10;B2;B3;B4;B5;B6;B7;B8;B9	35265000000	864750000	1383100000	49740000000	27784000000	3090600000	1970300000	838950000	4201500000	40507000000	577250000	38639000000	12223000000	38323000000	79154000	297330000	843540000	121300000	523190000	0.87059	1.49805	0.113156	1.29792	351.012	10.3945	2.33575	6.91632	8.03054	1.39042e+10	1.3417	13213376400	1.3834
99	EITENLMATGDLDQDGR		0	1876.85	2;3	R	I	17	sp|P13796|PLSL_HUMAN	52	68	yes	9.5491e-117	278.46	22	-1.9951	A1;A4;A5;A8;A9;B2;B3;B4	151570000	0	0	59944000	209480000	0	0	73432000	93256000	0	0	213310000	215220000	104550000	0	0	0	0	0	--	--	--	0.573352	--	--	--	--	--	117536400	0.529	1.77693e+08	0.3565
100	LGHPDTLNQGEFKELVR	LGHPDTLN(de)QGEFKELVR	1	1952.01	2;3;4	K	K	17	sp|P06702|S10A9_HUMAN	26	42	yes	1.8226e-116	297.16	252	-2.8104	A10;A3;A6;A7;A8;A9;B10;B6;B7;B8;B9	0	1283400000	1534200000	0	0	1707500000	6032500000	4615500000	5878200000	0	7983500000	0	0	0	0	9400000000	5545900000	811870000	1361800000	--	0.160757	--	--	--	0.181649	1.08774	5.68502	4.31649	3508550000	0.6412	5020614000	0.7671
101	SEETKENEGFTVTAEGK		1	1854.85	2;3	R	G	17	sp|P01024|CO3_HUMAN	1321	1337	yes	1.8924e-116	327.57	47	-1.0771	A1;A10;A3;A4;A5;A6;A7;A8;A9;B1;B10;B3;B4;B5;B6;B7;B8;B9	48498000	7790100	139940000	22217000	51412000	175980000	209790000	24047000	90376000	0	135190000	0	25726000	41647000	1227900	35838000	61613000	87762000	213530000	--	0.0576233	5.43963	0.53346	41.8699	4.91043	3.40496	0.274002	0.423247	8.55611e+07	0.8566	7.53167e+07	0.9208
102	LSGLLDLALGKDYVR		1	1631.92	2;3	R	S	15	sp|P04745|AMY1_HUMAN	177	191	yes	8.1437e-115	291.5	414	-1.5059	A1;A10;A3;A4;A5;A6;A7;A8;A9;B1;B10;B2;B3;B4;B5;B6;B7;B8;B9	9558200000	29843000000	9017400000	10518000000	7343600000	18616000000	21677000000	24170000000	14051000000	10251000000	12265000000	10127000000	3662200000	9440800000	20064000	8175800000	24777000000	303790000	9378400000	0.932416	2.43318	2.46229	1.1141	366.009	2.27696	0.874884	79.5615	1.49823	1.60882e+10	0.4896	8840105400	0.798
103	STAGDTHLGGEDFDNR		0	1690.72	2;3	K	M	16	sp|P11142|HSP7C_HUMAN;sp|P54652|HSP72_HUMAN	221	236	yes	9.7992e-115	288.52	46	-0.56624	A1;A10;A3;A4;A5;A6;A7;A8;A9;B1;B10;B2;B3;B4;B5;B6;B7;B8;B9	23554000	158230000	104400000	20607000	32038000	393260000	380450000	339590000	1205300000	21831000	340490000	72823000	106990000	167060000	5796600	1325200000	447940000	68872000	237430000	1.07892	0.464713	0.975792	0.123351	5.52703	0.296755	0.849332	4.93074	5.07644	2.9527e+08	1.2676	279443260	1.4105
104	EPQVYTLPPSREEMTK	EPQVYTLPPSREEM(ox)TK;EPQ(de)VYTLPPSREEM(ox)TK	1	1903.93	2;3	R	N	16	sp|P01859|IGHG2_HUMAN;sp|P01860|IGHG3_HUMAN	275	290	no	3.1314e-114	286.26	594	-4.0342	A1;A10;A3;A4;A5;A6;A7;A8;A9;B1;B10;B2;B3;B4;B5;B6;B7;B8;B9	171840000	62073000	247590000	55930000	151480000	1275600000	1229400000	407470000	3459900000	26542000	1051200000	148180000	495790000	325560000	1296000	1909900000	149450000	470920000	564710000	6.47427	0.0590497	0.499385	0.171796	116.883	0.667888	8.22616	0.865264	6.12686	784587000	1.4147	514354800	1.1308
105	VFDKDGNGFVSAAELR	VFDKDGN(de)GFVSAAELR	1	1723.85	2;3	R	H	16	sp|P27482|CALL3_HUMAN	92	107	yes	7.2524e-114	282.12	53	-0.6644	A1;A10;A3;A4;A5;A6;A7;A8;A9;B1;B10;B2;B3;B4;B5;B6;B7;B8;B9	100610000	253670000	541720000	144800000	311180000	446560000	224390000	700780000	1423100000	61085000	90882000	184160000	198440000	242160000	1077600	871910000	466850000	61787000	268410000	1.64705	2.7912	2.72989	0.597952	288.771	0.512163	0.480647	11.3419	5.30196	4.60757e+08	0.8886	244676160	1.0547
106	HGTDDGVVWMNWK	HGTDDGVVWM(ox)NWK	0	1543.69	2;3	K	G	13	sp|P02675|FIBB_HUMAN	459	471	yes	8.7954e-114	291.87	21	-3.8366	A1;A4;A5;A6;A7;A9;B1;B10;B2;B3;B4;B6;B8;B9	82182000	0	0	24304000	116090000	76428000	90514000	0	125200000	6485000	69559000	51682000	91166000	52930000	0	92371000	0	29003000	38273000	12.6726	--	--	0.459172	--	0.827403	--	--	3.27124	8.57863e+07	0.4162	53933625	0.5532
107	TGPAATTLPDGAAAESLVESSEVAVIGFFKDVESDSAK		1	3765.85	3;4	R	Q	38	sp|P07237|PDIA1_HUMAN	133	170	yes	2.055e-113	239.06	6	-0.27898	A9;B6	0	0	0	0	0	0	0	0	236630000	0	0	0	0	0	0	303640000	0	0	0	--	--	--	--	--	--	--	--	--	236630000	--	303640000	--
108	HNVYINGITYTPVSSTNEK	HNVYIN(de)GITYTPVSSTNEK	0	2136.05	2;3	R	D	19	sp|P01023|A2MG_HUMAN	646	664	yes	5.3993e-113	275.83	14	-3.4574	A1;A10;A4;A5;B2;B3;B4;B5;B8;B9	37387000	10158000	0	16743000	38838000	0	0	0	0	0	0	94640000	62915000	54235000	358790	0	0	13671000	26697000	--	--	--	0.308712	108.247	--	--	--	--	25781500	0.5625	4.20861e+07	0.8319
109	TLAGGIHATDLNDK	TLAGGIHATDLN(de)DK	0	1424.73	2;3	R	S	14	sp|P28325|CYTD_HUMAN	29	42	yes	9.4182e-113	286.19	50	-1.6491	A1;A3;A4;A5;A6;B1;B10;B2;B3;B4;B5;B6;B7;B8;B9	2773600000	0	183880000	2400800000	201500000	0	0	0	0	1359700000	386750000	333200000	131410000	99432000	7146000	125310000	96952000	299990000	805700000	2.03986	--	1.39928	24.1451	28.1976	--	--	--	--	1389945000	1.0006	364559000	1.1463
110	KAADDTWEPFASGK		1	1521.71	2;3	R	T	14	sp|P02766|TTHY_HUMAN	55	68	yes	1.5993e-112	279.77	74	-1.6613	A1;A10;A3;A4;A5;A6;A7;A8;A9;B1;B10;B2;B3;B4;B6;B7;B8;B9	285990000	297440000	203320000	203010000	193650000	870940000	1180400000	292700000	956050000	91908000	907540000	277290000	350060000	354270000	0	1704100000	573410000	291230000	797140000	3.1117	0.327743	0.580815	0.573038	--	0.511085	2.05856	1.00505	1.19935	4.98167e+08	0.7802	5.94105e+08	0.8275
111	KATDAEADVASLNR		1	1459.73	2;3	K	R	14	sp|P09493|TPM1_HUMAN	77	90	no	1.6179e-112	279.62	3	-0.67466	A8	0	0	0	0	0	0	0	95274000	0	0	0	0	0	0	0	0	0	0	0	--	--	--	--	--	--	--	--	--	95274000	--	0	--
112	ELTSELKENFIR	ELTSELKEN(de)FIR	1	1477.78	2;3	K	F	12	sp|P80188|NGAL_HUMAN	163	174	yes	2.6866e-112	287.41	35	-1.2285	A1;A10;A3;A4;A5;A9;B1;B10;B2;B3;B4;B5;B6;B7;B8	126230000	155100000	188720000	98542000	165640000	0	0	0	401550000	25617000	175440000	277990000	448350000	274480000	2973300	124920000	27121000	19700000	0	4.92759	0.884063	0.420921	0.359013	55.7091	--	--	--	--	189297000	0.5738	1.52955e+08	1.0109
113	FPTDQLTPDQER		0	1445.68	2	R	S	12	sp|P05164|PERM_HUMAN	237	248	yes	3.357e-112	280.55	75	-0.2243	A1;A10;A3;A4;A5;A6;A7;A8;A9;B1;B10;B2;B3;B4;B5;B6;B7;B9	28580000	10873000	62894000	24543000	69541000	184270000	129310000	36379000	206560000	13148000	88200000	38477000	103320000	63949000	916380	116080000	93994000	0	18968000	2.17371	0.123277	0.60873	0.38379	75.8866	1.58744	1.37573	--	10.8899	8.36611e+07	0.8661	5.96725e+07	0.7213
114	LLDEDHTGTVEFK		0	1502.73	2;3	R	E	13	sp|Q9UBG3|CRNN_HUMAN	60	72	yes	3.5229e-112	281.83	45	-0.99047	A1;A10;A3;A4;A5;A6;A7;A8;A9;B1;B2;B3;B4;B5;B6;B7	179010000	14597000	119220000	216350000	340340000	171820000	38162000	66478000	652040000	56578000	0	267080000	208410000	131720000	8368300	77966000	39698000	0	0	3.16395	--	0.572045	1.6425	40.6701	2.20378	0.961308	--	--	1.9978e+08	0.9861	1.12831e+08	0.8402
115	LQDEIQNMKEEMAR	LQDEIQN(de)M(ox)KEEM(ox)AR;LQDEIQNM(ox)KEEMAR;LQDEIQN(de)MKEEMAR	1	1733.81	2;3	R	H	14	sp|P08670|VIME_HUMAN	365	378	yes	3.7145e-112	280.21	51	-1.7285	A1;A10;A5;A6;A7;A8;A9;B1;B10;B2;B3;B4;B6;B7;B9	35839000	141120000	0	0	24090000	208030000	227840000	78794000	336330000	17266000	43841000	100970000	33805000	16447000	0	855800000	38308000	0	51232000	2.0757	3.2189	--	--	--	0.243082	5.94758	--	6.56484	1.50292e+08	0.7595	144708625	1.9939
116	LEYHQVIQQMEQK	LEYHQVIQQM(ox)EQK	0	1672.82	2;3	K	K	13	sp|P80303|NUCB2_HUMAN	387	399	yes	4.071e-112	329.15	14	-0.11072	A1;A4;A5;A7;A8;B1;B10;B8	87946000	0	0	122520000	49411000	0	30195000	36526000	0	118030000	70793000	0	0	0	0	0	0	21942000	0	0.745116	--	--	--	--	--	--	1.66466	--	65319600	0.5978	70255000	0.6839
117	QNQIAVDEIRER	(gl)QNQIAVDEIRER	1	1469.76	2;3	R	L	12	sp|P05164|PERM_HUMAN	560	571	yes	7.1184e-112	279.64	45	-1.8142	A10;A3;A6;A7;A8;A9;B10;B3;B5;B6;B7;B8	0	40175000	133850000	0	0	373000000	432700000	235960000	294830000	0	393320000	0	19941000	0	10498000	114930000	523810000	12373000	0	--	0.102143	6.7123	--	--	3.24545	0.826063	19.0706	--	251752500	0.5844	1.79145e+08	1.2492
118	VVESNFPNQEYTLGSEFQFYLHK	VVESNFPN(de)QEYTLGSEFQFYLHK	0	2775.32	2;3;4	R	I	23	sp|P23280|CAH6_HUMAN	273	295	yes	5.0709e-111	264.3	206	-3.2834	A1;A3;A4;A5;A6;A9;B1;B2;B3;B4;B5;B6;B7	6254200000	0	100960000	6822200000	3675400000	465400000	0	0	446360000	12015000000	0	2526300000	3272500000	2574500000	22125000	102590000	378070000	0	0	0.520533	--	0.030851	2.64991	166.12	4.5365	--	--	--	2.96075e+09	1.0355	2.98444e+09	1.4076
119	TPSAAYLWVGTGASEAEK		0	1836.89	2	K	T	18	sp|P06396|GELS_HUMAN	598	615	yes	2.3965e-109	259.7	27	-1.5083	A1;A4;A5;A6;A7;A9;B1;B10;B2;B3;B4;B5;B6;B9	65587000	0	0	95781000	169060000	399170000	260990000	0	497500000	0	146950000	224820000	227730000	160300000	765960	516320000	0	0	105010000	--	--	--	0.597511	220.716	0.773106	--	--	4.73764	2.48015e+08	0.6936	1.97414e+08	0.8129
120	HQGVMVGMGQKDSYVGDEAQSK	HQGVM(ox)VGM(ox)GQKDSYVGDEAQSK;HQGVM(ox)VGMGQKDSYVGDEAQSK	1	2350.07	3;4	R	R	22	sp|P63261|ACTG_HUMAN;sp|P60709|ACTB_HUMAN;sp|P68133|ACTS_HUMAN;sp|P68032|ACTC_HUMAN;sp|P63267|ACTH_HUMAN;sp|P62736|ACTA_HUMAN	40	61	no	4.3325e-109	255.41	102	-1.6317	A10;A3;A6;A7;A8;A9;B10;B6;B7;B8;B9	0	214550000	21038000	0	0	97927000	354590000	280570000	342050000	0	392730000	0	0	0	0	809260000	487140000	142650000	762680000	--	0.546304	--	--	--	0.121008	0.727902	1.96684	0.448484	2.18454e+08	0.6182	518892000	0.5297
121	TLNQPDSQLQLTTGNGLFLSEGLK	TLNQPDSQLQLTTGN(de)GLFLSEGLK	0	2573.33	2;3	R	L	24	sp|P01009|A1AT_HUMAN	126	149	yes	6.5486e-109	270.84	12	-0.75186	A5;A6;A9;B10;B2;B3;B6;B9	0	0	0	0	238170000	134360000	0	0	47110000	0	31584000	113930000	151580000	0	0	127750000	0	0	37470000	--	--	--	--	--	1.05174	--	--	1.25727	139880000	0.6838	92462800	0.5907
122	ALHFVISEYNKATEDEYYRR	ALHFVISEYN(de)KATEDEYYRR	2	2503.21	3;4;5	R	L	20	sp|P09228|CYTT_HUMAN	47	66	yes	1.1414e-103	275.85	61	-2.0362	A1;A10;A3;A6;A7;A8;A9;B10;B6;B7;B8;B9	68697000	886690000	419940000	0	0	265570000	278250000	450100000	782670000	0	376060000	0	0	0	0	2421400000	732580000	31965000	1851500000	--	2.35784	--	--	--	0.109676	0.379822	14.081	0.422722	4.50274e+08	0.6482	1082701000	0.9361
123	LHDVNSDGFLDEQELEALFTK	LHDVN(de)SDGFLDEQELEALFTK	0	2419.15	2;3	K	E	21	sp|P80303|NUCB2_HUMAN	252	272	yes	1.6745e-103	276.18	21	-2.5648	A1;A10;A3;A4;A5;A6;A7;A8;A9;B1;B10;B2;B3;B6;B7	53184000	111970000	145390000	637530000	148900000	135720000	194910000	235320000	222510000	308800000	168550000	34156000	65524000	0	0	276780000	418760000	0	0	0.172228	0.664313	2.21888	--	--	0.490353	0.465446	--	--	2.09493e+08	0.8119	212095000	0.7034
124	QGHFYGETAAVYVAVEERK	(gl)QGHFYGETAAVYVAVEERK	1	2153.05	2;3;4	K	A	19	sp|P01833|PIGR_HUMAN	548	566	yes	5.3749e-103	225.13	59	-0.74052	A10;A3;A6;A7;A8;A9;B10;B6;B7;B8;B9	0	1107200000	1761900000	0	0	1165200000	664440000	888100000	1349200000	0	1495300000	0	0	0	0	1102700000	1852600000	228530000	495690000	--	0.740453	--	--	--	1.05668	0.358653	3.88614	2.72186	1.15601e+09	0.3283	1034964000	0.6529
125	KGGETSEMYLIQPDSSVKPYR	KGGETSEM(ox)YLIQPDSSVKPYR	2	2384.17	2;3;4	R	V	21	sp|P02675|FIBB_HUMAN	247	267	yes	1.2556e-102	270.51	124	-1.5547	A1;A10;A3;A4;A5;A6;A7;A8;A9;B10;B2;B3;B4;B6;B7;B8;B9	324640000	215820000	501650000	119370000	347630000	610080000	1129900000	485210000	795600000	0	1070400000	118380000	353550000	184330000	0	1270700000	128920000	132470000	885290000	--	0.201626	1.41889	0.647589	--	0.480113	8.76435	3.66279	0.898689	5.03322e+08	0.6188	518005000	0.9243
126	FFESFGDLSTPDAVMGNPK	FFESFGDLSTPDAVM(ox)GNPK	0	2057.94	2	R	V	19	sp|P68871|HBB_HUMAN	42	60	yes	5.9048e-102	266.78	13	-1.386	A1;A5;A6;A7;B10;B3;B4;B6;B8;B9	102000000	0	0	0	289550000	114880000	111300000	0	0	0	138720000	0	263640000	60223000	0	173500000	0	107260000	361080000	--	--	--	--	--	0.662133	--	--	--	154432500	0.5843	184070500	0.6004
127	SQTSQAVTGGHTQIQAGSHTETVEQDR		0	2852.33	3;4	R	S	27	sp|Q9UBG3|CRNN_HUMAN	336	362	yes	1.589e-99	261.82	3	0.28286	A6;A7;A8;B8;B9	0	0	0	0	0	18374000	7016600	8560500	0	0	0	0	0	0	0	0	0	9927600	36079000	--	--	--	--	--	--	--	0.862293	--	1.1317e+07	0.5443	23003300	0.8039
128	VDNALQSGNSQESVTEQDSKDSTYSLSSTLTLSKADYEK		2	4224.97	4	K	H	39	sp|P01834|IGKC_HUMAN;sp|P0DOX7|IGK_HUMAN	150	188	no	3.2583e-99	233.24	22	-2.0945	A10;A6;A7;A8;B10;B6;B7;B8;B9	0	342950000	0	0	0	88738000	178780000	242930000	0	0	181950000	0	0	0	0	331070000	427670000	85575000	123050000	--	1.88486	--	--	--	0.268034	0.418033	2.8388	--	213349500	0.5019	229863000	0.63
129	RFPFIGEDDNDDGHPLHPSLNIPYGIR	RFPFIGEDDN(de)DDGHPLHPSLNIPYGIR	1	3090.49	3;4;5	R	N	27	sp|Q6MZM9|PRR27_HUMAN	19	45	yes	8.31e-99	252.11	19	-0.83771	A1;A4;A5;B1;B3	72813000	0	0	101030000	62875000	0	0	0	0	913920000	0	0	211800000	0	0	0	0	0	0	0.0796711	--	--	--	--	--	--	--	--	78906000	0.2509	562860000	0.8821
130	VIETLLMDTPSSYEAAMELFSPDQDMR	VIETLLMDTPSSYEAAMELFSPDQDM(ox)R	0	3088.41	2;3	R	E	27	sp|P11684|UTER_HUMAN	30	56	yes	9.8974e-99	260.29	8	-0.27482	A1;A6;B3	12644000	0	0	0	0	130280000	0	0	0	0	0	0	765790000	0	0	0	0	0	0	--	--	--	--	--	--	--	--	--	71462000	1.164	765790000	--
131	MTVADGTVYIAQQMHFHWGGASSEISGSEHTVDGIR	MTVADGTVYIAQQ(de)MHFHWGGASSEISGSEHTVDGIR;M(ox)TVADGTVYIAQQMHFHWGGASSEISGSEHTVDGIR	0	3873.78	3;4;5	R	H	36	sp|P23280|CAH6_HUMAN	97	132	yes	1.4818e-98	233.44	490	-2.0434	A1;A3;A4;A5;A6;A9;B1;B2;B3;B4;B5;B6	1512900000	0	104900000	2286500000	1306400000	409740000	0	0	517050000	2300600000	0	1904400000	1205400000	969020000	116900000	170600000	0	0	0	0.657611	--	0.0870251	2.3596	11.1754	2.40176	--	--	--	1022915000	0.8052	1.11115e+09	0.7995
132	VAPEEHPVLLTEAPLNPK		0	1953.06	2;3;4	R	A	18	sp|P63261|ACTG_HUMAN;sp|P60709|ACTB_HUMAN	96	113	yes	2.8486e-98	270.8	179	-0.7908	A1;A10;A3;A4;A5;A6;A7;A8;A9;B1;B10;B2;B3;B4;B5;B6;B7;B8;B9	1646200000	5542300000	5159800000	1381000000	2099500000	8104300000	6320500000	12855000000	22962000000	835800000	10099000000	732020000	3191800000	2364900000	26116000	11990000000	6792100000	2911400000	10515000000	1.96961	0.548797	1.61658	0.583957	80.3913	0.675922	0.930566	4.4154	2.18374	7.34118e+09	0.9382	4945813600	0.9125
133	DGDRFWWENPGVFTNEQK		1	2224	2;3	R	D	18	sp|P22079|PERL_HUMAN	641	658	yes	3.9426e-98	272.95	12	-1.6055	A1;A4;A5;B1;B2;B3;B4	70089000	0	0	196590000	101670000	0	0	0	0	147950000	0	131810000	130300000	141800000	0	0	0	0	0	0.473734	--	--	1.38639	--	--	--	--	--	122783000	0.5362	137965000	0.0608
134	GIVDQSQQAYQEAFEISK		0	2039.98	2;3	K	K	18	sp|P63104|1433Z_HUMAN	140	157	yes	5.3723e-98	323.66	26	-0.91706	A1;A4;A5;B1;B2;B3;B4	103240000	0	0	147510000	170420000	0	0	0	0	49339000	0	88894000	137000000	183880000	0	0	0	0	0	2.09246	--	--	0.802208	--	--	--	--	--	140390000	0.2433	114778250	0.5085
135	VSNGAGTMSVSLVADENPFAQGALK	VSN(de)GAGTMSVSLVADENPFAQGALK	0	2462.21	2;3	K	S	25	sp|P06396|GELS_HUMAN	303	327	yes	9.852e-98	262.36	5	-0.26108	A5;B2;B3;B4	0	0	0	0	93008000	0	0	0	0	0	0	142320000	142170000	29705000	0	0	0	0	0	--	--	--	--	--	--	--	--	--	93008000	--	1.04732e+08	0.6204
136	IIEGGIYDADLNDERVQR	IIEGGIYDADLN(de)DERVQR	1	2075.03	2;3	R	A	18	sp|P09228|CYTT_HUMAN	29	46	yes	1.0452e-97	288.52	51	-2.1572	A10;A8;A9;B10;B6;B7;B8;B9	0	738540000	0	0	0	0	0	209410000	473560000	0	117530000	0	0	0	0	437240000	228530000	79709000	740700000	--	6.28384	--	--	--	--	--	2.62718	0.639341	4.73837e+08	0.5583	320741800	0.8507
137	EGFGHLSPTGTTEFWLGNEK	EGFGHLSPTGTTEFWLGN(de)EK	0	2206.03	2;3	K	I	20	sp|P02679|FIBG_HUMAN	239	258	yes	1.2365e-96	233.97	28	-1.4612	A1;A3;A4;A5;A7;A8;B1;B10;B2;B3;B4;B6;B8;B9	292480000	0	94049000	58515000	233040000	0	165850000	69596000	0	44072000	163870000	139160000	305280000	66025000	0	198840000	0	23573000	96093000	6.63641	--	0.308075	0.886255	--	--	--	2.95236	--	152255000	0.6257	129614125	0.7181
138	RFDEILEASDGIMVAR		1	1820.91	2;3	R	G	16	sp|P14618|KPYM_HUMAN	279	294	yes	2.7073e-96	276.19	29	-0.87999	A1;A3;A4;A5;A6;A7;A8;A9;B1;B10;B2;B3;B4;B6;B7;B8;B9	73992000	0	46184000	88142000	73431000	89733000	57958000	214710000	397570000	44002000	219880000	13998000	115080000	106140000	0	232120000	171010000	29359000	184490000	1.68156	--	0.401321	0.830432	--	0.38658	0.338916	7.31326	2.15497	130215000	0.9211	1.24009e+08	0.6662
139	TELRPGETLNVNFLLR	TELRPGETLNVN(de)FLLR	1	1871.03	2;3	R	M	16	sp|P01024|CO3_HUMAN	463	478	yes	5.1882e-96	221.91	18	-2.7382	A1;A4;A5;A6;A7;A9;B2;B3;B4;B6	184450000	0	0	31439000	110170000	50292000	65224000	0	75669000	0	0	119890000	192640000	127010000	0	72071000	0	0	0	--	--	--	0.247532	--	0.697812	--	--	--	8.62073e+07	0.6368	127902750	0.3876
140	GHGAGGASILTFWDAR		0	1614.79	1;2;3	R	L	16	sp|P04745|AMY1_HUMAN;sp|P19961|AMY2B_HUMAN;sp|P04746|AMYP_HUMAN;CON__Q3MHH8	319	334	no	8.5721e-96	273.24	1035	-2.5061	A1;A10;A3;A4;A5;A6;A7;A8;A9;B1;B10;B2;B3;B4;B5;B6;B7;B8;B9	11943000000	8912600000	5135200000	20182000000	10394000000	10023000000	13885000000	15643000000	11582000000	15537000000	8725800000	19104000000	2950400000	20260000000	250240000	3254200000	11681000000	203650000	1712100000	0.768681	1.02141	1.74051	0.99615	41.5361	3.08002	1.18868	76.8132	6.76479	1.19666e+10	0.3583	8367839000	0.9355
141	NWGEGWGFMPSDR	NWGEGWGFM(ox)PSDR;N(de)WGEGWGFMPSDR;N(de)WGEGWGFM(ox)PSDR	0	1537.64	1;2	K	A	13	sp|P04745|AMY1_HUMAN;sp|P19961|AMY2B_HUMAN;CON__Q3MHH8	294	306	no	9.1105e-96	277.96	666	-2.4882	A1;A10;A3;A4;A5;A6;A7;A8;A9;B1;B10;B2;B3;B4;B5;B6;B7;B8;B9	12699000000	4852300000	2498200000	18671000000	14218000000	7614600000	9994700000	10248000000	7854400000	14287000000	5206800000	16214000000	5735400000	16625000000	77418000	4467400000	4944400000	1471500000	7539700000	0.88885	0.931916	0.435576	1.12307	183.652	1.70448	2.02142	6.96432	1.04174	9.85002e+09	0.4989	7656861800	0.7794
142	QVGSGVTTDQVQAEAK	(gl)QVGSGVTTDQVQAEAK	0	1616.8	2;3	K	E	16	sp|P01871|IGHM_HUMAN;sp|P0DOX6|IGM_HUMAN	154	169	no	1.8482e-95	267.67	124	-1.912	A1;A10;A3;A4;A5;A6;A7;A8;A9;B1;B10;B2;B3;B4;B5;B6;B7;B8;B9	1109300000	245660000	1929600000	242990000	408910000	446210000	2715700000	390970000	3749100000	510550000	1685900000	123860000	492140000	700210000	10351000	312700000	1121400000	140470000	208980000	2.17275	0.145714	3.92084	0.347024	39.5044	1.42696	2.42171	2.7833	17.94	1.24872e+09	1.0204	530656100	0.9839
143	DALSSVQESQVAQQAR		0	1715.84	2	K	G	16	sp|P02656|APOC3_HUMAN	45	60	yes	2.4703e-95	264.17	2	0.025676	A6;B9	0	0	0	0	0	23582000	0	0	0	0	0	0	0	0	0	0	0	0	29142000	--	--	--	--	--	--	--	--	--	23582000	--	29142000	--
144	VFDKDGNGYISAAELR	VFDKDGN(de)GYISAAELR	1	1753.86	2;3	R	H	16	sp|P0DP25|CALM3_HUMAN;sp|P0DP24|CALM2_HUMAN;sp|P0DP23|CALM1_HUMAN	92	107	yes	3.4463e-95	270.79	122	-0.55945	A1;A10;A3;A4;A5;A6;A7;A8;A9;B1;B10;B2;B3;B4;B5;B6;B7;B8;B9	302300000	1215100000	1146700000	198220000	458090000	1421600000	861130000	1418100000	2772900000	112570000	1071600000	383030000	476710000	513950000	3946400	3159800000	664080000	127370000	641800000	2.68544	1.13391	2.40545	0.38568	116.078	0.449902	1.29673	11.1337	4.3205	1.08824e+09	0.7218	715485640	1.2787
145	VVSVLTVVHQDWLNGK	VVSVLTVVHQDWLN(de)GK	0	1792.98	2;3	R	E	16	sp|P01859|IGHG2_HUMAN	181	196	yes	3.5937e-95	269.7	58	-0.63545	A1;A3;A4;A5;A6;A7;A8;A9;B1;B10;B2;B3;B4;B6	882870000	0	57484000	565550000	1499500000	309800000	238920000	133420000	433550000	241690000	188950000	672590000	2917100000	1151400000	0	88326000	0	0	0	3.6529	--	0.0197059	0.491185	--	3.50746	--	--	--	515136750	0.9243	876676000	1.2262
146	NNLEALEDFEKAAGAR	NN(de)LEALEDFEKAAGAR	1	1746.85	2;3	K	G	16	sp|P31025|LCN1_HUMAN	140	155	yes	3.9586e-95	266.74	37	-1.7429	A10;A3;A6;A7;A8;A9;B10;B6;B7;B8;B9	0	862960000	60305000	0	0	2366300000	2273000000	513980000	267080000	0	667040000	0	0	0	0	1137600000	1445200000	258540000	545060000	--	1.29372	--	--	--	2.08008	1.57279	1.98801	0.490001	1.05727e+09	0.9592	810688000	0.5869
147	TDGGTTDYAAPVKGR		1	1507.73	2;3	K	F	15	sp|A0A0B4J1V0|HV315_HUMAN	74	88	yes	4.3298e-95	272.94	16	-2.6369	A10;A8;B7;B8	0	83970000	0	0	0	0	0	12353000	0	0	0	0	0	0	0	0	15036000	16130000	0	--	--	--	--	--	--	--	0.76584	--	48161500	1.0515	15583000	0.0496
148	SVVGDALEFGNSWK	SVVGDALEFGN(de)SWK	0	1507.73	2;3	R	L	14	sp|Q9HC84|MUC5B_HUMAN	1043	1056	yes	1.0264e-94	275.84	121	-2.2355	A1;A10;A3;A4;A5;A6;A7;A8;A9;B1;B10;B2;B3;B4;B5;B6;B7;B8;B9	1127300000	926760000	1470600000	2047500000	2430600000	6135600000	3171900000	681280000	5304900000	2744700000	958660000	2710300000	1420500000	2882600000	2106100	6738100000	1792600000	144430000	382580000	0.410719	0.966724	1.03527	0.710296	1154.08	0.910583	1.76944	4.71703	13.8661	2.58849e+09	0.7531	1977657610	1.0084
149	LGAVDESLSEETQK		0	1504.73	2	R	A	14	sp|Q96HE7|ERO1A_HUMAN	137	150	yes	1.0264e-94	275.84	37	-0.77378	A1;A10;A3;A4;A5;A6;A7;A8;A9;B1;B10;B2;B3;B4;B5;B6;B7;B8;B9	25974000	51914000	84257000	23925000	26420000	49633000	94496000	100580000	279090000	10483000	33050000	17519000	19349000	47589000	1418100	193110000	156030000	20024000	39793000	2.47773	1.57077	4.35459	0.502742	18.6306	0.257019	0.605627	5.02297	7.01355	8.18099e+07	0.975	53836510	1.2194
150	NRPTSISWDGLDSGK		1	1631.79	2;3	K	L	15	sp|P30086|PEBP1_HUMAN	48	62	yes	1.1867e-94	276.71	41	-0.63398	A1;A10;A3;A4;A5;A6;A7;A8;A9;B10;B2;B3;B4;B6	53866000	39785000	300730000	58707000	117050000	79937000	71939000	161210000	294540000	0	0	99266000	116120000	120550000	0	153520000	0	0	0	--	--	2.58982	0.486993	--	0.520694	--	--	--	1.30863e+08	0.7748	122364000	0.1855
151	KDSGFQMNQLR	KDSGFQMN(de)QLR;KDSGFQM(ox)NQLR;KDSGFQM(ox)N(de)QLR	1	1322.64	2;3	K	G	11	sp|P02787|TRFE_HUMAN	122	132	yes	2.1196e-94	265.58	189	-4.4225	A1;A10;A3;A4;A5;A6;A7;A8;A9;B1;B10;B2;B3;B4;B5;B6;B7;B8;B9	238110000	246970000	317900000	162270000	445980000	395780000	836870000	312820000	161450000	61259000	1789600000	572520000	916640000	425750000	3517700	1172000000	574410000	2108900000	2416400000	3.88694	0.138003	0.34681	0.381139	126.782	0.337696	1.45692	0.148333	0.0668143	3.46461e+08	0.599	1004099670	0.844
152	HSTIFENLANK	HSTIFEN(de)LANK	0	1272.65	2;3	K	A	11	sp|P02787|TRFE_HUMAN	226	236	yes	2.1241e-94	305.55	86	-0.81048	A1;A10;A3;A4;A5;A6;A7;A8;A9;B1;B10;B2;B3;B4;B5;B6;B7;B8;B9	360550000	20958000	618920000	102510000	383810000	1096000000	653980000	57973000	1214500000	93680000	341260000	679070000	703050000	365710000	6130300	209420000	60356000	189310000	384520000	3.84874	0.0614136	0.880336	0.280304	62.6087	5.2335	10.8354	0.306233	3.15848	5.01022e+08	0.8698	303250630	0.7972
153	YVNKEIQNAVNGVK	YVNKEIQN(de)AVN(de)GVK;YVNKEIQNAVN(de)GVK	1	1574.84	2;3	K	Q	14	sp|P10909|CLUS_HUMAN	41	54	yes	2.8328e-94	275.76	59	-3.022	A10;A3;A5;A6;A7;A8;A9;B10;B3;B4;B6;B7;B8;B9	0	50044000	439080000	0	0	837140000	212160000	128050000	225830000	0	242920000	0	4144200	8198200	0	255940000	355440000	91494000	193360000	--	0.20601	105.95	--	--	3.27084	0.596894	1.39955	1.16793	315384000	0.9098	1.64499e+08	0.8129
154	NEEDDMVEMEEER	NEEDDM(ox)VEMEEER	0	1653.61	2;3	K	L	13	sp|P80303|NUCB2_HUMAN	282	294	yes	6.0633e-94	271.65	37	-0.65203	A1;A10;A3;A4;A5;A6;A8;A9;B1;B10;B2;B3;B4;B6;B7;B8	120310000	15293000	142340000	268510000	90733000	60485000	0	113380000	152890000	119070000	57436000	41058000	45616000	105300000	0	49098000	121310000	23595000	0	1.01041	0.266262	3.1204	2.54995	--	1.23192	--	4.80526	--	120492625	0.6198	70310375	0.55
155	SKEFQLFSSPHGK		1	1490.75	2;3;4	K	D	13	sp|P02787|TRFE_HUMAN	298	310	yes	1.6773e-93	269.04	149	-1.2227	A1;A10;A3;A4;A5;A6;A7;A8;B1;B10;B2;B3;B4;B6;B7;B8;B9	751280000	20827000	157190000	130920000	612260000	614030000	417920000	49568000	0	70791000	200010000	359160000	608980000	616820000	0	845350000	0	122150000	212940000	10.6126	0.10413	0.25812	0.21225	--	0.726362	--	0.405796	--	344249375	0.8417	379525125	0.7372
156	YLQEIYNSNNQK	YLQEIYNSN(de)NQK;YLQEIYN(de)SN(de)NQK;YLQEIYN(de)SN(de)N(de)QK	0	1512.72	2	R	I	12	sp|P02679|FIBG_HUMAN	135	146	yes	1.7061e-93	264.9	101	-4.3871	A1;A10;A3;A5;A6;A7;A8;A9;B10;B2;B3;B4;B6;B7;B8;B9	9961500	35584000	200430000	0	12365000	184640000	455800000	103370000	338780000	0	384320000	21477000	36577000	15314000	0	881130000	68803000	120920000	376490000	--	0.0925895	5.47967	--	--	0.209549	6.62471	0.854863	0.899838	1.67616e+08	0.9679	238128875	1.2634
157	SGNEDEFRNMVTR	SGNEDEFRN(de)M(ox)VTR;SGNEDEFRNM(ox)VTR;SGN(de)EDEFRNMVTR;SGN(de)EDEFRN(de)MVTR;SGN(de)EDEFRN(de)M(ox)VTR	1	1553.69	2;3	R	C	13	sp|P04745|AMY1_HUMAN;sp|P19961|AMY2B_HUMAN;sp|P04746|AMYP_HUMAN	88	100	no	3.1135e-93	265.72	1145	-4.0844	A1;A10;A3;A4;A5;A6;A7;A8;A9;B1;B10;B2;B3;B4;B5;B6;B7;B8;B9	1847000000	29614000000	9878300000	1832200000	1124200000	9390500000	31420000000	19295000000	13893000000	1074900000	20628000000	1333200000	309240000	2588800000	29546000	17847000000	34762000000	20774000000	29390000000	1.7183	1.43562	31.9438	0.707741	38.0491	0.526167	0.903861	0.928805	0.472712	13143800000	0.8793	12873668600	1.0358
158	DIQMTQSPSTLSASVGDR	DIQM(ox)TQSPSTLSASVGDR	0	1891.89	2;3	-	V	18	sp|P0DOX7|IGK_HUMAN	1	18	yes	6.5409e-93	278.65	190	-3.2255	A1;A10;A3;A4;A5;A6;A7;A8;A9;B1;B10;B2;B3;B4;B6;B7;B8;B9	464480000	140330000	897650000	329640000	502540000	1331800000	574500000	245020000	1610000000	337550000	908040000	373670000	857940000	779510000	0	797200000	378800000	69180000	127430000	1.37603	0.154542	1.04629	0.422881	--	1.6706	1.51663	3.54178	12.6344	6.77329e+08	0.7436	5.14369e+08	0.6302
159	PGSAPTTVIYEDNQRPSGVPDR	PGSAPTTVIYEDN(de)QRPSGVPDR	1	2355.15	3	R	F	22	sp|P01721|LV657_HUMAN	60	81	yes	2.4065e-92	215.58	11	-1.1136	A1;A5;A6;B1;B2;B3;B4	101560000	0	0	0	16505000	19310000	0	0	0	12881000	0	12623000	68274000	27310000	0	0	0	0	0	7.88448	--	--	--	--	--	--	--	--	4.57917e+07	1.0552	30272000	0.8671
160	AKLDSLQDIGMDHQALLK	AKLDSLQDIGM(ox)DHQALLK	1	1995.05	2;3;4	K	Q	18	sp|P80303|NUCB2_HUMAN	120	137	yes	1.0614e-91	271.43	103	-0.93796	A1;A10;A3;A4;A5;A6;A7;A8;A9;B1;B10;B2;B3;B4;B6;B7;B8;B9	320160000	572920000	1199000000	893500000	208480000	838450000	623300000	1621500000	1256600000	515160000	1274400000	61236000	263580000	112740000	0	133660000	3259700000	839090000	378600000	0.621477	0.449561	4.5489	7.92531	--	6.27301	0.191214	1.93245	3.31907	8.37101e+08	0.5512	7.59796e+08	1.3382
161	KAEEEHLGILGPQLHADVGDKVK		2	2482.32	3;4;5	R	I	23	sp|P00450|CERU_HUMAN	799	821	yes	2.7002e-91	258.1	95	-0.30319	A1;A10;A3;A5;A6;A7;A8;A9;B1;B10;B2;B3;B4;B6;B7;B8;B9	109630000	107100000	254230000	0	60212000	298030000	679600000	144070000	719460000	11762000	565790000	60536000	78976000	34180000	0	932160000	158030000	288360000	390300000	9.32069	0.189293	3.21908	--	--	0.31972	4.30045	0.499619	1.84335	296541500	0.8806	2.8001e+08	1.0972
162	HQGVMVGMGQKDSYVGDEAQSKR	HQGVMVGM(ox)GQKDSYVGDEAQSKR;HQGVM(ox)VGM(ox)GQKDSYVGDEAQSKR	2	2506.17	3;4;5	R	G	23	sp|P63261|ACTG_HUMAN;sp|P60709|ACTB_HUMAN;sp|P68133|ACTS_HUMAN;sp|P68032|ACTC_HUMAN;sp|P63267|ACTH_HUMAN;sp|P62736|ACTA_HUMAN	40	62	no	3.8874e-91	251.51	145	-2.7101	A10;A3;A6;A7;A8;A9;B10;B6;B7;B8;B9	0	279390000	28288000	0	0	83704000	412770000	333270000	281920000	0	651530000	0	0	0	0	1525600000	826930000	471060000	1368400000	--	0.428821	--	--	--	0.0548663	0.49916	0.707489	0.206022	236557000	0.63	968704000	0.4726
163	AQPVQVAEGSEPDGFWEALGGK		0	2271.08	2;3	R	A	22	sp|P06396|GELS_HUMAN	627	648	yes	9.432e-91	260.49	23	-1.7836	A1;A10;A4;A5;A6;A7;A8;A9;B10;B2;B3;B4;B6;B7	44747000	211180000	0	50374000	141290000	106240000	51428000	77504000	139580000	0	49963000	242550000	233400000	131550000	0	413600000	0	0	0	--	4.22673	--	0.382927	--	0.256867	--	--	--	102792875	0.5695	214212600	0.6381
164	LDQGNLHTSVSSAQGQDAAQSEEK		0	2499.15	2;3	R	R	24	sp|Q9UBG3|CRNN_HUMAN	455	478	yes	1.5262e-89	257.93	21	-0.67616	A1;A10;A3;A4;A5;A6;A7;A8;A9;B1;B4;B7;B8	23372000	24074000	126800000	34538000	19726000	154740000	43460000	125860000	130630000	21277000	0	0	0	15297000	0	0	194250000	24983000	0	1.09846	--	--	2.25783	--	--	0.223732	5.03783	--	7.59111e+07	0.7461	63951750	1.3597
165	LHEWTKPENLDFIEVNVSLPR		1	2535.31	3;4	K	F	21	sp|P30740|ILEU_HUMAN	255	275	yes	7.0526e-86	254.73	15	-1.3114	A1;A4;A5;A6;A7;A9;B1;B2;B3;B4;B6	119120000	0	0	79823000	196360000	61188000	99419000	0	563880000	22955000	0	274970000	217210000	181370000	0	263840000	0	0	0	5.18928	--	--	0.440111	--	0.231913	--	--	--	1.86632e+08	1.0215	192069000	0.5295
166	HSASDDYFIPSQAFLEAER		0	2182	2;3	R	A	19	sp|Q14515|SPRL1_HUMAN	355	373	yes	7.5582e-86	263.59	10	-0.74381	A3;A4;B1;B10;B6;B7;B8;B9	0	0	40475000	13053000	0	0	0	0	0	41894000	60257000	0	0	0	0	123340000	242730000	179150000	148520000	--	--	--	--	--	--	--	--	--	26764000	0.7245	132648500	0.5651
167	ASGVPDRFSGSGSGTDFTLK		1	1984.95	2;3	R	I	20	sp|P01615|KVD28_HUMAN;sp|A0A075B6P5|KV228_HUMAN;sp|P01614|KVD40_HUMAN;sp|A0A087WW87|KV240_HUMAN	80	99	yes	1.6998e-85	263.2	119	-0.77764	A10;A3;A6;A7;A8;A9;B10;B6;B7;B8;B9	0	1084000000	1596300000	0	0	1896700000	1621100000	1776400000	5436500000	0	2336500000	0	0	0	0	3501200000	1564700000	465930000	645610000	--	0.463942	--	--	--	0.541729	1.03605	3.81259	8.42072	2.23517e+09	0.7126	1702788000	0.7372
168	AREQTFGGVNYFFDVEVGR	AREQTFGGVN(de)YFFDVEVGR	1	2190.05	2;3	R	T	19	sp|P01036|CYTS_HUMAN	73	91	yes	2.5174e-85	313.51	83	-2.2881	A1;A10;A3;A5;A6;A7;A8;A9;B10;B2;B3;B4;B5;B6;B7;B8;B9	36056000	129130000	225780000	0	28766000	453510000	115280000	35482000	888970000	0	230420000	23923000	105360000	40177000	4433500	2616700000	608870000	10680000	7942400	--	0.560411	2.14294	--	6.48833	0.173314	0.189334	3.32228	111.927	239121750	1.2474	4.0539e+08	2.1013
169	IGEHTPSALAIMENANVLAR	IGEHTPSALAIMEN(de)ANVLAR;IGEHTPSALAIM(ox)ENANVLAR;IGEHTPSALAIM(ox)EN(de)ANVLAR	0	2106.09	2;3	K	Y	20	sp|P04075|ALDOA_HUMAN	154	173	yes	3.2693e-85	210.56	53	-2.2791	A1;A10;A3;A4;A5;A6;A7;A8;A9;B1;B10;B2;B3;B4;B6;B7;B9	251090000	646790000	104960000	161060000	433780000	96818000	198960000	442090000	1029100000	67650000	215150000	364130000	462820000	366200000	0	593400000	494880000	0	260370000	3.7116	3.00623	0.226784	0.439814	--	0.163158	0.402037	--	3.95245	3.7385e+08	0.8201	353075000	0.4779
170	VYDPKNEEDDMVEMEEERLR	VYDPKNEEDDMVEM(ox)EEERLR;VYDPKNEEDDM(ox)VEM(ox)EEERLR	2	2525.11	3;4	K	M	20	sp|P80303|NUCB2_HUMAN	277	296	yes	3.3855e-85	209.45	35	-1.8174	A10;A3;A6;A7;A8;A9;B10;B6;B7;B8;B9	0	98636000	376240000	0	0	125820000	328790000	776190000	387060000	0	652990000	0	0	0	0	1050000000	3638300000	651330000	176500000	--	0.151053	--	--	--	0.119829	0.0903691	1.1917	2.19297	3.48789e+08	0.6994	1233824000	1.1179
171	DLYANTVLSGGTTMYPGIADR	DLYANTVLSGGTTM(ox)YPGIADR;DLYAN(de)TVLSGGTTMYPGIADR	0	2214.06	2;3	K	M	21	sp|P63261|ACTG_HUMAN;sp|P60709|ACTB_HUMAN	292	312	yes	4.135e-85	251.28	47	-3.3888	A1;A4;A5;A8;A9;B1;B2;B3;B4;B9	237080000	0	0	201060000	458400000	0	0	0	497750000	65378000	0	164930000	611870000	345920000	0	0	0	0	98835000	3.6263	--	--	0.581233	--	--	--	--	5.03617	348572500	0.4335	257386600	0.8775
172	TYGADLASVDFQHASEDAR		0	2051.92	2;3	K	K	19	sp|P30740|ILEU_HUMAN	111	129	yes	4.4971e-85	312.78	66	-1.2672	A1;A10;A3;A4;A5;A6;A7;A8;A9;B1;B10;B2;B3;B4;B5;B6;B7;B8;B9	489100000	872490000	1120600000	505480000	985230000	779260000	997230000	1457600000	3132900000	248520000	613690000	891740000	953960000	637790000	2955500	2706200000	1128000000	115550000	407250000	1.96805	1.42171	1.17468	0.792549	333.355	0.287954	0.884069	12.6145	7.69282	1.14888e+09	0.698	770565550	1.0041
173	DQQEAALVDMVNDGVEDLR	DQQEAALVDMVN(de)DGVEDLR;DQQEAALVDM(ox)VNDGVEDLR	0	2115.97	2;3	K	C	19	sp|P09211|GSTP1_HUMAN	83	101	yes	5.1013e-85	316.76	22	-2.3045	A1;A4;A5;B1;B2;B3;B4	85378000	0	0	150260000	149660000	0	0	0	0	76797000	0	174560000	205580000	205600000	0	0	0	0	0	1.11174	--	--	0.730837	--	--	--	--	--	1.28433e+08	0.2903	165634250	0.3683
174	LAKVDATEESDLAQQYGVR		1	2092.04	2;3	R	G	19	sp|P07237|PDIA1_HUMAN	79	97	yes	6.648e-85	294.97	32	-2.6672	A10;A3;A6;A7;A8;A9;B10;B6;B7;B8;B9	0	86370000	50187000	0	0	0	120300000	147180000	160090000	0	54371000	0	0	0	0	427830000	160910000	88684000	202170000	--	1.58853	--	--	--	--	0.747623	1.6596	0.791858	112825400	0.3987	186793000	0.7857
175	VQWKVDNALQSGNSQESVTEQDSKDSTYSLSSTLTLSK	VQWKVDNALQ(de)SGNSQESVTEQDSKDSTYSLSSTLTLSK	2	4160	3;4	K	A	38	sp|P01834|IGKC_HUMAN;sp|P0DOX7|IGK_HUMAN	146	183	no	2.0881e-84	210.58	35	-3.4775	A10;A6;A7;A8;B10;B6;B7;B9	0	809620000	0	0	0	497270000	188010000	940390000	0	0	375240000	0	0	0	0	763430000	227110000	0	129230000	--	2.15761	--	--	--	0.651363	0.827837	--	--	608822500	0.5528	373752500	0.7459
176	ILATPPQEDAPSVDIANIR		0	2019.06	2;3	K	M	19	sp|P29401|TKT_HUMAN	284	302	yes	2.4347e-84	251.24	57	-0.40051	A1;A10;A3;A4;A5;A6;A7;A8;A9;B1;B10;B2;B3;B4;B6;B7;B8;B9	340140000	609010000	143190000	140410000	437710000	258210000	257170000	385130000	1181700000	49067000	333820000	372490000	267210000	113530000	0	798830000	477790000	126280000	472130000	6.93215	1.82437	0.535871	1.23677	--	0.323235	0.538249	3.04981	2.50291	4.16963e+08	0.7731	3.34572e+08	0.6967
177	SVRPNDEVTAVLAVQTELK	SVRPN(de)DEVTAVLAVQTELK	1	2068.12	2;3;4	K	E	19	sp|P12273|PIP_HUMAN	45	63	yes	4.7176e-84	259.68	597	-2.8532	A1;A10;A3;A4;A5;A6;A7;A8;A9;B1;B10;B2;B3;B4;B5;B6;B7;B8;B9	6337800000	1221800000	11312000000	12204000000	8004800000	4277700000	493050000	704600000	7527200000	14423000000	3259900000	4814800000	6074400000	4707000000	34871000	1217000000	3789900000	801130000	1505300000	0.439423	0.374797	1.86224	2.59273	229.555	3.51495	0.130096	0.879508	5.00047	5.78699e+09	0.7653	4062730100	1.0201
178	SAVTALWGKVNVDEVGGEALGR		1	2227.16	2;3	K	L	22	sp|P68871|HBB_HUMAN	10	31	yes	1.593e-83	222.57	3	-0.99063	B8;B9	0	0	0	0	0	0	0	0	0	0	0	0	0	0	0	0	0	269470000	393610000	--	--	--	--	--	--	--	--	--	0	--	331540000	0.2648
179	WSSWYNGHRPEPGLGGGDFETFENLR	WSSWYN(de)GHRPEPGLGGGDFETFENLR	1	3007.36	3;4	R	Q	26	sp|Q9HC84|MUC5B_HUMAN	1340	1365	yes	9.3607e-83	248.58	98	-0.85066	A1;A10;A3;A4;A5;A6;A7;A8;A9;B1;B10;B2;B3;B4;B6;B7;B8;B9	633230000	197320000	3010700000	1780500000	2582300000	1840900000	2061900000	308060000	1036000000	2511900000	1104200000	2585100000	1451800000	1971300000	0	3389400000	1440300000	14018000	133280000	0.252092	0.1787	2.07377	0.903211	--	0.543134	1.43158	21.976	7.77311	1.49455e+09	0.6711	1.62237e+09	0.6925
180	MLLADQGQSWKEEVVTVETWQEGSLK		1	2990.47	2;3	R	A	26	sp|P09211|GSTP1_HUMAN	20	45	yes	5.1819e-82	243.27	16	-1.1728	A1;A3;A4;A5;A6;A7;A8;A9;B1;B2;B3;B4;B6;B7	195720000	0	51118000	217640000	311520000	161230000	73914000	122310000	295420000	124260000	0	392540000	287210000	442430000	0	319440000	169940000	0	0	1.57508	--	0.177981	0.49192	--	0.504727	0.434942	--	--	178609000	0.5346	2.89303e+08	0.4276
181	LDQGNLHTSVSSAQGQDAAQSEEKR		1	2655.25	3;4	R	G	25	sp|Q9UBG3|CRNN_HUMAN	455	479	yes	7.0489e-82	243.27	27	-1.5843	A1;A10;A3;A4;A5;A6;A7;A8;A9;B1;B7;B8;B9	22685000	41523000	167250000	26297000	19995000	121180000	104600000	141500000	144230000	4666900	0	0	0	0	0	0	282050000	17514000	48495000	4.86083	--	--	--	--	--	0.370856	8.07925	2.97412	8.76956e+07	0.6811	88181475	1.4805
182	ILENEKDLEEAEEYKEAR		2	2207.06	3;4	R	L	18	sp|O75347|TBCA_HUMAN	81	98	yes	1.063e-81	218.37	24	-1.7326	A1;A10;A3;A4;A5;A6;A8;A9;B3;B4;B6;B7;B9	14574000	88055000	78417000	15808000	22178000	54780000	0	118300000	319060000	0	0	0	22764000	24104000	0	167350000	112280000	0	113550000	--	--	3.44478	0.655825	--	0.327338	--	--	2.80986	88896500	1.1284	88009600	0.7159
183	DIILDNPTLTLEVLNEAR		0	2038.09	2	R	V	18	sp|Q08188|TGM3_HUMAN	589	606	yes	2.5721e-81	260.08	8	-3.4051	A1;A4;A5;B1;B2;B3;B4;B6	19176000	0	0	27671000	48156000	0	0	0	0	32913000	0	20979000	35735000	120240000	0	69350000	0	0	0	0.582627	--	--	0.230131	--	--	--	--	--	3.16677e+07	0.4704	55843400	0.7205
184	VENQENVSNLVIEDTELK		0	2072.03	2;3	R	Q	18	sp|Q01518|CAP1_HUMAN	331	348	yes	7.5443e-81	252.52	15	-1.156	A1;A4;A5;A9;B1;B2;B3;B4	72388000	0	0	39417000	111140000	0	0	0	110640000	5583200	0	46009000	118880000	65518000	0	0	0	0	0	12.9653	--	--	0.601621	--	--	--	--	--	83396250	0.4135	58997550	0.798
185	DSGRDYVSQFEGSALGK		1	1814.84	2;3	K	Q	17	sp|P02647|APOA1_HUMAN	48	64	yes	1.0506e-80	260.15	37	-0.70941	A1;A10;A3;A4;A5;A6;A7;A8;A9;B1;B10;B2;B3;B4;B6;B7;B8;B9	102380000	406700000	360070000	45788000	61872000	2032300000	1942300000	366440000	626510000	31240000	346670000	236800000	170930000	40967000	0	1688400000	89495000	675580000	931530000	3.27721	1.17316	2.10653	1.11768	--	1.20368	21.7029	0.542408	0.67256	6.60484e+08	1.1746	4.67957e+08	1.1754
186	GEAGGQAEAEGDAPGPR		0	1567.69	2;3	R	G	17	sp|Q99674|CGRE1_HUMAN	240	256	yes	1.5378e-80	252.96	19	-0.1745	A10;A3;A5;A8;A9;B1;B10;B2;B3;B4;B7;B8;B9	0	9538200	1707300	0	3795800	0	0	822700	0	2854200	1133200	2312900	2215400	4482000	0	0	0	3501300	6387200	--	8.41705	0.770651	--	--	--	--	0.23497	--	3966000	0.988	3.26946e+06	0.5299
187	IIPGGIYNADLNDEWVQR	IIPGGIYNADLN(de)DEWVQR	0	2072.03	2;3	R	A	18	sp|P01037|CYTN_HUMAN	29	46	yes	2.1452e-80	250.51	323	-4.3859	A1;A10;A3;A4;A5;A6;A7;A8;A9;B1;B10;B2;B3;B4;B5;B6;B7;B8;B9	35080000000	427700000	9759900000	25686000000	28461000000	11628000000	1677800000	0	34712000000	41319000000	10180000000	23124000000	22120000000	19985000000	75178000	12064000000	13788000000	4736200000	5482900000	0.849004	0.0420138	0.441225	1.28526	378.581	0.963859	0.121686	--	6.33096	18429050000	0.7733	15287427800	0.7817
188	TELETAMGMIIDVFSR	(ac)TELETAMGM(ox)IIDVFSR;(ac)TELETAMGMIIDVFSR	0	1811.88	2	M	Y	16	sp|P25815|S100P_HUMAN	2	17	yes	6.8255e-80	262	26	-1.8476	A1;A4;A5;A6;A8;A9;B1;B10;B2;B3;B4;B6	46825000	0	0	20074000	45885000	0	0	8387300	161280000	6032200	17987000	35286000	16265000	51410000	0	121970000	0	0	0	7.76251	--	--	0.390469	--	--	--	--	--	56490260	1.0778	41491700	1.0259
189	ASEHILLATSHTLFLR		0	1807.99	2;3;4	R	E	16	sp|P22079|PERL_HUMAN	373	388	yes	3.0698e-79	248.32	87	-0.99697	A1;A10;A3;A4;A5;A6;A7;A8;A9;B1;B10;B2;B3;B4;B5;B6;B7;B9	811540000	67366000	1326100000	1810600000	1004300000	627380000	421890000	543800000	1441000000	1603100000	824360000	702330000	656690000	1398900000	1284300	981480000	714960000	0	206370000	0.506232	0.0817192	2.01937	1.2943	781.982	0.639218	0.590089	--	6.9826	8.94886e+08	0.6178	7.87719e+08	0.6447
190	SNLDEDIIAEENIVSR		0	1815.88	2;3	R	S	16	sp|P01024|CO3_HUMAN	749	764	yes	3.6318e-79	261.63	13	-0.36525	A1;A4;A5;A6;A7;B10;B2;B3;B4;B6;B8;B9	111600000	0	0	52705000	105480000	149640000	278420000	0	0	0	210390000	103930000	134310000	67134000	0	144250000	0	300500000	608520000	--	--	--	0.785072	--	1.03737	--	--	--	139569000	0.6087	2.24148e+08	0.8293
191	ALTGHLEEVVLALLK		0	1604.95	2;3	K	T	15	sp|P04083|ANXA1_HUMAN	99	113	yes	6.6479e-79	259.55	21	-0.51164	A1;A3;A4;A5;A6;A7;A9;B1;B2;B3;B4;B6	37670000	0	99316000	70233000	148410000	223720000	161980000	0	120770000	94657000	0	66026000	207310000	76650000	0	264800000	0	0	0	0.397963	--	0.47907	0.916282	--	0.844864	--	--	--	123157000	0.5021	141888600	0.6267
192	HIAEEADRKYEEVAR		2	1814.89	3;4	K	K	15	sp|P06753|TPM3_HUMAN;sp|P67936|TPM4_HUMAN	154	168	no	6.673e-79	214.65	18	-0.83858	A10;A3;A6;A7;A8;B10;B6;B7;B8;B9	0	35067000	17735000	0	0	21657000	74827000	42954000	0	0	89165000	0	0	0	0	143010000	166460000	18892000	136510000	--	0.393282	--	--	--	0.151437	0.449519	2.27366	--	38448000	0.5911	110807400	0.5284
193	GATASQLEEVFHSEK		0	1631.78	2;3	R	E	15	sp|Q9UIV8|SPB13_HUMAN	47	61	yes	6.9404e-79	262.11	13	0.02665	A1;A3;A4;A5;A9;B1;B2;B3;B4;B5	33046000	0	62136000	93811000	68287000	0	0	0	112070000	30651000	0	47805000	20640000	34850000	3310700	0	0	0	0	1.07814	--	3.01047	2.69185	20.6262	--	--	--	--	73870000	0.4113	27451340	0.6064
194	QKAQEAEKLLNNVISK	(gl)QKAQEAEKLLNNVISK;QKAQEAEKLLN(de)NVISK	2	1812.01	2;3;4	K	L	16	sp|Q96DR5|BPIA2_HUMAN	76	91	yes	8.5216e-79	261.02	64	-3.1742	A10;A3;A6;A7;A8;A9;B10;B6;B7;B8;B9	0	181670000	577770000	0	0	235310000	129280000	171670000	241380000	0	340150000	0	0	0	0	125610000	1687400000	237690000	245540000	--	0.534088	--	--	--	1.87334	0.0766149	0.722243	0.983058	256180000	0.6363	527278000	1.2384
195	FSGSGSGTDFTLTISR		0	1631.78	2;3	R	L	16	sp|P01619|KV320_HUMAN;sp|A0A0C4DH25|KVD20_HUMAN	83	98	no	1.6084e-78	253.54	61	-1.3331	A1;A10;A3;A4;A5;A6;A7;A8;A9;B1;B10;B2;B3;B4;B5;B6;B7;B8;B9	1042700000	95353000	157620000	774320000	1171800000	431730000	246190000	191560000	254560000	459380000	211130000	550800000	1438500000	1844600000	1312400	181920000	136120000	0	54433000	2.2698	0.451632	0.109572	0.419777	892.868	2.37319	1.80862	--	4.67657	4.85093e+08	0.8388	5.42022e+08	1.21
196	SYELPDGQVITIGNER	SYELPDGQVITIGN(de)ER	0	1789.88	2;3	K	F	16	sp|P63261|ACTG_HUMAN;sp|P60709|ACTB_HUMAN;sp|Q562R1|ACTBL_HUMAN;sp|Q9BYX7|ACTBM_HUMAN;sp|P68133|ACTS_HUMAN;sp|P68032|ACTC_HUMAN;sp|P63267|ACTH_HUMAN;sp|P62736|ACTA_HUMAN;sp|Q6S8J3|POTEE_HUMAN;sp|A5A3E0|POTEF_HUMAN	239	254	no	1.6266e-78	253.42	142	-1.6162	A1;A10;A3;A4;A5;A6;A7;A8;A9;B1;B10;B2;B3;B4;B5;B6;B7;B8;B9	1538400000	348260000	1296100000	1048000000	2106400000	2494100000	2589700000	3572200000	713130000	373230000	2406000000	675630000	2190100000	1586400000	1563700	3496900000	1928300000	528990000	4828900000	4.12186	0.144746	0.591799	0.660615	1347.06	0.713232	1.343	6.75287	0.14768	1.74514e+09	0.5903	1801601370	0.8435
197	SVTEQGAELSNEER	SVTEQGAELSN(de)EER	0	1547.71	2;3	K	N	14	sp|P63104|1433Z_HUMAN	28	41	yes	2.5971e-78	310.27	93	-0.54901	A1;A10;A3;A4;A5;A6;A7;A8;A9;B1;B10;B2;B3;B4;B5;B6;B7;B8;B9	86466000	93740000	480380000	82766000	122010000	394540000	380670000	509590000	2792000000	26692000	388000000	39244000	63903000	180120000	13243000	1540000000	455250000	111950000	327870000	3.2394	0.241598	7.51733	0.459505	9.21317	0.256195	0.836178	4.55194	8.51557	5.49129e+08	1.5653	314627200	1.4598
198	KSASDLTWDNLK		1	1376.69	2;3	K	G	12	sp|P02787|TRFE_HUMAN	453	464	yes	2.8577e-78	261.75	61	-1.5311	A1;A10;A3;A4;A5;A6;A7;A8;A9;B1;B10;B2;B3;B4;B5;B6;B8;B9	271720000	145520000	534230000	80298000	206950000	778010000	1296100000	83918000	1941700000	29582000	424370000	288960000	377420000	92948000	2021400	3439900000	0	477600000	833150000	9.18532	0.342908	1.41548	0.863902	102.38	0.226172	--	0.175708	2.33055	5.93161e+08	1.087	6.62883e+08	1.6192
199	IVGYLNEEGVLDQNR	IVGYLN(de)EEGVLDQNR	0	1717.86	2;3	K	S	15	sp|P22079|PERL_HUMAN	199	213	yes	3.5084e-78	254.53	26	-1.4589	A1;A3;A4;A5;A8;A9;B1;B10;B2;B3;B4;B5;B6;B7;B8	32411000	0	105080000	123670000	72676000	0	0	0	168210000	72723000	81637000	40226000	67906000	52945000	217770	134620000	265560000	42445000	0	0.445677	--	1.54743	2.33582	333.728	--	--	--	--	100409400	0.5115	8.42533e+07	0.915
200	YLWAAHTSTLADNIK	YLWAAHTSTLADN(de)IK	0	1702.87	2;3	K	S	15	sp|Q6P5S2|LEG1H_HUMAN	206	220	yes	3.6678e-78	298.31	142	-2.3139	A1;A10;A3;A4;A5;A6;A7;A8;A9;B1;B10;B2;B3;B4;B5;B6;B7;B8;B9	1776900000	896450000	5620800000	3551400000	3072600000	2563100000	824870000	942280000	5398500000	2616500000	2448100000	3894600000	2714900000	1331300000	32162000	1714700000	2133100000	241120000	477930000	0.679113	0.366182	2.07035	2.66762	95.5351	1.49478	0.3867	3.90793	11.2956	2.73854e+09	0.6757	1760441200	0.7069
201	SIYGEKFEDENFILK	SIYGEKFEDEN(de)FILK	1	1830.9	2;3	K	H	15	sp|P62937|PPIA_HUMAN	77	91	yes	4.4023e-78	257.95	47	-1.8712	A1;A10;A3;A4;A5;A6;A7;A8;A9;B1;B10;B2;B3;B4;B5;B6;B7;B8;B9	305640000	682850000	877020000	108130000	208270000	864940000	636660000	1498400000	3140000000	119840000	755600000	624340000	468870000	281390000	1344200	2512500000	951410000	330020000	763750000	2.5504	0.903719	1.8705	0.384271	154.94	0.344255	0.669175	4.54033	4.11129	9.24657e+08	1.0078	680906420	1.044
202	VSDATGQMNLTK	VSDATGQMN(de)LTK;VSDATGQM(ox)NLTK	0	1263.61	2	K	V	12	sp|P40121|CAPG_HUMAN	254	265	yes	4.4289e-78	261.16	52	-1.4529	A1;A10;A3;A4;A5;A6;A7;A8;A9;B1;B10;B2;B3;B4;B5;B6;B7;B8;B9	11714000	85013000	60362000	22872000	29311000	115610000	164430000	103220000	230480000	5541200	86995000	45733000	44476000	39865000	969030	515600000	80771000	17751000	65574000	2.11398	0.977217	1.35718	0.573736	30.2478	0.224224	2.03576	5.81488	3.51481	9.14458e+07	0.7858	90327523	1.6857
203	RFNTANDDNVTQVR	RFNTAN(de)DDNVTQVR	1	1648.79	2;3	R	A	14	sp|P04040|CATA_HUMAN	431	444	yes	4.7226e-78	217.88	42	-0.5061	A1;A10;A3;A4;A5;A6;A7;A8;A9;B1;B10;B2;B3;B4;B6;B7;B8;B9	11393000	69133000	36560000	2874500	22201000	34117000	106520000	37815000	54822000	1187300	81366000	18422000	37669000	28314000	0	100710000	40027000	15013000	57689000	9.59572	0.849655	0.970559	0.101522	--	0.338765	2.6612	2.51882	0.950302	4.17151e+07	0.7596	4.22664e+07	0.7667
204	LKPLLNTMIQSNYNR	LKPLLNTMIQSN(de)YNR;LKPLLNTM(ox)IQSNYNR;LKPLLN(de)TMIQSN(de)YNR	1	1803.97	2;3	R	G	15	sp|P20061|TCO1_HUMAN	36	50	yes	5.5997e-78	256.31	157	-1.3689	A1;A10;A3;A4;A5;A6;A7;A8;A9;B1;B10;B2;B3;B4;B5;B6;B7;B8;B9	637290000	213020000	2002500000	1185800000	832860000	923860000	249330000	312360000	1595500000	779970000	916950000	1284300000	807410000	610160000	2764900	869670000	517570000	58602000	63260000	0.81707	0.232314	2.48015	1.94342	301.226	1.06231	0.481732	5.33019	25.2213	8.83613e+08	0.7037	591065690	0.7268
205	HYGPGWVSMANAGK	HYGPGWVSMAN(de)AGK	0	1473.68	2;3	K	D	14	sp|P23284|PPIB_HUMAN	132	145	yes	1.1905e-77	257.8	10	-1.5554	A4;A5;B1;B3;B4	0	0	0	90147000	17108000	0	0	0	0	11842000	0	0	14393000	10813000	0	0	0	0	0	--	--	--	8.33691	--	--	--	--	--	53627500	0.9631	1.23493e+07	0.1492
206	TFHFNTVEEVHSR	TFHFN(de)TVEEVHSR	0	1601.76	2;3;4	K	F	13	sp|P30740|ILEU_HUMAN	57	69	yes	1.3319e-77	260.33	206	-1.0563	A1;A10;A3;A4;A5;A6;A7;A8;A9;B1;B10;B2;B3;B4;B5;B6;B7;B8;B9	375470000	662070000	1591400000	284150000	548670000	941920000	1894500000	1065700000	7198000000	128130000	961210000	505650000	741680000	564060000	24082000	3893700000	1208800000	100130000	469840000	2.93038	0.688788	2.14567	0.503758	22.7834	0.241909	1.56726	10.6432	15.3201	1.61799e+09	1.3356	859728200	1.3163
207	TTLTGLDVQDMLPR	TTLTGLDVQDM(ox)LPR	0	1558.8	1;2;3	R	N	14	sp|P23280|CAH6_HUMAN	194	207	yes	1.7298e-77	280.17	359	-1.7552	A1;A10;A3;A4;A5;A6;A7;A8;A9;B1;B10;B2;B3;B4;B5;B6;B7;B8;B9	7500000000	9717700000	5317400000	9360500000	5483100000	8354300000	6217400000	5376400000	10434000000	12540000000	4241300000	6371300000	5211400000	3361300000	28828000	9016700000	29297000000	4792800000	5178600000	0.598086	2.29121	1.02034	2.78479	190.2	0.926536	0.21222	1.12177	2.01483	7.52898e+09	0.2685	8003922800	1.0227
208	FNTANDDNVTQVR	FNTAN(de)DDNVTQVR	0	1492.69	2	R	A	13	sp|P04040|CATA_HUMAN	432	444	yes	2.2241e-77	257.88	50	-1.9054	A1;A10;A3;A4;A5;A6;A7;A8;A9;B1;B10;B2;B3;B4;B5;B6;B7;B8;B9	98766000	114360000	90471000	6701700	30432000	106750000	229980000	42659000	595360000	51517000	91323000	60829000	38642000	166580000	1989800	429370000	61327000	26887000	115910000	1.91715	1.25226	2.34126	0.0402311	15.294	0.24862	3.75006	1.5866	5.1364	1.46164e+08	1.234	104437480	1.182
209	DVSLAKADAAPDEK		1	1428.71	2;3	R	V	14	sp|P01833|PIGR_HUMAN	572	585	yes	2.5679e-77	257.19	26	-0.42058	A1;A10;A3;A6;A7;A8;B10;B6;B7;B8;B9	2389300	139630000	15972000	0	0	12274000	43424000	18784000	0	0	135410000	0	0	0	0	17335000	373690000	661260000	156990000	--	1.03116	--	--	--	0.708047	0.116203	0.0284064	--	38745550	1.3231	268937000	0.9454
210	LLAGDHPIDLLLR		0	1444.84	2;3	R	D	13	sp|Q14515|SPRL1_HUMAN	567	579	yes	3.2044e-77	255.19	56	-0.63305	A1;A10;A3;A4;A5;A6;A7;A8;A9;B1;B10;B2;B3;B4;B5;B6;B7;B8;B9	317030000	101210000	468400000	617860000	602510000	99331000	135420000	232950000	326700000	1050000000	621280000	816240000	217750000	359450000	3026800	171040000	701590000	173310000	146800000	0.301933	0.162906	2.15109	1.7189	199.058	0.580747	0.193019	1.34412	2.22548	322379000	0.6288	426048680	0.8166
211	YEASILTHDSSIR		0	1490.74	2;3	K	Y	13	sp|P02679|FIBG_HUMAN	122	134	yes	3.55e-77	254.24	55	-1.6495	A1;A10;A3;A4;A5;A6;A7;A8;A9;B1;B10;B2;B3;B4;B5;B6;B7;B8;B9	73690000	8367000	420470000	19864000	66776000	412160000	165810000	44331000	701450000	4221900	592310000	20723000	44261000	30273000	3657400	802090000	108390000	82600000	208080000	17.4542	0.014126	9.49979	0.656162	18.2578	0.513858	1.52975	0.536695	3.37106	2.12546e+08	1.1427	189660630	1.4701
212	ALVFVDNHDNQR	ALVFVDN(de)HDNQR;ALVFVDN(de)HDN(de)QR	0	1426.7	1;2;3	R	G	12	sp|P04745|AMY1_HUMAN;sp|P19961|AMY2B_HUMAN;sp|P04746|AMYP_HUMAN;CON__Q3MHH8	307	318	no	5.2735e-77	250.08	1639	-2.7305	A1;A10;A3;A4;A5;A6;A7;A8;A9;B1;B10;B2;B3;B4;B5;B6;B7;B8;B9	42455000000	42748000000	84248000000	52445000000	30303000000	67237000000	100360000000	74457000000	94294000000	42200000000	76593000000	30740000000	12383000000	53319000000	1628900000	50632000000	73480000000	25060000000	45877000000	1.00604	0.558119	6.80352	0.983608	18.6034	1.32795	1.36581	2.97115	2.05537	6.53941e+10	0.3799	41191290000	0.5902
213	QINDYVEKGTQGK	QIN(de)DYVEKGTQGK;(gl)QINDYVEKGTQGK	1	1478.74	2;3	K	I	13	sp|P01009|A1AT_HUMAN	180	192	yes	8.9918e-77	251.43	84	-3.7847	A10;A3;A6;A7;A8;A9;B10;B6;B7;B8;B9	0	148000000	13137000	0	0	66753000	321380000	124680000	3220900	0	327580000	0	0	0	0	499820000	176570000	450770000	685480000	--	0.451798	--	--	--	0.133554	1.82013	0.276593	0.00469875	1.12862e+08	1.0405	428044000	0.4452
214	GLIDEVNQDFTNR	GLIDEVN(de)QDFTNR	0	1519.73	2	K	I	13	sp|P02671|FIBA_HUMAN	72	84	yes	2.5962e-76	227.27	8	0.38226	A1;A5;B1;B10;B2;B3;B9	149910000	0	0	0	169310000	0	0	0	0	21359000	135580000	95960000	21069000	0	0	0	0	0	393490000	7.01859	--	--	--	--	--	--	--	--	159610000	0.0859	133491600	1.1497
215	QQTVGGVNYFFDVEVGR	(gl)QQTVGGVNYFFDVEVGR;QQTVGGVN(de)YFFDVEVGR	0	1913.93	1;2;3	R	T	17	sp|P01037|CYTN_HUMAN	75	91	yes	7.9184e-76	275.85	961	-2.5565	A1;A10;A3;A4;A5;A6;A7;A8;A9;B1;B10;B2;B3;B4;B5;B6;B7;B8;B9	7261700000	650540000	370880000	5736900000	5952500000	1559800000	288830000	299650000	1783200000	7501800000	396080000	6409200000	3212800000	5017000000	185990000	5487200000	1606000000	19962000	32765000	0.967994	1.64245	0.115438	1.14349	32.0044	0.284262	0.179844	15.011	54.4239	2656000000	1.0644	2986879700	0.9762
216	TTGIVMDSGDGVTHTVPIYEGYALPHAILR	TTGIVM(ox)DSGDGVTHTVPIYEGYALPHAILR	0	3182.61	3;4;5	R	L	30	sp|P63261|ACTG_HUMAN;sp|P60709|ACTB_HUMAN	148	177	yes	1.6309e-75	225.14	130	-1.1571	A1;A10;A3;A4;A5;A6;A7;A8;A9;B1;B10;B2;B3;B4;B5;B6;B7;B9	3759300000	465220000	1318100000	2097300000	5197700000	3771500000	2635100000	1412500000	9203300000	841610000	2113400000	1790400000	7127100000	3797500000	4072700	4474000000	1149400000	0	2188500000	4.4668	0.220129	0.184942	0.552284	1276.23	0.842982	2.29259	--	4.2053	3317780000	0.7995	2.60955e+09	0.84
217	NILDRQDPPSVVVTSHQAPGEK	N(de)ILDRQDPPSVVVTSHQAPGEK	1	2386.22	2;3;4	K	K	22	sp|P25311|ZA2G_HUMAN	199	220	yes	3.1012e-75	308.25	460	-1.2004	A1;A10;A3;A4;A5;A6;A7;A8;A9;B1;B10;B2;B3;B4;B5;B6;B7;B8;B9	525400000	4609000000	7656700000	427470000	570420000	6346100000	4034900000	3394600000	10861000000	414800000	6922800000	658550000	562850000	485150000	3002300	13609000000	8479200000	2424700000	3224300000	1.26663	0.665771	13.6034	0.881109	189.994	0.466316	0.475859	1.40001	3.36848	4269510000	0.8389	3678435230	1.2397
218	TSRPENAIIYNNNEDFQVGQAK	TSRPENAIIYNN(de)NEDFQVGQAK;TSRPEN(de)AIIYNNN(de)EDFQVGQAK	1	2507.2	2;3	R	V	22	sp|P29401|TKT_HUMAN	472	493	yes	9.419e-75	217.88	206	-4.2811	A1;A10;A3;A4;A5;A6;A7;A8;A9;B1;B10;B2;B3;B4;B5;B6;B7;B8;B9	172120000	466750000	295210000	58551000	352250000	522910000	419840000	443570000	1160700000	6372300	516430000	239440000	200570000	121060000	514340	1424700000	700810000	80908000	461800000	27.0107	0.903801	1.47186	0.483653	684.858	0.367032	0.599078	5.4824	2.51343	4.32433e+08	0.7187	375260464	1.1621
219	TYWELLSGGEPLSQGAGSYVVR		0	2368.17	2	R	N	22	sp|P20061|TCO1_HUMAN	400	421	yes	1.4941e-74	309.14	4	-0.19016	A1;A4;A5;B1;B2;B3;B4	79009000	0	0	164850000	159600000	0	0	0	0	147330000	0	207870000	106750000	88894000	0	0	0	0	0	0.536272	--	--	1.85446	--	--	--	--	--	1.34486e+08	0.3578	137711000	0.3833
220	LHNLNSNWFPEGSKPFIYQEVIDLGGEPIKSSDYFGNGR	LHNLNSNWFPEGSKPFIYQEVIDLGGEPIKSSDYFGN(de)GR;LHNLN(de)SNWFPEGSKPFIYQEVIDLGGEPIKSSDYFGN(de)GR	2	4424.15	4;5	K	V	39	sp|P04745|AMY1_HUMAN	229	267	yes	3.3466e-73	202.68	21	-3.2577	A1;A4;A5;A9;B1;B2;B3;B4	243440000	0	0	396280000	267860000	0	0	0	62053000	217600000	0	341190000	25954000	359470000	0	0	0	0	0	1.11875	--	--	1.1024	--	--	--	--	--	242408250	0.5679	236053500	0.6506
221	DGAGDVAFIR		0	1019.5	1;2	R	E	10	sp|P02788|TRFL_HUMAN	220	229	yes	7.9016e-73	249.93	131	-0.7635	A1;A10;A3;A4;A5;A6;A7;A8;A9;B1;B10;B2;B3;B4;B5;B6;B7;B8;B9	977050000	739020000	2521800000	1336000000	1619800000	19735000000	1634000000	1615000000	2437000000	574180000	2364600000	420830000	3018000000	2763400000	18302000	526760000	5117500000	210370000	887950000	1.70164	0.312535	0.835586	0.483462	88.504	37.4649	0.319297	7.67695	2.74452	3.62385e+09	1.675	1590189200	1.0451
222	IYTSPTWSAFVTDSSWSAR		0	2161.01	2;3	R	K	19	sp|Q08380|LG3BP_HUMAN	408	426	yes	3.2615e-70	249.66	10	-1.7152	A1;A3;A4;A5;B1;B2;B3;B4	72055000	0	0	107720000	110630000	0	0	0	0	62819000	0	35110000	78994000	165420000	0	0	0	0	0	1.14703	--	--	0.651191	--	--	--	--	--	9.68017e+07	0.2219	85585750	0.6569
223	HTFMGVVSLGSPSGEVSHPR	HTFM(ox)GVVSLGSPSGEVSHPR	0	2080.02	3;4	R	K	20	sp|P02765|FETUA_HUMAN	318	337	yes	4.6278e-70	201.18	32	-0.80457	A1;A6;A7;B10;B7;B8;B9	29634000	0	0	0	0	158340000	173680000	0	0	0	255540000	0	0	0	0	0	0	72511000	315430000	--	--	--	--	--	--	--	--	--	1.20551e+08	0.6562	2.14494e+08	0.59
224	WGDAGAEYVVESTGVFTTMEK	WGDAGAEYVVESTGVFTTM(ox)EK	0	2276.03	2;3	K	A	21	sp|P04406|G3P_HUMAN	87	107	yes	2.0856e-69	298.54	5	-0.75888	A4;A5;B3	0	0	0	218180000	42317000	0	0	0	0	0	0	0	294490000	0	0	0	0	0	0	--	--	--	--	--	--	--	--	--	130248500	0.9547	294490000	--
225	ALQVTVPHFLDWSGEALQPTR		0	2364.22	2;3;4	R	I	21	sp|Q8N4F0|BPIB2_HUMAN	48	68	yes	2.3868e-69	238.81	36	-0.70548	A1;A3;A4;A5;A6;A7;A9;B1;B2;B3;B4;B6;B7	837330000	0	184920000	1486400000	925720000	560550000	145930000	0	369590000	1834300000	0	1388100000	852280000	1321700000	0	546650000	348470000	0	0	0.456485	--	0.216971	1.12461	--	1.02543	0.418773	--	--	6.44349e+08	0.7409	1.04858e+09	0.5374
226	FYQTSVESVDFANAPEESR		0	2174.98	2;3	K	K	19	sp|P29508|SPB3_HUMAN	126	144	yes	3.7259e-69	246.96	11	-2.3224	A1;A4;A5;B2;B3;B4;B6;B7	39910000	0	0	13036000	65946000	0	0	0	0	0	0	15998000	10721000	49274000	0	73948000	105300000	0	0	--	--	--	0.264561	--	--	--	--	--	3.96307e+07	0.6676	51048200	0.779
227	LQELHLSSNGLESLSPEFLRPVPQLR	LQELHLSSN(de)GLESLSPEFLRPVPQLR	1	2958.59	3;4	K	V	26	sp|P02750|A2GL_HUMAN	94	119	yes	5.7944e-69	235.57	10	-1.4205	A1;A4;A5;A6;B1;B10;B2;B3;B4	49925000	0	0	70514000	59739000	84239000	0	0	0	73548000	67194000	204970000	111140000	83154000	0	0	0	0	0	0.678808	--	--	0.847993	--	--	--	--	--	66104250	0.2228	108001200	0.5255
228	TITLEVEPSDTIENVK		0	1786.92	2	K	A	16	sp|P62987|RL40_HUMAN;sp|P62979|RS27A_HUMAN;sp|P0CG47|UBB_HUMAN;sp|P0CG48|UBC_HUMAN	12	27	yes	6.6306e-69	213.63	27	-0.0092629	A1;A10;A3;A4;A5;A6;A8;A9;B1;B2;B3;B4;B5;B7;B9	137610000	114960000	148550000	120660000	242880000	0	0	176120000	497370000	143050000	0	302580000	194990000	226530000	1482400	0	127780000	0	70199000	0.961971	--	0.761834	0.532645	163.842	--	--	--	7.08514	205450000	0.6611	1.52373e+08	0.6568
229	ALHFAISEYNKATKDDYYR	ALHFAISEYN(de)KATKDDYYR	2	2304.12	3;4;5	R	R	19	sp|P01037|CYTN_HUMAN	47	65	yes	7.0338e-69	240.63	96	-3.6351	A10;A3;A6;A7;A8;A9;B10;B6;B7;B8;B9	0	263820000	297710000	0	0	240200000	167220000	135110000	1082600000	0	457740000	0	0	0	0	3359900000	682830000	109590000	195520000	--	0.576353	--	--	--	0.0714902	0.244893	1.23287	5.53703	3.64443e+08	0.9796	961116000	1.4148
230	IQYQLVDISQDNALRDEMR	IQYQLVDISQDN(de)ALRDEMR;IQYQLVDISQDNALRDEM(ox)R	1	2306.13	2;3	R	A	19	sp|Q9H299|SH3L3_HUMAN	33	51	yes	2.1072e-68	241.42	28	-1.1345	A1;A4;A5;A6;A7;A9;B1;B2;B3;B4;B6	261700000	0	0	315870000	389290000	336960000	206230000	0	929850000	93596000	0	546320000	360870000	420380000	0	540250000	0	0	0	2.79606	--	--	0.751392	--	0.623711	--	--	--	406650000	0.6491	392283200	0.4711
231	TPSAAYLWVGTGASEAEKTGAQELLR		1	2705.37	3	K	V	26	sp|P06396|GELS_HUMAN	598	623	yes	5.7268e-68	233.91	1	1.0346	B6	0	0	0	0	0	0	0	0	0	0	0	0	0	0	0	319490000	0	0	0	--	--	--	--	--	--	--	--	--	0	--	319490000	--
232	DASGATFTWTPSSGK		0	1511.69	2;3	R	S	15	sp|P01877|IGHA2_HUMAN;sp|P0DOX2|IGA2_HUMAN	256	270	no	9.1797e-68	273.8	256	-1.3198	A1;A10;A3;A4;A5;A6;A7;A8;A9;B1;B10;B2;B3;B4;B5;B6;B7;B8;B9	2452100000	8709900000	13301000000	5965800000	6522200000	18001000000	9309600000	11399000000	16743000000	3345000000	12156000000	2282900000	2204600000	5864200000	64337000	12284000000	17900000000	2053000000	2644500000	0.733064	0.71651	6.03329	1.01733	101.376	1.4654	0.520089	5.55236	6.33125	1.02671e+10	0.498	6079853700	0.9751
233	GFGGVQVSPPNENVAIHNPFRPWWER	GFGGVQVSPPN(de)ENVAIHNPFRPWWER	1	2989.47	2;3;4;5	K	Y	26	sp|P04745|AMY1_HUMAN;sp|P19961|AMY2B_HUMAN	51	76	no	1.4197e-67	230.48	104	-1.774	A1;A3;A4;A5;A9;B1;B2;B3;B4;B5;B6	11592000000	0	56178000	20945000000	11522000000	0	0	0	488470000	13410000000	0	12875000000	3202200000	13461000000	65273000	126980000	0	0	0	0.86443	--	0.0175436	1.55598	176.52	--	--	--	--	8920729600	0.9839	7190075500	0.9369
234	SKDDQVTVIGAGVTLHEALAAAELLK		1	2648.44	3;4	K	K	26	sp|P29401|TKT_HUMAN	498	523	yes	3.5693e-67	223.76	19	-0.51608	A1;A4;A5;A8;A9;B10;B2;B3;B4;B5;B6;B9	281880000	0	0	126310000	513560000	0	0	36912000	310160000	0	55108000	283120000	388040000	277090000	3256500	342890000	0	0	9715000	--	--	--	0.455845	157.703	--	--	--	31.9259	253764400	0.7232	1.94174e+08	0.8522
235	LVGGPMDASVEEEGVRR	LVGGPM(ox)DASVEEEGVRR	1	1799.88	2;3	R	A	17	sp|P01034|CYTC_HUMAN	35	51	yes	5.7084e-66	281.25	354	-1.9069	A1;A10;A3;A4;A5;A6;A7;A8;A9;B1;B10;B2;B3;B4;B5;B6;B7;B8;B9	2946500000	3039100000	8252100000	2074300000	1032000000	6390200000	1784800000	3114700000	9330600000	2872600000	6982200000	589610000	1209400000	2552400000	14523000	4334800000	8333700000	2700900000	3696500000	1.02573	0.435264	6.8233	0.812686	71.0597	1.47416	0.214167	1.15321	2.52417	4.21826e+09	0.7113	3328663300	0.7994
236	ENTHFTVLIHELAEAFQK		0	2126.08	3;4	K	D	18	sp|Q15782|CH3L2_HUMAN	151	168	yes	5.8225e-66	236.96	8	-0.17033	A1;A4;A5;B1;B2;B3;B4	29701000	0	0	33021000	117990000	0	0	0	0	12383000	0	58724000	40014000	179100000	0	0	0	0	0	2.39853	--	--	0.184372	--	--	--	--	--	6.02373e+07	0.8308	72555250	1.0135
237	ETEGLRQEMSKDLEEVK		2	2019.98	2;3;4	K	A	17	sp|P02647|APOA1_HUMAN	102	118	yes	8.8279e-66	243.09	37	-0.98526	A1;A3;A4;A5;A6;A7;A8;A9;B10;B2;B3;B6;B8;B9	45878000	0	60179000	21664000	40138000	382270000	267670000	44508000	101290000	0	103120000	135300000	83460000	0	0	247190000	0	19682000	209480000	--	--	0.721052	--	--	1.54646	--	2.26136	0.483531	120449625	1.095	1.33039e+08	0.6296
238	HIFSEDTSDFSGMSETK		0	1916.81	2;3	K	G	17	sp|P36952|SPB5_HUMAN	295	311	yes	3.4134e-65	299.04	16	-1.2331	A10;A3;A8;A9;B1;B6;B7;B8;B9	0	12087000	90769000	0	0	0	0	19451000	0	0	0	0	0	0	0	0	341810000	7816400	66935000	--	--	--	--	--	--	--	2.48849	--	40769000	1.0659	138853800	1.2836
239	HQTVPQNTGGKNPDPWAK	HQTVPQN(de)TGGKNPDPWAK	1	1973.97	2;3;4	K	N	18	sp|P02787|TRFE_HUMAN	554	571	yes	3.7624e-65	260.96	318	-1.8902	A1;A10;A3;A4;A5;A6;A7;A8;A9;B10;B2;B3;B4;B5;B6;B7;B8;B9	39237000	287020000	790400000	10200000	56422000	950880000	2481700000	332710000	410760000	0	1871000000	68804000	90619000	82553000	1240600	4072700000	468680000	1384500000	1807800000	--	0.153405	8.72223	0.123557	45.4796	0.233477	5.29508	0.240311	0.227215	595481000	1.3093	1.09421e+09	1.2404
240	QEPSQGTTTFAVTSILR	(gl)QEPSQGTTTFAVTSILR;QEPSQ(de)GTTTFAVTSILR	0	1834.94	1;2;3	R	V	17	sp|P01876|IGHA1_HUMAN	283	299	yes	4.3735e-65	297.03	659	-4.3223	A1;A10;A3;A4;A5;A6;A7;A8;A9;B1;B10;B2;B3;B4;B5;B6;B7;B8;B9	9200800000	18147000000	12810000000	10075000000	7729400000	16596000000	12679000000	16413000000	14574000000	7201300000	17010000000	6617200000	8228700000	12718000000	27873000	17898000000	17071000000	6163100000	5090100000	1.27766	1.06684	1.55675	0.792184	277.308	0.927254	0.742722	2.66311	2.86321	1.3136e+10	0.2749	9802527300	0.617
241	ADSSPVKAGVETTTPSK		1	1673.85	2;3	K	Q	17	sp|P0DOY2|IGLC2_HUMAN;sp|P0DOY3|IGLC3_HUMAN	44	60	yes	7.5756e-65	287.48	243	-1.3754	A1;A10;A3;A4;A5;A6;A7;A8;A9;B1;B10;B2;B3;B4;B5;B6;B7;B8;B9	5757700	2763100000	2203800000	4091100	7152800	1599400000	3690200000	1496800000	76721000	1223400	4753800000	2942000	8402400	20103000	640000	5674500000	4450500000	2049800000	1503800000	4.70631	0.58124	262.282	0.203507	11.1762	0.281857	0.829165	0.730218	0.0510181	1.31634e+09	1.0512	1846571080	1.2372
242	VSLDVNHFAPDELTVK	VSLDVN(de)HFAPDELTVK	0	1782.92	2;3	R	T	16	sp|P04792|HSPB1_HUMAN	97	112	yes	1.4833e-64	249.32	54	-1.0838	A1;A3;A4;A5;A6;A7;A8;A9;B1;B10;B2;B3;B4;B5;B6;B7;B8;B9	99329000	0	219930000	223160000	377400000	714360000	370080000	133390000	624930000	182900000	88419000	215710000	242880000	136710000	537840	581470000	444190000	234970000	579950000	0.543078	--	0.905509	1.63236	701.696	1.22854	0.833157	0.567689	1.07756	345322375	0.6495	270773684	0.7379
243	DNSKNTLYLQMNSLR	DNSKNTLYLQMN(de)SLR;DNSKN(de)TLYLQMN(de)SLR	1	1795.89	2;3	R	A	15	sp|P01767|HV353_HUMAN;sp|A0A0C4DH42|HV366_HUMAN;sp|P0DP03|HVC05_HUMAN;sp|P0DP02|HVC33_HUMAN;sp|P01772|HV333_HUMAN;sp|P01768|HV330_HUMAN;sp|P01764|HV323_HUMAN	91	105	yes	2.613e-64	281.26	22	-3.156	A1;A10;A3;A4;A5;A6;A7;A8;A9;B3;B4;B6	19129000	19588000	49827000	36897000	13775000	234260000	62036000	46048000	669370000	0	0	0	94012000	33183000	0	50395000	0	0	0	--	--	0.530007	1.11192	--	4.64848	--	--	--	1.27881e+08	1.6737	5.91967e+07	0.5297
244	YPIEHGIITNWDDMEK	YPIEHGIITNWDDM(ox)EK;YPIEHGIITN(de)WDDMEK	0	1959.9	2;3	K	I	16	sp|P68133|ACTS_HUMAN;sp|P68032|ACTC_HUMAN;sp|P63267|ACTH_HUMAN;sp|P62736|ACTA_HUMAN	71	86	yes	8.2298e-64	246.63	111	-4.439	A1;A10;A3;A4;A5;A6;A7;A8;A9;B1;B10;B2;B3;B4;B5;B6;B7;B8;B9	1748800000	144800000	1383900000	1346000000	2148700000	1987100000	914750000	564440000	6693300000	912240000	1348600000	825940000	1625600000	1602500000	3361200	1563700000	566590000	144960000	802130000	1.91704	0.107371	0.851316	0.839938	639.266	1.27077	1.61448	3.89376	8.34441	1881310000	1.0203	939562120	0.6293
245	ILLQGTPVAQMTEDAVDAER	ILLQGTPVAQM(ox)TEDAVDAER	0	2156.08	2;3	R	L	20	sp|P01024|CO3_HUMAN	980	999	yes	8.6464e-64	203.32	17	0.12169	A1;A5;A6;A7;A9;B3;B6;B8;B9	42496000	0	0	0	45779000	53590000	61203000	0	42578000	0	0	0	51535000	0	0	199010000	0	268490000	454670000	--	--	--	--	--	0.269283	--	--	0.0936459	49129200	0.1653	243426250	0.6876
246	ALHFAISEYNK	ALHFAISEYN(de)K	0	1291.66	1;2;3	R	A	11	sp|P01037|CYTN_HUMAN;sp|P01036|CYTS_HUMAN	47	57	no	1.0921e-63	285.32	1176	-3.3795	A1;A10;A3;A4;A5;A6;A7;A8;A9;B1;B10;B2;B3;B4;B5;B6;B7;B8;B9	49310000000	15167000000	39892000000	19268000000	33257000000	42835000000	25449000000	14435000000	68827000000	27809000000	37034000000	15185000000	14138000000	20473000000	611740000	83051000000	32467000000	15006000000	22239000000	1.77317	0.409543	2.82162	0.941142	54.3646	0.515767	0.783842	0.961949	3.09488	3.42711e+10	0.5248	26801374000	0.8327
247	EAEAAIYHLQLFEELR		0	1930.98	2;3	R	R	16	sp|P14618|KPYM_HUMAN	384	399	yes	1.3378e-63	244.58	5	0.68763	A1;A4;A5;B3;B4	19124000	0	0	20944000	36890000	0	0	0	0	0	0	0	100440000	85804000	0	0	0	0	0	--	--	--	0.244091	--	--	--	--	--	2.56527e+07	0.381	93122000	0.1111
248	AALSYVSEIGKAPLQR		1	1701.94	2;3	K	A	16	sp|Q8N4F0|BPIB2_HUMAN	32	47	yes	1.6821e-63	301.58	56	-0.67701	A10;A3;A6;A7;A8;A9;B10;B6;B7;B8;B9	0	3420400000	2557400000	0	0	1959600000	4324700000	1340300000	3073700000	0	3672300000	0	0	0	0	4934600000	4974600000	1346000000	1736200000	--	0.931405	--	--	--	0.397114	0.869356	0.995765	1.77036	2779350000	0.3834	3332740000	0.517
249	PQLLQNINGIIEAFR	PQLLQNIN(de)GIIEAFR	0	1724.96	2;3	M	R	15	sp|Q9UBG3|CRNN_HUMAN	2	16	yes	2.194e-63	248.41	11	-0.5889	A1;A3;A4;A5;A9;B1;B2;B3;B4	20832000	0	27057000	84188000	196350000	0	0	0	44594000	40804000	0	69295000	40498000	193490000	0	0	0	0	0	0.510538	--	0.668107	0.435103	--	--	--	--	--	74604200	0.9704	86021750	0.8475
250	LHSFLGDDVFLR		0	1417.74	2;3	K	E	12	sp|P06737|PYGL_HUMAN	522	533	yes	2.5414e-63	193.3	9	-0.33771	A1;A4;A5;A9;B3;B4;B5	64916000	0	0	49705000	116820000	0	0	0	53883000	0	0	0	70168000	85387000	176140	0	0	0	0	--	--	--	0.582114	663.222	--	--	--	--	71331000	0.4346	51910380	0.8754
251	VENSMYIINPWVYLER	VENSM(ox)YIINPWVYLER;VEN(de)SMYIINPWVYLER;VEN(de)SM(ox)YIINPWVYLER	0	2025	2;3	R	M	16	sp|Q6P5S2|LEG1H_HUMAN	45	60	yes	3.1577e-63	237.32	44	-4.0138	A1;A3;A4;A5;A6;A9;B1;B2;B3;B4;B6	219440000	0	180330000	1407900000	1046000000	59088000	0	0	133460000	1140800000	0	1661900000	369370000	433820000	0	54524000	0	0	0	0.192356	--	0.48821	3.24536	--	1.08371	--	--	--	507703000	1.1252	732082800	0.8934
252	GLGTDEDTLIEILASR		0	1701.88	2;3	K	T	16	sp|P04083|ANXA1_HUMAN	129	144	yes	3.4448e-63	286.19	25	-1.211	A1;A10;A3;A4;A5;A6;A7;A8;A9;B1;B10;B2;B3;B4;B6;B7;B9	89097000	60781000	103710000	107600000	235400000	908740000	435130000	110150000	238580000	96614000	42301000	108620000	510660000	190990000	0	404930000	344170000	0	90557000	0.922196	1.43687	0.20309	0.56338	--	2.24419	1.26429	--	2.63458	2.54354e+08	1.0689	223605250	0.7761
253	IQLVEEELDRAQER		1	1726.88	2;3	R	L	14	sp|P06753|TPM3_HUMAN;sp|P67936|TPM4_HUMAN;sp|P09493|TPM1_HUMAN	93	106	no	3.9633e-63	203.82	41	-2.1616	A1;A10;A3;A4;A5;A6;A7;A8;A9;B1;B10;B2;B3;B4;B6;B7;B8;B9	65526000	387880000	204620000	64471000	97379000	372250000	256780000	685880000	940720000	15303000	357570000	47052000	132560000	43966000	0	610590000	765670000	31046000	386020000	4.28191	1.08477	1.5436	1.46638	--	0.609656	0.335366	22.0924	2.43697	3.41723e+08	0.8774	2.65531e+08	1.052
254	ALEAAESEGAETPR		0	1429.67	2	R	M	14	sp|Q86VR7|VS10L_HUMAN	342	355	yes	4.4796e-63	247.31	21	-2.2279	A1;A10;A3;A4;A6;A7;A8;A9;B1;B10;B3;B4;B6;B7;B8	10753000	17211000	60571000	6170200	0	10499000	0	30535000	59781000	3078400	39900000	0	3378500	8513600	0	75751000	55656000	21892000	0	3.49305	0.431353	17.9284	0.724746	--	0.138599	--	1.3948	--	2.79315e+07	0.8363	29738500	0.9521
255	MAVGFMLAHPYGFTR	M(ox)AVGFM(ox)LAHPYGFTR;M(ox)AVGFMLAHPYGFTR	0	1696.82	2;3	K	V	15	sp|P04745|AMY1_HUMAN;sp|P19961|AMY2B_HUMAN;sp|P04746|AMYP_HUMAN	338	352	no	5.4829e-63	240.8	238	-3.3748	A1;A3;A4;A5;A8;A9;B1;B2;B3;B4;B5	2721100000	0	339630000	5515000000	2048000000	0	0	136990000	228310000	3681800000	0	3240300000	1119100000	5294200000	27500000	0	0	0	0	0.739068	--	0.303485	1.04171	74.4727	--	--	--	--	1831505000	1.1472	2672580000	0.7854
256	AISGLTIDGHAVGAK		0	1408.77	2;3	K	L	15	sp|Q9Y6R7|FCGBP_HUMAN	366	380	yes	5.741e-63	240.37	75	-0.57692	A1;A10;A3;A4;A5;A6;A7;A8;A9;B1;B10;B2;B3;B4;B5;B6;B7;B8;B9	176960000	177760000	1384600000	82596000	317880000	320040000	138530000	435160000	1154900000	636690000	239580000	56120000	10598000	18991000	1422900	164590000	1506200000	200500000	13795000	0.277937	0.741965	130.647	4.34922	223.403	1.94447	0.0919732	2.17037	83.7187	4.65381e+08	1.0146	284848690	1.6513
257	AFYVNVLNEEQR		0	1480.73	2	R	K	12	sp|P04040|CATA_HUMAN	445	456	yes	5.7465e-63	244.55	14	-0.73189	A1;A10;A3;A5;A6;A7;A9;B10;B2;B3;B4;B5;B6;B8;B9	57550000	227710000	87068000	0	78976000	141530000	143100000	0	290790000	0	95577000	52070000	100760000	65964000	693250	301140000	0	47010000	170090000	--	2.38248	0.864113	--	113.921	0.469981	--	--	1.70962	1.46675e+08	0.5802	1.04163e+08	0.899
258	DASGVTFTWTPSSGK		0	1539.72	1;2;3	R	S	15	sp|P01876|IGHA1_HUMAN	154	168	yes	6.9083e-63	285.13	220	-2.5135	A1;A10;A3;A4;A5;A6;A7;A8;A9;B1;B10;B2;B3;B4;B5;B6;B7;B8;B9	7119100000	19032000000	13385000000	5035800000	6557800000	13668000000	9971000000	13750000000	15681000000	5907000000	16816000000	4534000000	9675100000	9704700000	83519000	14501000000	16889000000	9000400000	5883000000	1.2052	1.13178	1.38345	0.518903	78.5187	0.942556	0.590384	1.52771	2.66548	1.15777e+10	0.4042	9299371900	0.5916
259	LAQANGWGVMVSHR	LAQAN(de)GWGVMVSHR;LAQAN(de)GWGVM(ox)VSHR	0	1524.76	2;3	K	S	14	sp|P06733|ENOA_HUMAN	359	372	yes	8.8379e-63	247.79	185	-3.6674	A1;A10;A3;A4;A5;A6;A7;A8;A9;B1;B10;B2;B3;B4;B5;B6;B7;B8;B9	355480000	227640000	887820000	325440000	605970000	343660000	424330000	396180000	1972400000	141730000	487670000	241130000	417750000	517020000	3433000	1093400000	1101400000	84417000	375800000	2.50815	0.466791	2.12524	0.629453	176.513	0.314304	0.385264	4.69313	5.24854	6.15436e+08	0.8855	446375000	0.8587
260	VHVGDEDFVHLR		0	1421.71	2;3;4	K	V	12	sp|P04080|CYTB_HUMAN	57	68	yes	1.0221e-62	240.38	233	-1.0017	A1;A10;A3;A4;A5;A6;A7;A8;A9;B1;B10;B2;B3;B4;B5;B6;B7;B8;B9	4365300000	1342000000	2928500000	4224600000	4458100000	1967800000	2043700000	4871700000	13789000000	1918800000	362740000	4594600000	3477600000	6215200000	78463000	8548100000	3862200000	349850000	1132300000	2.27502	3.69962	0.842104	0.679721	56.8179	0.230203	0.529154	13.9251	12.1779	4.44341e+09	0.8397	3053985300	0.9247
261	SVHWYQQKPGQAPVLVVYDDSDRPSGIPER		2	3422.7	4;5	K	F	30	sp|P80748|LV321_HUMAN	50	79	yes	1.0405e-62	213.55	20	-0.31165	A1;A3;A5;A9;B1;B10;B3;B4;B6	75888000	0	451530000	0	226170000	0	0	0	268670000	44494000	463880000	0	108890000	357100000	0	190340000	0	0	0	1.70558	--	4.14666	--	--	--	--	--	--	255564500	0.605	232940800	0.7481
262	HYDGSYSTFGER		0	1417.59	2;3	K	Y	12	sp|P01023|A2MG_HUMAN	1020	1031	yes	1.1286e-62	239.39	147	-1.1534	A1;A10;A3;A4;A5;A6;A7;A8;A9;B1;B10;B2;B3;B4;B5;B6;B7;B8;B9	85944000	417950000	554670000	81823000	168850000	857190000	2219300000	332200000	194560000	21560000	1263400000	189830000	150800000	207310000	9575100	2082200000	173110000	1127300000	1562800000	3.98627	0.330814	3.67818	0.394689	17.6343	0.411675	12.8202	0.294686	0.124494	5.45832e+08	1.2378	678788510	1.1165
263	SEQLGGDVESYDKIR		1	1694.81	2;3	K	A	15	sp|Q9HC84|MUC5B_HUMAN	1520	1534	yes	1.1574e-62	240.12	112	-1.6057	A1;A10;A3;A4;A5;A6;A7;A8;A9;B1;B10;B2;B3;B4;B5;B6;B7;B8;B9	225800000	313800000	3268500000	267800000	372970000	1698200000	3136200000	455610000	3978100000	340960000	1842800000	352430000	308390000	501270000	3428500	4734200000	1155300000	321170000	599560000	0.662248	0.170284	10.5986	0.534243	108.785	0.358709	2.71462	1.41859	6.63503	1.52411e+09	1.0082	1015950850	1.387
264	TSESGELHGLTTEEEFVEGIYKVEIDTK		1	3139.51	3;4	K	S	28	sp|P02766|TTHY_HUMAN	69	96	yes	1.2633e-62	219.32	14	-0.95684	A1;A4;A5;A6;B1;B2;B3;B4	164750000	0	0	125120000	121670000	77012000	0	0	0	60761000	0	241150000	243920000	194570000	0	0	0	0	0	2.71144	--	--	0.643059	--	--	--	--	--	122138000	0.2937	185100250	0.4642
265	QKWEAEPVYVQR	(gl)QKWEAEPVYVQR;Q(de)KWEAEPVYVQR	1	1531.78	1;2;3	K	A	12	sp|P25311|ZA2G_HUMAN	166	177	yes	1.3192e-62	243.65	315	-1.4227	A1;A10;A3;A4;A5;A6;A7;A8;A9;B1;B10;B2;B3;B4;B5;B6;B7;B8;B9	4019000000	12936000000	15963000000	3930800000	3949300000	12954000000	12583000000	12667000000	18402000000	3940900000	15356000000	3909300000	3389200000	3498000000	32909000	26332000000	22764000000	6791900000	8305900000	1.01982	0.842407	4.70996	1.12373	120.007	0.491949	0.552759	1.86502	2.21553	1.08227e+10	0.5065	9432010900	0.9532
266	EVGVYEALKDDSWLK		1	1750.88	2;3	K	G	15	sp|P40925|MDHC_HUMAN	206	220	yes	1.4004e-62	276.47	18	-1.1122	A1;A4;A5;A9;B1;B2;B3;B4	54549000	0	0	50191000	99560000	0	0	0	65720000	10078000	0	83330000	74897000	60283000	0	0	0	0	0	5.41268	--	--	0.83259	--	--	--	--	--	67505000	0.3311	57147000	0.5738
267	LGHPDTLNQGEFK	LGHPDTLN(de)QGEFK	0	1454.72	1;2;3	K	E	13	sp|P06702|S10A9_HUMAN	26	38	yes	1.5376e-62	248.21	401	-1.4863	A1;A10;A3;A4;A5;A6;A7;A8;A9;B1;B10;B2;B3;B4;B5;B6;B7;B8;B9	9411000000	1669500000	10337000000	1921400000	10064000000	7759300000	11255000000	6105900000	15914000000	899230000	13364000000	413930000	3329500000	4696800000	205490000	12957000000	4929600000	838240000	1191200000	10.4656	0.124925	3.10467	0.409087	48.9756	0.59885	2.28315	7.28419	13.3596	8.27079e+09	0.549	4282499000	1.1641
268	LISWYDNEFGYSNR	LISWYDN(de)EFGYSNR	0	1762.8	2	K	V	14	sp|P04406|G3P_HUMAN	310	323	yes	1.6903e-62	240.1	29	-1.4088	A1;A3;A4;A5;A8;A9;B1;B10;B2;B3;B4;B6;B7;B9	305070000	0	25060000	221170000	503410000	0	0	75577000	203410000	144600000	48850000	30589000	294450000	149980000	0	100620000	179180000	0	0	2.10975	--	0.0851078	1.47466	--	--	--	--	--	2.22283e+08	0.7705	135467000	0.6547
269	VDHQTGPIVWGEPGTNGQHAFYQLIHQGTK	VDHQTGPIVWGEPGTN(de)GQHAFYQLIHQGTK	0	3314.62	3;4;5	R	M	30	sp|P06744|G6PI_HUMAN	371	400	yes	1.6923e-62	209.65	21	-0.77096	A1;A4;A5;A9;B2;B3;B4;B6	193360000	0	0	145360000	367920000	0	0	0	252300000	0	0	394810000	259190000	155620000	0	131230000	0	0	0	--	--	--	0.93407	--	--	--	--	--	239735000	0.4004	235212500	0.5101
270	TTFDEAMADLHTLSEDSYKDSTLIMQLLR	TTFDEAM(ox)ADLHTLSEDSYKDSTLIMQLLR	1	3343.6	3;4	K	D	29	sp|P31947|1433S_HUMAN	196	224	yes	1.8466e-62	214.91	4	0.29907	A9;B3;B4	0	0	0	0	0	0	0	0	279640000	0	0	0	5262100	33910000	0	0	0	0	0	--	--	--	--	--	--	--	--	--	279640000	--	19586050	1.0343
271	HVIEIHIVHYNSK	HVIEIHIVHYN(de)SK	0	1587.85	2;3;4;5	R	Y	13	sp|P23280|CAH6_HUMAN	133	145	yes	1.91e-62	278.51	368	-2.3157	A1;A10;A3;A4;A5;A6;A7;A8;A9;B1;B10;B2;B3;B4;B5;B6;B7;B8	4979700000	177830000	1545600000	6101600000	1845000000	1849000000	327720000	111090000	4521900000	3921600000	293000000	2856900000	2717100000	1972800000	25218000	1028000000	729540000	36307000	0	1.26981	0.606928	0.568842	3.09286	73.162	1.79864	0.449215	3.05974	--	2.38438e+09	0.9456	1.50894e+09	0.9372
272	VSEADSSNADWVTK	VSEADSSN(de)ADWVTK	0	1507.68	2	K	Q	14	sp|P00751|CFAB_HUMAN	324	337	yes	2.1327e-62	237.53	39	-0.71025	A1;A10;A3;A5;A6;A7;A8;A9;B10;B2;B3;B4;B5;B6;B7;B8;B9	40474000	30303000	78684000	0	24515000	175630000	191040000	39032000	132930000	0	220510000	15834000	21645000	29191000	1151200	203130000	73293000	156530000	126530000	--	0.137422	3.6352	--	21.2952	0.864619	2.60652	0.249358	1.05058	89076000	0.7639	9.42016e+07	0.8998
273	LLEQEFADVIVKPHDPATVDEVLR		1	2732.44	3;4	R	L	24	sp|Q9UBG3|CRNN_HUMAN	36	59	yes	3.0263e-62	196.81	28	-0.23074	A1;A10;A3;A4;A5;A6;A7;A8;A9;B1;B2;B3;B4;B6;B7	376070000	207210000	443320000	542460000	859870000	365460000	86219000	1538200000	1350600000	283790000	0	626130000	101600000	849380000	0	1313200000	385890000	0	0	1.32517	--	4.36339	0.638654	--	0.278297	0.223429	--	--	6.41045e+08	0.7891	5.93332e+08	0.7406
274	HIQETEWQSQEGK		0	1598.73	2;3	K	T	13	sp|Q14515|SPRL1_HUMAN	287	299	yes	3.5356e-62	237.67	6	-2.6247	A5;B1;B2	0	0	0	0	14524000	0	0	0	0	39992000	0	2264900	0	0	0	0	0	0	0	--	--	--	--	--	--	--	--	--	14524000	--	21128450	1.2626
275	IVADKDYSVTANSK	IVADKDYSVTAN(de)SK	1	1509.77	2;3	K	I	14	sp|P07195|LDHB_HUMAN	78	91	yes	3.7361e-62	241.78	75	-0.88983	A1;A10;A3;A4;A5;A6;A7;A8;A9;B1;B10;B2;B3;B4;B5;B6;B7;B8;B9	8077900	46664000	31237000	14091000	32644000	23963000	45569000	53001000	87871000	1984500	52372000	18987000	29565000	25497000	501880	122560000	56146000	17358000	62095000	4.0705	0.89101	1.05655	0.552653	65.0434	0.195521	0.811616	3.0534	1.41511	3.81242e+07	0.6278	38706638	0.9426
276	QVIDVLETDKHFR	(gl)QVIDVLETDKHFR	1	1598.84	2;3;4	K	E	13	sp|P80303|NUCB2_HUMAN	60	72	yes	3.8623e-62	255.7	132	-2.6045	A1;A10;A3;A4;A5;A6;A7;A8;A9;B1;B10;B2;B3;B4;B5;B6;B7;B8;B9	211600000	251440000	879510000	565440000	214320000	491080000	480800000	1447400000	1281300000	369170000	1207300000	47905000	130590000	42838000	291730	238280000	3691600000	1094400000	366540000	0.573178	0.208266	6.7349	13.1995	734.652	2.06094	0.130242	1.32255	3.49566	6.46988e+08	0.7102	718891473	1.5699
277	SVNGKEDAIWNLLR	SVN(de)GKEDAIWN(de)LLR;SVN(de)GKEDAIWNLLR	1	1613.85	2;3	R	Q	14	sp|P02788|TRFL_HUMAN	278	291	yes	5.0196e-62	238.98	77	-1.728	A1;A10;A3;A4;A5;A6;A7;A8;A9;B1;B10;B2;B3;B4;B7;B8;B9	507500000	536870000	324070000	750860000	1133400000	5885600000	292260000	696840000	205740000	342730000	682750000	235320000	1918800000	2450700000	0	0	2938100000	17649000	184280000	1.48076	0.786335	0.168892	0.306386	--	--	0.0994724	39.4833	1.11645	1.14813e+09	1.5668	1096291125	1.0558
278	FAVLQENVAWGNGR	FAVLQENVAWGN(de)GR	0	1559.78	2;3	R	V	14	sp|Q9Y6R7|FCGBP_HUMAN	1291	1304	yes	5.6532e-62	236.33	17	-3.5139	A1;A10;A3;A4;A5;A8;A9;B1;B2;B7	88699000	36282000	166070000	65193000	295430000	0	0	100490000	181700000	552630000	0	147210000	0	0	0	0	159000000	0	0	0.160503	--	--	--	--	--	--	--	--	1.33409e+08	0.6621	286280000	0.806
279	NGRVEIIANDQGNR	N(de)GRVEIIANDQGNR;N(de)GRVEIIAN(de)DQGNR	1	1554.79	2;3	K	I	14	sp|P11021|BIP_HUMAN	47	60	yes	5.7325e-62	213.63	12	-0.77993	A10;A6;A7;A8;A9;B6;B7;B8	0	17514000	0	0	0	19749000	97092000	37686000	124960000	0	0	0	0	0	0	181340000	193070000	11383000	0	--	--	--	--	--	0.108906	0.502885	3.31073	--	59400200	0.8212	1.28598e+08	0.7907
280	SSDYFGNGRVTEFK	SSDYFGN(de)GRVTEFK	1	1605.74	2;3	K	Y	14	sp|P04745|AMY1_HUMAN;sp|P19961|AMY2B_HUMAN;sp|P04746|AMYP_HUMAN	259	272	no	6.3513e-62	236.08	302	-1.827	A1;A10;A3;A4;A5;A6;A7;A8;A9;B1;B10;B2;B3;B4;B5;B6;B7;B8;B9	406990000	8491600000	2162200000	484960000	280620000	1737700000	6218100000	6030500000	4187300000	335510000	4260000000	424530000	151050000	599100000	24720000	1986800000	8931300000	1503000000	5424400000	1.21305	1.99333	14.3145	0.809481	11.3519	0.874623	0.696214	4.01231	0.771938	3333330000	0.9053	2364041000	1.248
281	LATALQKLEEAEK		1	1442.8	2;3	R	A	13	sp|P06753|TPM3_HUMAN;sp|P67936|TPM4_HUMAN;sp|P09493|TPM1_HUMAN	107	119	no	6.7601e-62	238.01	30	-1.1546	A10;A3;A6;A7;A8;A9;B10;B6;B7;B9	0	176430000	42238000	0	0	52230000	200860000	360830000	251240000	0	241750000	0	0	0	0	305100000	125940000	0	133100000	--	0.729804	--	--	--	0.17119	1.59489	--	1.8876	180638000	0.6713	201472500	0.4321
282	IEKVEHSDLSFSK		1	1517.77	2;3;4	R	D	13	sp|P61769|B2MG_HUMAN	66	78	yes	7.0687e-62	262.11	89	-0.54095	A1;A10;A3;A4;A5;A6;A7;A8;A9;B1;B10;B2;B3;B4;B5;B6;B7;B8;B9	338810000	226220000	1174700000	405550000	487740000	1123400000	461920000	312290000	74670000	267930000	1458400000	251700000	448580000	862050000	5972200	576740000	1034100000	79588000	118960000	1.26455	0.155115	2.61871	0.470448	81.6684	1.94784	0.446688	3.92383	0.62769	511700000	0.7474	510402020	0.9291
283	LREQLGPVTQEFWDNLEKETEGLR		2	2886.45	4	K	Q	24	sp|P02647|APOA1_HUMAN	84	107	yes	1.772e-61	224.95	5	-0.26879	A1;A4;A5;A6;A7;B2;B3;B4	28966000	0	0	19817000	34242000	138910000	54638000	0	0	0	0	162520000	56746000	24888000	0	0	0	0	0	--	--	--	0.796247	--	--	--	--	--	55314600	0.8758	8.13847e+07	0.8853
284	LRTEGDGVYTLNDKK	LRTEGDGVYTLN(de)DKK	2	1707.88	2;3;4	K	Q	15	sp|P00738|HPT_HUMAN;sp|P00739|HPTR_HUMAN	58	72	no	2.1977e-61	236.12	71	-1.3265	A1;A10;A3;A4;A5;A6;A7;A8;A9;B10;B3;B6;B7;B8;B9	49084000	8382300	144360000	31175000	118750000	222950000	361850000	62205000	256580000	0	417560000	0	73905000	0	0	258810000	97283000	437730000	352850000	--	0.0200745	1.95332	--	--	0.861443	3.71956	0.142108	0.727165	1.39482e+08	0.8545	273023000	0.5794
285	MYGPGGGKYFSTTEDYDHEITGLR	M(ox)YGPGGGKYFSTTEDYDHEITGLR	1	2693.21	3;4	K	V	24	sp|Q96DA0|ZG16B_HUMAN	55	78	yes	2.2967e-61	222.72	46	-0.34125	A10;A3;A6;A7;A8;A9;B10;B6;B7;B8;B9	0	261080000	5441300000	0	0	1241600000	879000000	1898600000	617380000	0	7219800000	0	0	0	0	105850000	4234200000	153310000	447390000	--	0.0361617	--	--	--	11.7298	0.207595	12.3841	1.37996	1723160000	1.106	2432110000	1.3118
286	DQGNQEQDPNISNGEEEEEKEPGEVGTHNDNQER	DQGNQEQDPNISN(de)GEEEEEKEPGEVGTHNDNQER	1	3850.6	4	R	K	34	sp|Q14515|SPRL1_HUMAN	187	220	yes	3.0139e-61	197.83	7	-3.3237	A1;A10;A8;B1;B10;B7	11560000	13123000	0	0	0	0	0	34416000	0	18993000	39474000	0	0	0	0	0	48977000	0	0	0.608645	0.332447	--	--	--	--	--	--	--	1.96997e+07	0.6482	3.58147e+07	0.4278
287	EQLGPVTQEFWDNLEKETEGLR		1	2617.27	3	R	Q	22	sp|P02647|APOA1_HUMAN	86	107	yes	1.9386e-60	226.32	5	-1.2224	A1;A4;A5;A6;A7;B2	53660000	0	0	30695000	93176000	115880000	33364000	0	0	0	0	282490000	0	0	0	0	0	0	0	--	--	--	--	--	--	--	--	--	65355000	0.577	282490000	--
288	ASQSVSSSYLAWYQQKPGQAPR		1	2438.2	2;3	R	L	22	sp|P01619|KV320_HUMAN	45	66	yes	1.9945e-60	233.97	29	-0.86505	A1;A4;A5;A6;A7;A9;B1;B10;B2;B3;B4;B6;B7	176760000	0	0	66265000	99344000	184880000	0	0	499230000	34762000	118670000	57512000	204450000	202100000	0	194950000	56215000	0	0	5.08486	--	--	0.327882	--	0.948346	--	--	--	205295800	0.8373	1.24094e+08	0.6121
289	ELDLVSHHVR		0	1203.64	2;3;4	K	T	10	sp|P80303|NUCB2_HUMAN	91	100	yes	4.5161e-60	268	54	-0.81094	A1;A10;A3;A4;A5;A8;B1;B10;B2;B3;B4;B5;B6;B7;B8;B9	33700000	138090000	5822200	278630000	78963000	0	0	276280000	0	128460000	11802000	17484000	56562000	45587000	716740	6555400	351200000	441870000	171260000	0.262338	11.7006	0.102935	6.11205	110.17	--	--	0.625252	--	1.35248e+08	0.8791	123149714	1.2653
290	VPTADLEDVLPLAEDITNILSK		0	2365.26	2;3	K	C	22	sp|P02774|VTDB_HUMAN	243	264	yes	7.1613e-60	287.91	17	-0.84451	A3;A5;A6;A7;A9;B10;B2;B3;B4;B6	0	0	28637000	0	101320000	88190000	22214000	0	50261000	0	69633000	205480000	83186000	147540000	0	161600000	0	0	0	--	--	0.344253	--	--	0.54573	--	--	--	58124400	0.6077	133487800	0.4234
291	EGVQKEDIPPADLSDQVPDTESETR		1	2754.28	3	R	I	25	sp|P01024|CO3_HUMAN	955	979	yes	7.8996e-60	175	47	-1.5813	A7;A8;B10;B6;B7;B8;B9	0	0	0	0	0	0	57787000	13049000	0	0	24561000	0	0	0	0	0	0	63788000	180470000	--	--	--	--	--	--	--	0.204568	--	35418000	0.8932	8.96063e+07	0.905
292	KIEEQLTLEK		1	1229.69	2;3	K	L	10	sp|P30740|ILEU_HUMAN	245	254	yes	2.0828e-59	236.35	82	-0.36966	A1;A10;A3;A4;A5;A6;A7;A8;A9;B1;B10;B2;B3;B4;B5;B6;B7;B8;B9	202640000	229360000	893910000	221810000	257820000	667030000	830110000	516630000	1020000000	64310000	415690000	284160000	290480000	353840000	8391900	2209300000	378510000	76185000	159010000	3.15099	0.551757	3.07735	0.626865	30.7225	0.301919	2.1931	6.78126	6.41469	5.37701e+08	0.6054	423987690	1.5174
293	TYGADLASVDFQHASEDARK		1	2180.01	2;3;4	K	T	20	sp|P30740|ILEU_HUMAN	111	130	yes	1.0704e-56	196.06	50	-0.57819	A10;A3;A7;A8;A9;B10;B6;B7;B8;B9	0	106020000	193650000	0	0	0	468990000	376620000	878360000	0	282970000	0	0	0	0	1005700000	343040000	45732000	146430000	--	0.374669	--	--	--	--	1.36716	8.23537	5.9985	404728000	0.7443	364774400	1.0325
294	TKLEEHLEGIVNIFHQYSVR		1	2411.26	3;4;5	M	K	20	sp|P80511|S10AC_HUMAN	2	21	yes	2.8147e-56	234.36	9	-0.75962	A1;A4;A5;A6;A9;B2;B3;B4	68347000	0	0	50775000	195910000	47778000	0	0	60754000	0	0	28797000	428500000	854400000	0	0	0	0	0	--	--	--	0.0594277	--	--	--	--	--	84712800	0.7401	4.37232e+08	0.9443
295	ATNYNAGDRSTDYGIFQINSR	ATNYNAGDRSTDYGIFQIN(de)SR	1	2362.09	2;3	R	Y	21	sp|P61626|LYSC_HUMAN	60	80	yes	2.8892e-56	234.04	25	-0.91879	A3;A4;A5;A6;A7;B1;B10;B7;B8	0	0	666100000	21479000	21572000	2006500000	305220000	0	0	29377000	121330000	0	0	0	0	0	1262600000	163930000	0	--	--	--	--	--	--	0.241739	--	--	604174200	1.3696	394309250	1.4749
296	GNDISSGTVLSDYVGSGPPK	GN(de)DISSGTVLSDYVGSGPPK	0	1948.94	2	K	G	20	sp|P30086|PEBP1_HUMAN	94	113	yes	5.0455e-56	235.22	18	-3.628	A1;A4;A5;A9;B1;B2;B3;B4	40175000	0	0	62659000	86139000	0	0	0	128440000	16658000	0	54117000	70749000	90483000	0	0	0	0	0	2.41175	--	--	0.692495	--	--	--	--	--	79353250	0.4754	58001750	0.5399
297	LDIQGTGQLLFSVVINQLR	LDIQGTGQLLFSVVIN(de)QLR	0	2113.19	2;3	R	L	19	sp|P01833|PIGR_HUMAN	193	211	yes	5.5584e-56	300.33	38	-3.468	A4;A5;B2;B3;B4;B5	0	0	0	6377800	9214500	0	0	0	0	0	0	94870000	36196000	242550000	10961000	0	0	0	0	--	--	--	0.0262948	0.840662	--	--	--	--	7796150	0.2573	96144250	1.079
298	GPLLVQDVVFTDEMAHFDRER	GPLLVQDVVFTDEM(ox)AHFDRER	1	2473.21	3;4	R	I	21	sp|P04040|CATA_HUMAN	48	68	yes	6.0439e-56	222.25	14	-1.5092	A1;A10;A3;A5;A6;A7;A9;B2;B3;B4	86828000	165430000	42123000	0	120630000	84138000	89926000	0	261020000	0	0	65751000	235370000	86039000	0	0	0	0	0	--	--	0.178965	--	--	--	--	--	--	1.21442e+08	0.5947	1.29053e+08	0.7178
299	EDLIWELLNQAQEHFGKDK		1	2312.14	4	K	S	19	sp|P02787|TRFE_HUMAN	279	297	yes	6.4602e-56	185.33	2	-0.86655	B2;B4	0	0	0	0	0	0	0	0	0	0	0	61870000	0	45044000	0	0	0	0	0	--	--	--	--	--	--	--	--	--	0	--	53457000	0.2226
300	VPSTEAEALASSLMGLFEK		0	1978.99	2;3	K	R	19	sp|P50395|GDIB_HUMAN	119	137	yes	2.2915e-55	234.22	8	-1.1923	A5;B2;B3;B4	0	0	0	0	47795000	0	0	0	0	0	0	44616000	19225000	58008000	0	0	0	0	0	--	--	--	--	--	--	--	--	--	47795000	--	4.06163e+07	0.485
301	FTASAGIQVVGDDLTVTNPK		0	2032.05	2;3	K	R	20	sp|P06733|ENOA_HUMAN	307	326	yes	2.4377e-55	281.4	27	-0.593	A1;A4;A5;A8;B1;B2;B3;B4;B5;B7;B8;B9	51119000	0	0	65294000	45605000	0	0	96408000	0	37896000	0	77544000	76701000	95560000	274810	0	130650000	19505000	98078000	1.34893	--	--	0.683278	165.951	--	--	4.94273	--	64606500	0.3524	6.70261e+07	0.6575
302	QATVGDINTERPGMLDFTGK	QATVGDINTERPGM(ox)LDFTGK;(gl)QATVGDINTERPGM(ox)LDFTGK;(gl)QATVGDINTERPGMLDFTGK;QATVGDIN(de)TERPGMLDFTGK	1	2149.05	2;3	K	A	20	sp|P07108|ACBP_HUMAN	34	53	yes	2.6357e-55	268.17	113	-2.0625	A1;A10;A3;A4;A5;A6;A7;A8;A9;B1;B10;B2;B3;B4;B5;B6;B7;B9	304970000	111000000	197320000	370510000	534330000	98667000	144770000	561590000	1389900000	140140000	140260000	780970000	400740000	566590000	718260	268390000	235560000	0	107580000	2.17618	0.791387	0.492389	0.65393	743.923	0.367625	0.614578	--	12.9197	4.12562e+08	0.982	2.93439e+08	0.8477
303	ILLNPQDKDGSFSVVITGLR		1	2171.2	2;3;4	R	K	20	sp|P01833|PIGR_HUMAN	297	316	yes	2.6573e-55	278.33	138	-0.47423	A1;A10;A3;A4;A5;A6;A7;A8;A9;B1;B10;B2;B3;B4;B5;B6;B7;B8;B9	4199700000	1149100000	3674200000	4347100000	3525300000	2494900000	997610000	2383800000	7421000000	3729900000	3133200000	4196800000	5062500000	4793500000	11688000	4587000000	3516200000	122140000	696900000	1.12596	0.36675	0.725768	0.906874	301.617	0.543907	0.283718	19.5169	10.6486	3.35475e+09	0.5817	2984982800	0.6583
304	SDLGPSYGGWQVLDATPQER		0	2175.02	2;3	R	S	20	sp|Q08188|TGM3_HUMAN	341	360	yes	5.1596e-55	287.88	21	-0.1131	A1;A4;A5;B1;B2;B3;B4	43874000	0	0	69654000	75767000	0	0	0	0	62051000	0	14093000	64709000	150170000	0	0	0	0	0	0.707064	--	--	0.463834	--	--	--	--	--	6.30983e+07	0.2683	72755750	0.7781
305	QGPPLGGQQSQPSAGDGNQDDGPQQGPPQQGGQQQQGPPPPQGK	(gl)QGPPLGGQQSQPSAGDGNQDDGPQQGPPQQGGQQQQGPPPPQGK	0	4354	4	R	P	44	sp|P02810|PRPC_HUMAN	47	90	yes	7.1278e-55	169.35	30	-0.28114	A1;A4;B1;B9	128920000	0	0	44036000	0	0	0	0	0	19990000	0	0	0	0	0	0	0	0	340730000	6.44922	--	--	--	--	--	--	--	--	86478000	0.6941	180360000	1.2575
306	AFLASPEYVNLPINGNGKQ	AFLASPEYVNLPIN(de)GNGKQ(de);AFLASPEYVN(de)LPIN(de)GNGKQ(de)	1	2031.04	2;3	K	-	19	sp|P09211|GSTP1_HUMAN	192	210	yes	9.2364e-55	228.93	33	-1.2055	A1;A10;A3;A4;A5;A6;A7;A8;A9;B1;B2;B3;B4;B6;B7	71471000	190590000	48733000	124480000	201950000	47948000	70297000	174020000	196550000	67956000	0	225260000	190400000	245250000	0	200540000	150650000	0	0	1.05172	--	0.255951	0.507564	--	0.239094	0.466625	--	--	1.25115e+08	0.5314	1.80009e+08	0.3535
307	YPALHKPENQDIDWGALEGETREER		2	2952.4	3;4;5	R	T	25	sp|P13796|PLSL_HUMAN	374	398	yes	1.0103e-54	217.84	12	-1.5858	A10;A5;A6;A7;A8;A9;B10;B6;B7;B9	0	134310000	0	0	37301000	196220000	82986000	176850000	912530000	0	120300000	0	0	0	0	340640000	64139000	0	24352000	--	1.11646	--	--	--	0.576033	1.29385	--	37.4725	256699500	1.2724	137357750	1.0274
308	NKDQGTYEDYVEGLR	N(de)KDQGTYEDYVEGLR	1	1785.82	2;3	K	V	15	sp|P60660|MYL6_HUMAN	80	94	yes	1.159e-54	208.95	20	-4.096	A10;A3;A5;A6;A7;A8;A9;B10;B6;B9	0	0	0	0	18796000	275290000	72254000	36670000	299110000	0	52359000	0	0	0	0	147710000	0	0	14681000	--	--	--	--	--	1.86372	--	--	20.374	140424000	0.9658	7.15833e+07	0.9579
309	ANPTVTLFPPSSEELQANK		0	2042.03	2;3	K	A	19	sp|B9A064|IGLL5_HUMAN;sp|P0DOX8|IGL1_HUMAN;sp|P0CG04|IGLC1_HUMAN	113	131	yes	1.4091e-54	225.86	425	-1.4929	A1;A10;A3;A4;A5;A6;A7;A8;A9;B1;B10;B2;B3;B4;B5;B6;B7;B8;B9	259890000	1620500000	2468100000	219010000	272650000	1585800000	863330000	1271400000	2055100000	498930000	1666100000	184570000	408050000	710070000	127550	875000000	1480900000	394320000	605280000	0.520895	0.972631	6.04852	0.308434	2137.59	1.81234	0.582977	3.22428	3.39529	1.17953e+09	0.702	682334755	0.7808
310	ESPGQLSDYRVENSMYIINPWVYLER	ESPGQLSDYRVEN(de)SMYIINPWVYLER;ESPGQLSDYRVEN(de)SM(ox)YIINPWVYLER	1	3157.52	3	K	M	26	sp|Q6P5S2|LEG1H_HUMAN	35	60	yes	1.4856e-54	213.6	17	-3.167	A1;A3;A4;A5;B1;B2;B3;B4;B6	109600000	0	98531000	301330000	253860000	0	0	0	0	251920000	0	448240000	138810000	101630000	0	123650000	0	0	0	0.435059	--	0.709826	2.96497	--	--	--	--	--	190830250	0.5353	212850000	0.6757
311	FSGSIDSSSNSASLTISGLK	FSGSIDSSSN(de)SASLTISGLK	0	1956.96	2	R	T	20	sp|P01721|LV657_HUMAN	82	101	yes	1.6519e-54	227.42	5	-2.2978	A1;A5;B3	11995000	0	0	0	31522000	0	0	0	0	0	0	0	45967000	0	0	0	0	0	0	--	--	--	--	--	--	--	--	--	21758500	0.6346	45967000	--
312	HSGFSVTHPGYLGASTSHEHDLR		0	2491.16	3;4;5	R	L	23	sp|Q9UKR0|KLK12_HUMAN	88	110	yes	3.0947e-54	221.48	19	-0.70064	A1;A3;A4;A6;A7;A8;A9;B10;B2;B3;B4	10487000	0	191990000	111680000	0	204680000	237410000	44033000	18831000	0	171770000	73764000	93110000	53993000	0	0	0	0	0	--	--	2.06197	2.06842	--	--	--	--	--	1.17016e+08	0.8118	98159250	0.5257
313	DSATMSLDPEEEAEHPIK		0	1997.89	2;3	K	I	18	sp|Q08188|TGM3_HUMAN	537	554	yes	7.0405e-53	235.21	13	-0.36152	A1;A4;A5;B1;B2;B3;B4	36130000	0	0	60793000	71515000	0	0	0	0	46781000	0	24257000	41286000	182560000	0	0	0	0	0	0.772322	--	--	0.333003	--	--	--	--	--	56146000	0.3232	73721000	0.9928
314	QDPPSVVVTSHQAPGEK	(gl)QDPPSVVVTSHQAPGEK;QDPPSVVVTSHQ(de)APGEK	0	1774.88	2;3	R	K	17	sp|P25311|ZA2G_HUMAN	204	220	yes	1.3805e-52	298.12	420	-1.2918	A1;A10;A3;A4;A5;A6;A7;A8;A9;B1;B10;B2;B3;B4;B5;B6;B7;B8;B9	3813300000	1173700000	6674000000	4052400000	2731600000	4036600000	2335100000	1840400000	8115900000	3225400000	3151700000	3065900000	2074500000	3204400000	21986000	4258100000	2998800000	673430000	809320000	1.18227	0.372402	3.21716	1.26464	124.243	0.947981	0.778678	2.73287	10.028	3.86367e+09	0.5859	2348353600	0.592
315	QVFGEATKQPGITFIAAK	(gl)QVFGEATKQPGITFIAAK	1	1905.04	2	R	F	18	sp|P07339|CATD_HUMAN	177	194	yes	3.0844e-52	224.16	1	-0.3208	B6	0	0	0	0	0	0	0	0	0	0	0	0	0	0	0	143350000	0	0	0	--	--	--	--	--	--	--	--	--	0	--	143350000	--
316	GPYPPGPLAPPQPFGPGFVPPPPPPPYGPGR		0	3100.6	2;3;4;5	R	I	31	sp|P02814|SMR3B_HUMAN	28	58	yes	5.0261e-52	296.13	13	-0.47596	A1;B1;B3	529890000	0	0	0	0	0	0	0	0	964720000	0	0	48558000	0	0	0	0	0	0	0.549268	--	--	--	--	--	--	--	--	529890000	--	506639000	1.2787
317	GEADAMSLDGGYVYTAGK	GEADAM(ox)SLDGGYVYTAGK	0	1803.8	2;3	K	C	18	sp|P02788|TRFL_HUMAN	406	423	yes	5.3532e-52	228.7	91	-0.90517	A1;A10;A3;A4;A5;A6;A7;A8;A9;B1;B10;B2;B3;B4;B5;B6;B7;B9	441560000	61698000	370820000	536360000	899190000	3593800000	180000000	246650000	327060000	176130000	341380000	203690000	1435100000	1847600000	2885700	0	469010000	0	83450000	2.50701	0.180731	0.258393	0.290301	311.602	--	0.383787	--	3.91923	739682000	1.4828	5.69906e+08	1.2031
318	EVWEETDGLDPNDFDPK	EVWEETDGLDPN(de)DFDPK	0	2004.86	2	K	T	17	sp|P80303|NUCB2_HUMAN	231	247	yes	5.7889e-52	233.37	22	-1.8818	A1;A4;A5;A8;A9;B1;B2;B3;B4;B7	19469000	0	0	283790000	34317000	0	0	85203000	81437000	136060000	0	10667000	22823000	79978000	0	0	97001000	0	0	0.143091	--	--	3.54835	--	--	--	--	--	100843200	1.0534	69305800	0.7545
319	FSGWYDADLSPAGHEEAK		0	1978.87	2;3	R	R	18	sp|P18669|PGAM1_HUMAN	22	39	yes	9.9351e-52	226.85	22	-1.2028	A1;A10;A3;A4;A5;A6;A7;A8;A9;B1;B10;B2;B3;B4;B5;B6;B7;B8;B9	48954000	27795000	86000000	61697000	62512000	148920000	82449000	154390000	727750000	24120000	100770000	80164000	77392000	38073000	841870	291830000	94317000	10922000	68874000	2.0296	0.275826	1.11123	1.62049	74.2537	0.510297	0.874169	14.1357	10.5664	1.55607e+08	1.4057	78730387	1.0503
320	LYGSEAFATDFQDSAAAK		0	1890.86	2	R	K	18	sp|P01011|AACT_HUMAN	160	177	yes	1.1727e-51	225.23	11	-1.2393	A10;A3;A4;A5;A6;A7;A8;B10;B6;B7;B8;B9	0	0	86372000	6450200	20993000	155300000	82190000	65475000	0	0	131530000	0	0	0	0	121450000	62239000	158390000	163790000	--	--	--	--	--	1.27872	1.32055	0.413378	--	6.94634e+07	0.7659	127479800	0.3182
321	EQTFGGVNYFFDVEVGR	EQTFGGVN(de)YFFDVEVGR	0	1962.91	2;3	R	T	17	sp|P01036|CYTS_HUMAN	75	91	yes	2.1459e-51	275.63	549	-2.3004	A1;A10;A3;A4;A5;A6;A7;A8;A9;B1;B10;B2;B3;B4;B5;B6;B7	2322300000	283320000	1068600000	4752500000	6551000000	837380000	115010000	30818000	3971000000	5703300000	255340000	4480300000	5169500000	2904800000	186200000	3163600000	303630000	0	0	0.407185	1.10958	0.206712	1.63609	35.1826	0.264692	0.378783	--	--	2.21466e+09	1.0645	2770833750	0.8246
322	PQGPPQQGGHPPPPQGRPQGPPQQGGHPRPPR	PQGPPQQGGHPPPPQ(de)GRPQGPPQQGGHPRPPR	2	3317.68	4;5;6	K	G	32	sp|P02810|PRPC_HUMAN	91	122	yes	2.2681e-51	190.5	106	-3.0884	A1;A10;A3;A8;B1;B3;B4;B6;B7;B9	57286000	22876000	1672100	0	0	0	0	68945000	0	4479200	0	0	1533300	1699600	0	4222400	353740000	0	464540000	12.7893	--	1.09052	--	--	--	--	--	--	37694775	0.8216	1.38369e+08	1.5368
323	SGQSEDRQPVPGQQMTLK	SGQSEDRQPVPGQQM(ox)TLK	1	1984.96	2;3	K	I	18	sp|P01024|CO3_HUMAN	567	584	yes	3.0542e-51	221.78	101	-0.7777	A1;A10;A3;A4;A5;A6;A7;A8;A9;B1;B10;B2;B3;B4;B5;B6;B7;B8;B9	226650000	119810000	652440000	32530000	133700000	879190000	1433400000	228510000	1187600000	14676000	726410000	83799000	140640000	178580000	3445100	1502500000	375930000	476320000	741030000	15.4436	0.164934	4.63908	0.182159	38.8087	0.585151	3.81294	0.479741	1.60263	5.43759e+08	0.9511	424333010	1.1
324	HGESAWNLENR		0	1311.6	2;3	R	F	11	sp|P18669|PGAM1_HUMAN	11	21	yes	3.0595e-51	265.55	24	-0.62375	A10;A4;A5;A8;B1;B2;B3;B4;B5	0	43378000	0	83663000	102600000	0	0	26634000	0	33478000	0	82802000	63178000	60007000	4723400	0	0	0	0	--	--	--	1.39422	21.7216	--	--	--	--	64068750	0.548	48837680	0.6199
325	TGPAATTLPDGAAAESLVESSEVAVIGFFK		0	2934.49	2;3	R	D	30	sp|P07237|PDIA1_HUMAN	133	162	yes	3.0858e-51	224.89	9	-0.74575	A3;A4;A5;A9;B1;B2;B3;B4;B6	0	0	29596000	20390000	112370000	0	0	0	203980000	31051000	0	23575000	43417000	92964000	0	79258000	0	0	0	--	--	0.681668	0.219332	--	--	--	--	--	91584000	0.9345	54053000	0.5642
326	QQMILQIGVVNEAPFSR		0	1929.01	2	K	E	17	sp|Q02487|DSC2_HUMAN	429	445	yes	3.1113e-51	222.54	4	-2.5224	A4;B3;B4	0	0	0	29279000	0	0	0	0	0	0	0	0	34096000	82860000	0	0	0	0	0	--	--	--	0.353355	--	--	--	--	--	29279000	--	58478000	0.5896
327	SLLFMQWGQIVDHDLDFAPDTELGSSEYSK	SLLFM(ox)QWGQIVDHDLDFAPDTELGSSEYSK	0	3427.59	3;4	R	A	30	sp|P22079|PERL_HUMAN	214	243	yes	3.2958e-51	198.06	10	-1.501	A1;A4;A5;B1;B2;B3;B4	96618000	0	0	627990000	296900000	0	0	0	0	281830000	0	189110000	194520000	298300000	0	0	0	0	0	0.342824	--	--	2.10523	--	--	--	--	--	3.40503e+08	0.7881	240940000	0.2373
328	EADVDQDGRVNYEEFAR		1	2011.89	2;3	R	M	17	sp|Q9NZT1|CALL5_HUMAN	125	141	yes	3.8774e-51	255.34	43	-1.1327	A1;A10;A3;A4;A5;A6;A7;A8;A9;B10;B3;B4;B5;B6;B7;B8;B9	10635000	72821000	242180000	13504000	28557000	127030000	89485000	152340000	328540000	0	27445000	0	18021000	15518000	434870	371610000	163310000	68345000	132410000	--	2.65334	13.4388	0.870215	65.6679	0.341837	0.547946	2.22899	2.48123	1.18344e+08	0.9175	9.96367e+07	1.2516
329	HLEIIYEINQK		0	1398.75	2;3	R	H	11	sp|P06737|PYGL_HUMAN	400	410	yes	4.2694e-51	230.06	15	-0.96682	A1;A3;A4;A5;A7;A9;B3;B6	14753000	0	27648000	0	18405000	0	27744000	0	268440000	0	0	0	27695000	0	0	154760000	0	0	0	--	--	0.998303	--	--	--	--	--	--	71398000	1.5448	91227500	0.9849
330	DPASDQMQHWK		0	1341.58	2	R	E	11	sp|P04040|CATA_HUMAN	6	16	yes	4.7002e-51	229.48	3	-0.60803	A5;A9;B3;B4	0	0	0	0	9579500	0	0	0	64029000	0	0	0	8024100	11059000	0	0	0	0	0	--	--	--	--	--	--	--	--	--	36804250	1.0461	9541550	0.2249
331	IYVSDDGKAHFSISNSAEDPFIAIHAESKL	IYVSDDGKAHFSISN(de)SAEDPFIAIHAESKL	2	3260.6	3;4;5	K	-	30	sp|P04745|AMY1_HUMAN;sp|P19961|AMY2B_HUMAN;sp|P04746|AMYP_HUMAN	482	511	no	4.9992e-51	196.93	132	-1.7383	A10;A3;A6;A7;A8;A9;B10;B6;B7;B8;B9	0	322440000	1677100000	0	0	2963200000	3920800000	3354100000	2868100000	0	2167200000	0	0	0	0	1905400000	6341700000	50166000	65846000	--	0.148782	--	--	--	1.55516	0.618257	66.86	43.5577	2.51762e+09	0.5184	2106062400	1.2192
332	ATEDEGSEQKIPEATNR	ATEDEGSEQKIPEATN(de)R	1	1873.87	2;3	K	R	17	sp|P01008|ANT3_HUMAN	62	78	yes	5.6388e-51	223.58	64	-1.3678	A1;A10;A3;A4;A5;A6;A7;A8;A9;B1;B10;B2;B3;B4;B6;B7;B8;B9	13752000	22450000	29565000	10502000	13828000	49628000	108450000	28802000	2923000	2999100	101040000	6762700	15418000	8081200	0	123310000	66964000	105260000	209130000	4.58538	0.222189	1.91756	1.29956	--	0.402465	1.61953	0.273627	0.013977	31100000	1.0311	7.09961e+07	0.9923
333	WMQVSNPEAGETVPGGQAQTGASTESGRQEWSSTHPR	WM(ox)QVSNPEAGETVPGGQAQTGASTESGRQEWSSTHPR	1	3939.78	4	R	R	37	sp|Q9UBG3|CRNN_HUMAN	387	423	yes	6.0597e-51	178.76	18	-0.53817	A10;A3;A6;A8;B7;B8;B9	0	43096000	35993000	0	0	81897000	0	98318000	0	0	0	0	0	0	0	0	261080000	13542000	134380000	--	--	--	--	--	--	--	7.26023	--	64826000	0.4642	136334000	0.9079
334	IVSQEPAGTPMFLLSR	IVSQEPAGTPM(ox)FLLSR	0	1744.92	2;3	K	N	16	sp|P32926|DSG3_HUMAN	198	213	yes	6.4996e-51	234.92	36	-0.28493	A1;A10;A3;A4;A5;A6;A7;A8;A9;B1;B10;B2;B3;B4;B6;B7;B8;B9	23411000	128610000	58081000	46865000	39325000	44224000	73810000	236180000	102930000	17585000	68536000	12592000	51666000	176880000	0	115980000	447440000	22949000	13298000	1.33131	1.87653	1.12416	0.264954	--	0.381307	0.164961	10.2915	7.74026	8.37151e+07	0.7891	1.02992e+08	1.3646
335	LSDEEVDEMIR	LSDEEVDEM(ox)IR	0	1334.6	2	K	A	11	sp|P27482|CALL3_HUMAN	117	127	yes	6.8361e-51	226.59	21	-0.94791	A1;A10;A3;A4;A5;A6;A7;A8;A9;B1;B2;B3;B4;B5;B6;B7	26238000	68913000	246250000	52957000	90325000	112480000	64068000	163680000	294640000	35406000	0	53496000	50257000	106100000	515930	172850000	82240000	0	0	0.741061	--	4.89981	0.499123	175.072	0.650738	0.779037	--	--	1.24395e+08	0.7419	7.15521e+07	0.7803
336	MLDAEDIVGTARPDEK		1	1758.85	2;3	K	A	16	sp|P12814|ACTN1_HUMAN	221	236	yes	7.3812e-51	235.31	25	-1.298	A1;A10;A3;A4;A5;A6;A7;A8;A9;B10;B2;B3;B4;B5;B6;B7	33014000	97585000	61952000	15362000	50877000	51743000	124290000	71143000	294400000	0	86359000	52410000	110520000	20885000	563980	573870000	72443000	0	0	--	1.12999	0.56055	0.735552	90.2106	0.090165	1.71569	--	--	8.89296e+07	0.9405	1.31007e+08	1.518
337	AIGYLNTGYQR	AIGYLN(de)TGYQR	0	1254.64	2	K	Q	11	sp|P01023|A2MG_HUMAN	1004	1014	yes	1.0086e-50	222.19	120	-4.3588	A1;A10;A3;A4;A5;A6;A7;A8;A9;B1;B10;B2;B3;B4;B5;B6;B7;B8;B9	310620000	589290000	523100000	73478000	233970000	1437300000	1467900000	207980000	1428500000	18265000	1172400000	342620000	315450000	228040000	5852100	2346800000	98336000	1097400000	807340000	17.0063	0.502636	1.65827	0.322215	39.9805	0.612451	14.9274	0.189521	1.76939	6.96904e+08	0.8353	643250310	1.1447
338	SMQGGLVGNDETVALTAFVTIALHHGLAVFQDEGAEPLK		0	4035.04	4	R	Q	39	sp|P0C0L4|CO4A_HUMAN;sp|P0C0L5|CO4B_HUMAN	1127	1165	no	1.1899e-50	173.08	1	-0.83335	B2;B3;B4	0	0	0	0	0	0	0	0	0	0	0	10167000	6290700	29516000	0	0	0	0	0	--	--	--	--	--	--	--	--	--	0	--	1.53246e+07	0.8119
339	SFEDRYDYYSK		1	1471.63	2;3	K	A	11	sp|Q6P5S2|LEG1H_HUMAN	221	231	yes	1.2322e-50	227.36	161	-0.72096	A1;A10;A3;A4;A5;A6;A7;A8;A9;B1;B10;B2;B3;B4;B5;B6;B7;B8;B9	1573300000	945760000	7063400000	2394500000	1689600000	3738500000	1103300000	594490000	7341800000	2486700000	2529300000	2086000000	1230900000	1376000000	93885000	3111300000	2375300000	546730000	603590000	0.632686	0.373922	5.7384	1.74019	17.9965	1.20159	0.464489	1.08736	12.1636	2.93829e+09	0.8809	1643970500	0.6186
340	VGKETVQTTEDQILKR		2	1844	3;4	R	D	16	sp|P18206|VINC_HUMAN	57	72	yes	1.3874e-50	229.54	10	-0.96958	A10;A8;A9;B6;B7;B9	0	33845000	0	0	0	0	0	67568000	201600000	0	0	0	0	0	0	152080000	24248000	0	33125000	--	--	--	--	--	--	--	--	6.08604	1.01004e+08	0.8785	6.98177e+07	1.0224
341	AAQKADVLTTGAGNPVGDKLNVITVGPR		2	2761.51	3;4	R	G	28	sp|P04040|CATA_HUMAN	20	47	yes	1.9141e-50	193.9	9	-0.58023	A10;A7;A9;B10;B6;B8;B9	0	318020000	0	0	0	0	76367000	0	180290000	0	120310000	0	0	0	0	574920000	0	41394000	121240000	--	2.64334	--	--	--	--	--	--	1.48705	191559000	0.6328	214466000	1.134
342	LVGRDPKNNLEALEDFEK	LVGRDPKN(de)NLEALEDFEK	2	2086.07	2;3;4	K	A	18	sp|P31025|LCN1_HUMAN	133	150	yes	1.9347e-50	229.23	53	-4.0075	A10;A4;A5;A6;A7;A8;A9;B10;B2;B3;B4;B6;B7;B8;B9	0	1704200000	0	24171000	15760000	2224100000	820800000	1190000000	347950000	0	410260000	67036000	90990000	10137000	0	2581900000	2991900000	176380000	552520000	--	4.15395	--	2.38443	--	0.86142	0.274341	6.7468	0.629751	9.03854e+08	0.9414	860140375	1.4045
343	AHYGGFTVQNEANK	AHYGGFTVQN(de)EANK	0	1534.72	2;3	K	Y	14	sp|P02675|FIBB_HUMAN	354	367	yes	3.1611e-50	234.65	7	-0.18475	A1;A5;B3	22639000	0	0	0	38145000	0	0	0	0	0	0	0	16730000	0	0	0	0	0	0	--	--	--	--	--	--	--	--	--	30392000	0.3608	16730000	--
344	RIQLVEEELDRAQER		2	1882.99	3;4	R	L	15	sp|P06753|TPM3_HUMAN;sp|P67936|TPM4_HUMAN;sp|P09493|TPM1_HUMAN	92	106	no	3.1844e-50	188.9	29	-0.50399	A1;A10;A3;A4;A5;A6;A7;A8;A9;B10;B2;B3;B4;B6;B7;B9	42381000	238710000	181940000	10338000	39754000	141620000	237120000	430730000	686850000	0	206040000	14339000	51309000	16795000	0	422860000	830230000	0	289400000	--	1.15856	3.54597	0.61554	--	0.33491	0.285608	--	2.37336	2.23271e+08	0.9742	2.61568e+08	1.1239
345	SPEQQETVLDGNLIIR		0	1810.94	2;3	K	Y	16	sp|Q14624|ITIH4_HUMAN	225	240	yes	5.0179e-50	274	6	-0.55499	A7;B10;B2;B3;B8;B9	0	0	0	0	0	0	0	0	0	0	28747000	12018000	14395000	0	0	0	0	111870000	97814000	--	--	--	--	--	--	--	--	--	0	--	52968800	0.907
346	NQVALNPQNTVFDAKR	N(de)QVALNPQNTVFDAKR	1	1813.94	2;3	K	L	16	sp|P0DMV9|HS71B_HUMAN;sp|P0DMV8|HS71A_HUMAN	57	72	yes	5.6488e-50	226.04	14	-1.3259	A10;A8;A9;B6;B7;B8;B9	0	13953000	0	0	0	0	0	19058000	302460000	0	0	0	0	0	0	543110000	206030000	29727000	119480000	--	--	--	--	--	--	--	0.641101	2.53147	1.11824e+08	1.4766	224586750	0.9984
347	KKELEEIVQPIISK		2	1652.97	2;3;4	K	L	14	sp|P11021|BIP_HUMAN	620	633	yes	5.9981e-50	267.23	32	-0.25963	A10;A3;A4;A5;A6;A7;A8;A9;B10;B3;B4;B6;B7	0	115960000	203860000	23842000	52608000	103680000	163420000	185860000	434200000	0	0	0	16304000	17067000	0	670530000	476570000	0	0	--	--	12.5037	1.39696	--	0.154624	0.342909	--	--	160428750	0.7919	295117750	1.122
348	FGVEQDVDMVFASFIR		0	1858.89	2;3	K	K	16	sp|P14618|KPYM_HUMAN	231	246	yes	6.0221e-50	227.31	12	-0.60481	A1;A4;A5;A9;B2;B3;B4;B6	2081900	0	0	16354000	65006000	0	0	0	202280000	0	0	3938900	28491000	45430000	0	19270000	0	0	0	--	--	--	0.359982	--	--	--	--	--	71430475	1.2781	24282475	0.7148
349	EQDRAHQTGETVTGSGTQTQAGATQTVEQDSSHQTGR		1	3883.76	4	R	T	37	sp|Q9UBG3|CRNN_HUMAN	216	252	yes	6.3002e-50	171.2	2	-2.0336	B8;B9	0	0	0	0	0	0	0	0	0	0	0	0	0	0	0	0	0	18892000	18757000	--	--	--	--	--	--	--	--	--	0	--	18824500	0.0051
350	AAPEASGTPSSDAVSR		0	1501.7	2;3	R	L	16	sp|P31146|COR1A_HUMAN	417	432	yes	6.4292e-50	226.73	51	-0.83078	A1;A10;A3;A4;A5;A6;A7;A8;A9;B1;B10;B2;B3;B4;B6;B7;B8;B9	16990000	11215000	24476000	35486000	41171000	16880000	38233000	13867000	5287400	3335400	26870000	34939000	43749000	27329000	0	55678000	20574000	7973300	23766000	5.09384	0.41738	0.559464	1.29847	--	0.303172	1.85832	1.73918	0.222477	2.26228e+07	0.5697	2.71349e+07	0.6027
351	RSDTSLTWNSVK	RSDTSLTWN(de)SVK	1	1392.7	2;3	R	G	12	sp|P02788|TRFL_HUMAN	462	473	yes	7.6463e-50	226.33	236	-2.9295	A1;A10;A3;A4;A5;A6;A7;A8;A9;B1;B10;B2;B3;B4;B5;B6;B7;B8;B9	191660000	242820000	1335900000	233660000	231840000	2409600000	815880000	694130000	1327200000	48963000	663230000	64672000	363040000	596400000	7088600	558940000	919750000	135310000	258940000	3.91438	0.366117	3.67976	0.391784	32.706	4.31102	0.887067	5.12992	5.12551	831410000	0.9003	361633360	0.8597
352	VNDDIIVNWVNETLR		0	1798.92	2;3	K	E	15	sp|P13796|PLSL_HUMAN	516	530	yes	8.0041e-50	231.06	7	-2.9061	A1;A4;A5;A6;A7;B10;B2;B3;B4	33440000	0	0	30907000	73779000	64513000	39693000	0	0	0	25581000	165690000	145880000	16870000	0	0	0	0	0	--	--	--	1.83207	--	--	--	--	--	48466400	0.4008	88505250	0.8834
353	STDYGIFQINSR	STDYGIFQIN(de)SR	0	1399.67	1;2;3	R	Y	12	sp|P61626|LYSC_HUMAN	69	80	yes	8.5994e-50	230.65	227	-2.8529	A1;A10;A3;A4;A5;A6;A7;A8;A9;B1;B10;B2;B3;B4;B5;B7;B8;B9	1435400000	827580000	4509200000	8683800000	7159000000	9698800000	1566900000	418870000	938340000	15562000000	1573700000	1303900000	4595100000	2619800000	130120000	0	3337800000	1193500000	82249000	0.0922375	0.525882	0.981306	3.31468	55.0184	--	0.469441	0.350959	11.4085	3.91532e+09	0.9443	3.37757e+09	1.4209
354	LQHLENELTHDIITK	LQHLEN(de)ELTHDIITK	0	1802.95	2;3;4	K	F	15	sp|P01009|A1AT_HUMAN	284	298	yes	9.9738e-50	229.89	190	-0.95185	A1;A10;A3;A4;A5;A6;A7;A8;A9;B1;B10;B2;B3;B4;B6;B7;B8;B9	508120000	127580000	1057000000	158090000	697490000	2406500000	1123100000	387070000	739070000	183180000	960960000	672120000	894640000	364180000	0	529080000	138410000	238990000	598090000	2.77388	0.132763	1.18148	0.434099	--	4.54846	8.1143	1.61961	1.23572	8.00447e+08	0.8706	508850000	0.5917
355	NGVAQEPVHLDSPAIK	N(de)GVAQEPVHLDSPAIK	0	1673.87	2;3	K	H	16	sp|P04217|A1BG_HUMAN	63	78	yes	1.015e-49	229.9	71	-0.95563	A1;A10;A3;A4;A5;A6;A7;A8;A9;B1;B10;B2;B3;B4;B6;B8;B9	91072000	53285000	128800000	13511000	73937000	245900000	233320000	86850000	368370000	15582000	72107000	99635000	86680000	76659000	0	360800000	0	151400000	172200000	5.84469	0.738971	1.48593	0.176248	--	0.681541	--	0.573646	2.1392	1.43894e+08	0.7968	129382875	0.8137
356	ASHEEVEGLVEK		0	1325.65	2;3	R	I	12	sp|Q08380|LG3BP_HUMAN	334	345	yes	1.0839e-49	226.71	104	-3.0931	A1;A10;A3;A4;A5;A6;A7;A8;A9;B1;B10;B2;B3;B4;B5;B6;B7;B8;B9	322220000	398560000	1376400000	711720000	596470000	134320000	88216000	803080000	42312000	427400000	2129800000	196940000	426980000	1019600000	8495800	277270000	1872500000	487730000	551400000	0.753907	0.187135	3.22357	0.698038	70.2076	0.484438	0.0471113	1.64657	0.0767356	4.97033e+08	0.862	739811580	0.9696
357	LTNDYELNITNR	LTN(de)DYELNITNR	0	1464.72	2	K	L	12	sp|Q9UIV8|SPB13_HUMAN	96	107	yes	1.2605e-49	225.22	38	-0.42156	A1;A10;A3;A4;A5;A6;A7;A8;A9;B1;B2;B3;B4;B6;B7	14745000	19331000	94270000	20130000	55989000	55338000	35327000	105360000	446680000	13423000	0	13035000	30273000	81871000	0	165520000	80961000	0	0	1.09849	--	3.114	0.245875	--	0.334328	0.436346	--	--	94130000	1.446	64180500	0.914
358	GLDYASQQGTAALQK		0	1549.77	2	K	E	15	sp|P17213|BPI_HUMAN	44	58	yes	1.3225e-49	227.94	18	-0.36906	A10;A3;A4;A5;A6;A9;B10;B2;B3;B4;B5;B6;B8	0	15566000	70417000	7523000	19824000	70315000	0	0	41656000	0	73517000	2886400	19153000	7676900	2948800	75581000	0	0	0	--	0.211733	3.67655	0.979953	6.72273	0.930326	--	--	--	3.75502e+07	0.7409	30293850	1.1486
359	DAESIHQYLLQR		0	1471.74	2;3	R	K	12	sp|P55786|PSA_HUMAN	901	912	yes	1.4311e-49	223.78	11	-0.86871	A4;A5;A7;A8;A9;B6;B7	0	0	0	8880300	8614300	0	29469000	103870000	52938000	0	0	0	0	0	0	0	94842000	0	0	--	--	--	--	--	--	0.310717	--	--	40754320	0.9744	94842000	--
360	GWEEGVAQMSVGQR		0	1532.7	2	R	A	14	sp|P62942|FKB1A_HUMAN	59	72	yes	1.4372e-49	230.41	17	-0.44177	A1;A4;A5;A8;A9;B1;B2;B3;B4;B6	49700000	0	0	49471000	89734000	0	0	46834000	279440000	16667000	0	120400000	110710000	62472000	0	143870000	0	0	0	2.98194	--	--	0.791891	--	--	--	--	--	103035800	0.9726	90823800	0.5611
361	APEDAGPQPGSYEIR		0	1585.74	2	K	H	15	sp|Q9Y5Z4|HEBP2_HUMAN	27	41	yes	1.5249e-49	226.73	23	-2.2117	A1;A10;A3;A4;A5;A6;A7;A8;A9;B2;B3;B4;B6;B7	24899000	19686000	0	16032000	21318000	0	51098000	36110000	168940000	0	0	15353000	10406000	39842000	0	144300000	22578000	0	0	--	--	--	0.402389	--	--	2.26318	--	--	4.82976e+07	1.1292	46495800	1.2001
362	TEVSSNHVLIYLDK	TEVSSN(de)HVLIYLDK	0	1616.84	2;3	R	V	14	sp|P01023|A2MG_HUMAN	1408	1421	yes	2.057e-49	228.07	64	-2.4656	A1;A10;A3;A4;A5;A6;A7;A9;B1;B10;B2;B3;B4;B5;B6;B8;B9	150030000	28721000	23726000	64878000	157560000	80188000	185090000	0	203770000	13613000	95127000	171900000	155630000	126420000	1424400	108690000	0	86620000	147380000	11.0211	0.301923	0.152451	0.513194	110.615	0.737768	--	--	1.38262	111745375	0.635	1.00756e+08	0.5941
363	VLHFDQVTENTTGK		0	1587.79	2;3	K	A	14	sp|P29508|SPB3_HUMAN	56	69	yes	2.0662e-49	269.81	49	-1.8244	A1;A10;A3;A5;A6;A7;A8;A9;B2;B4;B5;B6;B7;B8;B9	13707000	70877000	249410000	0	13112000	156640000	160330000	86607000	495670000	0	0	8561000	0	21588000	423130	339020000	341740000	39696000	142350000	--	--	--	--	30.9881	0.462038	0.469158	2.18176	3.48205	155794125	1.0202	1.27625e+08	1.1972
364	YAGKDGYNYTLSK	YAGKDGYN(de)YTLSK	1	1478.7	2;3	K	T	13	sp|P31949|S10AB_HUMAN	24	36	yes	2.3436e-49	247.29	40	-2.8268	A10;A3;A6;A7;A8;A9;B10;B6;B7;B8;B9	0	153270000	91828000	0	0	167990000	255340000	116990000	120900000	0	164670000	0	0	0	0	944500000	138880000	33144000	100730000	--	0.930771	--	--	--	0.177861	1.83857	3.52975	1.20024	151053000	0.3831	276384800	1.3632
365	NYHMYVYPVHWQFSELDQHPMDR		0	2991.32	4;5	K	V	23	sp|Q14515|SPRL1_HUMAN	584	606	yes	3.0063e-49	220.73	17	-1.4033	A1;A4;A5;B1;B2;B3;B4	36896000	0	0	219780000	86852000	0	0	0	0	226780000	0	91239000	53967000	72594000	0	0	0	0	0	0.162695	--	--	3.02752	--	--	--	--	--	1.14509e+08	0.8255	111145000	0.707
366	ELSEALGQIFDSQR		0	1591.78	2;3	R	G	14	sp|Q08380|LG3BP_HUMAN	138	151	yes	3.0196e-49	261.52	24	-0.46232	A1;A10;A3;A4;A5;A6;A7;A8;A9;B1;B10;B2;B3;B4;B6;B7;B8;B9	302900000	85524000	138150000	395460000	80739000	129730000	71186000	70956000	160770000	276790000	173200000	176090000	276730000	688410000	0	150820000	199180000	5005200	0	1.09433	0.493788	0.499223	0.574454	--	0.860164	0.357395	14.1765	--	1.59491e+08	0.718	243278150	0.8178
367	VMQHQYQVSNLGQR		0	1686.83	2;3	R	S	14	sp|P11215|ITAM_HUMAN	950	963	yes	3.167e-49	223.87	5	-0.53092	A1;A10;A4;A5;A6;A7;A8;A9;B6;B7	19769000	7145500	0	24747000	17965000	48362000	102640000	11564000	51440000	0	0	0	0	0	0	165170000	19376000	0	0	--	--	--	--	--	0.292801	5.29727	--	--	3.54541e+07	0.8903	92273000	1.1172
368	KVESLQEEIAFLK		1	1532.85	2;3	R	K	13	sp|P08670|VIME_HUMAN	223	235	yes	3.5823e-49	220.66	17	-0.32101	A1;A10;A4;A5;A6;A7;A9;B1;B2;B3;B4;B6;B9	30802000	86740000	0	9383100	30631000	111970000	87122000	0	0	43514000	0	90955000	131490000	24765000	0	697170000	0	0	85173000	0.707864	--	--	0.378886	--	0.160606	--	--	--	59441350	0.6906	178844500	1.4353
369	TEGDGVYTLNNEK	TEGDGVYTLN(de)NEK	0	1438.66	2	R	Q	13	sp|P00738|HPT_HUMAN	119	131	yes	3.8091e-49	224.75	58	-1.0172	A1;A3;A4;A5;A6;A7;A8;A9;B10;B2;B3;B4;B5;B6;B7;B8;B9	138310000	0	91801000	14260000	141410000	286680000	586350000	65388000	216290000	0	203180000	5864300	92973000	209230000	2835800	246420000	53823000	88374000	91860000	--	--	0.987394	0.0681547	49.866	1.16338	10.894	0.739901	2.35456	192561125	0.9376	1.10507e+08	0.8075
370	MQKEITALAPSTMK	M(ox)QKEITALAPSTMK;M(ox)QKEITALAPSTM(ox)K	1	1547.81	2;3	R	I	14	sp|P63261|ACTG_HUMAN;sp|P60709|ACTB_HUMAN;sp|P68133|ACTS_HUMAN;sp|P68032|ACTC_HUMAN;sp|P63267|ACTH_HUMAN;sp|P62736|ACTA_HUMAN	313	326	no	4.1147e-49	227.93	135	-1.413	A10;A3;A6;A7;A8;A9;B10;B6;B7;B8;B9	0	440000000	277040000	0	0	181840000	1485400000	1339900000	4191600000	0	1642700000	0	0	0	0	4402900000	1350200000	352070000	2520300000	--	0.267852	--	--	--	0.0413001	1.10013	3.80578	1.66314	1.3193e+09	1.1461	2053634000	0.7423
371	QEYDESGPSIVHR	(gl)QEYDESGPSIVHR	0	1515.7	2;3	K	K	13	sp|P63261|ACTG_HUMAN;sp|P60709|ACTB_HUMAN;sp|Q9BYX7|ACTBM_HUMAN;sp|Q6S8J3|POTEE_HUMAN;sp|A5A3E0|POTEF_HUMAN;sp|P0CG38|POTEI_HUMAN;sp|P0CG39|POTEJ_HUMAN	360	372	no	4.4149e-49	244.01	113	-0.46456	A1;A10;A3;A4;A5;A6;A7;A8;A9;B1;B10;B2;B3;B4;B5;B6;B7;B8;B9	678390000	53996000	284770000	473160000	780430000	796360000	170410000	268630000	2411300000	221230000	395010000	257170000	690280000	899020000	15947000	291400000	146220000	31950000	285680000	3.06645	0.136695	0.412543	0.526306	48.939	2.73288	1.16544	8.40782	8.44056	657494000	1.0803	323390700	0.8619
372	ALTSELANARDESK		1	1503.75	2;3	K	K	14	sp|P26038|MOES_HUMAN	524	537	yes	5.5939e-49	270.02	10	-0.39539	A10;A7;A8;A9;B10;B7;B8;B9	0	54297000	0	0	0	0	104530000	38444000	51659000	0	72647000	0	0	0	0	0	86200000	28599000	159650000	--	0.747409	--	--	--	--	1.21265	1.34424	0.323577	62232500	0.4666	86774000	0.6275
373	QVGSGVTTDQVQAEAKESGPTTYK	(gl)QVGSGVTTDQVQAEAKESGPTTYK	1	2480.2	3	K	V	24	sp|P01871|IGHM_HUMAN;sp|P0DOX6|IGM_HUMAN	154	177	no	7.6594e-49	182.19	4	-0.20465	B7;B9	0	0	0	0	0	0	0	0	0	0	0	0	0	0	0	0	96547000	0	0	--	--	--	--	--	--	--	--	--	0	--	96547000	--
374	SMGGKEDLIWELLNQAQEHFGK	SM(ox)GGKEDLIWELLNQAQEHFGK;SMGGKEDLIWELLN(de)QAQEHFGK;SM(ox)GGKEDLIWELLN(de)QAQEHFGK	1	2529.23	3;4	R	D	22	sp|P02787|TRFE_HUMAN	274	295	yes	8.5575e-49	220.62	35	-1.0237	A1;A4;A5;A6;A7;A9;B1;B2;B3;B4	1089300000	0	0	249770000	2020500000	745610000	186460000	0	186820000	21439000	0	2130200000	2059400000	864980000	0	0	0	0	0	50.8093	--	--	0.288758	--	--	--	--	--	746410000	0.9687	1269004750	0.7992
375	QFDHLNHLNPDKFESTDLDMLIK	(gl)QFDHLNHLNPDKFESTDLDMLIK;QFDHLN(de)HLNPDKFESTDLDMLIK	1	2769.34	3;4;5	K	A	23	sp|P80303|NUCB2_HUMAN	138	160	yes	1.6786e-48	215.48	29	-3.1357	A1;A3;A4;A5;A6;A7;A8;A9;B1;B10;B2;B3;B4;B7	136730000	0	153370000	658690000	46613000	425390000	258800000	403770000	408720000	158840000	219690000	36150000	154990000	77754000	0	0	748050000	0	0	0.860803	--	0.989548	8.47146	--	--	0.345966	--	--	311510375	0.642	232579000	1.121
376	GQPLSPEKYVTSAPMPEPQAPGR	GQPLSPEKYVTSAPM(ox)PEPQAPGR	1	2436.21	2;3;4	R	Y	23	sp|P01871|IGHM_HUMAN	369	391	yes	6.9759e-48	219.72	45	-1.6176	A10;A3;A6;A7;A8;A9;B10;B6;B7;B8;B9	0	746410000	565830000	0	0	279680000	1159300000	919320000	309720000	0	738630000	0	0	0	0	437290000	3241000000	297750000	375770000	--	1.01053	--	--	--	0.639576	0.357698	3.08756	0.824228	6.63377e+08	0.5223	1018088000	1.2315
377	RSYDVPPPPMEPDHPFYSNISK		1	2572.21	3;4	R	D	22	sp|P18669|PGAM1_HUMAN;sp|Q8N0Y7|PGAM4_HUMAN	117	138	yes	7.8592e-48	208.39	9	-2.0965	A3;A8;A9;B6	0	0	45189000	0	0	0	0	84063000	197440000	0	0	0	0	0	0	86735000	0	0	0	--	--	--	--	--	--	--	--	--	1.08897e+08	0.7264	86735000	--
378	GVVPLAGTDGETTTQGLDGLSER		0	2272.12	2	K	C	23	sp|P09972|ALDOC_HUMAN	112	134	yes	1.9232e-47	210.67	4	-1.2562	A10;A5;B4;B7	0	107860000	0	0	81966000	0	0	0	0	0	0	0	0	91636000	0	0	128500000	0	0	--	--	--	--	--	--	--	--	--	94913000	0.1929	110068000	0.2368
379	FLEQELETITIPDLR		0	1815.96	2;3	R	G	15	sp|P55058|PLTP_HUMAN	41	55	yes	5.8106e-44	220.23	6	-0.17217	A1;A5;A6;A7;A9;B4	0	0	0	0	0	354600000	189170000	0	26305000	0	0	0	0	0	0	0	0	0	0	--	--	--	--	--	--	--	--	--	190025000	0.8638	0	--
380	NHGVDDDGDDDGDDGGTDGPR	N(de)HGVDDDGDDDGDDGGTDGPR	0	2099.75	2;3	R	H	21	sp|Q14515|SPRL1_HUMAN	334	354	yes	9.3159e-44	209.85	57	-1.5315	A1;A10;A3;A4;A5;A6;A7;A8;A9;B1;B10;B2;B3;B4;B6;B7;B8	6513500	1137600	14260000	7515200	6484400	4239300	3686400	5466200	1747500	8787500	14106000	3060500	2875800	4255900	0	6341800	5834300	767010	0	0.741223	0.0806465	4.95862	1.76583	--	0.66847	0.63185	7.12663	--	5.67223e+06	0.6843	5.7536e+06	0.7255
381	AGYTDKVVIGMDVAASEFFR		1	2175.07	2;3	K	S	20	sp|P06733|ENOA_HUMAN	234	253	yes	1.0819e-43	199.37	7	-1.0032	A3;A9;B10;B5;B6;B7	0	0	75249000	0	0	0	0	0	107700000	0	52715000	0	0	0	1779100	401380000	72714000	0	0	--	--	--	--	--	--	--	--	--	91474500	0.2508	132147025	1.3769
382	LVGGPMDASVEEEGVR	LVGGPM(ox)DASVEEEGVR	0	1643.78	2;3	R	R	16	sp|P01034|CYTC_HUMAN	35	50	yes	1.2759e-43	177.83	153	-2.9368	A1;A10;A3;A4;A5;A6;A7;A8;A9;B1;B10;B2;B3;B4;B5;B6;B7;B8;B9	612910000	418760000	2168600000	501690000	228050000	1194400000	264760000	588880000	1831500000	1392200000	1189200000	122340000	200060000	516970000	3936000	703630000	1111800000	340940000	432840000	0.440246	0.352136	10.8397	0.970443	57.9395	1.69748	0.238136	1.72722	4.23136	8.67728e+08	0.8127	601391600	0.8018
383	KNADLQVLKPEPELVYEDLR	KN(de)ADLQVLKPEPELVYEDLR	2	2368.26	3;4	K	G	20	sp|P01833|PIGR_HUMAN	231	250	yes	1.6048e-43	218.07	97	-0.59549	A1;A10;A3;A4;A5;A6;A7;A8;A9;B1;B10;B2;B3;B4;B6;B7;B8;B9	572100000	261700000	2017100000	630680000	670830000	706890000	145360000	634140000	1131100000	468760000	642880000	688740000	611620000	812560000	0	368910000	605940000	149030000	198430000	1.22045	0.407074	3.29796	0.776164	--	1.91616	0.239892	4.25512	5.70025	7.52211e+08	0.7315	5.05208e+08	0.4478
384	ALHFVISEYNKATEDEYYR	ALHFVISEYN(de)KATEDEYYR	1	2347.11	2;3;4	R	R	19	sp|P09228|CYTT_HUMAN	47	65	yes	1.9691e-43	217.37	15	-3.0863	A1;A10;A4;A5;A9;B10;B6;B7;B8;B9	68373000	270650000	0	16778000	24114000	0	0	0	563010000	0	144090000	0	0	0	0	439110000	177220000	42685000	575270000	--	1.87834	--	--	--	--	--	--	0.978688	188585000	1.2378	275675000	0.8066
385	LISVDTEHSNIYLQNGPDR	LISVDTEHSNIYLQN(de)GPDR	0	2170.07	3	K	I	19	sp|P00450|CERU_HUMAN	44	62	yes	2.2082e-43	216.96	15	-1.106	A3;A5;A6;A7;A9;B3;B4;B6;B9	0	0	63514000	0	54381000	137100000	109270000	0	83572000	0	0	0	32638000	29272000	0	137940000	0	0	142860000	--	--	1.94601	--	--	0.99391	--	--	0.584992	89567400	0.3786	85677500	0.7381
386	HYYIGIIETTWDYASDHGEK		0	2397.09	3	K	K	20	sp|P00450|CERU_HUMAN	23	42	yes	2.4825e-43	160.43	2	-0.51826	A1;A4;A5	51439000	0	0	20687000	61094000	0	0	0	0	0	0	0	0	0	0	0	0	0	0	--	--	--	--	--	--	--	--	--	4.44067e+07	0.4752	0	--
387	YYHASLEPVDFVNAADESR	YYHASLEPVDFVN(de)AADESR	0	2182	3	K	K	19	sp|Q9UIV8|SPB13_HUMAN	127	145	yes	6.3154e-43	165.9	12	-0.41263	A10;A5;A8;A9;B3;B4;B6;B7;B8	0	74718000	0	0	87610000	0	0	116380000	184610000	0	0	0	42737000	119670000	0	153180000	82967000	22320000	0	--	--	--	--	--	--	--	5.21416	--	115829500	0.4235	84174800	0.6388
388	FSGWYDADLSPAGHEEAKR		1	2134.97	2;3;4	R	G	19	sp|P18669|PGAM1_HUMAN	22	40	yes	1.4051e-42	214.65	50	-2.7018	A1;A10;A3;A4;A5;A6;A7;A8;A9;B1;B10;B2;B3;B4;B5;B6;B8;B9	63067000	18288000	71768000	45396000	82224000	133570000	93980000	195550000	1309400000	19227000	59439000	54116000	71709000	29560000	734480	286100000	0	8386200	86945000	3.28013	0.307677	1.00082	1.53572	111.949	0.466865	--	23.3181	15.0601	2.23694e+08	1.8346	68468520	1.2663
389	DSGVPDRFSGSGSGTDFTLK		1	2028.94	2;3	R	I	20	sp|P06310|KV230_HUMAN	80	99	yes	1.4564e-42	254.59	52	-0.54591	A10;A3;A6;A7;A8;A9;B1;B10;B2;B3;B4;B6;B7;B8;B9	0	790640000	784240000	0	0	963470000	585250000	769510000	1652900000	11046000	900080000	13948000	42212000	19837000	0	1995200000	1520000000	166420000	226890000	--	0.878411	18.5786	--	--	0.482894	0.385033	4.6239	7.28503	924335000	0.4073	5.43959e+08	1.3818
390	FYQTSVESTDFANAPEESR		0	2176.95	2	K	K	19	sp|P48594|SPB4_HUMAN	126	144	yes	3.2177e-42	208.47	3	1.0169	A9;B6;B9	0	0	0	0	0	0	0	0	41120000	0	0	0	0	0	0	0	0	0	23105000	--	--	--	--	--	--	--	--	1.7797	41120000	--	23105000	--
391	VDTDGNGYISFNELNDLFK	VDTDGN(de)GYISFNELNDLFK	0	2160	2	K	A	19	sp|P13796|PLSL_HUMAN	21	39	yes	4.4419e-42	214.18	6	-1.0264	A1;A4;A5;B2;B3;B4	27491000	0	0	14254000	51479000	0	0	0	0	0	0	97448000	42858000	45020000	0	0	0	0	0	--	--	--	0.316615	--	--	--	--	--	3.10747e+07	0.6072	6.17753e+07	0.5004
392	ALVFVDNHDNQRGHGAGGASILTFWDAR	ALVFVDN(de)HDNQRGHGAGGASILTFWDAR	1	3023.47	3;4;5	R	L	28	sp|P04745|AMY1_HUMAN;sp|P19961|AMY2B_HUMAN;sp|P04746|AMYP_HUMAN;CON__Q3MHH8	307	334	no	9.7113e-42	190.6	26	-3.56	A10;A3;A6;A7;A8;A9;B10;B6;B7;B9	0	278870000	252520000	0	0	440330000	795170000	176550000	596560000	0	422950000	0	0	0	0	247820000	1009600000	0	141290000	--	0.659345	--	--	--	1.77681	0.787609	--	4.22224	4.23333e+08	0.5585	455415000	0.8504
393	SSVDELVGIDYSLMKDPVASTSNLDMDFR		1	3203.5	3	R	G	29	sp|P55058|PLTP_HUMAN	207	235	yes	1.1067e-41	188.41	1	-0.14453	B1;B2;B3	0	0	0	0	0	0	0	0	0	104560000	0	22054000	27832000	0	0	0	0	0	0	--	--	--	--	--	--	--	--	--	0	--	51482000	0.8946
394	IEEILDYLR		0	1162.62	2	K	R	9	sp|P23280|CAH6_HUMAN	296	304	yes	1.7632e-41	222.55	47	-0.90937	A1;A10;A3;A4;A5;A6;A7;A8;A9;B1;B10;B2;B3;B4;B5;B6;B7;B8;B9	5035600000	400730000	387180000	5230300000	2998300000	990740000	254210000	351580000	634630000	7816400000	186980000	2093000000	2616600000	2236800000	32339000	232580000	1762700000	53406000	117410000	0.644235	2.14317	0.147971	2.3383	92.7147	4.25978	0.144216	6.58316	5.40525	1.80925e+09	1.1416	1714821500	1.39
395	WSSWYNGHRPEPGLGGGDFETFENLRQR	WSSWYN(de)GHRPEPGLGGGDFETFENLRQR	2	3291.52	4;5	R	G	28	sp|Q9HC84|MUC5B_HUMAN	1340	1367	yes	2.1886e-41	184.26	3	-0.061541	A3;B6	0	0	82097000	0	0	0	0	0	0	0	0	0	0	0	0	416770000	0	0	0	--	--	--	--	--	--	--	--	--	82097000	--	416770000	--
396	YGKDATNVGDEGGFAPNILENKEGLELLK		2	3090.55	3;4	K	T	29	sp|P06733|ENOA_HUMAN	200	228	yes	3.009e-41	182.97	21	-0.94385	A10;A3;A6;A7;A8;A9;B10;B6;B7;B8;B9	0	600710000	107510000	0	0	115840000	301460000	704070000	582370000	0	339010000	0	0	0	0	1143800000	1311300000	125530000	1522300000	--	1.77195	--	--	--	0.101276	0.229894	5.60878	0.382559	4.01993e+08	0.6506	888388000	0.6961
397	AREDIFMETLKDIVEYYNDSNGSHVLQGR	AREDIFMETLKDIVEYYN(de)DSN(de)GSHVLQGR;AREDIFMETLKDIVEYYNDSN(de)GSHVLQGR	2	3398.62	4	K	F	29	sp|P25311|ZA2G_HUMAN	92	120	yes	3.7144e-41	179.81	11	-2.6289	A1;A3;A4;A5;A9;B1;B2;B3;B4;B6	18697000	0	55406000	76850000	73778000	0	0	0	69956000	19403000	0	173410000	111600000	89249000	0	183200000	0	0	0	0.963614	--	0.49647	0.861074	--	--	--	--	--	58937400	0.4064	115372400	0.5794
398	LADGGATNQGRVEIFYR	LADGGATN(de)QGRVEIFYR	1	1865.94	2;3	R	G	17	sp|Q08380|LG3BP_HUMAN	26	42	yes	7.6091e-41	180.62	16	-3.3482	A10;B10;B6;B7;B8;B9	0	68513000	0	0	0	0	0	0	0	0	61504000	0	0	0	0	80893000	436270000	209890000	121670000	--	1.11396	--	--	--	--	--	--	--	68513000	--	182045400	0.8412
399	SASDLTWDNLK	SASDLTWDN(de)LK	0	1248.6	1;2	K	G	11	sp|P02787|TRFE_HUMAN	454	464	yes	1.0358e-40	220.39	51	-0.57195	A1;A10;A3;A4;A5;A6;A7;A8;A9;B1;B10;B2;B3;B4;B5;B6;B7;B8;B9	439900000	309360000	499770000	205720000	407270000	1384700000	1509200000	353920000	1377400000	81728000	1005600000	696450000	903160000	330750000	7755100	2492100000	281470000	1148700000	1792300000	5.38249	0.307637	0.553357	0.62198	52.5164	0.555636	5.36185	0.308105	0.76851	7.20804e+08	0.7421	874001310	0.9034
400	APEPLELTLPVELLADTR		0	1976.08	2;3	R	V	18	sp|Q8N4F0|BPIB2_HUMAN	104	121	yes	1.1302e-40	270.79	45	-0.35669	A1;A10;A3;A4;A5;A6;A7;A8;A9;B1;B10;B2;B3;B4;B6;B7;B8;B9	112620000	74081000	1331800000	675980000	883280000	1166500000	384350000	48874000	674310000	907280000	251120000	1786700000	608990000	1099700000	0	354230000	281640000	29750000	29669000	0.124129	0.295002	2.1869	0.614695	--	3.29306	1.36469	1.64282	22.7278	5.94644e+08	0.8004	5.94342e+08	0.9749
401	ILTQDTPEFFIDQGHAK		0	1958.97	2;3	K	V	17	sp|Q8TDL5|BPIB1_HUMAN	340	356	yes	2.4645e-40	256.52	74	-0.58811	A1;A10;A3;A4;A5;A6;A7;A8;A9;B1;B10;B2;B3;B4;B5;B6;B7;B8;B9	515100000	254570000	532150000	756940000	355720000	24469000000	3421000000	326020000	1209500000	2479600000	687560000	893280000	1588100000	691630000	1660800	729920000	2693700000	114170000	504840000	0.207735	0.370251	0.335086	1.09443	214.186	33.5229	1.27	2.85557	2.39581	3.53778e+09	2.2362	1038446080	0.8903
402	GISQEQMQEFR		0	1351.62	2	K	A	11	sp|O43707|ACTN4_HUMAN	761	771	yes	2.4747e-40	218.48	23	-1.5367	A1;A10;A3;A4;A5;A6;A7;A8;A9;B1;B2;B3;B4;B5;B6;B7;B8;B9	26267000	25397000	54307000	13696000	31776000	92169000	92447000	19482000	263530000	4069700	0	9126600	33089000	25260000	1011900	213080000	65992000	6875400	47696000	6.45428	--	1.64124	0.542201	31.4023	0.432556	1.40088	2.83358	5.5252	6.87857e+07	1.1466	45133400	1.4776
403	ELDESLQVAER		0	1287.63	2	R	L	11	sp|P10909|CLUS_HUMAN	326	336	yes	2.4823e-40	218.47	33	-0.42407	A1;A3;A4;A5;A6;A7;A8;A9;B1;B10;B2;B3;B4;B5;B6;B7;B8;B9	66849000	0	583530000	35779000	209760000	1329800000	424080000	189350000	480410000	95043000	458930000	17020000	99232000	428200000	1405100	629280000	581370000	112150000	471220000	0.703355	--	5.88046	0.0835567	149.285	2.11321	0.729449	1.68836	1.0195	414944750	1.0093	289385010	0.8498
404	VLTHSELAPLR		0	1234.7	2;3	R	A	11	sp|Q14515|SPRL1_HUMAN	607	617	yes	2.7515e-40	243.03	80	-0.42253	A1;A10;A3;A4;A5;A6;A7;A8;A9;B1;B10;B2;B3;B4;B5;B6;B7;B8;B9	392290000	321750000	2674200000	1307100000	481230000	340560000	514830000	392240000	1032400000	875770000	1533400000	310560000	308010000	466530000	6177600	1005400000	1434000000	537220000	338510000	0.447937	0.209828	8.68219	2.80175	77.8992	0.338731	0.359017	0.730129	3.04984	8.28511e+08	0.9322	681557760	0.7501
405	LGVQDLFNSSK	LGVQDLFN(de)SSK	0	1206.62	2	R	A	11	sp|P30740|ILEU_HUMAN	291	301	yes	2.8044e-40	218.04	84	-0.58515	A1;A10;A3;A4;A5;A6;A7;A8;A9;B1;B10;B2;B3;B4;B5;B6;B7;B8;B9	194720000	637670000	347270000	174370000	403280000	290490000	627020000	763790000	835960000	55544000	257640000	377510000	480460000	337710000	7521100	1063200000	477940000	109510000	305030000	3.50569	2.47504	0.722786	0.516331	53.6198	0.273222	1.31192	6.97461	2.74058	4.74952e+08	0.5199	347206510	0.8668
406	LGQSDPAPLQHQMDIYQK	LGQSDPAPLQHQM(ox)DIYQK	0	2068	2;3	R	R	18	sp|P29401|TKT_HUMAN	187	204	yes	2.9594e-40	262.66	78	-0.7207	A1;A10;A3;A4;A5;A6;A7;A8;A9;B1;B10;B2;B3;B4;B5;B6;B7;B9	178910000	121080000	215780000	79226000	222550000	332660000	304980000	198640000	1746500000	43236000	219740000	184130000	230570000	141140000	1156200	792170000	144920000	0	101200000	4.13799	0.551015	0.935855	0.561329	192.484	0.419935	2.10447	--	17.2579	377814000	1.3746	2.06474e+08	1.1258
407	TEGDGVYTLNDKKQWINK	TEGDGVYTLN(de)DKKQWINK	2	2108.05	3;4	R	A	18	sp|P00738|HPT_HUMAN;sp|P00739|HPTR_HUMAN	60	77	no	3.7802e-40	209.57	23	-1.1376	A7;A8;B10;B6;B7;B8;B9	0	0	0	0	0	0	113270000	9127300	0	0	122020000	0	0	0	0	69666000	39085000	319920000	192390000	--	--	--	--	--	--	2.89804	0.0285299	--	61198650	1.2033	148616200	0.7538
408	WLHNEDQMAVEK	WLHN(de)EDQMAVEK;WLHNEDQM(ox)AVEK	0	1498.69	2;3	R	L	12	sp|P37837|TALDO_HUMAN	296	307	yes	4.2468e-40	221.6	108	-2.1701	A1;A10;A3;A4;A5;A6;A7;A8;A9;B1;B10;B2;B3;B4;B5;B6;B7;B8;B9	233290000	577680000	583270000	69093000	196950000	289070000	582010000	694750000	2179100000	20238000	457810000	219470000	239360000	162810000	2261300	2549800000	311160000	105820000	485950000	11.5273	1.26183	2.43679	0.424378	87.0959	0.11337	1.87045	6.56539	4.48421	6.00579e+08	1.0496	455467930	1.6549
409	ALHFVISEYNK	ALHFVISEYN(de)K	0	1319.69	2;3	R	A	11	sp|P09228|CYTT_HUMAN	47	57	yes	4.4229e-40	215.88	316	-1.5568	A1;A10;A3;A4;A5;A6;A7;A8;A9;B1;B10;B2;B3;B4;B5;B6;B7;B8;B9	6281100000	1098500000	3085700000	2264400000	4573200000	4357300000	883880000	2537300000	22216000000	4146700000	2075900000	814580000	2259100000	1255300000	39868000	7938800000	3788000000	540260000	6948000000	1.51472	0.529168	1.3659	1.80387	114.709	0.548861	0.233337	4.69644	3.19747	5.25526e+09	1.254	2980650800	0.9082
410	EAEAAIYHLQLFEELRR		1	2087.08	3;4	R	L	17	sp|P14618|KPYM_HUMAN	384	400	yes	4.9045e-40	209.13	15	-1.4435	A1;A3;A4;A5;A6;A7;A9;B10;B3;B4;B7;B9	63410000	0	50618000	21796000	50099000	145320000	132960000	0	217170000	0	93982000	0	216980000	60868000	0	0	185800000	0	219640000	--	--	0.233284	0.358086	--	--	0.715608	--	0.988754	97339000	0.7167	155454000	0.4722
411	QYTSFHFASLEDVQAK	(gl)QYTSFHFASLEDVQAK	0	1869.89	2;3	R	V	16	sp|P29508|SPB3_HUMAN	215	230	yes	6.6026e-40	220.85	27	-1.6513	A1;A10;A3;A4;A5;A6;A8;A9;B1;B2;B3;B4;B6;B7;B9	77169000	87096000	155950000	40798000	97820000	99946000	0	113950000	188560000	10436000	0	72688000	47824000	132410000	0	171290000	140950000	0	0	7.3945	--	3.26092	0.308119	--	0.58349	--	--	--	107661125	0.4285	95933000	0.646
412	DLELLIQTATR		0	1271.71	2	R	D	11	sp|Q02818|NUCB1_HUMAN	153	163	yes	7.6917e-40	211.52	10	-1.815	A3;A4;A5;A6;A7;A8;B1;B10;B4;B7;B9	0	0	22134000	28666000	0	22990000	23173000	43498000	0	38101000	49045000	0	0	13027000	0	0	68124000	0	0	--	--	--	2.20051	--	--	0.340159	--	--	28092200	0.3201	42074250	0.5466
413	VKDLATVYVDVLKDSGR		2	1877.03	3;4	R	D	17	sp|P02647|APOA1_HUMAN	35	51	yes	8.7047e-40	208.49	12	-1.4545	A6;A7;B10;B6;B8;B9	0	0	0	0	0	181810000	206690000	0	0	0	129550000	0	0	0	0	313440000	0	132750000	296880000	--	--	--	--	--	0.580047	--	--	--	194250000	0.0906	218155000	0.4616
414	DTANWLEINPDTGAISTR		0	1972.95	2	R	A	18	sp|P12830|CADH1_HUMAN	528	545	yes	1.1551e-39	210.14	3	1.2688	A4;A5;B3;B4	0	0	0	19520000	14675000	0	0	0	0	0	0	0	22269000	61389000	0	0	0	0	0	--	--	--	0.317972	--	--	--	--	--	17097500	0.2004	41829000	0.6613
415	RLNPQWDGEKLYQEAR		2	2002	3;4	K	K	16	sp|P22079|PERL_HUMAN	399	414	yes	1.5542e-39	220.25	29	-0.51936	A10;A3;A6;A7;A8;A9;B10;B6;B7;B8;B9	0	47298000	81275000	0	0	127750000	65717000	76023000	200040000	0	114170000	0	0	0	0	127940000	387850000	24877000	0	--	0.414277	--	--	--	0.998515	0.169439	3.05596	--	9.96838e+07	0.5613	163709250	0.9545
416	IIRQEPSDSPMFIINR		1	1915	2;3	K	N	16	sp|Q02413|DSG1_HUMAN	198	213	yes	1.7856e-39	195.72	9	-1.7549	A10;A3;A8;A9;B10;B6;B7;B9	0	89571000	109750000	0	0	0	0	205050000	147250000	0	67904000	0	0	0	0	162170000	428750000	0	75714000	--	1.31908	--	--	--	--	--	--	1.94482	137905250	0.368	183634500	0.9198
417	NSLYLQMNSLR	NSLYLQMN(de)SLR;N(de)SLYLQMN(de)SLR;NSLYLQM(ox)NSLR;NSLYLQM(ox)N(de)SLR	0	1337.68	2	K	A	11	sp|P01780|HV307_HUMAN;sp|P01766|HV313_HUMAN;sp|P01763|HV348_HUMAN;sp|P01762|HV311_HUMAN;sp|A0A0C4DH32|HV320_HUMAN;sp|A0A0B4J1V1|HV321_HUMAN;sp|P0DP04|HV43D_HUMAN;sp|P01782|HV309_HUMAN;sp|A0A0B4J1X8|HV343_HUMAN	96	106	yes	2.1858e-39	209.73	150	-2.6036	A1;A10;A3;A4;A5;A6;A7;A8;A9;B1;B10;B2;B3;B4;B5;B6;B7;B8	572520000	128850000	412000000	425010000	955810000	668020000	252400000	307560000	793010000	268710000	322040000	436690000	842780000	1063900000	6785200	333390000	309060000	70616000	0	2.13062	0.400106	0.488858	0.399483	140.867	2.00372	0.81667	4.35539	--	5.01687e+08	0.5351	405996800	0.8429
418	ALNAQGLDVEKPLILTVK	ALN(de)AQGLDVEKPLILTVK	1	1921.12	2;3	R	I	18	sp|P32926|DSG3_HUMAN	129	146	yes	2.2703e-39	210.14	46	-2.012	A1;A10;A3;A4;A5;A7;A8;A9;B1;B2;B3;B4;B6;B7;B8;B9	204540000	351540000	330880000	365770000	249430000	0	51289000	379940000	598540000	176960000	0	160480000	201120000	378200000	0	221730000	784790000	118180000	53290000	1.15585	--	1.64519	0.967134	--	--	0.0653538	3.21493	11.2318	316491125	0.4993	261843750	0.8827
419	LIYAASSLQSGVPSR		0	1547.83	2;3	R	F	15	sp|P01599|KV117_HUMAN	69	83	yes	3.4708e-39	221.32	22	-0.75145	A1;A10;A4;A5;A6;A7;A8;B1;B2;B3;B4;B5;B7	62066000	55639000	0	29451000	83717000	57904000	49810000	29432000	0	35558000	0	22766000	88426000	106420000	634720	0	42363000	0	0	1.74549	--	--	0.276743	131.896	--	1.17579	--	--	5.25741e+07	0.3622	4.93613e+07	0.8155
420	KWQEEMELYR	KWQEEM(ox)ELYR	1	1410.66	2;3	K	Q	10	sp|P02647|APOA1_HUMAN	131	140	yes	8.6487e-39	196.88	138	-2.9792	A1;A10;A3;A4;A5;A6;A7;A8;A9;B1;B10;B2;B3;B4;B6;B7;B8;B9	181010000	253190000	387970000	57637000	126310000	1271100000	1296600000	235550000	404990000	53353000	585420000	242600000	180240000	60963000	0	1656500000	162180000	412770000	1255100000	3.39269	0.432493	2.15252	0.945442	--	0.767341	7.99482	0.570657	0.322675	4.68262e+08	1.0157	5.12125e+08	1.1123
421	RIPIEDGSGEVVLSR		1	1625.87	2;3	K	K	15	sp|P01024|CO3_HUMAN	290	304	yes	1.1102e-38	217.68	94	-0.71156	A1;A10;A3;A4;A5;A6;A7;A8;A9;B1;B10;B2;B3;B4;B5;B6;B7;B8;B9	232400000	203920000	323160000	59344000	117660000	535300000	1108100000	357070000	619530000	20830000	564310000	133380000	238210000	217260000	4072000	1277600000	355320000	730700000	1297300000	11.157	0.361362	1.35662	0.273147	28.8949	0.418989	3.1186	0.488668	0.477553	3.95165e+08	0.8189	483898200	0.9922
422	KLFSDLGSSYAK		1	1314.68	2;3	R	Q	12	sp|Q96BQ1|FAM3D_HUMAN	160	171	yes	1.1231e-38	216.06	70	-3.936	A1;A10;A3;A4;A5;A6;A7;A8;A9;B1;B10;B2;B3;B4;B5;B6;B7;B8;B9	17415000	196910000	255710000	98851000	57143000	276140000	202520000	81296000	279290000	97661000	247380000	72774000	21522000	27172000	1008600	376880000	209010000	47485000	33321000	0.178321	0.795982	11.8813	3.63797	56.6558	0.7327	0.968949	1.71204	8.3818	1.62808e+08	0.6174	113421360	1.0905
423	ADFDDRVSDEEKVR	(ac)ADFDDRVSDEEKVR	2	1679.78	2;3	M	I	14	sp|P52907|CAZA1_HUMAN	2	15	yes	1.3024e-38	182.57	29	-0.73691	A1;A10;A3;A4;A5;A6;A7;A8;A9;B10;B6;B7;B8;B9	80059000	50014000	40980000	105640000	98764000	54733000	40227000	34501000	198440000	0	66152000	0	0	0	0	493430000	144410000	20283000	79326000	--	0.756047	--	--	--	0.110924	0.278561	1.70098	2.50158	7.81509e+07	0.6667	160720200	1.1897
424	TINEVENQILTR	TINEVEN(de)QILTR	0	1428.76	2	R	D	12	sp|O43707|ACTN4_HUMAN;sp|P12814|ACTN1_HUMAN	746	757	no	1.4201e-38	215.87	27	-0.98313	A1;A10;A3;A4;A5;A6;A7;A8;A9;B10;B2;B3;B4;B5;B6;B7;B9	46594000	81819000	95367000	18803000	38590000	171080000	229310000	93195000	707460000	0	95939000	19568000	56492000	23335000	1154500	638040000	91382000	0	117760000	--	0.852823	1.68815	0.805785	33.4257	0.268134	2.50936	--	6.00764	1.64691e+08	1.3	1.30459e+08	1.6039
425	FQDGDLTLYQSNTILR	FQDGDLTLYQSN(de)TILR	0	1882.94	2;3	K	H	16	sp|P09211|GSTP1_HUMAN	56	71	yes	1.4356e-38	266.78	39	-1.4778	A1;A10;A3;A4;A5;A6;A7;A8;A9;B1;B10;B2;B3;B4;B5;B6;B7;B8;B9	193660000	411740000	231660000	302430000	476110000	272450000	376960000	529710000	867110000	167750000	116120000	594410000	395590000	637300000	449430	766400000	452600000	78383000	296690000	1.15446	3.54581	0.585606	0.474549	1059.36	0.355493	0.832877	6.75797	2.92261	406870000	0.505	350569243	0.7457
426	AHSSMVGVNLPQK	AHSSM(ox)VGVNLPQK	0	1366.7	2;3	R	A	13	sp|P00558|PGK1_HUMAN	172	184	yes	1.4883e-38	219.72	39	-1.5147	A1;A10;A3;A4;A5;A8;A9;B10;B3;B4;B6;B7;B8;B9	16032000	28841000	58007000	44640000	25399000	0	0	129920000	278260000	0	79574000	0	36929000	36770000	0	439320000	207290000	13703000	74753000	--	0.362443	1.57077	1.21403	--	--	--	9.48114	3.72239	8.30141e+07	1.1339	1.26906e+08	1.1953
427	ELQQAVLHMEQR	ELQQAVLHM(ox)EQR	0	1480.75	2;3	R	K	12	sp|Q02818|NUCB1_HUMAN	388	399	yes	1.6759e-38	232	26	-4.2856	A1;A10;A3;A4;A5;A6;A7;A9;B1;B10;B7;B8;B9	35005000	77440000	137530000	43771000	0	90750000	46262000	0	107030000	38888000	246880000	0	0	0	0	0	616250000	75654000	71502000	0.900149	0.313675	--	--	--	--	0.0750702	--	1.49688	7.68269e+07	0.4919	209834800	1.15
428	LTEPADTITDAVK		0	1372.71	1;2;3	R	V	13	sp|P06870|KLK1_HUMAN	126	138	yes	1.8802e-38	220.94	273	-1.3914	A1;A10;A3;A4;A5;A6;A7;A8;A9;B1;B10;B2;B3;B4;B5;B6;B7;B8;B9	526770000	4077600000	5518600000	3162000000	1388400000	3053800000	2282900000	5539500000	28684000000	1743000000	5657200000	938900000	1532100000	712840000	17099000	10762000000	3091400000	765670000	1481800000	0.30222	0.720781	3.60198	4.43578	81.1977	0.283758	0.738468	7.23484	19.3575	6.02595e+09	1.4377	2670200900	1.2208
429	TSIVHLFEWR		0	1286.68	1;2;3	R	W	10	sp|P04745|AMY1_HUMAN;sp|P19961|AMY2B_HUMAN;sp|P04746|AMYP_HUMAN;CON__Q3MHH8	26	35	no	2.0175e-38	218.55	278	-0.74335	A1;A10;A3;A4;A5;A6;A7;A8;A9;B1;B10;B2;B3;B4;B5;B6;B7;B8;B9	21026000000	10474000000	6643700000	25295000000	16571000000	10993000000	11089000000	13247000000	16889000000	23169000000	4617100000	21444000000	3750600000	24769000000	561200000	3627200000	10187000000	337260000	3700600000	0.907506	2.26852	1.77137	1.02124	29.5278	3.03071	1.08854	39.2783	4.56385	1.4692e+10	0.397	9616296000	1.0117
430	LQLEAVNITDLSENR		0	1713.89	2;3	R	K	15	sp|P18510|IL1RA_HUMAN	103	117	yes	2.0932e-38	278.95	48	-1.1852	A1;A10;A3;A4;A5;A6;A7;A8;A9;B1;B10;B2;B3;B4;B5;B6;B7;B8;B9	91023000	298640000	230720000	123470000	257040000	255560000	252710000	557220000	399170000	48936000	74968000	339520000	170950000	351020000	108710	476740000	484670000	55359000	206800000	1.86004	3.98357	1.34963	0.351746	2364.46	0.536057	0.521406	10.0656	1.93022	2.7395e+08	0.5091	220907171	0.8206
431	EAVANKGPVSVGVDAR		1	1567.83	2	K	H	16	sp|P25774|CATS_HUMAN	240	255	yes	2.1007e-38	218.5	2	0.23166	A10;A9;B7	0	3580700	0	0	0	0	0	0	26398000	0	0	0	0	0	0	0	18565000	0	0	--	--	--	--	--	--	--	--	--	14989350	1.0764	18565000	--
432	SQAEFEKAAEEVR	(ac)SQAEFEKAAEEVR	1	1492.72	2	M	H	13	sp|P07108|ACBP_HUMAN	2	14	yes	2.1551e-38	208.72	4	-2.8858	A10;A7;A8;B10;B7;B8;B9	0	257770000	0	0	0	0	239220000	377180000	0	0	216830000	0	0	0	0	0	411750000	160910000	194260000	--	1.18881	--	--	--	--	0.580984	2.34404	--	291390000	0.257	245937500	0.4591
433	HLVQQEGQLEQQER		0	1720.85	3	K	Q	14	sp|P07476|INVO_HUMAN	405	418	yes	2.1909e-38	171.95	7	-0.65508	A10;A7;A8;B7;B9	0	11327000	0	0	0	0	6388000	5526800	0	0	0	0	0	0	0	0	19534000	0	15502000	--	--	--	--	--	--	0.32702	--	--	7.74727e+06	0.404	17518000	0.1628
434	NEDSLVFVQTDK	N(de)EDSLVFVQTDK	0	1393.67	2	K	S	12	sp|P01023|A2MG_HUMAN	124	135	yes	2.2862e-38	212.28	70	-0.84885	A1;A10;A3;A4;A5;A6;A7;A8;A9;B1;B10;B2;B3;B4;B5;B6;B7;B8;B9	237730000	196710000	306890000	63495000	193330000	628010000	622780000	180420000	471190000	26272000	422490000	238300000	227880000	199450000	3552200	450950000	61642000	198290000	430380000	9.0488	0.465597	1.34672	0.31835	54.4254	1.39264	10.1032	0.909879	1.09482	3.22284e+08	0.6329	225920620	0.7362
435	LLIYDASNLETGVPSR	LLIYDASN(de)LETGVPSR	0	1746.92	2;3	K	F	16	sp|P01594|KV133_HUMAN;sp|P01593|KVD33_HUMAN	68	83	yes	2.3607e-38	259.23	48	-1.0629	A1;A10;A4;A5;A6;A7;A8;A9;B1;B10;B2;B3;B4;B6;B7;B8;B9	351100000	161620000	0	122120000	200380000	274800000	292270000	513930000	542940000	72738000	414620000	172630000	237980000	287070000	0	356190000	225990000	195320000	146940000	4.82691	0.389803	--	0.425401	--	0.771498	1.29329	2.63122	3.69498	307395000	0.5045	2.34386e+08	0.4508
436	SSEDPNEDIVER	SSEDPN(de)EDIVER	0	1388.61	1;2;3	R	N	12	sp|P01591|IGJ_HUMAN	47	58	yes	2.4062e-38	211.78	393	-0.72405	A1;A10;A3;A4;A5;A6;A7;A8;A9;B1;B10;B2;B3;B4;B5;B6;B7;B8;B9	4110600000	8351600000	19533000000	3141000000	3512100000	15821000000	12709000000	8951700000	23197000000	2158400000	17543000000	1655200000	2858200000	7280100000	36900000	23793000000	17429000000	5589700000	5182800000	1.90447	0.476065	6.83402	0.43145	95.1789	0.664943	0.729187	1.60146	4.47577	1.10363e+10	0.6598	8352630000	0.9829
437	ELEGALSTMVQLYSR		0	1695.85	2	K	T	15	sp|Q6UWW0|LCN15_HUMAN	127	141	yes	2.4442e-38	218.54	1	-0.67021	B3	0	0	0	0	0	0	0	0	0	0	0	0	43342000	0	0	0	0	0	0	--	--	--	--	--	--	--	--	--	0	--	43342000	--
438	VFEGNRPTNSIVFTK	VFEGNRPTN(de)SIVFTK	1	1707.89	2;3	K	L	15	sp|P06744|G6PI_HUMAN;CON__Q3ZBD7	467	481	yes	2.5096e-38	220.53	53	-2.2357	A1;A10;A3;A4;A5;A7;A8;A9;B1;B2;B3;B4;B5;B6;B7	243990000	11870000	149630000	125460000	295640000	0	44934000	32393000	815490000	26661000	0	357250000	318130000	254330000	3883300	109320000	24392000	0	0	9.15157	--	0.470342	0.493296	76.1311	--	1.84216	--	--	214925875	1.2231	156280900	0.9627
439	NPDDITQEEYGEFYK		0	1846.79	2	R	S	15	sp|P08238|HS90B_HUMAN	292	306	yes	2.8461e-38	218.01	1	0.39253	A5	0	0	0	0	10957000	0	0	0	0	0	0	0	0	0	0	0	0	0	0	--	--	--	--	--	--	--	--	--	10957000	--	0	--
440	LRTEGDGVYTLNNEK	LRTEGDGVYTLN(de)NEK	1	1707.84	2;3	K	Q	15	sp|P00738|HPT_HUMAN	117	131	yes	2.9285e-38	220.32	71	-2.1895	A1;A3;A4;A5;A6;A7;A8;A9;B10;B3;B4;B5;B6;B7;B8;B9	304350000	0	109690000	16787000	128780000	449770000	611630000	116830000	373680000	0	499070000	0	196740000	242550000	794700	598420000	96507000	203760000	115090000	--	--	0.557538	0.0692105	162.049	0.751596	6.33767	0.573371	3.24685	263939625	0.7763	2.44116e+08	0.8367
441	VANPSGNLTETYVQDR		0	1762.85	2	R	G	16	sp|P21333|FLNA_HUMAN	1297	1312	yes	2.9957e-38	212.59	8	-0.29695	A1;A10;A6;A7;B2;B6	0	19067000	0	0	0	35467000	30385000	0	0	0	0	8818700	0	0	0	113450000	0	0	0	--	--	--	--	--	0.312622	--	--	--	2.83063e+07	0.2966	61134350	1.2102
442	IPIEDGSGEVVLSR		0	1469.77	2	R	K	14	sp|P01024|CO3_HUMAN	291	304	yes	3.1896e-38	217.83	73	-0.46386	A1;A10;A3;A4;A5;A6;A7;A8;A9;B1;B10;B2;B3;B4;B5;B6;B7;B8;B9	178730000	158190000	147440000	38023000	109520000	338860000	776950000	245870000	354000000	17954000	379500000	75312000	124330000	95438000	3057500	685280000	221310000	332860000	642960000	9.95488	0.416838	1.18588	0.398405	35.8201	0.494484	3.51069	0.738659	0.550579	2.60843e+08	0.84	257800150	0.9613
443	NSYVAGQYDDAASYQR	N(de)SYVAGQYDDAASYQR	0	1806.78	2	R	L	16	sp|P11413|G6PD_HUMAN	105	120	yes	3.3266e-38	266.97	25	-0.45837	A1;A10;A3;A5;A6;A7;A8;A9;B10;B2;B4;B6;B7;B9	21699000	14968000	25407000	0	9476400	39232000	78933000	32133000	259120000	0	42321000	0	0	0	0	157900000	56424000	0	22764000	--	0.353678	--	--	--	0.248461	1.39893	--	11.3829	60121050	1.3839	69852250	0.8632
444	DPAFTALLTTQTQVQR		0	1788.94	2;3	K	E	16	sp|P54108|CRIS3_HUMAN	25	40	yes	3.7173e-38	263.57	16	-0.94769	A1;A10;A3;A4;A5;A8;B1;B10;B2;B3;B4;B7	66314000	63915000	48020000	108520000	12034000	0	0	57659000	0	58527000	51397000	254870000	90387000	238370000	0	0	120030000	0	0	1.13305	1.24356	0.531271	0.455259	--	--	--	--	--	5.94103e+07	0.5246	1.35597e+08	0.6605
445	EQLGPVTQEFWDNLEK		0	1931.93	2	R	E	16	sp|P02647|APOA1_HUMAN;CON__P15497	86	101	yes	4.2237e-38	208.82	6	0.27129	A1;A4;A5;B1;B2;B3;B4;B6	49880000	0	0	37491000	59594000	0	0	0	0	19689000	0	137080000	54113000	22882000	0	53528000	0	0	0	2.53339	--	--	1.63845	--	--	--	--	--	4.89883e+07	0.2261	57458400	0.825
446	VLGAFSDGLAHLDNLK	VLGAFSDGLAHLDN(de)LK	0	1668.88	2;3	K	G	16	sp|P02042|HBD_HUMAN;sp|P68871|HBB_HUMAN	68	83	no	4.2315e-38	208.79	31	-0.78536	A1;A3;A4;A5;A6;A7;B1;B10;B3;B4;B5;B6;B7;B8;B9	487180000	0	174330000	41293000	570890000	589650000	816510000	0	0	32731000	548170000	0	598760000	76157000	623830	184550000	43792000	621880000	1381700000	14.8844	--	0.291152	0.542209	915.137	3.19507	18.6452	--	--	4.46642e+08	0.6433	3.87596e+08	1.1701
447	MTQSPSSFSASTGDR		0	1557.67	2	R	V	15	sp|A0A0C4DH67|KV108_HUMAN	24	38	yes	4.2561e-38	259.55	14	-0.31195	A1;A3;A5;A6;A7;A9;B3;B4	11245000	0	19690000	0	14886000	44575000	21673000	0	45548000	0	0	0	0	6678400	0	0	0	0	0	--	--	--	--	--	--	--	--	--	26269500	0.5714	6678400	--
448	VSGWGTTTSPQVNYPK		0	1720.84	2	R	T	16	sp|Q9UKR3|KLK13_HUMAN	159	174	yes	4.3831e-38	208.33	38	-0.60012	A10;A3;A4;A5;A6;A7;A8;A9;B1;B10;B2;B3;B4;B6;B7;B8;B9	0	28716000	78508000	44991000	27722000	53308000	55933000	40799000	161870000	11328000	131790000	16587000	46256000	43529000	0	164080000	109380000	11454000	38286000	--	0.217892	1.69725	1.03359	--	0.32489	0.511364	3.56199	4.22792	61480875	0.7111	6.36322e+07	0.8933
449	VNVDEVGGEALGR		0	1313.66	2;3	K	L	13	sp|P68871|HBB_HUMAN	19	31	yes	4.535e-38	215.5	69	-0.46717	A1;A10;A3;A4;A5;A6;A7;A8;A9;B1;B10;B3;B4;B5;B6;B7;B8;B9	485600000	0	595110000	0	657830000	1318300000	4408000000	108020000	701830000	39749000	2603500000	0	797460000	171440000	16809000	2066700000	169670000	2493900000	4485900000	12.2167	--	0.746257	--	39.1356	0.637877	25.9798	0.0433137	0.156452	1.1821e+09	1.2411	1.42724e+09	1.101
450	GQNRPGVQTQGQATGSAWVSSYDR		1	2549.2	3	R	Q	24	sp|Q9UBG3|CRNN_HUMAN	146	169	yes	4.5702e-38	197.37	25	-0.44947	A10;A6;A7;A8;A9;B4;B6;B7;B8;B9	0	30775000	0	0	0	57860000	38382000	52737000	105850000	0	0	0	0	30729000	0	70423000	165370000	28919000	42506000	--	--	--	--	--	0.821607	0.232098	1.82361	2.49024	57120800	0.5134	67589400	0.8452
451	TQEQLALEMAELTAR		0	1702.86	2	K	I	15	sp|P26038|MOES_HUMAN	413	427	yes	4.7247e-38	215.53	3	-0.26701	A1;A4;A5;B3	38072000	0	0	6748300	44446000	0	0	0	0	0	0	0	41915000	0	0	0	0	0	0	--	--	--	--	--	--	--	--	--	2.97554e+07	0.6781	41915000	--
452	AVTLSLDGGDTAIR		0	1387.73	2;3	K	V	14	sp|Q9HC84|MUC5B_HUMAN	480	493	yes	4.7664e-38	215.87	141	-1.2515	A1;A10;A3;A4;A5;A6;A7;A8;A9;B1;B10;B2;B3;B4;B5;B6;B7;B8;B9	772480000	422860000	6220800000	1459500000	1652300000	4312000000	2848700000	791140000	4389900000	1565400000	1920400000	1757600000	1303500000	2025900000	18097000	3745100000	1195900000	375730000	543000000	0.493471	0.220194	4.77238	0.720421	91.3024	1.15137	2.38206	2.10561	8.08453	2.54108e+09	0.7972	1445062700	0.7309
453	FEELNADLFR		0	1252.61	2	R	G	10	sp|P11142|HSP7C_HUMAN;sp|P54652|HSP72_HUMAN	302	311	yes	4.7838e-38	214.12	13	-0.23814	A1;A4;A5;A6;A7;A8;A9;B1;B2;B3;B4;B5	39936000	0	0	36526000	78729000	42424000	26322000	50359000	43473000	17077000	0	58847000	66444000	57320000	767350	0	0	0	0	2.33858	--	--	0.63723	102.599	--	--	--	--	4.53956e+07	0.362	40091070	0.7293
454	IEEILDYLRR		1	1318.72	2;3	K	A	10	sp|P23280|CAH6_HUMAN	296	305	yes	5.0935e-38	230.7	59	-0.60976	A1;A10;A3;A4;A5;A6;A7;A8;A9;B1;B10;B2;B3;B4;B5;B6;B7;B8;B9	320370000	419770000	514060000	328580000	165200000	1219200000	1110500000	494700000	1293000000	494990000	793950000	107400000	256370000	155380000	1060900	496000000	3456900000	734400000	1124900000	0.647225	0.528711	2.00515	2.11469	155.717	2.45806	0.321242	0.673611	1.14944	6.51709e+08	0.6627	762135090	1.3244
455	VLDSGFREIENK	VLDSGFREIEN(de)K	1	1405.72	2;3	K	A	12	sp|P01833|PIGR_HUMAN	586	597	yes	5.5865e-38	209.97	85	-2.2645	A10;A3;A6;A7;A8;A9;B10;B6;B7;B8;B9	0	1689200000	3012900000	0	0	3427400000	1009600000	264140000	346160000	0	3840000000	0	0	0	0	228220000	2671800000	4799200000	1818600000	--	0.439896	--	--	--	15.018	0.377873	0.0550383	0.190344	1624900000	0.8277	2671564000	0.6641
456	VVSTNYNQHAMVFFK	VVSTNYNQHAM(ox)VFFK;VVSTN(de)YNQHAMVFFK;VVSTN(de)YN(de)QHAMVFFK	0	1783.87	2;3	R	K	15	sp|P80188|NGAL_HUMAN	130	144	yes	6.0003e-38	213.84	54	-2.642	A1;A3;A4;A5;A6;A9;B1;B2;B3;B4;B5	454440000	0	61513000	244190000	447590000	250150000	0	0	242250000	126300000	0	602330000	863010000	629380000	1269900	0	0	0	0	3.5981	--	0.0712773	0.387985	352.461	--	--	--	--	283355500	0.5229	444457980	0.8205
457	GHFDTLSKGELK		1	1330.69	2;3	K	Q	12	sp|P80511|S10AC_HUMAN	23	34	yes	6.1172e-38	208.84	4	-0.2964	A8;B7	0	0	0	0	0	0	0	150070000	0	0	0	0	0	0	0	0	47504000	0	0	--	--	--	--	--	--	--	--	--	150070000	--	47504000	--
458	DNENVVNEYSSELEK		0	1767.78	2	K	H	15	sp|P02675|FIBB_HUMAN	164	178	yes	6.5963e-38	213.06	11	-0.20909	A1;A4;A5;B2;B3;B4	33617000	0	0	13558000	37401000	0	0	0	0	0	0	21887000	21871000	15827000	0	0	0	0	0	--	--	--	0.856637	--	--	--	--	--	28192000	0.4545	1.98617e+07	0.1759
459	ALKDEEKMELQEIQLK		2	1944.02	2;4	R	E	16	sp|P06753|TPM3_HUMAN	135	150	yes	7.5276e-38	209.41	17	-1.5362	A10;A3;A5;A6;A7;A8;A9;B10;B3;B6;B7;B9	0	31595000	67557000	0	13863000	74799000	61436000	103080000	174380000	0	68299000	0	17914000	0	0	145380000	88036000	0	70637000	--	0.462598	3.77118	--	--	0.514507	0.697851	--	2.46868	7.52443e+07	0.6975	78053200	0.5871
460	RHVFGESDELIGQK		1	1613.82	2;3;4	R	V	14	sp|P60174|TPIS_HUMAN	137	150	yes	7.5427e-38	232.42	87	-1.8439	A1;A10;A3;A4;A5;A6;A7;A8;A9;B1;B10;B2;B3;B4;B6;B7;B8;B9	110590000	205240000	190890000	106400000	168350000	129680000	239180000	214260000	927960000	22252000	151980000	117580000	166830000	171050000	0	1298000000	101940000	58938000	106680000	4.96989	1.35044	1.14422	0.62204	--	0.0999076	2.34628	3.63535	8.69854	2.54728e+08	1.0081	2.43917e+08	1.6329
461	GDQLILNLNNISSDR	GDQLILNLN(de)NISSDR	0	1670.86	2	K	I	15	sp|Q8TDL5|BPIB1_HUMAN	392	406	yes	7.5685e-38	211.77	23	-3.4172	A1;A4;A5;A6;B1;B2;B3;B4	40681000	0	0	72943000	26173000	1021300000	0	0	0	259830000	0	82957000	172590000	110420000	0	0	0	0	0	0.156568	--	--	0.660596	--	--	--	--	--	290274250	1.6803	156449250	0.5015
462	LNPQWDGEKLYQEAR		1	1845.9	2;3	R	K	15	sp|P22079|PERL_HUMAN	400	414	yes	8.004e-38	225.1	29	-0.48404	A1;A10;A3;A4;A5;A6;A7;A8;A9;B10;B3;B4;B6;B7;B8;B9	19465000	103440000	1019400000	25810000	24821000	83773000	119460000	152630000	1295800000	0	183970000	0	65871000	55150000	0	190510000	435730000	56051000	53973000	--	0.562266	15.4757	0.467996	--	0.43973	0.274161	2.72306	24.0083	3.16067e+08	1.5322	1.48751e+08	0.945
463	FNWYVDGVEVHNAK	FNWYVDGVEVHN(de)AK;FN(de)WYVDGVEVHN(de)AK	0	1676.79	2;3	K	T	14	sp|P0DOX5|IGG1_HUMAN;sp|P01857|IGHG1_HUMAN	277	290	yes	8.0251e-38	211.84	316	-2.4352	A1;A10;A3;A4;A5;A6;A7;A8;A9;B1;B10;B2;B3;B4;B5;B6;B7;B8;B9	6462000000	1233300000	3416800000	2036500000	4086600000	10263000000	13448000000	3435600000	12066000000	817390000	10795000000	1518400000	5185500000	5084900000	10487000	7680300000	2948900000	3199000000	4611200000	7.90565	0.114247	0.658914	0.4005	389.682	1.33628	4.56034	1.07396	2.61667	6.27198e+09	0.7248	4185107700	0.7815
464	QKVEPLRAELQEGAR	(gl)QKVEPLRAELQEGAR	2	1722.94	2;3;4	R	Q	15	sp|P02647|APOA1_HUMAN	141	155	yes	8.1167e-38	216.03	147	-1.5531	A1;A10;A3;A6;A7;A8;A9;B10;B2;B3;B6;B7;B8;B9	38459000	790700000	764850000	0	0	4366500000	5321200000	635370000	1115300000	0	1847700000	43695000	58844000	0	0	3699100000	426800000	2178500000	5651900000	--	0.427937	12.9979	--	--	1.18042	12.4677	0.291655	0.197332	1.86177e+09	1.1176	1.98665e+09	1.0548
465	TGTHGLLVKQEDMK	TGTHGLLVKQEDM(ox)K	1	1555.8	2;3;4	R	G	14	sp|P01023|A2MG_HUMAN	508	521	yes	8.3057e-38	243.4	16	-0.41216	A10;B8;B9	0	83880000	0	0	0	0	0	0	0	0	0	0	0	0	0	0	0	429520000	45661000	--	--	--	--	--	--	--	--	--	83880000	--	237590500	1.1424
466	LLDNWDSVTSTFSK		0	1611.78	2	K	L	14	sp|P02647|APOA1_HUMAN	70	83	yes	8.3296e-38	211.46	28	-2.137	A1;A10;A4;A5;A6;A7;A8;A9;B1;B10;B2;B3;B4;B6;B7;B8;B9	409040000	311310000	0	173290000	347110000	612820000	944530000	252050000	39207000	89964000	278970000	1022300000	635710000	135860000	0	178480000	115270000	238860000	801150000	4.54671	1.11593	--	1.2755	--	3.43355	8.19407	1.05522	0.0489384	386169625	0.7288	3.88507e+08	0.8819
467	EYTDASFTNR		0	1202.52	2	R	K	10	sp|P00450|CERU_HUMAN	427	436	yes	8.382e-38	208.37	31	-0.72845	A1;A10;A3;A4;A5;A6;A7;A8;A9;B10;B2;B3;B4;B5;B6;B7;B8;B9	42016000	16010000	92561000	17832000	39786000	257680000	137690000	34287000	125870000	0	171530000	37409000	23032000	41329000	1374800	129030000	48306000	76462000	102320000	--	0.0933364	4.0188	0.431465	28.9395	1.99705	2.85037	0.448419	1.23016	8.48591e+07	0.9322	7.00881e+07	0.7839
468	YSMVELQDPNSNR	YSMVELQDPN(de)SNR	0	1551.7	2	K	I	13	sp|A8K2U0|A2ML1_HUMAN	155	167	yes	8.5334e-38	209.97	18	-3.7174	A1;A3;A4;A5;A9;B1;B2;B3;B4;B5;B6	0	0	35887000	38098000	46524000	0	0	0	100510000	12246000	0	17729000	34654000	64200000	607640	58623000	0	0	0	--	--	1.03558	0.593427	76.5651	--	--	--	--	55254750	0.5523	3.13433e+07	0.8233
469	QAALQVAEGFISR	(gl)QAALQVAEGFISR	0	1388.74	2;3	R	M	13	sp|P40121|CAPG_HUMAN	307	319	yes	9.3481e-38	208.84	37	-0.49832	A1;A10;A3;A4;A5;A6;A7;A8;A9;B10;B2;B3;B4;B6;B7;B8;B9	37922000	270220000	96117000	37256000	66205000	183050000	202050000	232920000	311710000	0	156340000	121170000	92698000	74659000	0	374240000	163330000	38498000	122970000	--	1.72841	1.03688	0.499016	--	0.489125	1.23707	6.05018	2.53485	1.59717e+08	0.6478	142988125	0.7145
470	IAQLEEQLDNETKER		1	1814.9	2;3	K	Q	15	sp|P35579|MYH9_HUMAN	1816	1830	yes	1.0354e-37	214.81	6	-0.78781	A7;A8;B6;B9	0	0	0	0	0	0	165310000	27107000	0	0	0	0	0	0	0	200590000	0	0	46410000	--	--	--	--	--	--	--	--	--	96208500	1.0158	123500000	0.8828
471	SLTLTIHTSYVGSR		0	1533.82	2	R	S	14	sp|A8K2U0|A2ML1_HUMAN	1346	1359	yes	1.0999e-37	183	1	NAN	B3	0	0	0	0	0	0	0	0	0	0	0	0	0	0	0	0	0	0	0	--	--	--	--	--	--	--	--	--	0	--	0	--
472	DFPAVPYSGWDFNDGK	DFPAVPYSGWDFN(de)DGK	0	1813.79	1;2;3	R	C	16	sp|P04745|AMY1_HUMAN;sp|P19961|AMY2B_HUMAN;sp|P04746|AMYP_HUMAN	140	155	no	1.2687e-37	262.11	400	-3.547	A1;A10;A3;A4;A5;A6;A7;A8;A9;B1;B10;B2;B3;B4;B5;B6;B7;B8;B9	13262000000	15489000000	2502200000	20559000000	12483000000	4685900000	7541300000	10593000000	3701500000	17740000000	3170700000	15981000000	3666200000	16734000000	20347000	1611900000	11308000000	413750000	2379900000	0.747576	4.88504	0.682505	1.22858	613.506	2.90707	0.6669	25.6024	1.55532	1.00908e+10	0.5955	7302579700	0.9966
473	VNKDDEEFIESNK		1	1565.72	2;3	K	M	13	sp|P00450|CERU_HUMAN	945	957	yes	1.5375e-37	210.95	12	-0.94438	A1;A3;A4;A5;A6;A7;B1;B2;B3;B4;B5	49910000	0	20303000	33228000	74019000	14159000	28909000	0	0	13417000	0	68424000	56620000	69861000	1987100	0	0	0	0	3.71991	--	0.358584	0.47563	37.2498	--	--	--	--	3.67547e+07	0.5982	42061820	0.7617
474	DGDRFWWENPGVFTNEQKDSLQK		2	2795.29	3;4	R	M	23	sp|P22079|PERL_HUMAN	641	663	yes	1.5606e-37	161.66	11	-0.49764	A10;A3;A6;A7;A8;B10;B6;B7;B9	0	99814000	123090000	0	0	81350000	188390000	161990000	0	0	286530000	0	0	0	0	182980000	1142500000	0	73695000	--	0.348354	--	--	--	0.444584	0.164893	--	--	130926800	0.3363	421426250	1.1592
475	LLAVAATAPPDAPNREEVFDER		1	2380.2	3	K	A	22	sp|P18206|VINC_HUMAN	608	629	yes	1.5642e-37	160.13	17	-1.3572	A1;A10;A4;A5;A8;B1;B2;B3;B4;B7	42994000	122580000	0	20560000	56164000	0	0	133110000	0	0	0	54139000	77542000	27421000	0	0	93194000	0	0	--	--	--	0.74979	--	--	--	--	--	75081600	0.6654	63074000	0.4547
476	SDDKVTLEERLDK		2	1546.78	2;3;4	K	A	13	sp|P01024|CO3_HUMAN	1523	1535	yes	1.6716e-37	219.43	39	-0.97172	A10;A3;A6;A7;A8;A9;B10;B6;B7;B8;B9	0	76033000	106010000	0	0	172440000	962030000	133550000	21221000	0	310860000	0	0	0	0	1253500000	301920000	422490000	797320000	--	0.244589	--	--	--	0.137567	3.18637	0.316102	0.0266154	245214000	1.4473	617218000	0.6623
477	SKEQLTPLIK		1	1155.69	2	K	K	10	sp|P02652|APOA2_HUMAN	68	77	yes	1.7137e-37	207.83	6	0.41793	B8;B9	0	0	0	0	0	0	0	0	0	0	0	0	0	0	0	0	0	129560000	131330000	--	--	--	--	--	--	--	--	--	0	--	130445000	0.0096
478	VSGVGNNISFEEK	VSGVGN(de)NISFEEK	0	1378.67	2	R	K	13	sp|A8K2U0|A2ML1_HUMAN	98	110	yes	1.7326e-37	211.86	63	-2.8552	A1;A10;A3;A4;A5;A6;A7;A8;A9;B1;B10;B2;B3;B4;B5;B6;B7;B8;B9	76341000	182680000	306010000	121360000	101970000	197800000	76368000	303860000	1255000000	33054000	0	70314000	94337000	244760000	9741900	1597200000	612220000	7612500	15301000	2.30958	--	3.2438	0.495833	10.4672	0.123842	0.124739	39.9159	82.0208	2.91265e+08	1.277	2.98282e+08	1.7582
479	VTISVDTSKNQFSLK	VTISVDTSKN(de)QFSLK	1	1665.89	2;3	R	L	15	sp|P06331|HV434_HUMAN;sp|P01825|HV459_HUMAN;sp|P0DP08|HVD82_HUMAN;sp|P0DP06|HVD34_HUMAN;sp|A0A0C4DH41|HV461_HUMAN;sp|P01824|HV439_HUMAN	93	107	yes	1.9379e-37	208.74	7	-0.12692	A3;A9;B10;B6	0	0	28222000	0	0	0	0	0	113970000	0	50119000	0	0	0	0	0	0	0	0	--	--	--	--	--	--	--	--	--	71096000	0.8528	50119000	--
480	IDKTDYMVGSYGPR	IDKTDYM(ox)VGSYGPR	1	1600.76	2;3	K	A	14	sp|P52565|GDIR1_HUMAN	139	152	yes	2.0692e-37	208.74	23	-2.3564	A1;A10;A3;A4;A5;A6;A7;A8;A9;B1;B10;B2;B3;B4;B5;B6	68631000	39607000	59019000	23420000	0	57546000	56552000	17564000	308660000	6363100	38433000	48416000	56213000	51788000	577460	131370000	0	0	0	10.7858	1.03055	1.04992	0.452228	--	0.438045	--	--	--	78874875	1.1992	4.75944e+07	0.9039
481	KSASDLTWDNLKGK		2	1561.81	2;3	K	K	14	sp|P02787|TRFE_HUMAN	453	466	yes	2.0765e-37	257.38	29	-0.53045	A10;A6;A7;A9;B10;B6;B8;B9	0	0	0	0	0	35946000	181760000	0	41136000	0	69139000	0	0	0	0	780430000	0	131370000	233170000	--	--	--	--	--	0.0460592	--	--	0.176421	8.62807e+07	0.9588	303527250	1.0709
482	TFTTQETITNAETAK	TFTTQETITN(de)AETAK	0	1654.81	2	K	E	15	sp|P06744|G6PI_HUMAN;CON__Q3ZBD7	212	226	yes	2.3027e-37	226.33	30	-0.81021	A1;A4;A5;A6;A9;B1;B2;B3;B4;B5;B6	93117000	0	0	48644000	116410000	39711000	0	0	305490000	9955300	0	108580000	84907000	85489000	3434400	67194000	0	0	0	9.35351	--	--	0.569009	33.8953	0.59099	--	--	--	120674400	0.8952	5.99266e+07	0.723
483	DPVASTSNLDMDFR		0	1566.7	2	K	G	14	sp|P55058|PLTP_HUMAN	222	235	yes	2.5014e-37	194.5	2	NAN	B1	0	0	0	0	0	0	0	0	0	0	0	0	0	0	0	0	0	0	0	--	--	--	--	--	--	--	--	--	0	--	0	--
484	MMDYLQGSGETPQTDVR		0	1926.85	2	K	W	17	sp|Q14697|GANAB_HUMAN	338	354	yes	1.0257e-36	170.18	3	-1.1983	A3;B3;B7	0	0	28492000	0	0	0	0	0	0	0	0	0	9604500	0	0	0	0	0	0	--	--	2.96653	--	--	--	--	--	--	28492000	--	9604500	--
485	VIHDNFGIVEGLMTTVHAITATQK	VIHDNFGIVEGLM(ox)TTVHAITATQK	0	2594.35	3;4	K	T	24	sp|P04406|G3P_HUMAN	163	186	yes	1.303e-36	179.38	10	-0.99081	A1;A4;A5;A9;B1;B2;B3;B4	0	0	0	235170000	443050000	0	0	0	220790000	28525000	0	27550000	571960000	906270000	0	0	0	0	0	--	--	--	0.259492	--	--	--	--	--	299670000	0.4151	383576250	1.1279
486	TITDVINIGIGGSDLGPLMVTEALKPYSSGGPR		1	3327.74	3	K	V	33	sp|P06744|G6PI_HUMAN	148	180	yes	2.7576e-36	164.84	4	-0.28895	A1;A4;A5;A9;B1;B2;B3;B4	55395000	0	0	35784000	102970000	0	0	0	77458000	12903000	0	150420000	65319000	69527000	0	0	0	0	0	4.29319	--	--	0.514678	--	--	--	--	--	67901750	0.4259	74542250	0.7615
487	HNQLPLVIEFTEQTAPK		0	1964.04	2;3	K	I	17	sp|P07237|PDIA1_HUMAN	231	247	yes	3.6366e-36	207.52	16	-0.40697	A1;A4;A5;A8;A9;B1;B3;B4;B6	26232000	0	0	16604000	68718000	0	0	102100000	175790000	18666000	0	0	65854000	52080000	0	85036000	0	0	0	1.40534	--	--	0.318817	--	--	--	--	--	77888800	0.8291	55409000	0.5049
488	QVQLVQSGGGVVQPGR	Q(de)VQLVQ(de)SGGGVVQPGR;QVQLVQ(de)SGGGVVQPGR;(gl)QVQLVQSGGGVVQPGR	0	1607.87	2	-	S	16	sp|P0DOX5|IGG1_HUMAN	1	16	yes	3.852e-36	215.5	35	-1.7795	A1;A10;A3;A4;A5;A6;A7;A8;B1;B10;B2;B3;B4;B5;B6;B7;B8;B9	48265000	174980000	74415000	47257000	79445000	197050000	71662000	165640000	0	18564000	107670000	38093000	54904000	150090000	177880	192690000	112880000	199060000	12688000	2.59992	1.62515	1.35537	0.314858	446.621	1.02263	0.634851	0.832111	--	107339250	0.5706	88681688	0.84
489	IIPGGIYDADLNDEWVQR		0	2073.02	2;3	R	A	18	sp|P01036|CYTS_HUMAN	29	46	yes	5.8219e-36	184.31	39	-2.6381	A1;A3;A4;A5;A9;B1;B2;B3;B4;B5;B6;B7	5569600000	0	63612000	3168700000	3064100000	0	0	0	1309800000	5775300000	0	3038500000	2972600000	1937500000	20965000	71660000	1609700000	0	0	0.964383	--	0.0213994	1.63546	146.153	--	--	--	--	2635162400	0.7926	2.20375e+09	0.9033
490	KKFDDGEDPLDAESQQGGGGNPFHR		2	2700.22	3;4;5	R	S	25	sp|Q13217|DNJC3_HUMAN	456	480	yes	6.5167e-35	192.27	15	-0.97789	A3;A8;B1;B10;B7;B8;B9	0	0	41301000	0	0	0	0	12535000	0	13502000	50138000	0	0	0	0	0	258030000	21155000	32838000	--	--	--	--	--	--	--	0.592531	--	26918000	0.7557	75132600	1.3732
491	ALGFEAAESSLTKDALVLTPASLWKPSSPVSQ		2	3299.73	3;4	K	-	32	sp|Q8TDL5|BPIB1_HUMAN	453	484	yes	7.0805e-35	157.08	2	0.05798	A6	0	0	0	0	0	421330000	0	0	0	0	0	0	0	0	0	0	0	0	0	--	--	--	--	--	--	--	--	--	421330000	--	0	--
492	FHLGEPEASTQFMTQNYQDSPTLQAPR		0	3092.43	3	R	E	27	sp|Q96S96|PEBP4_HUMAN	184	210	yes	8.5796e-35	186.02	1	1.0586	B1	0	0	0	0	0	0	0	0	0	19592000	0	0	0	0	0	0	0	0	0	--	--	--	--	--	--	--	--	--	0	--	19592000	--
493	NVVDGQPFTNWYDNGSNQVAFGRGNR	NVVDGQPFTNWYDN(de)GSNQVAFGRGNR;N(de)VVDGQPFTNWYDN(de)GSNQVAFGRGNR	1	2911.34	2;3;4	R	G	26	sp|P04745|AMY1_HUMAN;sp|P19961|AMY2B_HUMAN;sp|P04746|AMYP_HUMAN	414	439	no	9.2373e-35	190.91	30	-2.474	A10;A6;A7;A8;B10;B7;B8;B9	0	2144400000	0	0	0	121970000	691780000	950770000	0	0	198860000	0	0	0	0	0	1067600000	234850000	1049000000	--	10.7835	--	--	--	--	0.647977	4.04841	--	977230000	0.8715	637577500	0.7624
494	EQLGPVTQEFWDNLEKETEGLRQEMSK		2	3220.53	4	R	D	27	sp|P02647|APOA1_HUMAN	86	112	yes	1.0343e-34	181.37	5	-1.2673	A1;A5;A6;B2;B3	29018000	0	0	0	100040000	160730000	0	0	0	0	0	208390000	84166000	0	0	0	0	0	0	--	--	--	--	--	--	--	--	--	96596000	0.6825	146278000	0.6005
495	LKPNTPFAATSSMGLETEEQEPSIIGK	LKPNTPFAATSSM(ox)GLETEEQEPSIIGK	1	2874.43	3	K	L	27	sp|Q08188|TGM3_HUMAN	460	486	yes	1.4049e-34	136.16	10	-1.4255	A5;B1;B3;B4	0	0	0	0	56569000	0	0	0	0	23229000	0	0	21530000	121970000	0	0	0	0	0	--	--	--	--	--	--	--	--	--	56569000	--	5.55763e+07	1.0347
496	ELASQPDVDGFLVGGASLKPEFVDIINAK	ELASQ(de)PDVDGFLVGGASLKPEFVDIIN(de)AK	1	3028.58	3	K	Q	29	sp|P60174|TPIS_HUMAN	257	285	yes	1.6205e-34	178.53	9	-1.5287	A4;A5;A9;B1;B2;B3;B4;B6	0	0	0	97107000	213720000	0	0	0	116720000	31282000	0	176110000	137240000	151820000	0	88125000	0	0	0	--	--	--	0.639619	--	--	--	--	--	1.42516e+08	0.4381	116915400	0.4932
497	APEPHVEEDDDDELDSKLNYKPPPQK		2	3004.39	4	K	S	26	sp|P52566|GDIR2_HUMAN	5	30	yes	3.2849e-34	181.81	14	-1.0866	A10;A7;B10;B9	0	75100000	0	0	0	0	35007000	0	0	0	44162000	0	0	0	0	0	0	0	67737000	--	1.70056	--	--	--	--	--	--	--	55053500	0.515	55949500	0.2979
498	SSQSLVHSDGNTYLSWLQQRPGQPPR		1	2937.45	3;4	R	L	26	sp|A0A075B6R9|KVD24_HUMAN;sp|A0A0C4DH68|KV224_HUMAN	45	70	no	3.8635e-34	183.42	6	-0.59621	A1;A4;A5;B1;B3;B4	59538000	0	0	51248000	10932000	0	0	0	0	52522000	0	0	31473000	12627000	0	0	0	0	0	1.13358	--	--	4.0586	--	--	--	--	--	4.05727e+07	0.6409	3.22073e+07	0.6197
499	VFVGEEDPEAESVTLR		0	1775.86	2	R	V	16	sp|Q86UX7|URP2_HUMAN	20	35	yes	6.1724e-34	167.44	2	-3.0465	B2;B3	0	0	0	0	0	0	0	0	0	0	0	0	26159000	0	0	0	0	0	0	--	--	--	--	--	--	--	--	--	0	--	26159000	--
500	AHYGGFTVQNEANKYQISVNK	AHYGGFTVQ(de)N(de)EAN(de)KYQ(de)ISVNK	1	2367.16	3;4	K	Y	21	sp|P02675|FIBB_HUMAN	354	374	yes	1.0475e-33	203.81	20	-1.1582	A3;A6;A7;A8;A9;B10;B8;B9	0	0	58757000	0	0	54302000	220630000	45131000	101420000	0	250000000	0	0	0	0	0	0	8094700	120500000	--	--	--	--	--	--	--	5.57538	0.84166	96048000	0.7593	1.26198e+08	0.9592
501	ATLKDQLIYNLLKEEQTPQNK	(ac)ATLKDQLIYNLLKEEQTPQNK	2	2486.34	3	M	I	21	sp|P00338|LDHA_HUMAN	2	22	yes	1.3767e-33	181.29	3	-0.087748	A6;A7;A9;B3;B4	0	0	0	0	0	65025000	51306000	0	95330000	0	0	0	50610000	29978000	0	0	0	0	0	--	--	--	--	--	--	--	--	--	7.05537e+07	0.3193	40294000	0.3621
502	TAFDEAIAELDTLSEESYKDSTLIMQLLR	TAFDEAIAELDTLSEESYKDSTLIM(ox)QLLR	1	3301.63	3	K	D	29	sp|P63104|1433Z_HUMAN	194	222	yes	1.7278e-33	168.11	1	1.3716	A9	0	0	0	0	0	0	0	0	46026000	0	0	0	0	0	0	0	0	0	0	--	--	--	--	--	--	--	--	--	46026000	--	0	--
503	DPSASPGDAGEQAIR		0	1469.67	2	R	Q	15	sp|P18206|VINC_HUMAN	286	300	yes	1.815e-33	194.5	17	-0.63095	A1;A4;A5;A6;A7;A9;B2;B3;B4;B6	15256000	0	0	9323000	11113000	0	16210000	0	51894000	0	0	11329000	11245000	22169000	0	23719000	0	0	0	--	--	--	0.420542	--	--	--	--	--	20759200	0.8496	17115500	0.395
504	IKAEEKEVIENTEAVHQQFQK		2	2497.28	3;4	R	F	21	sp|Q9UIV8|SPB13_HUMAN	68	88	yes	2.2908e-33	201.32	14	-0.559	A3;A4;A5;A7;A8;A9;B4;B6;B7;B8;B9	0	0	100350000	14934000	16448000	0	142470000	82578000	105690000	0	0	0	0	30903000	0	266230000	182910000	19116000	56055000	--	--	--	0.483254	--	--	0.778908	4.31984	1.88547	7.70783e+07	0.6667	111042800	0.9777
505	VNHPGSKDQLKEVWEETDGLDPNDFDPK	VNHPGSKDQLKEVWEETDGLDPN(de)DFDPK	2	3208.49	3;4;5	K	T	28	sp|P80303|NUCB2_HUMAN	220	247	yes	3.8208e-33	167.48	21	-0.74226	A10;A3;A8;B10;B7;B8;B9	0	221300000	343580000	0	0	0	0	690350000	0	0	268970000	0	0	0	0	0	2003900000	201360000	65722000	--	0.822768	--	--	--	--	--	3.42844	--	418410000	0.5815	634988000	1.4434
506	GNWDEQFDKENTEER		1	1895.79	2;3	R	L	15	sp|P35237|SPB6_HUMAN	171	185	yes	5.6029e-33	174.05	13	-0.71356	A10;A6;A7;A8;A9;B6;B7	0	12372000	0	0	0	37981000	32654000	16388000	57152000	0	0	0	0	0	0	153100000	24441000	0	0	--	--	--	--	--	0.24808	1.33603	--	--	31309400	0.5748	88770500	1.0248
507	KFYQTSVESVDFANAPEESR		1	2303.07	2;3	K	K	20	sp|P29508|SPB3_HUMAN	125	144	yes	7.0643e-33	226.7	20	-0.96333	A1;A3;A4;A5;A6;A7;A8;A9;B3;B4;B6;B7	0	0	101170000	9007000	17696000	54989000	75623000	87632000	118120000	0	0	0	9477500	24422000	0	77015000	107980000	0	0	--	--	10.6748	0.368807	--	0.714004	0.700343	--	--	6.63196e+07	0.6222	54723625	0.8373
508	VTLQPYNVAQLQSSVDLSGSK		0	2233.16	2;3	R	V	21	sp|Q9Y6R7|FCGBP_HUMAN	193	213	yes	7.9985e-33	254.56	11	-0.92298	A1;A3;A4;A5;A8;A9;B1;B2;B7	85821000	0	99034000	46716000	203780000	0	0	77535000	151260000	237370000	0	19365000	0	0	0	0	136340000	0	0	0.361549	--	--	--	--	--	--	--	--	110691000	0.5152	131025000	0.8327
509	FFGHGAEDSLADQAANEWGR		0	2176.96	3	R	S	20	sp|P0DJI8|SAA1_HUMAN	86	105	yes	8.1356e-33	156.22	5	-1.9151	A4;A5;B1;B4	0	0	0	16478000	14898000	0	0	0	0	38840000	0	0	0	25230000	0	0	0	0	0	--	--	--	0.653111	--	--	--	--	--	15688000	0.0712	32035000	0.3004
510	KFDLGQDVIDFTGHALALYR		1	2278.17	3;4	K	T	20	sp|P50395|GDIB_HUMAN	174	193	no	8.6998e-33	195.56	6	-0.10016	A1;A4;A5;B2;B3;B4	12194000	0	0	22042000	58581000	0	0	0	0	0	0	40830000	48185000	94578000	0	0	0	0	0	--	--	--	0.233056	--	--	--	--	--	30939000	0.7899	6.11977e+07	0.4762
511	TMNNFLDREQYGQYALAVR	TMN(de)NFLDREQYGQYALAVR	1	2288.1	3	R	G	19	sp|Q02413|DSG1_HUMAN	220	238	yes	1.0397e-32	201.12	6	-3.1739	A3;A4;B3;B4;B7	0	0	77184000	26708000	0	0	0	0	0	0	0	0	14225000	53661000	0	0	86839000	0	0	--	--	5.42594	0.497717	--	--	--	--	--	51946000	0.6871	51575000	0.7048
512	TMGMVDIFNGDADLSGMTGSR	TMGMVDIFN(de)GDADLSGMTGSR	0	2173.94	2	R	G	21	sp|P29508|SPB3_HUMAN	301	321	yes	1.4742e-32	202.4	3	-0.77676	A5;B6;B7	0	0	0	0	19099000	0	0	0	0	0	0	0	0	0	0	71775000	43798000	0	0	--	--	--	--	--	--	--	--	--	19099000	--	57786500	0.3423
513	AEEKEVIENTEAVHQQFQK		1	2256.1	3	K	F	19	sp|Q9UIV8|SPB13_HUMAN	70	88	yes	1.63e-32	197.38	5	-0.68446	A1;A4;A5;A8;A9;B2;B4	9910200	0	0	8980400	17955000	0	0	25354000	209440000	0	0	9346100	0	24968000	0	0	0	0	0	--	--	--	0.359676	--	--	--	--	--	54327920	1.6007	17157050	0.6438
514	TETQEKNPLPSKETIEQEK		2	2228.12	3;4	K	Q	19	sp|P62328|TYB4_HUMAN	21	39	yes	1.7995e-32	199.15	48	-0.79449	A1;A10;A3;A5;A6;A7;A8;A9;B10;B3;B7;B9	84107000	68514000	15585000	0	24685000	70488000	116550000	37197000	43345000	0	169010000	0	12331000	0	0	0	14283000	0	158370000	--	0.405384	1.26389	--	--	--	8.16005	--	0.273695	57558875	0.5848	88498500	0.9823
515	LVPLLDTGDIIIDGGNSEYR	LVPLLDTGDIIIDGGN(de)SEYR	0	2159.11	2;3	K	D	20	sp|P52209|6PGD_HUMAN	88	107	yes	1.8988e-32	246.31	7	-2.0706	A1;A5;B3;B4	63849000	0	0	0	45971000	0	0	0	0	0	0	0	96925000	87280000	0	0	0	0	0	--	--	--	--	--	--	--	--	--	54910000	0.2302	92102500	0.074
516	NYPENTYYSNFISHLANIK	NYPENTYYSN(de)FISHLANIK	0	2287.09	2;3	K	Y	19	sp|P23280|CAH6_HUMAN	170	188	yes	3.3962e-32	210.56	71	-2.5976	A1;A3;A4;A5;A6;B1;B2;B3;B4	3372500000	0	27342000	3738100000	2329600000	164720000	0	0	0	4565400000	0	3256700000	1776500000	1709700000	0	0	0	0	0	0.738709	--	0.0153909	2.18641	--	--	--	--	--	1926452400	0.9083	2827075000	0.4815
517	HSIFTPETNPR		0	1297.64	2;3	R	A	11	sp|P00747|PLMN_HUMAN	513	523	yes	5.3313e-32	207.29	33	-3.8625	A1;A10;A3;A4;A5;A6;A7;A8;B10;B2;B3;B4;B6;B7;B8;B9	11473000	17989000	81334000	8791700	2948800	51774000	153910000	36249000	0	0	48236000	22613000	9073100	10638000	0	60177000	96777000	72588000	89265000	--	0.372937	8.9643	0.826443	--	0.860362	1.59036	0.49938	--	4.55587e+07	1.1203	5.11709e+07	0.6733
518	VQLSNDFDEYIMAIEQTIK		0	2256.1	2;3	K	S	19	sp|P01024|CO3_HUMAN	1552	1570	yes	5.9001e-32	247.32	10	-2.0483	A3;A6;A7;A9;B10;B2;B3;B4;B6;B7	0	0	44499000	0	0	68873000	24136000	0	61183000	0	85270000	48450000	57409000	74518000	0	350000000	23342000	0	0	--	--	0.775122	--	--	0.19678	1.03402	--	--	49672750	0.3993	1.06498e+08	1.1382
519	RLYGSEAFATDFQDSAAAK		1	2046.96	2;3	K	K	19	sp|P01011|AACT_HUMAN	159	177	yes	5.9521e-32	203.99	9	-0.71792	A3;A6;A7;B10;B6;B8;B9	0	0	107400000	0	0	172440000	36419000	0	0	0	164200000	0	0	0	0	58216000	0	35053000	163960000	--	--	--	--	--	2.96207	--	--	--	1.0542e+08	0.6453	105357250	0.6498
520	NAEENLIYDYHLIDKLENK	N(de)AEENLIYDYHLIDKLENK	1	2333.15	2;3;4	R	F	19	sp|P20061|TCO1_HUMAN	107	125	yes	6.2981e-32	251.28	23	-1.769	A1;A3;A4;A5;B1;B2;B3;B4	458070000	0	163400000	1003300000	727290000	0	0	0	0	755320000	0	1165300000	716980000	628450000	0	0	0	0	0	0.606458	--	0.2279	1.59647	--	--	--	--	--	588015000	0.6124	816512500	0.2921
521	RFDDAVVQSDMK		1	1409.66	2;3	R	H	12	sp|P11142|HSP7C_HUMAN	77	88	yes	7.7857e-32	194.17	36	-1.0672	A10;A3;A4;A5;A6;A7;A8;A9;B1;B10;B2;B3;B4;B6;B7	0	17109000	93058000	0	74114000	80045000	0	50872000	376160000	19448000	0	25226000	38984000	40498000	0	180840000	88133000	0	0	--	--	2.38708	--	--	0.442629	--	--	--	1.15226e+08	1.1334	65521500	0.938
522	LQLWDTAGQER		0	1315.65	2	R	F	11	sp|Q9NRW1|RAB6B_HUMAN;sp|P20340|RAB6A_HUMAN;sp|Q14964|RB39A_HUMAN	64	74	yes	1.1781e-31	206.78	9	-0.37524	A1;A3;A4;A5;A7;A8;A9;B10;B6;B7	29407000	0	59212000	24855000	34678000	0	58832000	35570000	92089000	0	49926000	0	0	0	0	61109000	0	0	0	--	--	--	--	--	--	--	--	--	4.78061e+07	0.4979	55517500	0.1424
523	VDIPALGVSVTFNGQVFQAR	VDIPALGVSVTFN(de)GQVFQAR	0	2117.13	2;3	R	L	20	sp|Q9HC84|MUC5B_HUMAN	5188	5207	yes	1.2292e-31	194.59	10	0.15304	A1;A4;A5;B1;B2;B3;B4	35587000	0	0	62264000	93673000	0	0	0	0	17137000	0	83685000	80611000	190210000	0	0	0	0	0	2.07662	--	--	0.327343	--	--	--	--	--	6.38413e+07	0.4554	92910750	0.7723
524	ILDWHVANTDKK	ILDWHVAN(de)TDKK	1	1438.76	2;3;4	R	S	12	sp|P37837|TALDO_HUMAN	193	204	yes	2.1238e-31	187.33	119	-1.3069	A1;A10;A3;A4;A5;A6;A7;A8;A9;B1;B10;B2;B3;B4;B6;B7;B8;B9	169040000	420080000	430870000	14653000	138340000	517870000	708050000	492390000	2229100000	9905600	411490000	137090000	199570000	156410000	0	1927100000	179560000	27852000	247170000	17.0651	1.02088	2.15899	0.0936833	--	0.26873	3.94325	17.6788	9.01849	5.68933e+08	1.1589	3.66239e+08	1.6306
525	GATASQLEEVFHSEKETK		1	1989.96	3;4	R	S	18	sp|Q9UIV8|SPB13_HUMAN	47	64	yes	3.4482e-31	206.74	21	-0.75842	A10;A3;A6;A8;A9;B4;B6;B7	0	44168000	86818000	0	0	129060000	0	45068000	526170000	0	0	0	0	11201000	0	228270000	59067000	0	0	--	--	--	--	--	0.565383	--	--	--	166256800	1.2283	9.95127e+07	1.1461
526	SAAEAGGVFHR	(ac)SAAEAGGVFHR	0	1100.54	2	M	A	11	sp|Q9BRF8|CPPED_HUMAN	2	12	yes	3.6262e-31	195.05	25	-2.0922	A1;A10;A3;A5;A7;A8;A9;B10;B2;B3;B4;B6;B7;B8;B9	14780000	21419000	55803000	0	12818000	0	84536000	36415000	109550000	0	33784000	4757500	8092300	18044000	0	165680000	57637000	13637000	53774000	--	0.633998	6.89581	--	--	--	1.4667	2.67031	2.03723	47903000	0.7795	44425725	1.1916
527	SGVYQHVTGEMMGGHAIR	SGVYQHVTGEM(ox)MGGHAIR	0	1928.9	2;3;4	K	I	18	sp|P07858|CATB_HUMAN	264	281	yes	3.6844e-31	167.35	93	-1.7369	A1;A10;A3;A4;A5;A6;A7;A8;A9;B1;B10;B2;B3;B4;B6;B7;B8;B9	145990000	68448000	294740000	241800000	173970000	154810000	362060000	137350000	571350000	327100000	326910000	109600000	178250000	300280000	0	366240000	797370000	19414000	69614000	0.446316	0.209379	1.65352	0.805248	--	0.422701	0.454068	7.07479	8.2074	2.38946e+08	0.6417	2.77198e+08	0.8378
528	PPYTVVYFPVR		0	1336.72	2	M	G	11	sp|P09211|GSTP1_HUMAN	2	12	yes	4.2842e-31	204.36	36	-0.2538	A1;A10;A3;A4;A5;A6;A7;A8;A9;B1;B10;B2;B3;B4;B5;B6;B7;B8;B9	240440000	199070000	289270000	351970000	444320000	275500000	241570000	528440000	801190000	164560000	140470000	490410000	367910000	500880000	2395600	754380000	361540000	28982000	93471000	1.46111	1.41717	0.786252	0.702703	185.473	0.365201	0.668169	18.2334	8.57154	3.74641e+08	0.5122	290499860	0.8424
529	NTLYLQMNNLR	NTLYLQMN(de)NLR	0	1378.7	2	K	A	11	sp|A0A0C4DH36|HV338_HUMAN	94	104	yes	9.3146e-31	204.7	6	-1.8526	A5;B3;B4	0	0	0	0	0	0	0	0	0	0	0	0	37234000	105360000	0	0	0	0	0	--	--	--	--	--	--	--	--	--	0	--	71297000	0.6757
530	EEAENTLQSFR		0	1322.61	2	R	Q	11	sp|P08670|VIME_HUMAN	197	207	yes	9.8149e-31	200.05	3	-1.5972	B2;B3	0	0	0	0	0	0	0	0	0	0	0	23305000	16077000	0	0	0	0	0	0	--	--	--	--	--	--	--	--	--	0	--	19691000	0.2596
531	VFSNGADLSGVTEEAPLK	VFSN(de)GADLSGVTEEAPLK	0	1832.92	2;3	K	L	18	sp|P01009|A1AT_HUMAN	335	352	yes	1.0728e-30	207.41	78	-1.0005	A1;A10;A3;A4;A5;A6;A7;A8;A9;B1;B10;B2;B3;B4;B5;B6;B7;B8;B9	386010000	387320000	339320000	163170000	843150000	965980000	783700000	475970000	744840000	150640000	721060000	671970000	1023700000	394060000	660810	866420000	186030000	589470000	816390000	2.56247	0.537154	0.331464	0.414074	1275.93	1.11491	4.21276	0.807454	0.912358	5.65496e+08	0.4852	542040081	0.6327
532	VMDKYTFELSR	VM(ox)DKYTFELSR	1	1387.68	2;3	K	R	11	sp|P02774|VTDB_HUMAN	342	352	yes	1.3862e-30	202.2	107	-2.3515	A1;A10;A3;A4;A5;A6;A7;A8;A9;B1;B10;B2;B3;B4;B5;B6;B7;B8;B9	95724000	123730000	330150000	36117000	87467000	338760000	521150000	207680000	275220000	25279000	380400000	99385000	121430000	99174000	556940	742910000	207050000	328290000	506050000	3.7867	0.325263	2.71885	0.364178	157.049	0.455991	2.51702	0.632611	0.543859	2.24e+08	0.6989	251052494	0.9465
533	LVSLTLNLVTR	LVSLTLN(de)LVTR	0	1227.76	2	R	A	11	sp|P01833|PIGR_HUMAN	526	536	yes	1.3881e-30	196.88	58	-0.53372	A1;A3;A4;A5;A9;B1;B2;B3;B4;B5	175200000	0	41725000	92757000	123360000	0	0	0	64558000	121870000	0	168900000	195940000	148130000	1171100	0	0	0	0	1.4376	--	0.212948	0.626186	105.337	--	--	--	--	99520000	0.5246	127202220	0.5937
534	KDLQNFLK	KDLQN(de)FLK	1	1004.57	1;2;3	R	K	8	sp|P06702|S10A9_HUMAN	43	50	yes	1.4888e-30	210.26	218	-1.7068	A1;A10;A3;A4;A5;A6;A7;A8;A9;B1;B10;B2;B3;B4;B5;B6;B7;B8;B9	401470000	391470000	2431000000	362720000	2384000000	990130000	3188600000	1836200000	624210000	197250000	6197800000	100520000	564740000	708020000	24246000	3234400000	2851400000	324670000	394590000	2.03534	0.0631627	4.30464	0.512302	98.3255	0.306125	1.11826	5.65559	1.58192	1.40109e+09	0.7687	1459763600	1.3857
535	FTEEEEQLSR		0	1266.57	2	K	K	10	sp|O00748|EST2_HUMAN	476	485	yes	1.6512e-30	206.78	22	-1.2291	A1;A10;A3;A4;A5;A6;A7;A8;A9;B10;B2;B3;B4;B5;B6;B7;B8;B9	9519400	9184700	69612000	17689000	23546000	48470000	33251000	38229000	178360000	0	10396000	10352000	8842700	37636000	1255500	169260000	58346000	4146600	13154000	--	0.883484	7.87226	0.470002	18.7543	0.286364	0.569893	9.21936	13.5594	4.75401e+07	1.11	3.4821e+07	1.5413
536	AAYEDFNVQLR	AAYEDFN(de)VQLR	0	1324.64	2;3	R	R	11	sp|Q9HC84|MUC5B_HUMAN	109	119	yes	1.7319e-30	194.2	109	-2.2327	A1;A10;A3;A4;A5;A6;A7;A8;A9;B1;B10;B2;B3;B4;B5;B6;B7;B8;B9	1312000000	1200500000	9529600000	1993500000	2611200000	5004700000	4025300000	1360100000	10255000000	2570200000	3725700000	2153900000	1418400000	2751300000	9940700	7174500000	2929300000	917130000	1460000000	0.510466	0.322221	6.71856	0.724567	262.678	0.697568	1.37415	1.483	7.02397	4.14354e+09	0.8469	2511037070	0.7818
537	NTLYLQMNSLR	NTLYLQMN(de)SLR;NTLYLQM(ox)NSLR;N(de)TLYLQMN(de)SLR	0	1351.69	2	K	A	11	sp|A0A0B4J1X5|HV374_HUMAN;sp|P01767|HV353_HUMAN;sp|A0A0C4DH42|HV366_HUMAN;sp|P0DP03|HVC05_HUMAN;sp|P0DP02|HVC33_HUMAN;sp|P01772|HV333_HUMAN;sp|P01768|HV330_HUMAN;sp|P01764|HV323_HUMAN	96	106	no	2.2014e-30	200.6	74	-2.1292	A1;A3;A4;A5;A6;A7;A9;B1;B2;B3;B4;B5;B7	599760000	0	205570000	460090000	579810000	172730000	99038000	0	1067200000	422910000	0	366590000	942590000	799170000	7714100	0	158940000	0	0	1.41817	--	0.218091	0.57571	75.1624	--	0.623116	--	--	4.54885e+08	0.74	449652350	0.8034
538	FQLFGSPSGQK		0	1194.6	1;2	K	D	11	sp|P02788|TRFL_HUMAN	305	315	yes	2.35e-30	201.84	57	-1.0212	A1;A10;A3;A4;A5;A6;A7;A8;A9;B1;B10;B2;B3;B4;B5;B6;B7;B8;B9	482600000	200600000	1201300000	770540000	1011500000	7262700000	379730000	456150000	1752400000	333600000	772150000	224520000	2076900000	1810100000	10384000	216200000	1376700000	38366000	208130000	1.44664	0.259794	0.57841	0.425689	97.4095	33.5925	0.275826	11.8894	8.41974	1.50195e+09	1.4738	706705000	1.09
539	DLSSHQLNEFLAQTLQR		0	1999.01	3	K	A	17	sp|P09960|LKHA4_HUMAN	494	510	yes	2.8324e-30	203.9	4	-0.082182	A1;A4;A5;B3;B4	24201000	0	0	16842000	33117000	0	0	0	0	0	0	0	33212000	37598000	0	0	0	0	0	--	--	--	0.447949	--	--	--	--	--	24720000	0.3297	35405000	0.0876
540	LEPVLHEGLETVDNTLK	LEPVLHEGLETVDN(de)TLK	0	1906	2;3	K	G	17	sp|Q96DR5|BPIA2_HUMAN	36	52	yes	2.941e-30	253.16	46	-1.4553	A1;A3;A4;A5;A6;A8;A9;B1;B10;B2;B4;B9	191440000	0	461570000	188130000	546720000	603720000	0	578020000	1525700000	449460000	57729000	23623000	0	20079000	0	0	0	0	463210000	0.425933	--	--	9.36949	--	--	--	--	3.29375	5.85043e+08	0.769	202820200	1.1436
541	VQAAVGTSAAPVPSDNH		0	1619.79	2	K	-	17	sp|P02649|APOE_HUMAN	301	317	yes	3.2856e-30	206.69	9	-0.35049	A6;A7;A9;B10;B8;B9	0	0	0	0	0	26754000	49054000	0	13160000	0	0	0	0	0	0	0	0	11928000	22918000	--	--	--	--	--	--	--	--	0.574221	29656000	0.6111	17423000	0.446
542	SFEDRYDYYSKAEAHFER		2	2312.01	2;3;4;5	K	S	18	sp|Q6P5S2|LEG1H_HUMAN	221	238	yes	4.112e-30	206.13	99	-1.1867	A10;A3;A6;A7;A8;A9;B10;B6;B7;B8;B9	0	1349400000	3626400000	0	0	1496100000	1006500000	966690000	3591600000	0	2661100000	0	0	0	0	2263500000	4832700000	156290000	356770000	--	0.507084	--	--	--	0.660968	0.208269	6.18523	10.067	2006115000	0.627	2054072000	0.9306
543	GILFVGSGVSGGEEGAR		0	1590.8	2	K	Y	17	sp|P52209|6PGD_HUMAN	120	136	yes	5.2169e-30	206.1	33	-1.1636	A1;A10;A3;A4;A5;A7;A8;A9;B1;B10;B2;B3;B4;B5;B6;B7;B8;B9	189510000	319080000	296790000	131660000	183070000	0	334130000	409860000	908370000	60991000	265940000	38174000	192500000	272470000	2768800	711570000	684500000	151230000	257480000	3.10718	1.19982	1.54177	0.483209	66.1189	--	0.488137	2.71018	3.52792	346558750	0.7073	263762380	0.9419
544	ALPGQLKPFETLLSQNQGGK	ALPGQLKPFETLLSQN(de)QGGK	1	2125.15	2;3	K	T	20	sp|P09211|GSTP1_HUMAN	122	141	yes	6.4984e-30	160.87	37	-3.9709	A1;A10;A3;A4;A5;A6;A7;A8;A9;B1;B10;B2;B3;B4;B6;B7;B8;B9	458910000	517380000	790420000	145910000	834630000	539380000	566840000	495810000	936770000	648050000	471040000	1514000000	288030000	717700000	0	696730000	832970000	174080000	233920000	0.70814	1.09838	2.74423	0.203302	--	0.774159	0.680505	2.84817	4.00466	5.87339e+08	0.4046	6.19613e+08	0.6608
545	AQEQIPPGVYHISLVLTDSQNNR	AQEQIPPGVYHISLVLTDSQ(de)NNR	0	2578.31	3	R	C	23	sp|P32926|DSG3_HUMAN	553	575	yes	9.5052e-30	157.15	16	-0.91215	A1;A4;A5;B1;B2;B3;B4	18719000	0	0	93901000	45092000	0	0	0	0	45164000	0	90353000	44124000	160030000	0	0	0	0	0	0.414467	--	--	0.586771	--	--	--	--	--	5.25707e+07	0.7256	84917750	0.642
546	HYGGLTGLNKAETAAK	HYGGLTGLN(de)KAETAAK	1	1629.85	2;3;4	R	H	16	sp|P18669|PGAM1_HUMAN;sp|Q8N0Y7|PGAM4_HUMAN;sp|P15259|PGAM2_HUMAN	91	106	yes	9.9482e-30	219.26	40	-1.1821	A10;A3;A6;A7;A8;A9;B10;B6;B7;B8;B9	0	47315000	204240000	0	0	66731000	213280000	351240000	103110000	0	231730000	0	0	0	0	414970000	243750000	40250000	200930000	--	0.204182	--	--	--	0.160809	0.874995	8.72646	0.513164	1.64319e+08	0.6986	226326000	0.5894
547	SNVSDAVAQSTR	SN(de)VSDAVAQSTR	0	1233.59	2;3	K	I	12	sp|P60174|TPIS_HUMAN	232	243	yes	1.1536e-29	206.36	30	-2.7119	A1;A10;A4;A5;A6;A8;B1;B10;B2;B3;B4;B6;B7;B8;B9	0	63748000	0	7246900	62534000	0	0	30568000	0	10044000	9549800	70689000	47305000	22572000	0	80787000	11066000	113090000	16955000	--	6.67532	--	0.321057	--	--	--	0.270298	--	41024225	0.6645	4.24509e+07	0.8909
548	HFVALSTNTTK	HFVALSTN(de)TTK	0	1217.64	2;3	K	V	11	sp|P06744|G6PI_HUMAN	242	252	yes	1.3273e-29	192.26	28	-0.42325	A1;A10;A4;A5;A8;A9;B1;B10;B2;B3;B4;B5;B6;B8;B9	11250000	18135000	0	36923000	78680000	0	0	8550600	5014900	4227700	16453000	71969000	73271000	55705000	887160	14312000	0	4993400	10462000	2.66102	1.10223	--	0.662831	88.6875	--	--	1.71238	0.479344	2.64256e+07	1.0593	28031140	1.0708
549	TFVNITPAEVGVLVGKDR		1	1914.06	2;3	K	S	18	sp|P07737|PROF1_HUMAN	39	56	yes	1.6823e-29	202.13	8	-0.81268	A10;A8;A9;B10;B7;B9	0	129980000	0	0	0	0	0	167380000	777950000	0	117950000	0	0	0	0	0	79323000	0	129380000	--	1.10199	--	--	--	--	--	--	6.01291	3.58437e+08	1.0149	1.08884e+08	0.2409
550	AAVPSGASTGIYEALELRDNDKTR	AAVPSGASTGIYEALELRDN(de)DKTR	2	2533.28	3;4	R	Y	24	sp|P06733|ENOA_HUMAN	33	56	yes	1.75e-29	146.06	25	-2.169	A10;A3;A6;A7;A8;A9;B10;B6;B7;B8;B9	0	421330000	165980000	0	0	141920000	328790000	673870000	114060000	0	354740000	0	0	0	0	431650000	1176900000	239080000	830070000	--	1.18771	--	--	--	0.328785	0.27937	2.8186	0.13741	3.07658e+08	0.7009	606488000	0.6409
551	TYSDHPEKVNKDDEEFIESNK		2	2523.14	3;4;5	K	M	21	sp|P00450|CERU_HUMAN	937	957	yes	1.9855e-29	185.92	33	-0.98772	A1;A4;A5;A6;A7;A8;A9;B10;B2;B3;B4;B6;B8;B9	18649000	0	0	6975300	0	191920000	271700000	21170000	173470000	0	102840000	10391000	29112000	12229000	0	101010000	0	50919000	101640000	--	--	--	0.57039	--	1.90001	--	0.415758	1.70671	1.13981e+08	0.9898	5.83059e+07	0.7347
552	TFYWDFYTNR		0	1411.62	2	K	T	10	sp|P12273|PIP_HUMAN	97	106	yes	2.2255e-29	195.32	9	-0.37255	A1;A4;A5;B1;B2;B3;B4	123370000	0	0	350290000	182450000	0	0	0	0	242850000	0	99634000	179270000	49131000	0	0	0	0	0	0.508009	--	--	7.12971	--	--	--	--	--	2.18703e+08	0.5383	142721250	0.5997
553	SMGGKEDLIWELLNQAQEHFGKDK	SM(ox)GGKEDLIWELLNQAQEHFGKDK;SM(ox)GGKEDLIWELLN(de)QAQEHFGKDK	2	2772.35	3;4;5	R	S	24	sp|P02787|TRFE_HUMAN	274	297	yes	2.8442e-29	184.3	42	-2.5834	A1;A3;A4;A5;A6;A7;A9;B1;B10;B2;B3;B4;B6	732100000	0	119940000	137800000	439050000	2327000000	170550000	0	491900000	30343000	46749000	611620000	3130300000	654970000	0	1325900000	0	0	0	24.1275	--	0.0383158	0.210391	--	1.75503	--	--	--	6.31191e+08	1.2373	966647000	1.2026
554	KVLGAFSDGLAHLDNLK		1	1796.98	2;3;4	K	G	17	sp|P02042|HBD_HUMAN;sp|P68871|HBB_HUMAN	67	83	no	3.0516e-29	196.18	26	-0.80908	A1;A4;A5;A6;A7;B1;B10;B3;B4;B6;B8;B9	187940000	0	0	22876000	281120000	476320000	573800000	0	0	13518000	585320000	0	373260000	56107000	0	297870000	0	95750000	854880000	13.9029	--	--	0.407721	--	1.59909	--	--	--	308411200	0.7167	3.25244e+08	0.9506
555	HIADLAGNSEVILPVPAFNVINGGSHAGNK	HIADLAGNSEVILPVPAFNVIN(de)GGSHAGNK;HIADLAGN(de)SEVILPVPAFNVIN(de)GGSHAGNK	0	3010.56	3;4	R	L	30	sp|P06733|ENOA_HUMAN	133	162	yes	4.0234e-29	165.31	20	-3.858	A1;A4;A5;A8;B1;B2;B3;B4;B6	100320000	0	0	143620000	209970000	0	0	63614000	0	64497000	0	95769000	230480000	303210000	0	78410000	0	0	0	1.55542	--	--	0.473665	--	--	--	--	--	129381000	0.4861	154473200	0.6884
556	AIAANEADAVTLDAGLVYDAYLAPNNLKPVVAEFYGSK	AIAANEADAVTLDAGLVYDAYLAPN(de)NLKPVVAEFYGSK	1	3953.01	3;4	R	E	38	sp|P02787|TRFE_HUMAN	70	107	yes	4.4306e-29	148.77	18	-2.9699	A1;A4;A5;B1;B2;B3;B4	182350000	0	0	119740000	292520000	0	0	0	0	51231000	0	439620000	262330000	231000000	0	0	0	0	0	3.55937	--	--	0.518355	--	--	--	--	--	1.98203e+08	0.4413	246045250	0.6465
557	KWNGEKMSYLK	KWN(de)GEKMSYLK;KWN(de)GEKM(ox)SYLK	2	1382.7	2;3;4	R	N	11	sp|P04745|AMY1_HUMAN;sp|P19961|AMY2B_HUMAN;sp|P04746|AMYP_HUMAN	283	293	no	4.7109e-29	193.83	124	-1.3755	A10;A3;A6;A7;A8;A9;B10;B6;B7;B8;B9	0	2709800000	78812000	0	0	142990000	1653800000	1483800000	403730000	0	1063400000	0	0	0	0	516450000	2989200000	564780000	1851000000	--	2.54824	--	--	--	0.276871	0.553258	2.62722	0.218115	1078822000	0.971	1396966000	0.744
558	HAEMVHTGLKLER		1	1519.79	3;4	K	A	13	sp|Q01518|CAP1_HUMAN	72	84	yes	5.3356e-29	193.81	20	-0.34934	A10;A8;A9;B6;B7;B9	0	199360000	0	0	0	0	0	95715000	18811000	0	0	0	0	0	0	28020000	133310000	0	92482000	--	--	--	--	--	--	--	--	0.203402	1.04629e+08	0.866	84604000	0.6275
559	AAYEDFNVQLRR	AAYEDFN(de)VQLRR	1	1480.74	2;3	R	G	12	sp|Q9HC84|MUC5B_HUMAN	109	120	yes	5.3631e-29	200.05	158	-1.1715	A10;A3;A6;A7;A8;A9;B10;B6;B7;B8;B9	0	514290000	2328800000	0	0	1010700000	2158300000	459150000	2091000000	0	1987000000	0	0	0	0	4760000000	2242500000	642280000	872560000	--	0.258827	--	--	--	0.212332	0.962453	0.714875	2.3964	1427040000	0.6054	2100868000	0.78
560	ALESPERPFLAILGGAK		1	1767.99	2;3	K	V	17	sp|P00558|PGK1_HUMAN	200	216	yes	5.4647e-29	199.13	25	-0.4797	A1;A10;A3;A4;A5;A6;A7;A8;A9;B1;B10;B2;B3;B4;B6;B7;B8;B9	167540000	82927000	56464000	118450000	309750000	65660000	46246000	173470000	454660000	52672000	92715000	57927000	344600000	193270000	0	314740000	124760000	4612600	36532000	3.18082	0.894429	0.163854	0.612873	--	0.208617	0.37068	37.6079	12.4455	1.63907e+08	0.8342	1.35759e+08	0.9057
561	LLIYAASSLQSGVPSR		0	1660.91	2;3	K	F	16	sp|A0A0C4DH72|KV106_HUMAN;sp|P01611|KVD12_HUMAN;sp|A0A0C4DH73|KV112_HUMAN;sp|P04432|KVD39_HUMAN;sp|P01597|KV139_HUMAN	68	83	no	5.7858e-29	205.46	53	-1.2761	A1;A10;A4;A5;A6;A7;A9;B1;B2;B3;B4	216810000	14747000	0	212820000	290150000	51554000	36391000	0	262300000	178840000	0	152500000	292100000	363880000	0	0	0	0	0	1.21231	--	--	0.584863	--	--	--	--	--	1.54967e+08	0.7515	246830000	0.4002
562	KYTLPPGVDPTQVSSSLSPEGTLTVEAPMPK		1	3225.65	3	R	L	31	sp|P04792|HSPB1_HUMAN	141	171	yes	6.3943e-29	159.86	13	-0.49727	A1;A4;A5;A8;A9;B1;B2;B3;B4	18432000	0	0	54645000	101140000	0	0	80351000	133290000	51748000	0	51860000	41956000	26915000	0	0	0	0	0	0.356188	--	--	2.03028	--	--	--	--	--	77571600	0.5653	43119750	0.2727
563	KALTGHLEEVVLALLK		1	1733.05	3	K	T	16	sp|P04083|ANXA1_HUMAN	98	113	yes	6.6916e-29	193.69	3	-0.50462	A1;A4;A5;B3;B4	8920900	0	0	28948000	17139000	0	0	0	0	0	0	0	84099000	20753000	0	0	0	0	0	--	--	--	1.39488	--	--	--	--	--	1.8336e+07	0.549	52426000	0.8544
564	QLNEINYEDHKLK	(gl)QLNEINYEDHKLK	1	1642.83	2;3	K	S	13	sp|P00751|CFAB_HUMAN	338	350	yes	6.7951e-29	196.88	12	-2.7166	A10;A7;A8;B10;B6;B7;B8;B9	0	21707000	0	0	0	0	28694000	47704000	0	0	30668000	0	0	0	0	34089000	26607000	172590000	207660000	--	0.707806	--	--	--	--	1.07844	0.276401	--	3.27017e+07	0.4114	94322800	0.9369
565	HNSSGSILFLGR	HN(de)SSGSILFLGR	0	1286.67	2;3	R	F	12	sp|P30740|ILEU_HUMAN	364	375	yes	6.8904e-29	199.68	79	-1.6903	A1;A10;A3;A4;A5;A6;A7;A8;A9;B10;B2;B3;B4;B5;B6;B7;B9	88239000	42994000	91698000	49794000	147080000	21980000	70737000	70624000	172990000	0	17574000	157990000	207180000	141850000	1401500	48432000	26866000	0	16346000	--	2.44645	0.442601	0.351033	104.945	0.453832	2.63296	--	10.583	8.40151e+07	0.5805	7.72049e+07	1.0265
566	ATLKDQLIYNLLK	(ac)ATLKDQLIYNLLK	1	1531.9	2	M	E	13	sp|P00338|LDHA_HUMAN	2	14	yes	8.2434e-29	193.96	2	-0.018522	A5;B2;B3	0	0	0	0	38681000	0	0	0	0	0	0	14905000	31723000	0	0	0	0	0	0	--	--	--	--	--	--	--	--	--	38681000	--	23314000	0.5101
567	YPALHKPENQDIDWGALEGETR	YPALHKPEN(de)QDIDWGALEGETR	1	2538.21	3;4	R	E	22	sp|P13796|PLSL_HUMAN	374	395	yes	8.6029e-29	159.46	18	-0.49388	A1;A4;A5;B1;B2;B3;B4	213870000	0	0	43299000	260310000	0	0	0	0	59426000	0	81270000	283300000	66695000	0	0	0	0	0	3.59893	--	--	0.649209	--	--	--	--	--	172493000	0.6625	122672750	0.8761
568	ATEDEYYRRPLQVLR		2	1907.99	2;3;4	K	A	15	sp|P01036|CYTS_HUMAN	58	72	yes	8.7231e-29	195.51	134	-0.65877	A10;A3;A6;A7;A8;A9;B10;B6;B7;B8;B9	0	1671300000	3019700000	0	0	2249300000	3519600000	1404500000	6597500000	0	6165900000	0	0	0	0	11146000000	8956300000	3346200000	6980500000	--	0.271055	--	--	--	0.201803	0.392975	0.41973	0.945133	3.07698e+09	0.6175	7318980000	0.4016
569	INSWVESQTNEK	IN(de)SWVESQTNEK	0	1433.68	2	K	I	12	sp|P29508|SPB3_HUMAN;sp|P48594|SPB4_HUMAN	147	158	no	9.009e-29	197.21	27	-0.93441	A1;A3;A5;A6;A7;A8;A9;B3;B4;B6;B7;B8;B9	8976600	0	140440000	0	40092000	78351000	87183000	57748000	276890000	0	0	0	9044400	84716000	0	290310000	82556000	20546000	25091000	--	--	15.5278	--	--	0.269887	1.05605	2.81067	11.0354	98525800	0.9002	8.53772e+07	1.2359
570	MIKPFFHSLSEK	M(ox)IKPFFHSLSEK	1	1462.76	2;3;4	K	Y	12	sp|P10599|THIO_HUMAN	37	48	yes	9.0778e-29	194.17	265	-4.418	A1;A10;A3;A4;A5;A6;A7;A8;A9;B1;B10;B2;B3;B4;B5;B6;B7;B8;B9	1349100000	660870000	1633900000	1402000000	1584300000	698080000	1533600000	1315600000	6803100000	681210000	892800000	2034300000	1217100000	2714200000	7096600	3275800000	2444300000	24871000	397220000	1.98045	0.740222	1.34245	0.516543	223.248	0.213102	0.627419	52.8969	17.1268	1.88673e+09	0.9954	1368889760	0.8565
571	LVGIQIQTLMQK	LVGIQIQTLM(ox)QK	0	1370.8	2;3	K	M	12	sp|P20061|TCO1_HUMAN	63	74	yes	9.2932e-29	196.88	27	-0.58544	A1;A3;A4;A5;A6;A9;B1;B2;B3;B4;B5	180580000	0	129720000	248830000	229970000	82772000	0	0	113770000	300640000	0	364740000	237260000	157380000	990020	0	0	0	0	0.600652	--	0.546742	1.58108	232.288	--	--	--	--	1.64274e+08	0.4049	212202004	0.6637
572	SLGDDISSETSGDFRK		1	1712.79	2;3	K	A	16	sp|P12429|ANXA3_HUMAN	139	154	yes	9.3483e-29	226.04	21	-0.68308	A10;A3;A6;A7;A8;A9;B10;B3;B6;B7	0	16205000	33496000	0	0	244600000	174760000	52470000	121230000	0	47974000	0	38685000	0	0	262240000	26824000	0	0	--	0.337787	0.865865	--	--	0.932733	6.51506	--	--	1.07127e+08	0.8385	93930750	1.1981
573	LDSLVAQQLQSK		0	1328.73	2	K	N	12	sp|Q9Y6R7|FCGBP_HUMAN	1051	1062	yes	9.8137e-29	196.27	18	-0.20767	A1;A10;A3;A4;A5;A6;A8;A9;B1;B2;B3;B4;B5;B7;B8	52058000	0	183230000	13742000	57503000	70128000	0	36648000	143530000	137030000	0	18329000	4195500	5949000	545170	0	109590000	16648000	0	0.379902	--	43.673	2.30997	105.477	--	--	2.20135	--	7.95484e+07	0.7672	4.17552e+07	1.3565
574	APETEEGAAELR		0	1271.6	2	K	L	12	sp|Q86VR7|VS10L_HUMAN	310	321	yes	9.8137e-29	196.27	26	-0.64668	A1;A10;A3;A4;A5;A6;A7;A8;B1;B10;B2;B3;B4;B6;B7;B8;B9	5638400	19517000	71547000	10041000	8341000	8712200	24598000	35051000	0	6026600	45393000	2201000	5317900	14201000	0	94831000	62971000	26646000	22389000	0.935586	0.429956	13.454	0.707063	--	0.0918708	0.390624	1.31543	--	22930700	0.9618	31108500	1.0032
575	YASQSISGVPSR		0	1250.63	2	K	F	12	sp|A0A0A0MT36|KVD21_HUMAN;sp|A0A0C4DH26|KVD41_HUMAN	69	80	yes	9.8137e-29	196.27	29	-0.4064	A1;A10;A3;A4;A5;A6;A7;A8;A9;B10;B2;B3;B4;B6;B7;B8;B9	15831000	23385000	42187000	10638000	17295000	118230000	33307000	9982600	248600000	0	246060000	6037700	12428000	10771000	0	213440000	0	14792000	16089000	--	0.0950378	3.39451	0.987652	--	0.553926	--	0.674865	15.4516	5.77173e+07	1.3697	74231100	1.4375
576	MLGQMTDQVADLR	M(ox)LGQMTDQVADLR	0	1476.71	2	K	A	13	sp|P18206|VINC_HUMAN	327	339	yes	9.8811e-29	203.94	8	-0.094687	A1;A10;A4;A5;A9;B2;B3;B4;B6	18289000	56791000	0	9574100	38359000	0	0	0	138570000	0	0	28851000	22587000	21850000	0	211490000	0	0	0	--	--	--	0.438174	--	--	--	--	--	52316620	0.9858	71194500	1.3145
577	AADDTWEPFASGK		0	1393.62	2	K	T	13	sp|P02766|TTHY_HUMAN	56	68	yes	9.8811e-29	203.94	27	-0.86163	A1;A10;A3;A4;A5;A6;A7;A8;A9;B1;B10;B2;B3;B4;B5;B6;B7;B8;B9	93770000	183320000	164750000	60576000	72622000	379650000	199340000	99217000	227130000	46631000	168220000	128870000	106880000	114320000	818020	303740000	141050000	140360000	221000000	2.01089	1.08976	1.54145	0.529881	88.7778	1.24992	1.41326	0.706875	1.02774	1.64486e+08	0.609	137188902	0.615
578	LVEWTSPGHMEER		0	1569.72	2;3	K	K	13	sp|Q9UIV8|SPB13_HUMAN	267	279	yes	9.8811e-29	203.94	23	-2.2957	A1;A10;A3;A4;A5;A7;A8;A9;B1;B2;B3;B4;B5;B6;B7	32759000	36455000	37820000	64461000	86644000	0	61461000	112480000	646300000	25191000	0	41442000	45780000	171390000	692240	74752000	79140000	0	0	1.30042	--	0.826125	0.376107	125.165	--	0.776611	--	--	134797500	1.5467	6.26267e+07	0.8799
579	DYFGAHTYELLAK		0	1526.74	2;3	R	P	13	sp|P52209|6PGD_HUMAN	448	460	yes	1.0076e-28	231.05	10	-0.0018368	A1;A4;A5;B1;B3;B4	38626000	0	0	52866000	53233000	0	0	0	0	0	0	0	11823000	25392000	0	0	0	0	0	--	--	--	2.08199	--	--	--	--	--	4.82417e+07	0.1727	18607500	0.5156
580	TLTNSLDREQASSYR	TLTN(de)SLDREQASSYR	1	1739.84	2;3	R	L	15	sp|P32926|DSG3_HUMAN	220	234	yes	1.0139e-28	204.13	72	-1.8882	A1;A10;A3;A4;A5;A6;A7;A8;A9;B10;B3;B4;B6;B7;B8;B9	26681000	184160000	431180000	65518000	15665000	138690000	379780000	331430000	288770000	0	343920000	0	2542400	28931000	0	260810000	733290000	123260000	207410000	--	0.535473	169.596	2.26463	--	0.531766	0.517912	2.68887	1.39227	2.06875e+08	0.7578	2.4288e+08	1.0226
581	SLGQNPTEAELR		0	1313.66	2	R	D	12	sp|P27482|CALL3_HUMAN	39	50	yes	1.0599e-28	195.36	51	-0.67044	A1;A10;A3;A4;A5;A6;A7;A8;A9;B1;B10;B2;B3;B4;B5;B6;B7;B8;B9	44056000	52160000	215460000	56137000	67677000	257400000	117870000	115690000	553530000	31201000	46991000	42461000	45773000	110300000	2546800	326450000	129290000	0	49569000	1.41201	1.11	4.70714	0.508948	26.5733	0.788482	0.911671	--	11.1669	1.64442e+08	0.9978	8.71758e+07	1.1225
582	GNFHAVYRDDLK	GN(de)FHAVYRDDLK	1	1433.71	2;3;4	K	K	12	sp|P05109|S10A8_HUMAN	24	35	yes	1.0666e-28	217.02	106	-0.70083	A1;A10;A3;A4;A5;A6;A7;A8;A9;B1;B10;B2;B3;B4;B5;B6;B7;B8;B9	503510000	296470000	289430000	244460000	1989300000	248810000	525660000	1339000000	464990000	83389000	912980000	42706000	504800000	417600000	16098000	1206300000	688460000	297090000	592450000	6.03809	0.324728	0.573356	0.585393	123.574	0.206259	0.76353	4.50705	0.784859	6.55737e+08	0.9213	476187300	0.8201
583	FWWENPGVFTNEQK	FWWENPGVFTN(de)EQK	0	1780.82	2	R	D	14	sp|P22079|PERL_HUMAN	645	658	yes	1.2288e-28	205.13	14	-0.88162	A1;A4;A5;B1;B2;B3;B4	130360000	0	0	343920000	197470000	0	0	0	0	242670000	0	157650000	164720000	143020000	0	0	0	0	0	0.53719	--	--	2.4047	--	--	--	--	--	2.23917e+08	0.4877	177015000	0.2525
584	EASDPQPEEADGGLK		0	1541.68	2	K	S	15	sp|P52907|CAZA1_HUMAN	104	118	yes	1.2297e-28	205.56	22	-0.19065	A1;A10;A3;A4;A5;A6;A7;A8;A9;B10;B2;B3;B4;B6;B7;B9	10245000	9823300	35912000	3717500	11419000	23448000	34955000	19455000	104150000	0	37770000	6778900	10897000	21876000	0	113020000	33929000	0	18986000	--	0.260082	3.29559	0.169935	--	0.207468	1.03024	--	5.48562	2.8125e+07	1.0896	3.4751e+07	1.0443
585	NQLTSNPENTVFDAK	N(de)QLTSNPENTVFDAK	0	1676.8	2	K	R	15	sp|P11021|BIP_HUMAN	82	96	yes	1.2853e-28	205.46	27	-0.54466	A1;A10;A3;A4;A5;A6;A7;A8;A9;B1;B10;B4;B5;B6;B7	14149000	12976000	60540000	18610000	22646000	40972000	57239000	56998000	223890000	13214000	30317000	0	0	39379000	969620	85414000	144070000	0	0	1.07076	0.428011	--	0.472587	23.3555	0.479687	0.3973	--	--	5.64467e+07	1.1642	52227270	1.0251
586	MFGIDRDAIAQAVR	M(ox)FGIDRDAIAQAVR	1	1561.8	2;3	K	G	14	sp|P29401|TKT_HUMAN	604	617	yes	1.4556e-28	194.7	41	-2.0546	A1;A10;A4;A5;A6;A7;A8;A9;B1;B10;B2;B3;B4;B6;B7;B8;B9	113950000	447330000	0	43040000	163430000	205030000	330820000	508390000	1386200000	12680000	350480000	132520000	230980000	73533000	0	1646800000	653100000	134670000	365610000	8.98659	1.27634	--	0.585315	--	0.124502	0.506538	3.77508	3.79147	399773750	1.0757	4.00041e+08	1.2652
587	THNQEAPSLQNIK		0	1478.75	2	K	C	13	sp|Q14CN2|CLCA4_HUMAN	254	266	yes	1.4846e-28	202.05	2	-0.14022	A4;A5;B4	0	0	0	9706200	2900800	0	0	0	0	0	0	0	0	0	0	0	0	0	0	--	--	--	--	--	--	--	--	--	6303500	0.7634	0	--
588	GQPREPQVYTLPPSRDELTK		2	2310.2	2;3;4	K	N	20	sp|P0DOX5|IGG1_HUMAN;sp|P01857|IGHG1_HUMAN	343	362	yes	1.5127e-28	157.85	334	-1.6993	A10;A3;A6;A7;A8;A9;B10;B6;B7;B8;B9	0	199940000	157920000	0	0	799770000	1586100000	330710000	926520000	0	1678100000	0	0	0	0	1935400000	116190000	258380000	211850000	--	0.119147	--	--	--	0.413232	13.6509	1.27994	4.37347	6.66827e+08	0.8269	839984000	1.058
589	YSSDYFQAPSDYR	YSSDYFQ(de)APSDYR	0	1597.67	2	K	Y	13	sp|Q08380|LG3BP_HUMAN	442	454	yes	1.6351e-28	201.48	67	-1.2594	A1;A10;A3;A4;A5;A6;A7;A8;A9;B1;B10;B2;B3;B4;B5;B6;B7;B8;B9	165560000	70632000	620840000	144230000	172440000	271830000	123680000	221540000	668920000	168710000	740520000	53198000	128690000	339720000	1414100	223570000	687650000	65276000	97418000	0.981329	0.0953816	4.82431	0.424556	121.943	1.21586	0.179859	3.3939	6.86649	2.73297e+08	0.7994	250616610	1.0474
590	SLIYAASSLQSGVPSR		0	1634.86	2	K	F	16	sp|P01601|KVD16_HUMAN	68	83	yes	1.7501e-28	200.93	1	-0.67756	B2;B3;B4	0	0	0	0	0	0	0	0	0	0	0	22607000	21474000	21716000	0	0	0	0	0	--	--	--	--	--	--	--	--	--	0	--	2.19323e+07	0.0272
591	HVFGESDELIGQK		0	1457.72	2;3	R	V	13	sp|P60174|TPIS_HUMAN	138	150	yes	1.7502e-28	240.1	79	-1.3288	A1;A10;A3;A4;A5;A6;A7;A8;A9;B1;B10;B2;B3;B4;B5;B6;B7;B8;B9	124710000	147550000	479140000	89972000	258590000	440280000	402840000	186470000	1981400000	25660000	372020000	171460000	203770000	233090000	4787300	1892200000	273940000	51540000	157690000	4.86009	0.396618	2.35138	0.385997	54.0158	0.232682	1.47054	3.61797	12.5652	4.56772e+08	1.2908	338615730	1.6474
592	QQNAQGGFSSTQDTVVALHALSK	QQN(de)AQGGFSSTQDTVVALHALSK;(gl)QQNAQGGFSSTQDTVVALHALSK	0	2386.19	2;3	K	Y	23	sp|P01023|A2MG_HUMAN	1241	1263	yes	1.7599e-28	216.19	55	-1.6633	A1;A10;A4;A5;A6;A7;A8;A9;B1;B10;B2;B3;B4;B6;B8;B9	218210000	287580000	0	71438000	263640000	587530000	931800000	117920000	176030000	14860000	238970000	397620000	310520000	220650000	0	457740000	0	489850000	516320000	14.6844	1.20341	--	0.323762	--	1.28355	--	0.240727	0.340932	331768500	0.8696	330816250	0.5123
593	SIQEIQELDKDDESLR		1	1916.93	2;3	K	K	16	sp|P52565|GDIR1_HUMAN	34	49	yes	1.8153e-28	234.82	14	-1.0788	A1;A10;A4;A7;A8;B10;B3;B4;B7;B8;B9	26040000	187050000	0	9739900	0	0	42202000	30256000	0	0	55438000	0	12443000	13191000	0	0	25323000	32342000	204690000	--	3.37404	--	0.738375	--	--	1.66655	0.935502	--	59057580	1.2274	5.72378e+07	1.2917
594	KSDIDEIVLVGGSTR		1	1587.85	2;3	K	I	15	sp|P11021|BIP_HUMAN	353	367	yes	1.876e-28	203.7	24	-1.0877	A1;A3;A4;A5;A6;A7;A8;A9;B3;B4;B5;B6;B7	32199000	0	125060000	44838000	51337000	113100000	82836000	62478000	238190000	0	0	0	26877000	53326000	472830	135280000	214540000	0	0	--	--	4.65305	0.840828	108.574	0.836044	0.38611	--	--	93754750	0.7132	86099166	1.0196
595	NQVAMNPTNTVFDAKR	NQVAM(ox)NPTNTVFDAKR	1	1804.89	2;3	K	L	16	sp|P11142|HSP7C_HUMAN	57	72	yes	1.9259e-28	198.57	25	-0.51206	A10;A6;A7;A8;A9;B10;B6;B7;B9	0	29825000	0	0	0	41047000	34916000	36908000	150400000	0	67599000	0	0	0	0	344550000	112690000	0	70867000	--	0.441205	--	--	--	0.119132	0.309841	--	2.12229	58619200	0.878	148926500	0.8865
596	LDSLQDIGMDHQALLK	LDSLQDIGM(ox)DHQALLK	0	1795.91	2;3	K	Q	16	sp|P80303|NUCB2_HUMAN	122	137	yes	2.1004e-28	240.59	55	-2.2832	A1;A10;A3;A4;A5;A6;A7;A8;A9;B1;B10;B2;B3;B4;B7;B8	193140000	243670000	97826000	611720000	173720000	82849000	51691000	426260000	236330000	295980000	290230000	35159000	148090000	104600000	0	0	1047900000	310020000	0	0.652544	0.839576	0.660585	5.84818	--	--	0.0493282	1.37494	--	2.35245e+08	0.7658	3.18854e+08	1.0624
597	TPGAAANLELIFVGPQHAGNYR		0	2295.18	3	R	C	22	sp|P04217|A1BG_HUMAN	448	469	yes	2.2054e-28	187.73	8	-0.47633	A1;A4;A5;A7;A9;B10;B2;B3;B6;B9	72362000	0	0	28161000	40997000	0	66327000	0	108830000	0	55241000	55142000	92014000	0	0	98834000	0	0	18248000	--	--	--	--	--	--	--	--	5.96394	63335400	0.4928	63895800	0.5099
598	YVMGNNPADLLAVDSR		0	1733.84	2	R	T	16	sp|Q02413|DSG1_HUMAN	423	438	yes	2.3597e-28	198.57	14	-0.29479	A1;A4;A5;B1;B2;B3;B4	50831000	0	0	114670000	57516000	0	0	0	0	27373000	0	117940000	89474000	177450000	0	0	0	0	0	1.85698	--	--	0.64621	--	--	--	--	--	74339000	0.472	103059250	0.6051
599	GAGTNEDALIEILTTR		0	1672.86	2;3	K	T	16	sp|P12429|ANXA3_HUMAN	105	120	yes	2.4254e-28	198.32	7	-0.062483	A1;A10;A4;A5;A6;A7;A9;B3	23186000	47279000	0	11037000	44716000	139940000	91805000	0	58668000	0	0	0	114500000	0	0	0	0	0	0	--	--	--	--	--	--	--	--	--	5.95187e+07	0.7372	114500000	--
600	LQSIGTENTEENR		0	1489.7	2	R	R	13	sp|P04075|ALDOA_HUMAN	44	56	yes	2.4846e-28	198.25	15	-0.94168	A10;A4;A5;A8;B1;B10;B2;B3;B4;B6;B7;B8;B9	0	20264000	0	7647900	9357000	0	0	28415000	0	1486300	18738000	3765300	6532400	13840000	0	6090200	35753000	13106000	30742000	--	1.08144	--	0.552594	--	--	--	2.16809	--	16420975	0.5941	1.44504e+07	0.8314
601	NILMQLYEANSEHAGYLNEK	NILMQLYEANSEHAGYLN(de)EK	0	2336.11	2;3	K	Q	20	sp|Q14515|SPRL1_HUMAN	533	552	yes	2.663e-28	189.1	8	-1.6462	A4;A5;B1;B2;B3	0	0	0	74840000	51837000	0	0	0	0	112050000	0	119590000	100040000	0	0	0	0	0	0	--	--	--	--	--	--	--	--	--	63338500	0.2568	110560000	0.0892
602	DLISHDEMFSDIYK		0	1711.78	2;3	R	I	14	sp|P13693|TCTP_HUMAN	6	19	yes	2.6641e-28	234.17	12	-1.1657	A1;A4;A5;A6;A7;A8;A9;B1;B2;B3;B4;B6;B9	79713000	0	0	74129000	240500000	468210000	1239700000	73398000	392680000	16120000	0	29499000	27320000	22849000	0	539920000	0	0	45373000	4.94498	--	--	3.2443	--	0.867184	--	--	8.65449	3.66904e+08	1.1364	113513500	1.8423
603	AVTEQGAELSNEER		0	1531.71	2	K	N	14	sp|P27348|1433T_HUMAN	28	41	yes	2.6662e-28	227.37	9	-0.92923	A4;A5;A6;A7;A8;A9;B4;B6;B7	0	0	0	4850900	5499500	17287000	17150000	19657000	47427000	0	0	0	0	4630900	0	56479000	23572000	0	0	--	--	--	1.04751	--	0.306078	0.727558	--	--	1.86452e+07	0.8297	28227300	0.9294
604	NEEDDMREMEEER	NEEDDMREM(ox)EEER	1	1710.65	2;3	K	L	13	sp|Q02818|NUCB1_HUMAN	281	293	yes	2.7177e-28	202.44	7	-0.92173	A3;A4;A5;B1;B2;B3;B4	0	0	44481000	8159900	7820000	0	0	0	0	32251000	0	11771000	10870000	40430000	0	0	0	0	0	--	--	4.09209	0.201828	--	--	--	--	--	2.01536e+07	1.0454	23830500	0.6223
605	LDASKHMWPGDIK		1	1496.74	2;3;4	R	A	13	sp|P19961|AMY2B_HUMAN;sp|P04746|AMYP_HUMAN	211	223	yes	2.7938e-28	202.29	100	-1.0018	A1;A10;A3;A4;A5;A6;A7;A8;A9;B1;B10;B2;B3;B4;B5;B6;B7;B8;B9	150440000	1231600000	550300000	204710000	95519000	338820000	1818000000	743950000	450780000	110700000	831260000	110690000	25716000	165190000	85581	474850000	1489700000	355510000	523890000	1.35899	1.48161	21.3991	1.23924	1116.12	0.713531	1.22038	2.09263	0.860448	6.20458e+08	0.9197	4.08759e+08	1.1294
606	GVQVETISPGDGR		0	1313.66	2	M	T	13	sp|P62942|FKB1A_HUMAN	2	14	yes	2.8441e-28	196.88	44	-0.88257	A1;A10;A3;A4;A5;A6;A7;A8;A9;B1;B10;B2;B3;B4;B5;B6;B7;B8;B9	125200000	62677000	101770000	56137000	65597000	95076000	86017000	80189000	712670000	31201000	85347000	110830000	54635000	112570000	2631900	604830000	95251000	13358000	67550000	4.01269	0.734378	1.86273	0.498685	24.9238	0.157195	0.903056	6.00307	10.5503	1.53926e+08	1.3684	117820390	1.4891
607	LVTLEEFLASTQR		0	1505.81	2;3	R	K	13	sp|Q02818|NUCB1_HUMAN	311	323	yes	2.8927e-28	242.49	24	-1.2225	A1;A3;A4;A5;A6;A7;A8;A9;B1;B10;B2;B3;B4;B6;B7;B9	51445000	0	147520000	111510000	94331000	141430000	114680000	110800000	79532000	52935000	203900000	49053000	76012000	70076000	0	103360000	193550000	0	20736000	0.971852	--	1.94075	1.59127	--	1.36832	0.592508	--	3.83546	106406000	0.2955	96202750	0.7029
608	LVAYYTLIGASGQR		0	1510.81	2;3	R	E	14	sp|P01024|CO3_HUMAN	531	544	yes	2.9749e-28	201.48	19	-0.20931	A1;A4;A5;B1;B10;B2;B3;B4;B5;B9	153360000	0	0	46717000	113470000	0	0	0	0	19337000	36805000	79752000	143930000	105430000	411040	0	0	0	40748000	7.93091	--	--	0.443109	276.056	--	--	--	--	1.04516e+08	0.5155	6.09161e+07	0.8372
609	TDGGTTDYAAPVK		0	1294.6	2	K	G	13	sp|A0A0B4J1V0|HV315_HUMAN	74	86	yes	3.0041e-28	196.27	48	-0.20783	A1;A10;A3;A4;A5;A6;A7;A8;A9;B1;B10;B2;B3;B4;B6;B7;B8;B9	55336000	53551000	98366000	18534000	32057000	47984000	74423000	69534000	68747000	9644200	103820000	8387500	30442000	75097000	0	119280000	134930000	8005300	8835500	5.73775	0.515806	3.23126	0.246801	--	0.40228	0.551567	8.686	7.78077	5.76147e+07	0.4118	5.53824e+07	0.9571
610	RDPTAEQFQEELEK		1	1718.81	2;3	K	F	14	sp|P31944|CASPE_HUMAN	54	67	yes	3.0201e-28	199.96	10	-0.86799	A5;A9;B6	0	0	0	0	38418000	0	0	0	268860000	0	0	0	0	0	0	187720000	0	0	0	--	--	--	--	--	--	--	--	--	153639000	1.0606	187720000	--
611	SQEQLAAELAEYTAK		0	1650.81	2;3	K	I	15	sp|P15311|EZRI_HUMAN	413	427	yes	3.117e-28	202.27	15	-2.1097	A1;A10;A4;A5;A6;A7;A8;A9;B1;B2;B3;B4;B7;B8	30530000	67446000	0	63217000	61062000	219480000	63122000	198930000	222560000	34310000	0	16637000	45043000	44196000	0	0	347170000	15717000	0	0.889828	--	--	1.43038	--	--	0.181819	12.657	--	115793375	0.7092	83845500	1.5462
612	ELSLAGNELGDEGAR		0	1529.73	2	K	L	15	sp|P13489|RINI_HUMAN	288	302	yes	3.5867e-28	201.46	4	-1.6157	A4;A5;A9;B3;B4	0	0	0	12367000	14067000	0	0	0	62920000	0	0	0	0	19281000	0	0	0	0	0	--	--	--	0.641409	--	--	--	--	--	2.97847e+07	0.9639	19281000	--
613	AGALNLDITGQLR	AGALN(de)LDITGQLR	0	1340.74	2;3	K	S	13	sp|Q8N4F0|BPIB2_HUMAN	274	286	yes	3.6471e-28	193.82	50	-1.6528	A1;A10;A3;A4;A5;A6;A7;A8;A9;B1;B10;B2;B3;B4;B5;B6;B7;B8;B9	451230000	1000400000	2932900000	649390000	732140000	2118900000	1842500000	854400000	2491200000	1609500000	1721100000	586410000	519250000	632510000	1189000	2208100000	2245800000	273600000	648500000	0.280354	0.581256	5.64834	1.02669	615.761	0.959603	0.82042	3.12281	3.84148	1.45256e+09	0.6251	1044595900	0.7861
614	DGVVEITGKHEERQDEHGYISR		2	2553.22	3;4	K	C	22	sp|P04792|HSPB1_HUMAN	115	136	yes	3.6789e-28	174.2	12	-0.78667	A3;A6;A7;A8;A9;B6;B8	0	0	54377000	0	0	95008000	125450000	70491000	182540000	0	0	0	0	0	0	222330000	0	18619000	0	--	--	--	--	--	0.427329	--	3.78597	--	105573200	0.4802	120474500	1.1957
615	SSFYVNGLTLGGQK	SSFYVN(de)GLTLGGQK	0	1469.75	2	R	C	14	sp|P07737|PROF1_HUMAN	57	70	yes	3.7049e-28	204.5	37	-0.81588	A1;A10;A4;A5;A6;A7;A8;A9;B1;B10;B2;B3;B4;B5;B6;B7;B8;B9	377440000	106560000	0	246900000	811260000	336630000	140870000	108020000	1413500000	101640000	217310000	341590000	781780000	498330000	2400300	704940000	171810000	45172000	280670000	3.7135	0.490359	--	0.495455	337.983	0.47753	0.819917	2.3913	5.03616	442647500	1.0276	314564230	0.8553
616	SGSGTMNLGGSLTR		0	1336.64	2	K	Q	14	sp|P47756|CAPZB_HUMAN	182	195	yes	3.7785e-28	199.8	22	-1.0335	A1;A3;A4;A5;A6;A7;A8;A9;B10;B2;B3;B4;B5;B6;B7	37716000	0	38893000	12771000	28837000	58826000	60768000	11870000	162460000	0	36606000	18905000	36760000	25660000	315000	104640000	55241000	0	0	--	--	1.05803	0.497701	91.546	0.562175	1.10005	--	--	51517625	0.9391	3.97324e+07	0.8384
617	NGVLVSVLGTTTMR	N(de)GVLVSVLGTTTMR;N(de)GVLVSVLGTTTM(ox)R	0	1446.79	2;3	K	V	14	sp|Q9HC84|MUC5B_HUMAN	5174	5187	yes	3.8378e-28	199.68	42	-1.6049	A1;A3;A4;A5;A6;A7;A8;B1;B10;B2;B3;B4	126110000	0	71347000	276010000	344370000	208840000	167970000	68755000	0	308260000	42725000	530320000	206890000	602990000	0	0	0	0	0	0.409103	--	0.344855	0.457736	--	--	--	--	--	180486000	0.5735	338237000	0.6814
618	NQVAMNPTNTVFDAK	NQVAM(ox)NPTNTVFDAK;NQVAM(ox)NPTN(de)TVFDAK;N(de)QVAMNPTNTVFDAK	0	1648.79	2	K	R	15	sp|P11142|HSP7C_HUMAN	57	71	yes	4.0436e-28	197.31	52	-2.2324	A1;A3;A4;A5;A6;A7;A8;A9;B10;B2;B3;B4;B5;B6;B7;B9	26754000	0	87425000	21564000	55792000	112350000	98008000	99027000	380400000	0	52733000	42364000	58146000	50059000	931550	252250000	91990000	0	32743000	--	--	1.50354	0.430772	59.8916	0.445391	1.06542	--	11.6178	110165000	1.0383	7.26521e+07	1.0585
619	THLAPYSDELRQR		1	1584.8	2;3;4	R	L	13	sp|P02647|APOA1_HUMAN	185	197	yes	4.0826e-28	241.4	18	-1.4401	A6;A7;B10;B6;B8;B9	0	0	0	0	0	127620000	59895000	0	0	0	39204000	0	0	0	0	82628000	0	353550000	98289000	--	--	--	--	--	1.54451	--	--	--	93757500	0.5108	143417750	0.9922
620	IIEGGIYDADLNDER	IIEGGIYDADLN(de)DER	0	1691.8	2;3	R	V	15	sp|P09228|CYTT_HUMAN	29	43	yes	4.2557e-28	220.23	112	-0.69623	A1;A10;A3;A4;A5;A6;A7;A8;A9;B1;B10;B2;B3;B4;B5;B6;B7;B8;B9	5891100000	1505900000	1021700000	1868600000	4269800000	1104900000	286850000	1324300000	6750500000	2600500000	689220000	276580000	687480000	222780000	35123000	1073200000	761320000	182000000	2052600000	2.26537	2.18493	1.48615	8.38765	121.567	1.02954	0.37678	7.27637	3.28876	2.66929e+09	0.881	858080300	0.9867
621	ILLANFLAQTEALMR	ILLAN(de)FLAQTEALMR	0	1702.94	2;3	K	G	15	sp|P06744|G6PI_HUMAN;CON__Q3ZBD7	424	438	yes	4.3314e-28	244.01	26	-0.73317	A1;A3;A4;A5;A6;A7;A8;A9;B1;B10;B2;B3;B4;B6	19543000	0	18352000	27258000	346560000	60064000	27777000	7778800	414980000	6105200	19909000	481750000	120350000	120760000	0	194330000	0	0	0	3.20104	--	0.152489	0.22572	--	0.309082	--	--	--	115289100	1.4361	157200700	1.1058
622	VEVERDNLAEDIMR	VEVERDNLAEDIM(ox)R	1	1687.82	2;3	R	L	14	sp|P08670|VIME_HUMAN	171	184	yes	4.3793e-28	235.73	38	-0.89818	A10;A6;A7;A8;A9;B1;B10;B2;B3;B4;B6	0	121180000	0	0	0	221890000	327180000	119890000	391920000	8661400	51626000	40639000	46611000	11656000	0	1021100000	0	0	0	--	2.34727	--	--	--	0.217305	--	--	--	236412000	0.5158	1.96716e+08	2.0551
623	TSESGELHGLTTEEEFVEGIYK		0	2454.14	3	K	V	22	sp|P02766|TTHY_HUMAN	69	90	yes	4.398e-28	181.87	5	-1.8458	A3;A4;A5;B10;B3;B4	0	0	49614000	80038000	79882000	0	0	0	0	0	50295000	0	202400000	101280000	0	0	0	0	0	--	--	0.245128	0.790265	--	--	--	--	--	6.98447e+07	0.2508	1.17992e+08	0.6561
624	KGTDVNVFNTILTTR		1	1677.9	2;3	R	S	15	sp|P04083|ANXA1_HUMAN	214	228	yes	4.4101e-28	198.29	11	-0.61152	A1;A4;A5;A6;A7;B1;B2;B3;B4;B7	20215000	0	0	21423000	22231000	106590000	130150000	0	0	50237000	0	16003000	74018000	31766000	0	0	85201000	0	0	0.402393	--	--	0.6744	--	--	1.52756	--	--	60121800	0.8953	51445000	0.5578
625	YVGGQEHFAHLLILR		0	1751.95	2;3;4	R	D	15	sp|P02763|A1AG1_HUMAN	109	123	yes	4.6067e-28	223.22	63	-3.0645	A1;A3;A4;A5;A6;A7;A8;A9;B1;B10;B2;B3;B4;B5;B6;B8;B9	685050000	0	137000000	259300000	475790000	1148900000	142830000	64473000	169420000	190400000	853180000	364060000	707860000	203270000	950370	388000000	0	49033000	1085000000	3.59795	--	0.193541	1.27564	500.637	2.96108	--	1.31489	0.156147	385345375	0.9645	4.26861e+08	0.8802
626	AQEAEKLLNNVISK	AQEAEKLLN(de)NVISK	1	1555.86	2;3	K	L	14	sp|Q96DR5|BPIA2_HUMAN	78	91	yes	4.7684e-28	225.13	28	-1.1018	A10;A3;A6;A7;A8;A9;B10;B6;B7;B8;B9	0	210950000	158050000	0	0	42724000	52412000	97815000	170760000	0	80894000	0	0	0	0	55744000	627800000	130710000	253150000	--	2.60773	--	--	--	0.766432	0.0834852	0.748336	0.674541	122118500	0.559	229659600	1.024
627	DVEDESTGLEKIEK		1	1590.76	2;3	K	Q	14	sp|P36952|SPB5_HUMAN	235	248	yes	5.1285e-28	206.36	11	-0.89695	A3;A6;A7;A8;A9;B6;B7	0	0	83679000	0	0	40625000	22098000	15135000	63821000	0	0	0	0	0	0	50188000	87842000	0	0	--	--	--	--	--	0.809456	0.251565	--	--	45071600	0.6359	69015000	0.3858
628	VGAHAGEYGAEALER		0	1528.73	2;3	K	M	15	sp|P69905|HBA_HUMAN	18	32	yes	5.3504e-28	234.79	111	-0.82871	A1;A10;A3;A4;A5;A6;A7;A8;A9;B1;B10;B3;B4;B5;B6;B7;B8;B9	650630000	283630000	1645900000	52151000	606950000	2484900000	6247200000	183070000	888290000	0	5535900000	0	568740000	242250000	69970000	4373000000	373700000	7410000000	8845100000	--	0.0512347	2.89394	0.215278	8.67443	0.568237	16.7172	0.0247058	0.100427	1.44919e+09	1.3519	3427332500	1.0431
629	GVALHRPDVYLLPPAR		1	1773.01	2;3;4	K	E	16	sp|P01871|IGHM_HUMAN;sp|P0DOX6|IGM_HUMAN	323	338	no	5.4617e-28	226.73	227	-1.087	A1;A10;A3;A4;A5;A6;A7;A8;A9;B1;B10;B2;B3;B4;B6;B7;B8;B9	1753400000	269490000	3063700000	704480000	1222700000	367910000	754060000	321940000	1925200000	1891400000	1087400000	392850000	1760900000	1614700000	0	356400000	1920600000	212960000	440160000	0.927038	0.24783	1.73985	0.436292	--	1.0323	0.392617	1.51174	4.37386	1.15365e+09	0.8143	1.07526e+09	0.6795
630	LHNLNSNWFPEGSK	LHNLN(de)SNWFPEGSK;LHNLN(de)SN(de)WFPEGSK	0	1641.79	2;3	K	P	14	sp|P04745|AMY1_HUMAN	229	242	yes	5.5105e-28	233.32	162	-1.3458	A1;A10;A3;A4;A5;A6;A7;A8;A9;B1;B10;B2;B3;B4;B5;B6;B7;B8;B9	1327500000	184090000	429190000	2421600000	1191100000	896630000	293090000	626810000	312540000	1988300000	67259000	1419500000	230930000	1886000000	9262000	42569000	125390000	83836000	397350000	0.667656	2.73703	1.85853	1.28399	128.601	21.063	2.33743	7.47662	0.786561	8.53617e+08	0.8372	625039600	1.2909
631	VKDLATVYVDVLK		1	1461.84	2;3	R	D	13	sp|P02647|APOA1_HUMAN	35	47	yes	5.8477e-28	196.38	59	-0.93865	A1;A10;A3;A4;A5;A6;A7;A8;A9;B1;B10;B2;B3;B4;B5;B6;B7;B8;B9	278500000	157910000	140470000	117290000	164630000	1754800000	1186900000	255160000	480690000	88122000	487260000	509240000	384570000	59319000	457270	1304200000	141160000	437750000	931680000	3.16039	0.324077	0.365265	1.97728	360.028	1.3455	8.40819	0.58289	0.515939	5.04039e+08	1.1442	434375827	0.9553
632	SLEEEKYDMSGAR	SLEEEKYDM(ox)SGAR	1	1513.67	2;3	R	L	13	sp|P31944|CASPE_HUMAN	6	18	yes	5.9883e-28	208.74	24	-0.70904	A10;A3;A5;A6;A7;A8;A9;B6;B7;B8;B9	0	9910400	88729000	0	7538100	39471000	43828000	10920000	504630000	0	0	0	0	0	0	462030000	19900000	9174500	16997000	--	--	--	--	--	0.0854295	2.20241	1.19026	29.6894	1.00718e+08	1.7912	127025375	1.7586
633	VAVNDAHLLQYNHR	VAVN(de)DAHLLQYNHR;VAVN(de)DAHLLQ(de)YNHR	0	1648.84	2;3;4	K	V	14	sp|P17931|LEG3_HUMAN	211	224	yes	6.1449e-28	213.38	35	-0.65229	A1;A3;A4;A5;A8;A9;B1;B2;B3;B4;B5;B6;B7	98216000	0	113980000	104300000	122090000	0	0	17350000	509460000	13810000	0	99334000	117390000	163400000	2025500	255200000	20608000	0	0	7.11195	--	0.970952	0.638311	60.2765	--	--	--	--	1.60899e+08	1.087	9.59668e+07	0.9666
634	NTGVISVVTTGLDR		0	1430.77	2	R	E	14	sp|P12830|CADH1_HUMAN	322	335	yes	6.3214e-28	194.48	12	0.27513	A1;A4;A5;B1;B2;B3;B4	16571000	0	0	19801000	18087000	0	0	0	0	18894000	0	29576000	24339000	78139000	0	0	0	0	0	0.877051	--	--	0.253407	--	--	--	--	--	18153000	0.089	37737000	0.723
635	EEVVTVETWQEGSLK		0	1732.85	2	K	A	15	sp|P09211|GSTP1_HUMAN	31	45	yes	6.5271e-28	240.85	5	-0.88218	A5;B2;B4	0	0	0	0	21489000	0	0	0	0	0	0	21564000	0	25582000	0	0	0	0	0	--	--	--	--	--	--	--	--	--	21489000	--	23573000	0.1205
636	IPLDMVAGFNTPLVK		0	1613.89	2;3	K	T	15	sp|Q8TDL5|BPIB1_HUMAN	112	126	yes	6.7063e-28	196.02	9	-2.9545	A4;A6;B1;B2;B3;B4	0	0	0	35640000	0	700830000	0	0	0	143030000	0	43814000	41037000	96169000	0	0	0	0	0	--	--	--	0.370598	--	--	--	--	--	368235000	1.2773	81012500	0.5987
637	TVSKVDDFLANEAK	TVSKVDDFLAN(de)EAK	1	1535.78	2;3	R	G	14	sp|P52209|6PGD_HUMAN	35	48	yes	7.8307e-28	202.61	67	-0.46174	A1;A10;A3;A4;A5;A6;A7;A8;A9;B10;B3;B4;B6;B7;B8;B9	26242000	139020000	420340000	17919000	56227000	88980000	409550000	278350000	1001300000	0	450780000	0	70682000	62850000	0	449190000	702050000	86014000	316690000	--	0.308399	5.94692	0.285107	--	0.19809	0.583363	3.2361	3.16177	2.70881e+08	1.1641	3.05465e+08	0.8034
638	FSTVAGESGSADTVR		0	1482.7	2	R	D	15	sp|P04040|CATA_HUMAN	113	127	yes	8.0208e-28	193.73	12	-0.83336	A1;A4;A5;A6;A9;B10;B2;B3;B4;B5;B6	19664000	0	0	5195200	17436000	45088000	0	0	81388000	0	0	12630000	13670000	21831000	610190	35235000	0	0	0	--	--	--	0.237974	28.5747	1.27964	--	--	--	33754240	0.8983	16795238	0.7616
639	QEVWLANGAAESR	QEVWLAN(de)GAAESR	0	1429.69	2	K	G	13	sp|O00584|RNT2_HUMAN	224	236	yes	8.4013e-28	194.48	4	-0.025185	A1;A10;A4;B7;B8;B9	12663000	28380000	0	16762000	0	0	0	0	0	0	0	0	0	0	0	0	142920000	17849000	41513000	--	--	--	--	--	--	--	--	--	1.92683e+07	0.4231	6.74273e+07	0.9854
640	IDSGLYLGSGYFTAIQNLR	IDSGLYLGSGYFTAIQ(de)NLR	0	2087.07	2;3	R	K	19	sp|P02788|TRFL_HUMAN	333	351	yes	1.0374e-27	206.32	26	-0.4101	A1;A3;A4;A5;A6;A9;B1;B2;B3;B4	281750000	0	36936000	535160000	501770000	421690000	0	0	66210000	146050000	0	137400000	1043500000	1191100000	0	0	0	0	0	1.92913	--	0.0353963	0.449299	--	--	--	--	--	3.07253e+08	0.7051	629512500	0.8999
641	FAHYVVTSQVVNTANEAR		0	2005	3	R	E	18	sp|P19827|ITIH1_HUMAN	66	83	yes	1.2628e-27	144.18	11	-1.1145	A1;A3;A5;A6;A7;B10;B6;B8;B9	21567000	0	0	0	14745000	50056000	88157000	0	0	0	71661000	0	0	0	0	72833000	0	0	68131000	--	--	--	--	--	0.687271	--	--	--	43631250	0.7653	70875000	0.0345
642	GLEWVANIKQDGSEK	GLEWVANIKQ(de)DGSEK	1	1672.84	2;3	K	Y	15	sp|P01780|HV307_HUMAN	63	77	yes	1.3728e-27	229.54	48	-0.63567	A1;A10;A3;A4;A5;A6;A7;A8;A9;B10;B2;B3;B4;B6;B7;B8;B9	22387000	24401000	213260000	12508000	20491000	207500000	119470000	67341000	220100000	0	179310000	22937000	41484000	65490000	0	71641000	45351000	25032000	22594000	--	0.136083	5.14078	0.190991	--	2.89639	2.63434	2.6902	9.74152	1.00829e+08	0.9006	59229875	0.8784
643	LQPLDFKENAEQSR	LQPLDFKEN(de)AEQSR	1	1673.84	2;3	K	A	14	sp|P01008|ANT3_HUMAN	202	215	yes	1.547e-27	168.22	45	-2.0922	A1;A10;A3;A4;A5;A6;A7;A8;A9;B10;B6;B7;B8;B9	6575500	37070000	0	8515700	15607000	246000000	334500000	58798000	174460000	0	145330000	0	0	0	0	636830000	176800000	340380000	407290000	--	0.255075	--	--	--	0.386288	1.89197	0.172742	0.428343	110190775	1.1423	341326000	0.5807
644	YAAVTQFEATDAR		0	1441.68	2	R	R	13	sp|P55786|PSA_HUMAN;sp|A6NEC2|PSAL_HUMAN	173	185	yes	1.7623e-27	164.43	14	-0.27026	A10;A4;A5;A6;A7;A8;B10;B3;B4;B6;B8;B9	0	13566000	0	11877000	15391000	0	32838000	36322000	0	0	22523000	0	0	27504000	0	84269000	0	6274000	21538000	--	0.602318	--	0.431828	--	--	--	5.78929	--	21998800	0.5281	32421600	0.9269
645	LNSDGSHSKGDGIPDRFSGSSSGAER	LN(de)SDGSHSKGDGIPDRFSGSSSGAER	2	2619.19	3;4	K	Y	26	sp|A0A075B6H9|LV469_HUMAN	70	95	yes	3.5149e-27	175.97	12	-0.38304	A10;A7;A8;A9;B10;B6;B7;B8	0	23516000	0	0	0	0	22917000	11322000	59163000	0	43032000	0	0	0	0	75906000	80942000	21343000	0	--	0.546477	--	--	--	--	0.283129	0.530478	--	29229500	0.7092	55305750	0.5099
646	RLLEQEFADVIVKPHDPATVDEVLR		2	2888.54	3;4	K	L	25	sp|Q9UBG3|CRNN_HUMAN	35	59	yes	5.2662e-27	176.44	13	-1.3242	A1;A3;A4;A5;A8;B1;B2;B3;B4	40265000	0	88523000	48365000	102390000	0	0	153610000	0	35617000	0	67716000	43355000	65130000	0	0	0	0	0	1.1305	--	2.04182	0.742592	--	--	--	--	--	86630600	0.5275	52954500	0.3003
647	AAEAAAAPAESAAPAAGEEPSKEEGEPK		1	2635.22	3	K	K	28	sp|P80723|BASP1_HUMAN	122	149	yes	5.8826e-27	157.95	42	-0.68012	A1;A10;A3;A4;A5;A6;A7;A8;A9;B10;B3;B4;B6;B7;B8;B9	51837000	74538000	57711000	10507000	16656000	79235000	174190000	31095000	36666000	0	99768000	0	14659000	30688000	0	79157000	44432000	16620000	72375000	--	0.747113	3.9369	0.342381	--	1.00099	3.92037	1.87094	0.506611	5.91594e+07	0.8323	5.10999e+07	0.6484
648	WSGPLSLQEVDEQPQHPLHVTYAGAAVDELGK		0	3470.71	3;4	K	V	32	sp|P30086|PEBP1_HUMAN	8	39	yes	1.3864e-26	150.04	28	-0.64105	A10;A3;A4;A5;A6;A7;A8;A9;B1;B2;B3;B4;B6;B7;B9	0	150610000	289350000	198070000	263850000	218190000	74684000	368510000	315310000	18222000	0	317470000	279580000	263950000	0	365100000	207330000	0	141000000	--	--	1.03495	0.750407	--	0.597617	0.360218	--	2.23624	234821750	0.4025	2.27522e+08	0.5162
649	DMMSEIDRDGNGTVDFPEFLGMMAR	DMMSEIDRDGN(de)GTVDFPEFLGMMAR	1	2833.22	3	R	K	25	sp|P27482|CALL3_HUMAN	51	75	yes	1.6156e-26	171.72	7	-0.75302	A3;A4;A5;A8;A9;B1;B2;B3;B4;B6	0	0	58084000	45782000	31760000	0	0	10643000	40466000	29504000	0	47621000	20882000	46411000	0	70164000	0	0	0	--	--	2.78153	0.986447	--	--	--	--	--	37347000	0.4743	42916400	0.4424
650	TYVVTGNMGSNDKVGDFVATDLDTGRPSTTVR	TYVVTGNMGSN(de)DKVGDFVATDLDTGRPSTTVR;TYVVTGN(de)MGSN(de)DKVGDFVATDLDTGRPSTTVR	2	3372.63	3;4	K	Y	32	sp|Q02413|DSG1_HUMAN	391	422	yes	2.1783e-26	150.26	13	-0.22686	A1;A4;A8;A9;B2;B3;B4;B7	13357000	0	0	25475000	0	0	0	117890000	301890000	0	0	24633000	19511000	49211000	0	0	136210000	0	0	--	--	--	0.517669	--	--	--	--	--	114653000	1.1624	57391250	0.943
651	SEFPESWLWNVEDLKEPPKNGISTK	SEFPESWLWNVEDLKEPPKN(de)GISTK	2	2929.45	4	R	L	25	sp|P01024|CO3_HUMAN	765	789	yes	2.5717e-26	171.15	4	-0.24351	A1;A4;A5;B2;B3;B4	38341000	0	0	15413000	54995000	0	0	0	0	0	0	45651000	65217000	49383000	0	0	0	0	0	--	--	--	0.312111	--	--	--	--	--	3.62497e+07	0.5482	53417000	0.1945
652	DVSLAKADAAPDEKVLDSGFR		2	2203.11	3;4	R	E	21	sp|P01833|PIGR_HUMAN	572	592	yes	3.8976e-26	193.4	9	-2.3393	A10;A8;B10;B7;B8	0	149160000	0	0	0	0	0	42916000	0	0	56853000	0	0	0	0	0	361690000	167250000	0	--	2.62361	--	--	--	--	--	0.256598	--	96038000	0.7823	1.95264e+08	0.7904
653	DVNDWVGPPNDNGVTK	DVNDWVGPPNDN(de)GVTK;DVN(de)DWVGPPNDN(de)GVTK;DVN(de)DWVGPPN(de)DN(de)GVTK	0	1725.8	2;3	K	E	16	sp|P04745|AMY1_HUMAN	368	383	yes	6.6243e-26	185.9	387	-3.878	A1;A10;A3;A4;A5;A6;A7;A8;A9;B1;B10;B2;B3;B4;B5;B6;B7;B8;B9	1500900000	1943600000	1501900000	2317200000	1195400000	1717400000	1484000000	2275100000	1912200000	2021900000	1039400000	1720800000	271320000	1837300000	15349000	582630000	1079900000	535860000	2347700000	0.742322	1.86992	5.53553	1.2612	77.8813	2.94767	1.3742	4.2457	0.814499	1.76086e+09	0.2165	1145215900	0.6991
654	AAQVTIQSSGTFSSK		0	1510.76	2	K	F	15	sp|P01023|A2MG_HUMAN	1275	1289	yes	1.4901e-25	224.82	57	-0.48552	A1;A10;A3;A4;A5;A6;A7;A8;A9;B10;B2;B3;B4;B5;B6;B8;B9	94484000	65995000	69024000	32817000	34238000	204330000	136440000	0	191980000	0	130920000	31239000	25055000	72895000	640960	147630000	0	98475000	48360000	--	0.504086	2.7549	0.450195	53.4167	1.38407	--	--	3.96981	103663500	0.6476	69401870	0.7577
655	VHVSEEGTEPEAMLQVLGPK		0	2149.07	3	R	P	20	sp|P06396|GELS_HUMAN	258	277	yes	1.6972e-25	150.28	4	-0.32616	A1;A4;A5;B1;B2;B3	15621000	0	0	16684000	29829000	0	0	0	0	15667000	0	31469000	29336000	0	0	0	0	0	0	0.997064	--	--	--	--	--	--	--	--	2.07113e+07	0.3821	2.54907e+07	0.3364
656	LMEWTSLQNMR	LMEWTSLQN(de)MR	0	1407.66	2	K	E	11	sp|P29508|SPB3_HUMAN;sp|P48594|SPB4_HUMAN	266	276	no	5.8919e-25	226.04	16	-1.9745	A1;A10;A3;A4;A5;A6;A8;A9;B1;B2;B3;B4;B6;B7	37359000	53044000	77690000	25356000	81917000	66302000	0	85737000	183040000	22447000	0	31950000	42071000	85043000	0	186710000	139030000	0	0	1.66432	--	1.84664	0.298155	--	0.355107	--	--	--	76305625	0.6318	8.45418e+07	0.7816
657	LVNHFVEEFKR	LVN(de)HFVEEFKR	1	1416.75	2;3;4	R	K	11	sp|P0DMV9|HS71B_HUMAN;sp|P0DMV8|HS71A_HUMAN	237	247	yes	7.1465e-25	188.04	120	-3.7961	A1;A10;A3;A4;A5;A6;A7;A8;A9;B1;B10;B2;B3;B4;B5;B6;B7;B8;B9	159280000	209310000	290100000	102300000	234850000	340000000	115410000	364630000	2122300000	18963000	159750000	186380000	331610000	216090000	2634000	1330200000	341460000	29684000	105150000	8.39951	1.31023	0.874823	0.473414	89.161	0.255601	0.33799	12.2837	20.1835	4.37576e+08	1.4592	272192100	1.4357
658	LYGSEAFATDFQDSAAAKK		1	2018.96	3	R	L	19	sp|P01011|AACT_HUMAN	160	178	yes	8.7462e-25	148.15	4	-0.2253	A8;B10;B8;B9	0	0	0	0	0	0	0	35505000	0	0	77155000	0	0	0	0	0	0	92750000	118430000	--	--	--	--	--	--	--	0.382803	--	35505000	--	9.61117e+07	0.2169
659	HPDEAAFFDTASTGK		0	1592.71	2;3	R	T	15	sp|P02671|FIBA_HUMAN	513	527	yes	9.1504e-25	145.81	2	-0.9151	B8;B9	0	0	0	0	0	0	0	0	0	0	0	0	0	0	0	0	0	11721000	20068000	--	--	--	--	--	--	--	--	--	0	--	15894500	0.3713
660	AQGPAASAEEPKPVEAPAANSDQTVTVKE	AQGPAASAEEPKPVEAPAAN(de)SDQTVTVKE	2	2891.41	3	K	-	29	sp|P80723|BASP1_HUMAN	199	227	yes	1.2435e-24	145.29	7	-0.32431	A10;B10;B9	0	69684000	0	0	0	0	0	0	0	0	21783000	0	0	0	0	0	0	0	49770000	--	3.19901	--	--	--	--	--	--	--	69684000	--	35776500	0.5532
661	KLISVDTEHSNIYLQNGPDR	KLISVDTEHSNIYLQN(de)GPDR	1	2298.16	3;4	K	I	20	sp|P00450|CERU_HUMAN	43	62	yes	1.5473e-24	188.86	8	-0.63089	A1;A10;A5;A6;A7;A8;B7	50060000	29927000	0	0	20137000	59856000	39622000	38925000	0	0	0	0	0	0	0	0	30987000	0	0	--	--	--	--	--	--	1.27867	--	--	39754500	0.3544	30987000	--
662	SFFTDDDKQDHLSWEWNLSIK		1	2610.2	3;4	K	K	21	sp|P52566|GDIR2_HUMAN	176	196	yes	1.569e-24	181.26	8	-0.97041	A1;A4;A5;B2;B3;B4	104110000	0	0	19987000	84081000	0	0	0	0	0	0	164780000	109710000	36691000	0	0	0	0	0	--	--	--	0.544738	--	--	--	--	--	6.93927e+07	0.6333	103727000	0.6195
663	HNVYINGITYTPVSSTNEKDMYSFLEDMGLK	HNVYIN(de)GITYTPVSSTNEKDMYSFLEDMGLK	1	3565.67	4	R	A	31	sp|P01023|A2MG_HUMAN	646	676	yes	1.7696e-24	149.57	1	-0.86314	B2;B3;B4	0	0	0	0	0	0	0	0	0	0	0	62143000	25297000	22891000	0	0	0	0	0	--	--	--	--	--	--	--	--	--	0	--	36777000	0.5982
664	TLVVHEKADDLGKGGNEESTK	TLVVHEKADDLGKGGN(de)EESTK	2	2226.11	3;4;5	R	T	21	sp|P00441|SODC_HUMAN	117	137	yes	2.1489e-24	153.77	8	-0.55481	A10;A8;B6;B7;B8;B9	0	11136000	0	0	0	0	0	5816300	0	0	0	0	0	0	0	17241000	8394900	4072800	9303300	--	--	--	--	--	--	--	1.42808	--	8476150	0.4438	9753000	0.5628
665	FQSLNADINKR	FQSLNADIN(de)KR;FQSLN(de)ADIN(de)KR	1	1304.68	2;3	R	G	11	sp|P30740|ILEU_HUMAN	70	80	yes	2.3057e-24	193.1	131	-4.421	A1;A10;A3;A4;A5;A6;A7;A8;A9;B1;B10;B2;B3;B4;B5;B6;B7;B8;B9	71776000	543020000	408860000	152660000	162440000	535720000	1437800000	960390000	1471800000	45971000	585320000	241920000	257380000	199130000	13642000	2580200000	983250000	70801000	338260000	1.56133	0.927732	1.58855	0.766635	11.9073	0.207627	1.46229	13.5646	4.35109	638274000	0.8388	531587400	1.4608
666	AVIHPDYDAASHDQDIMLLR		0	2279.1	3;4	R	L	20	sp|Q92876|KLK6_HUMAN	92	111	yes	2.5863e-24	185.13	15	-0.56418	A1;A3;A4;A5;A9;B1;B10;B2;B3;B4;B8;B9	16423000	0	99881000	40547000	27268000	0	0	0	220390000	44345000	297030000	35779000	48984000	200390000	0	0	0	57206000	120430000	0.370346	--	2.03905	0.20234	--	--	--	--	1.83003	80901800	1.043	1.14881e+08	0.8663
667	KYAYWYQQK		1	1276.62	2;3	K	S	9	sp|A0A075B6K4|LV310_HUMAN	49	57	no	3.4171e-24	195.6	3	-1.0675	A5;B3	0	0	0	0	37555000	0	0	0	0	0	0	0	21770000	0	0	0	0	0	0	--	--	--	--	--	--	--	--	--	37555000	--	21770000	--
668	TLTGKEIEIDIEPTDKVER		2	2185.15	3	K	I	19	sp|Q15843|NEDD8_HUMAN	7	25	yes	4.0927e-24	189.51	3	-0.173	A8;A9;B6	0	0	0	0	0	0	0	35351000	119860000	0	0	0	0	0	0	53545000	0	0	0	--	--	--	--	--	--	--	--	--	77605500	0.77	53545000	--
669	VIISAPSADAPMFVMGVNHEK	VIISAPSADAPMFVM(ox)GVNHEK;VIISAPSADAPMFVMGVN(de)HEK	0	2212.1	2;3	R	Y	21	sp|P04406|G3P_HUMAN	119	139	yes	4.5684e-24	222.56	43	-2.1027	A1;A4;A5;A9;B1;B2;B3;B4;B5	734830000	0	0	642570000	1156600000	0	0	0	716030000	204850000	0	76500000	495900000	802010000	336150	0	0	0	0	3.58716	--	--	0.801199	3440.73	--	--	--	--	812507500	0.2865	315919230	1.0474
670	VPISLSIDRLEFDLLYPAIK		1	2301.3	2;3	K	G	20	sp|Q8TDL5|BPIB1_HUMAN	221	240	yes	4.8155e-24	157.85	11	-0.32662	A1;A4;A5;A6;B1;B2;B3;B4	55155000	0	0	113350000	54640000	111790000	0	0	0	275310000	0	414540000	205240000	336620000	0	0	0	0	0	0.200338	--	--	0.33673	--	--	--	--	--	83733750	0.3977	307927500	0.2892
671	QIRNMVNFR	QIRN(de)MVNFR;QIRN(de)MVN(de)FR;Q(de)IRNM(ox)VNFR	1	1176.62	2;3	R	N	9	sp|P04745|AMY1_HUMAN;sp|P19961|AMY2B_HUMAN	405	413	no	5.08e-24	202.2	108	-3.8436	A1;A10;A3;A4;A5;A6;A7;A8;A9;B1;B10;B2;B3;B4;B5;B6;B7;B8;B9	150330000	674960000	54601000	179350000	76989000	100370000	562280000	238800000	195780000	58851000	301750000	102480000	25664000	86351000	1264900	136690000	677710000	110470000	443070000	2.55442	2.23682	2.12753	2.07699	60.8657	0.734289	0.829676	2.16167	0.441871	2.48162e+08	0.8858	194430090	1.1132
672	DYPVVSIEDPFDQDDWGAWQK		0	2509.11	2;3	K	F	21	sp|P06733|ENOA_HUMAN	286	306	yes	6.6267e-24	220.21	11	-1.0416	A1;A4;A5;B2;B3;B4	44413000	0	0	41358000	86152000	0	0	0	0	0	0	58480000	74424000	94270000	0	0	0	0	0	--	--	--	0.438719	--	--	--	--	--	5.73077e+07	0.4367	7.57247e+07	0.2368
673	WNTEDKVSHVSTGGGASLELLEGK		1	2513.24	3;4	K	V	24	sp|P00558|PGK1_HUMAN;sp|P07205|PGK2_HUMAN	383	406	yes	7.1007e-24	142.32	6	-0.52066	A3;A8;A9;B9	0	0	66387000	0	0	0	0	254700000	347020000	0	0	0	0	0	0	0	0	0	125550000	--	--	--	--	--	--	--	--	2.764	2.22702e+08	0.6422	125550000	--
674	TASYYSPYGQR		0	1291.58	2	K	E	11	sp|Q8WWA0|ITLN1_HUMAN;sp|Q8WWU7|ITLN2_HUMAN	219	229	yes	9.4898e-24	191.85	5	-0.18496	A4;A6	0	0	0	11725000	0	140540000	0	0	0	0	0	0	0	0	0	0	0	0	0	--	--	--	--	--	--	--	--	--	76132500	1.1964	0	--
675	EMEENFAVEAANYQDTIGR		0	2185.96	2;3	R	L	19	sp|P08670|VIME_HUMAN	346	364	yes	1.0195e-23	135.08	3	0.93062	B2;B3;B6	0	0	0	0	0	0	0	0	0	0	0	30859000	12835000	0	0	0	0	0	0	--	--	--	--	--	--	--	--	--	0	--	21847000	0.5834
676	EYGAWKQQVESK		1	1451.7	2;3	R	N	12	sp|Q05315|LEG10_HUMAN	68	79	yes	1.0959e-23	168.69	10	-0.86393	A10;A7;A8;B10;B6;B7;B9	0	35700000	0	0	0	0	52768000	18229000	0	0	11183000	0	0	0	0	26125000	35192000	0	38673000	--	3.19235	--	--	--	--	1.49943	--	--	3.55657e+07	0.4856	27793250	0.4415
677	VASESVSLELPVDIVPDSTK		0	2084.09	2	K	A	20	sp|A8K2U0|A2ML1_HUMAN	924	943	yes	1.3852e-23	186.05	5	-0.24234	A1;A4;A5;B2;B3;B4	32251000	0	0	50078000	69104000	0	0	0	0	0	0	61120000	71759000	117400000	0	0	0	0	0	--	--	--	0.426559	--	--	--	--	--	5.04777e+07	0.3651	8.34263e+07	0.3584
678	AALTRDPQFQK	(ac)AALTRDPQFQK	1	1273.68	2	M	L	11	sp|P06744|G6PI_HUMAN	2	12	yes	1.4279e-23	181.87	30	-0.28386	A10;A3;A6;A7;A8;A9;B10;B6;B7;B8;B9	0	145720000	52855000	0	0	55181000	80969000	132310000	436600000	0	150100000	0	0	0	0	842220000	209000000	31874000	82896000	--	0.970819	--	--	--	0.0655185	0.387411	4.15103	5.26684	1.50606e+08	0.9652	263218000	1.2557
679	ATYFGSIVLLSPAVIDSPLK		0	2090.17	2	R	L	20	sp|P55058|PLTP_HUMAN	305	324	yes	1.767e-23	183.96	2	0.15354	A4;A5;B1;B2	0	0	0	19710000	19670000	0	0	0	0	30437000	0	12843000	0	0	0	0	0	0	0	--	--	--	--	--	--	--	--	--	19690000	0.0014	21640000	0.5749
680	KLTDPTGWVTIDENTGSIK		1	2074.06	2;3	K	V	19	sp|Q02487|DSC2_HUMAN	510	528	yes	2.3752e-23	184.48	11	-2.0025	A1;A4;A5;B1;B2;B3;B4;B6	15435000	0	0	88045000	33343000	0	0	0	0	21633000	0	53466000	43292000	86308000	0	56064000	0	0	0	0.713493	--	--	1.02013	--	--	--	--	--	4.56077e+07	0.8294	52152600	0.449
681	GISQEQMNEFR		0	1337.6	2	K	A	11	sp|P12814|ACTN1_HUMAN	742	752	yes	2.3932e-23	189.13	9	-0.60628	A1;A4;A5;A9;B2;B3;B4;B5;B6	20922000	0	0	5880900	17113000	0	0	0	0	0	0	6813200	20992000	10198000	676220	48932000	0	0	0	--	--	--	0.576672	25.3069	--	--	--	--	1.46386e+07	0.5342	17522284	1.0869
682	SDTSLTWNSVK	SDTSLTWN(de)SVK	0	1236.6	2	R	G	11	sp|P02788|TRFL_HUMAN	463	473	yes	2.6449e-23	188.66	88	-1.1796	A1;A10;A3;A4;A5;A6;A7;A8;A9;B1;B10;B2;B3;B4;B5;B7;B8;B9	182020000	319670000	1127600000	246120000	353780000	9429500000	227880000	665560000	1251000000	94468000	1167600000	72540000	564720000	842860000	6097800	0	2493700000	17636000	88973000	1.92679	0.273784	1.99674	0.292006	58.0176	--	0.0913823	37.7387	14.0604	1.53368e+09	1.9479	5.94288e+08	1.3895
683	KLQATVQELQK		1	1284.74	2;3	R	R	11	sp|P31146|COR1A_HUMAN	439	449	yes	2.9821e-23	202.03	26	-0.46239	A1;A10;A4;A5;A8;A9;B1;B2;B3;B4;B5;B6;B8;B9	22672000	133800000	0	33229000	46293000	0	0	81259000	2069200	11552000	0	100790000	155360000	78091000	494390	8021700	0	63274000	132970000	1.9626	--	--	0.425516	93.6366	--	--	1.28424	0.0155614	5.32204e+07	0.8923	6.88191e+07	0.8577
684	LSQEDPDYGIR		0	1291.6	2	R	D	11	sp|P04040|CATA_HUMAN	253	263	yes	3.1851e-23	187.64	23	0.56321	A1;A3;A5;A6;A7;A9;B2;B3;B4;B5;B6	49716000	0	0	0	41100000	67978000	0	0	209730000	0	0	38826000	50666000	54512000	1154000	0	0	0	0	--	--	--	--	35.6153	--	--	--	--	92131000	0.8596	36289500	0.6712
685	THLAPYSDELR		0	1300.64	2;3	R	Q	11	sp|P02647|APOA1_HUMAN	185	195	yes	3.6421e-23	186.78	117	-0.82393	A1;A10;A3;A4;A5;A6;A7;A8;A9;B1;B10;B2;B3;B4;B6;B7;B8;B9	548910000	569330000	912420000	118150000	291590000	3454200000	3824300000	471660000	1092100000	75878000	1598800000	597080000	286410000	159390000	0	2298800000	394650000	2050400000	3007900000	7.23411	0.356098	3.18571	0.741264	--	1.50261	9.69036	0.230033	0.363077	1.25363e+09	1.1062	1.16326e+09	0.9387
686	NALESYAFNMK	N(de)ALESYAFNMK	0	1286.6	2	K	S	11	sp|P0DMV9|HS71B_HUMAN;sp|P0DMV8|HS71A_HUMAN	540	550	no	3.9274e-23	186.25	22	-1.4823	A1;A10;A3;A4;A5;A7;A8;A9;B1;B10;B2;B3;B4;B6;B7;B9	23476000	113630000	66845000	38084000	49127000	0	0	176660000	299400000	16489000	70906000	35489000	46365000	9737400	0	357490000	208550000	0	43278000	1.42374	1.60254	1.44171	3.91111	--	--	--	--	6.91806	1.09603e+08	0.9013	98538050	1.2387
687	NGQVWEESLKR	N(de)GQVWEESLKR	1	1344.68	2;3	R	L	11	sp|P22079|PERL_HUMAN	87	97	yes	3.9586e-23	182.65	99	-0.88415	A1;A10;A3;A4;A6;A7;A8;A9;B1;B10;B7;B8;B9	51270000	46303000	180540000	136810000	0	247610000	14348000	34218000	145750000	252590000	473600000	0	0	0	0	0	1126800000	175600000	328960000	0.202977	0.0977682	--	--	--	--	0.0127334	0.194863	0.443063	107106125	0.7751	471510000	0.8112
688	VTTMDAELEFAIQPNTTGK		0	2065	2	R	Q	19	sp|P26038|MOES_HUMAN;sp|P35241|RADI_HUMAN;sp|P15311|EZRI_HUMAN	9	27	no	4.0544e-23	233.59	4	1.0061	A1;A4;A5;B3;B4	18044000	0	0	14832000	35386000	0	0	0	0	0	0	0	29600000	23666000	0	0	0	0	0	--	--	--	0.626722	--	--	--	--	--	22754000	0.4859	26633000	0.1575
689	DSTLIMQLLR		0	1188.65	2	K	D	10	sp|P63104|1433Z_HUMAN;sp|P31946|1433B_HUMAN;sp|P31947|1433S_HUMAN;sp|P62258|1433E_HUMAN;sp|P61981|1433G_HUMAN;sp|P27348|1433T_HUMAN;sp|Q04917|1433F_HUMAN	213	222	no	4.2773e-23	192.6	8	-0.64802	A1;A4;A5;A9;B1;B2;B3;B4	79018000	0	0	140950000	164410000	0	0	0	110930000	42524000	0	90313000	106200000	178570000	0	0	0	0	0	1.8582	--	--	0.789326	--	--	--	--	--	123827000	0.2991	104401750	0.5399
690	TDKTLVLLMGK	TDKTLVLLM(ox)GK	1	1217.71	2;3	K	E	11	sp|P07737|PROF1_HUMAN	106	116	yes	4.7039e-23	216.45	74	-0.63714	A1;A10;A3;A4;A5;A6;A7;A8;A9;B10;B2;B3;B4;B6;B7;B8;B9	37668000	157400000	247750000	22829000	100500000	428580000	93139000	236830000	2705800000	0	259560000	54980000	237610000	73472000	0	1023600000	107480000	15684000	99127000	--	0.606411	1.04267	0.310717	--	0.418699	0.866571	15.1001	27.2963	4.47833e+08	1.9116	233939125	1.412
691	GIGTDEFTLNR		0	1221.6	2	K	I	11	sp|P12429|ANXA3_HUMAN	264	274	yes	5.3105e-23	183.65	29	-0.42639	A1;A10;A4;A5;A6;A7;A8;A9;B1;B2;B3;B6;B7;B9	26454000	29892000	0	17594000	29830000	266250000	81846000	37078000	209330000	0	0	19572000	96916000	0	0	130350000	22832000	0	20010000	--	--	--	--	--	2.04258	3.58471	--	10.4613	87284250	1.1008	57936000	0.9013
692	FTDEEVDELYR		0	1414.63	2	R	E	11	sp|P19105|ML12A_HUMAN;sp|O14950|ML12B_HUMAN	133	143	yes	5.4251e-23	183.43	2	0.32377	A9;B3	0	0	0	0	0	0	0	0	33282000	0	0	0	48068000	0	0	0	0	0	0	--	--	--	--	--	--	--	--	--	33282000	--	48068000	--
693	VEILANDQGNR		0	1227.62	2	R	T	11	sp|P17066|HSP76_HUMAN;sp|P48741|HSP77_HUMAN	28	38	yes	5.7799e-23	182.76	30	-3.3052	A1;A10;A3;A4;A5;A6;A7;A8;A9;B10;B2;B3;B4;B6;B7;B8;B9	8175900	85688000	31586000	64067000	90240000	0	0	194080000	22523000	0	108550000	66671000	104920000	101240000	0	55246000	244800000	37027000	104690000	--	0.789387	0.301048	0.632823	--	--	--	5.24158	0.21514	7.09086e+07	0.8851	102893000	0.6158
694	DHGQPGYNSWR	DHGQPGYN(de)SWR	0	1315.57	2;3	R	A	11	sp|P22079|PERL_HUMAN	560	570	yes	7.1915e-23	188.04	103	-0.71691	A1;A10;A3;A4;A5;A6;A7;A8;B1;B10;B2;B3;B4;B5;B6;B7;B8;B9	19057000	99358000	55944000	196610000	224300000	0	0	72316000	0	270110000	65911000	132020000	88370000	321820000	4063800	33921000	163320000	127780000	26604000	0.0705527	1.50746	0.633066	0.610932	55.1946	--	--	0.565941	--	1.11264e+08	0.7333	123391980	0.8488
695	TPAQFDADELR		0	1261.59	2	K	A	11	sp|P04083|ANXA1_HUMAN	114	124	yes	7.3537e-23	179.8	23	-0.404	A1;A10;A3;A4;A5;A6;A7;A8;A9;B1;B2;B3;B4;B5;B7;B8;B9	114810000	75767000	138770000	98711000	106970000	783520000	665890000	166550000	840190000	160000000	0	57533000	308560000	141940000	23928000	0	633990000	16566000	66033000	0.717562	--	0.449734	0.695442	4.47049	--	1.05032	10.0537	12.7238	3.32353e+08	0.9843	176068750	1.1825
696	LVDKFLEDVKK		2	1332.77	2;3;4	K	L	11	sp|P01009|A1AT_HUMAN	150	160	yes	7.8091e-23	185.77	180	-0.52936	A1;A10;A3;A4;A5;A6;A7;A8;A9;B1;B10;B2;B3;B4;B6;B7;B8;B9	166510000	870630000	1356700000	69388000	242960000	1498200000	2323800000	863890000	2016900000	48447000	2241600000	184230000	420630000	162270000	0	1770200000	728640000	1646400000	2068300000	3.43695	0.388397	3.2254	0.427608	--	0.846345	3.18923	0.524715	0.975149	1045442000	0.7795	1.03008e+09	0.8661
697	TWDHFWLNEGHTVYLER		0	2202.03	3;4	K	H	17	sp|P09960|LKHA4_HUMAN	311	327	yes	8.4181e-23	193.18	17	-1.539	A1;A4;A5;B2;B3;B4	42920000	0	0	24175000	66465000	0	0	0	0	0	0	22555000	63343000	68313000	0	0	0	0	0	--	--	--	0.353886	--	--	--	--	--	44520000	0.476	5.14037e+07	0.4884
698	GITGVEDKESWHGKPLPK		2	1977.03	2;3;4;5	R	N	18	sp|P29401|TKT_HUMAN	247	264	yes	1.5601e-22	202.92	157	-0.70857	A1;A10;A3;A4;A5;A6;A7;A8;A9;B1;B10;B2;B3;B4;B5;B6;B7;B8;B9	371200000	635510000	348440000	192720000	275530000	582610000	568010000	553470000	2407300000	35305000	592840000	267460000	225770000	179580000	1381800	2245700000	871950000	64285000	500560000	10.5141	1.07198	1.54334	1.07317	199.399	0.259434	0.651425	8.60963	4.80921	6.59421e+08	1.021	498483180	1.3508
699	ISNVFTFAFR	ISN(de)VFTFAFR	0	1200.63	2	R	F	10	sp|P22079|PERL_HUMAN	456	465	yes	1.6295e-22	189.7	22	-1.0149	A1;A3;A4;A5;A9;B1;B2;B3;B4;B7	110190000	0	17237000	188370000	152420000	0	0	0	24492000	156520000	0	114640000	159130000	154100000	0	0	21163000	0	0	0.703999	--	0.10832	1.22239	--	--	--	--	--	98541800	0.7729	121110600	0.4853
700	SSGSLLNNAIK	SSGSLLNN(de)AIK;SSGSLLN(de)N(de)AIK	0	1102.6	2	R	G	11	sp|P01023|A2MG_HUMAN;sp|P20742|PZP_HUMAN	1082	1092	yes	1.6968e-22	180.44	53	-3.4091	A1;A10;A3;A4;A5;A6;A7;A8;A9;B1;B10;B2;B3;B4;B5;B6;B8;B9	95005000	15159000	0	52185000	84999000	260360000	329060000	28143000	144780000	6714900	35416000	156170000	172790000	124850000	3752800	259100000	0	145700000	166590000	14.1484	0.428027	--	0.417982	22.6495	1.00486	--	0.193157	0.86908	126211375	0.8964	119009300	0.7264
701	NTVYLQMNSLR	NTVYLQMN(de)SLR	0	1337.68	2	R	A	11	sp|P0DOX2|IGA2_HUMAN	76	86	yes	1.7782e-22	179.8	50	-1.5508	A1;A3;A4;A5;A6;A7;A9;B1;B10;B2;B3;B4;B5;B6	107980000	0	153950000	102920000	113580000	172720000	32696000	0	322360000	81321000	26724000	39120000	187360000	206970000	1544800	59023000	0	0	0	1.32782	--	0.82168	0.49727	73.5241	2.92632	--	--	--	1.43744e+08	0.6289	8.6009e+07	0.9314
702	KFGDPVVQSDMK	KFGDPVVQSDM(ox)K	1	1349.66	2;3	R	H	12	sp|P0DMV9|HS71B_HUMAN;sp|P0DMV8|HS71A_HUMAN	77	88	yes	1.9042e-22	191.53	31	-0.748	A1;A10;A3;A4;A5;A6;A7;A8;A9;B2;B3;B4;B6;B7	23146000	43338000	65867000	0	32663000	67479000	35209000	64691000	402100000	0	0	52096000	79053000	95701000	0	283110000	115980000	0	0	--	--	0.833201	--	--	0.238349	0.303578	--	--	91811625	1.378	125188000	0.7295
703	LTATIFNYLK		0	1182.66	2	R	D	10	sp|A8K2U0|A2ML1_HUMAN	808	817	yes	2.0197e-22	188.76	6	-0.52318	A1;A4;A5;B2;B3;B4	38020000	0	0	45084000	75988000	0	0	0	0	0	0	44826000	50765000	106170000	0	0	0	0	0	--	--	--	0.42464	--	--	--	--	--	5.30307e+07	0.3808	6.72537e+07	0.5031
704	ISGLIYEETR		0	1179.61	2	R	G	10	sp|P62805|H4_HUMAN	47	56	yes	2.0617e-22	188.66	30	-0.099628	A1;A4;A5;A6;A7;A8;A9;B1;B2;B3;B4;B5;B6	17617000	0	0	6667700	0	540890000	161490000	15045000	93701000	271690000	0	99640000	135630000	71313000	8090800	0	0	0	0	0.0648423	--	--	0.0934991	--	--	--	--	--	1.39235e+08	1.4778	117272760	0.8368
705	LSELVQAVSDPSSPQYGK		0	1903.95	2	R	Y	18	sp|O14773|TPP1_HUMAN	61	78	yes	2.4502e-22	193	12	-1.5854	A1;A3;A4;A5;A6;A7;B1;B10;B3;B4;B6;B7	27295000	0	50811000	21654000	18924000	23289000	21971000	0	0	26526000	53863000	0	19696000	26328000	0	108760000	133130000	0	0	1.02899	--	2.57976	0.82247	--	0.214132	0.165034	--	--	27324000	0.4328	6.13838e+07	0.7857
706	TNQELQEINR	TN(de)QELQEINR	0	1243.62	2	R	V	10	sp|P07355|ANXA2_HUMAN;sp|A6NMY6|AXA2L_HUMAN	136	145	yes	3.6251e-22	190.02	8	-1.0565	A10;A6;A8;B1;B3;B4;B5;B8	0	4147700	0	0	0	17518000	0	11904000	0	12332000	0	0	10347000	10023000	1774200	0	0	5472900	0	--	--	--	--	--	--	--	2.17508	--	11189900	0.6	7989820	0.5366
707	VLEQHKLNKDQWEER	VLEQHKLN(de)KDQWEER	2	1950.99	2;3;4;5	R	I	15	sp|P26038|MOES_HUMAN	157	171	yes	3.983e-22	193.47	35	-0.52755	A10;A3;A6;A7;A8;A9;B10;B6;B7;B8;B9	0	89603000	60600000	0	0	15657000	234770000	127720000	38552000	0	219760000	0	0	0	0	424380000	327110000	36838000	110220000	--	0.407731	--	--	--	0.0368938	0.71771	3.46707	0.349773	9.44837e+07	0.8374	223661600	0.7026
708	LASDLLEWIR		0	1214.67	2	K	R	10	sp|O43707|ACTN4_HUMAN;sp|P12814|ACTN1_HUMAN	301	310	no	4.1395e-22	183.65	15	-0.44168	A1;A10;A3;A4;A5;A6;A7;A9;B1;B10;B2;B3;B4;B6;B7	58253000	12418000	37452000	46412000	86976000	69993000	76572000	0	140300000	23643000	25888000	71951000	127130000	55160000	0	219020000	23855000	0	0	2.46386	0.479682	0.294596	0.841407	--	0.319574	3.20989	--	--	66047000	0.5785	7.80924e+07	0.9273
709	ILLNPQDK		0	939.539	1;2	R	D	8	sp|P01833|PIGR_HUMAN	297	304	yes	4.3616e-22	199.07	61	-0.57248	A1;A10;A3;A4;A5;A6;A7;A8;A9;B1;B10;B2;B3;B4;B5;B6;B7;B8;B9	282090000	232000000	527110000	3041700000	1746600000	125940000	43527000	479110000	30648000	1496500000	783180000	1359300000	1589500000	2732200000	19957000	75533000	803800000	202430000	162570000	0.1885	0.296228	0.33162	1.11328	87.5182	1.66735	0.0541515	2.36679	0.188522	7.23192e+08	1.4046	922497000	0.9493
710	NEDSLVFVQTDKSIYKPGQTVK		2	2495.29	3	K	F	22	sp|P01023|A2MG_HUMAN	124	145	yes	4.4429e-22	179.03	5	-0.36702	A7;A8;B10;B6;B8;B9	0	0	0	0	0	0	49084000	12746000	0	0	31944000	0	0	0	0	126360000	0	55512000	147550000	--	--	--	--	--	--	--	0.229608	--	30915000	0.8311	90341500	0.6128
711	LTDPNSAFSR	LTDPN(de)SAFSR	0	1106.54	2	R	C	10	sp|Q9HC84|MUC5B_HUMAN	625	634	yes	4.5109e-22	189.13	323	-2.5015	A1;A10;A3;A4;A5;A6;A7;A8;A9;B1;B10;B2;B3;B4;B5;B6;B7;B8;B9	1464400000	2122600000	17987000000	2719100000	2842500000	7684900000	10008000000	2502800000	16796000000	2812000000	7381300000	2314900000	1262500000	5003500000	51684000	19321000000	9803100000	2668900000	2359700000	0.520768	0.287565	14.2471	0.54344	54.9977	0.397749	1.0209	0.937765	7.11785	7.12526e+09	0.91	5297858400	1.0821
712	VGDTLNLNLR		0	1113.61	2	R	A	10	sp|P0C0L4|CO4A_HUMAN;sp|P0C0L5|CO4B_HUMAN	485	494	no	4.6621e-22	182.39	5	-0.5628	A3;A6;A9;B4;B5	0	0	57731000	0	0	85648000	0	0	132560000	0	0	0	0	40196000	2243800	0	0	0	0	--	--	--	--	--	--	--	--	--	9.19797e+07	0.4111	21219900	1.2647
713	AVLTIDEK		0	887.496	1;2	K	G	8	sp|P01009|A1AT_HUMAN	360	367	yes	4.8657e-22	198.07	49	-0.3571	A1;A10;A3;A4;A5;A6;A7;A8;A9;B1;B10;B2;B3;B4;B5;B6;B7;B8;B9	52882000	247090000	144340000	158020000	309120000	122580000	116370000	571780000	114250000	50517000	712390000	238120000	508580000	268580000	7766500	176540000	245820000	765480000	913770000	1.04682	0.346847	0.28381	0.588354	39.8017	0.694347	0.473395	0.746956	0.125031	204048000	0.773	388756350	0.8129
714	NIILEEGKEILVGDVGQTVDDPYATFVK		1	3061.59	3	K	M	28	sp|P23528|COF1_HUMAN	46	73	yes	4.9344e-22	144.49	11	0.02126	A1;A4;A5;A8;A9;B1;B10;B3;B4;B6;B7;B9	59814000	0	0	104680000	130880000	0	0	109530000	172010000	52168000	58672000	0	107480000	82436000	0	105670000	141430000	0	27332000	1.14656	--	--	1.26983	--	--	--	--	6.29336	115382800	0.3543	8.21697e+07	0.4756
715	ESEAVEWQQK		0	1232.57	2	K	A	10	sp|P26038|MOES_HUMAN	439	448	yes	5.291e-22	180.87	15	-1.8478	A1;A10;A4;A5;A8;B1;B2;B3;B4;B7;B8;B9	3946400	73043000	0	9992300	68809000	0	0	68105000	0	10979000	0	5226400	66874000	21279000	0	0	26359000	25984000	71553000	0.35945	--	--	0.469585	--	--	--	2.62104	--	44779140	0.7734	3.26078e+07	0.8036
716	IQELEEPEER		0	1270.6	2	K	H	10	sp|O00748|EST2_HUMAN	546	555	yes	5.3198e-22	180.8	8	-1.7881	A1;A10;A4;A5;A8;A9;B1;B2;B3;B4;B7	9300100	7097500	0	11110000	12039000	0	0	40116000	128780000	5409600	0	6134900	10169000	13834000	0	0	41640000	0	0	1.71918	--	--	0.803094	--	--	--	--	--	3.47404e+07	1.3719	15437500	0.9738
717	ELVALMSAIR		0	1101.62	2	K	D	10	sp|P09960|LKHA4_HUMAN	166	175	yes	5.4698e-22	180.44	12	-0.91051	A1;A4;A5;B2;B3;B4;B5	115750000	0	0	70210000	147560000	0	0	0	0	0	0	192090000	74539000	140160000	2654800	0	0	0	0	--	--	--	0.500928	55.5823	--	--	--	--	1.11173e+08	0.3497	102360950	0.8016
718	DSGFQMNQLR	DSGFQMN(de)QLR;DSGFQM(ox)NQLR;DSGFQM(ox)N(de)QLR	0	1194.55	2	K	G	10	sp|P02787|TRFE_HUMAN	123	132	yes	5.4698e-22	194.27	104	-4.4444	A1;A10;A3;A4;A5;A6;A7;A8;A9;B1;B10;B2;B3;B4;B5;B6;B7;B8;B9	137020000	163950000	349450000	56480000	121060000	1408000000	939570000	172530000	1122500000	29940000	65491000	322240000	228540000	160060000	6123400	3274500000	154810000	798710000	1170800000	4.57649	2.5034	1.52905	0.352868	19.7701	0.429989	6.06918	0.216011	0.958746	4.96729e+08	1.0363	621121440	1.6175
719	SLAELGGHLDQQVEEFRR		1	2083.04	3;4	K	R	18	sp|P06727|APOA4_HUMAN	288	305	yes	5.9752e-22	185.26	3	-0.43613	B8;B9	0	0	0	0	0	0	0	0	0	0	0	0	0	0	0	0	0	134350000	529540000	--	--	--	--	--	--	--	--	--	0	--	331945000	0.8418
720	GHFSISIPVKSDIAPVAR		1	1893.05	2;3;4	K	L	18	sp|P01023|A2MG_HUMAN	522	539	yes	6.7521e-22	156.81	13	-1.0447	A6;A7;A9;B10;B6;B8;B9	0	0	0	0	0	65496000	162190000	0	294650000	0	170170000	0	0	0	0	846330000	0	79435000	197560000	--	--	--	--	--	0.0773883	--	--	1.49145	174112000	0.6607	323373750	1.0894
721	DGSFSVVITGLR		0	1249.67	2;3	K	K	12	sp|P01833|PIGR_HUMAN	305	316	yes	7.6415e-22	192.26	85	-0.79075	A1;A3;A4;A5;A6;A8;A9;B1;B10;B2;B3;B4;B5;B7	1008000000	0	70524000	1006800000	869890000	39214000	0	60092000	87237000	1253000000	21648000	864340000	805600000	1130100000	2149700	0	56773000	0	0	0.804469	--	0.0875422	0.890895	404.656	--	--	--	--	4.48822e+08	1.074	5.90516e+08	0.9291
722	TEGDGVYTLNNEKQWINK		1	2108.02	2;3	R	A	18	sp|P00738|HPT_HUMAN	119	136	yes	7.8146e-22	226.73	25	-2.5205	A10;A3;A6;A7;A8;B10;B6;B7;B8;B9	0	20127000	49529000	0	0	68606000	310060000	95438000	0	0	295810000	0	0	0	0	230960000	64386000	24127000	185810000	--	0.0680403	--	--	--	0.297047	4.81564	3.95565	--	108752000	1.0652	160218600	0.7099
723	AATSDLEHYDKTRHEEFK		2	2176.02	3;4;5;6	K	K	18	sp|P80303|NUCB2_HUMAN	161	178	yes	8.068e-22	186.94	59	-0.75549	A10;A3;A6;A7;A8;A9;B10;B6;B7;B8	0	179810000	282000000	0	0	150860000	321810000	310790000	116880000	0	392840000	0	0	0	0	167820000	1076700000	235290000	0	--	0.457718	--	--	--	0.898939	0.298885	1.32088	--	227025000	0.3899	468162500	0.8897
724	DLLFKDSAIGFSR		1	1467.77	2;3	K	V	13	sp|P02788|TRFL_HUMAN	316	328	yes	8.4754e-22	176.42	24	-0.46699	A1;A10;A3;A4;A5;A6;A7;A8;A9;B10;B3;B4;B6;B7;B9	11886000	114660000	284350000	5874100	7317000	2981700000	155530000	335390000	170590000	0	411350000	0	33236000	11843000	0	70760000	948220000	0	125950000	--	0.278741	8.55548	0.495998	--	42.1382	0.164023	--	1.35443	451921900	2.1155	2.66893e+08	1.3644
725	VILHLKEDQTEYLEER		1	2014.04	3;4	K	R	16	sp|P07900|HS90A_HUMAN;sp|Q58FF6|H90B4_HUMAN;sp|P08238|HS90B_HUMAN;sp|Q58FF7|H90B3_HUMAN	186	201	no	1.1011e-21	192.4	12	-0.398	A1;A10;A4;A5;A7;A9;B3;B6;B7	39133000	3092900	0	9269700	35292000	0	30420000	0	105030000	0	0	0	12888000	0	0	99864000	21212000	0	0	--	--	--	--	--	--	1.43409	--	--	37039600	0.9807	4.46547e+07	1.0748
726	LSLLEEPGNGTFTVILNQLTSR	LSLLEEPGN(de)GTFTVILNQLTSR	0	2401.29	2;3	R	D	22	sp|P01833|PIGR_HUMAN	413	434	yes	1.2479e-21	177.08	8	0.31327	A1;A4;A5;B1;B2;B3;B4	10535000	0	0	39074000	43181000	0	0	0	0	15728000	0	97711000	44252000	46841000	0	0	0	0	0	0.669825	--	--	0.834184	--	--	--	--	--	30930000	0.5749	51133000	0.6669
727	AYTAVEGDEVSLLEGEAVEVIHK		0	2457.23	3	K	L	23	sp|A8MVU1|NCF1C_HUMAN;sp|P14598|NCF1_HUMAN;sp|A6NI72|NCF1B_HUMAN	212	234	yes	1.3639e-21	140.64	2	0.148	A5;B2;B3	0	0	0	0	38495000	0	0	0	0	0	0	26578000	40174000	0	0	0	0	0	0	--	--	--	--	--	--	--	--	--	38495000	--	33376000	0.288
728	QKPDGVFQEDAPVIHQEMIGGLR	(gl)QKPDGVFQEDAPVIHQEMIGGLR	1	2563.29	3;4	K	N	23	sp|P01024|CO3_HUMAN	1112	1134	yes	1.4087e-21	174.47	26	-1.171	A1;A4;A5;B1;B2;B3;B4	156340000	0	0	70857000	143370000	0	0	0	0	23184000	0	107950000	201430000	122410000	0	0	0	0	0	6.74344	--	--	0.57885	--	--	--	--	--	1.23522e+08	0.373	113743500	0.642
729	LSITGTYDLK		0	1109.6	1;2	K	S	10	sp|P01009|A1AT_HUMAN	315	324	yes	1.4566e-21	182.4	107	-0.28286	A1;A10;A3;A4;A5;A6;A7;A8;A9;B1;B10;B2;B3;B4;B5;B6;B7;B8;B9	288060000	367040000	419670000	104220000	554380000	796810000	1862400000	888770000	1415400000	150570000	1250800000	568790000	792580000	211970000	4842400	1542900000	371970000	1451700000	1854900000	1.91313	0.293444	0.529499	0.491673	114.485	0.516437	5.00686	0.612227	0.76306	7.44083e+08	0.77	820102240	0.8053
730	GYSFTTTAER		0	1131.52	1;2	R	E	10	sp|P63261|ACTG_HUMAN;sp|P60709|ACTB_HUMAN	197	206	yes	1.4705e-21	182.29	114	-0.5312	A1;A10;A3;A4;A5;A6;A7;A8;A9;B1;B10;B2;B3;B4;B5;B6;B7;B8;B9	892910000	868460000	2736300000	639290000	1491800000	4810400000	2496300000	1639000000	5055500000	280310000	2684200000	464550000	2015400000	1311400000	54106000	5132000000	1725900000	297750000	2248300000	3.18544	0.323545	1.3577	0.487487	27.5718	0.937334	1.44638	5.50462	2.24859	2.29222e+09	0.7235	1621391600	0.9522
731	NVTELNEPLSNEER		0	1642.78	2	K	N	14	sp|P61981|1433G_HUMAN	29	42	yes	1.4977e-21	218.01	8	-0.15919	A6;A7;A8;B10;B6;B7;B9	0	0	0	0	0	0	48916000	20594000	0	0	42240000	0	0	0	0	107090000	18818000	0	25006000	--	--	--	--	--	--	2.59943	--	--	34755000	0.5762	48288500	0.8373
732	VLVENEHRGSQTVSYTR	VLVEN(de)EHRGSQTVSYTR	1	1973.99	3;4	R	A	17	sp|Q9Y6R7|FCGBP_HUMAN	905	921	yes	1.6484e-21	184.99	33	0.020427	A10;A3;A6;A7;A8;B10;B6;B7;B8	0	20909000	76825000	0	0	21336000	30236000	22319000	0	0	27120000	0	0	0	0	34858000	299640000	36030000	0	--	0.770981	--	--	--	0.612083	0.100908	0.619456	--	34325000	0.701	99412000	1.3433
733	LTVGAAQVPAQLLVGALR		0	1776.06	2	R	V	18	sp|P08571|CD14_HUMAN	94	111	yes	1.7387e-21	189.13	5	-0.86513	A1;A4;A5;B1;B2;B3;B4	14804000	0	0	19054000	34154000	0	0	0	0	16730000	0	17104000	16581000	28804000	0	0	0	0	0	0.884877	--	--	0.661505	--	--	--	--	--	2.26707e+07	0.4486	19804750	0.3031
734	FSGSGSGTDFTLK		0	1302.61	2	R	I	13	sp|P01615|KVD28_HUMAN;sp|A0A075B6P5|KV228_HUMAN;sp|P01614|KVD40_HUMAN;sp|A0A087WW87|KV240_HUMAN;sp|P06310|KV230_HUMAN	87	99	no	2.1526e-21	192.38	119	-0.70423	A1;A10;A3;A4;A5;A6;A7;A8;A9;B1;B10;B2;B3;B4;B5;B6;B7;B8;B9	2449100000	725880000	2418700000	1274800000	1636600000	1801000000	1394300000	952400000	7757300000	753060000	1545600000	722530000	1532400000	2504500000	44303000	3172300000	1203600000	234720000	318660000	3.2522	0.469643	1.57837	0.509004	36.9411	0.567727	1.15844	4.0576	24.3435	2.26779e+09	0.944	1203167300	0.8446
735	SYDIAQDAPDGLAVLAAFVEVK		0	2291.17	2;3;4	K	N	22	sp|P23280|CAH6_HUMAN	148	169	yes	2.1927e-21	224.55	341	-2.5886	A1;A10;A3;A4;A5;A6;A7;A8;A9;B1;B10;B2;B3;B4;B5;B6;B7;B9	790670000	48371000	897030000	3156100000	3750400000	901720000	156350000	99414000	1956000000	5165300000	168470000	5187500000	1633900000	1895100000	2277200	667100000	616400000	0	15467000	0.153073	0.287119	0.549012	1.6654	1646.93	1.3517	0.25365	--	126.463	1.30623e+09	1.0404	1705723800	1.2178
736	LDLRDDKDTIEK		2	1459.75	2;3;4	K	L	12	sp|P15153|RAC2_HUMAN	117	128	no	2.2179e-21	160.38	64	-0.17016	A1;A10;A3;A4;A5;A6;A7;A8;A9;B1;B10;B2;B3;B4;B5;B6;B7;B9	71136000	27994000	151710000	40591000	89366000	215750000	178240000	103370000	386420000	8065900	144820000	10263000	117810000	41369000	3967000	197580000	108260000	0	81711000	8.81935	0.193302	1.28775	0.981194	22.5274	1.09196	1.64641	--	4.72911	1.40509e+08	0.7922	7.93162e+07	0.8639
737	GNWGHLDQVAALR		0	1435.73	3	R	W	13	sp|P23141|EST1_HUMAN	187	199	yes	2.2361e-21	154.36	5	0.08722	A3;A6;A7;A8;A9;B6	0	0	19232000	0	0	20445000	18794000	26863000	48702000	0	0	0	0	0	0	26201000	0	0	0	--	--	--	--	--	0.780314	--	--	--	26807200	0.4724	26201000	--
738	ELSDFISYLQR		0	1369.69	2	R	E	11	sp|P30101|PDIA3_HUMAN	472	482	yes	2.4545e-21	169.12	1	NAN	A5	0	0	0	0	0	0	0	0	0	0	0	0	0	0	0	0	0	0	0	--	--	--	--	--	--	--	--	--	0	--	0	--
739	IQSSHNFQLESVNK		0	1629.81	2;3	K	L	14	sp|Q8NBJ4|GOLM1_HUMAN	84	97	yes	2.5228e-21	158.25	15	-0.94724	A1;A3;A4;A5;A6;A7;A9;B10;B7	14397000	0	58323000	24835000	22618000	143940000	75516000	0	27259000	0	32908000	0	0	0	0	0	82777000	0	0	--	--	--	--	--	--	0.912282	--	--	5.24126e+07	0.8768	57842500	0.6096
740	LDKAQIHDLVLVGGSTR		1	1821.01	2;3;4	K	I	17	sp|P0DMV9|HS71B_HUMAN;sp|P0DMV8|HS71A_HUMAN	326	342	yes	2.6888e-21	223.96	52	-1.0713	A10;A3;A5;A6;A7;A8;A9;B10;B2;B3;B4;B6;B7;B9	0	117950000	43521000	0	19134000	100770000	39853000	183500000	798340000	0	49558000	11349000	26342000	16936000	0	505730000	153560000	0	35037000	--	2.38004	1.65215	--	--	0.199257	0.259527	--	22.7856	1.86153e+08	1.4815	1.14073e+08	1.5724
741	HQFLLTGDTQGR		0	1371.69	2;3	K	Y	12	sp|P04217|A1BG_HUMAN	79	90	yes	2.8691e-21	188.49	51	-1.1252	A1;A10;A3;A4;A5;A6;A7;A8;A9;B1;B10;B2;B3;B4;B5;B6;B7;B8;B9	119610000	122040000	193090000	40384000	84919000	334470000	791720000	133570000	538450000	17968000	494720000	78592000	75443000	72522000	1101400	935640000	74310000	171820000	249050000	6.65683	0.246685	2.55942	0.556852	77.101	0.357477	10.6543	0.777383	2.16202	2.62028e+08	0.9578	217116640	1.3413
742	TFTTQETITNAETAKEWFLQAAK		1	2628.31	3	K	D	23	sp|P06744|G6PI_HUMAN	212	234	yes	3.2844e-21	169.84	5	-1.2498	A5;A9;B2;B3;B4	0	0	0	0	76608000	0	0	0	68562000	0	0	104050000	84048000	35692000	0	0	0	0	0	--	--	--	--	--	--	--	--	--	72585000	0.0784	7.45967e+07	0.4711
743	VGWEQLLTTIAR		0	1385.77	2	R	T	12	sp|O43707|ACTN4_HUMAN;sp|P12814|ACTN1_HUMAN	734	745	no	3.3885e-21	187.55	14	-2.57	A1;A10;A3;A4;A5;A7;A8;A9;B1;B2;B3;B4;B6;B7	54091000	36733000	84640000	32085000	107740000	0	0	19468000	235110000	27142000	0	71951000	121380000	58932000	0	365550000	0	0	0	1.99289	--	0.697314	0.544441	--	--	--	--	--	8.14096e+07	0.9156	128991000	1.0584
744	NLDIERPTYTNLNR		1	1717.87	2;3	R	L	14	sp|Q9BQE3|TBA1C_HUMAN;sp|Q71U36|TBA1A_HUMAN;sp|P68363|TBA1B_HUMAN;sp|P0DPH8|TBA3D_HUMAN;sp|P0DPH7|TBA3C_HUMAN;sp|Q6PEY2|TBA3E_HUMAN;sp|Q9NY65|TBA8_HUMAN	216	229	no	3.4514e-21	164.11	21	-1.9399	A1;A3;A4;A5;A6;A7;A8;A9;B10;B3;B4;B9	29143000	0	51728000	15819000	29157000	143910000	77065000	35533000	117920000	0	106440000	0	30303000	29630000	0	0	0	0	22955000	--	--	1.70703	0.533885	--	--	--	--	5.13701	62534375	0.7441	47332000	0.8355
745	ERQEAEEAKEALLQASR		2	1956.99	3;4	K	D	17	sp|P26038|MOES_HUMAN	392	408	yes	3.4859e-21	179.92	32	-1.1445	A1;A10;A3;A5;A6;A7;A8;A9;B10;B3;B6;B7;B8;B9	10519000	94153000	65796000	0	15498000	39221000	119480000	72485000	326450000	0	134820000	0	0	0	0	272960000	198110000	57346000	252390000	--	0.698361	--	--	--	0.143688	0.603099	1.26399	1.29343	92950250	1.0916	183125200	0.4826
746	LVHVEEPHTETVR		0	1544.79	2;3;4	R	K	13	sp|P01023|A2MG_HUMAN	720	732	yes	3.6809e-21	190.86	219	-0.49522	A1;A10;A3;A4;A5;A6;A7;A8;A9;B1;B10;B2;B3;B4;B5;B6;B7;B8;B9	266910000	531200000	549240000	130760000	199350000	856620000	2785800000	354970000	23276000	20239000	1573200000	263180000	262390000	182170000	4880300	1184600000	144810000	1677800000	2263800000	13.1879	0.337656	2.09322	0.717791	40.8479	0.72313	19.2376	0.211569	0.0102818	6.33125e+08	1.3362	757706930	1.1015
747	SKLPGIVAEGRDDLYVSDAFHK		2	2416.24	3;4;5	K	A	22	sp|P01008|ANT3_HUMAN	381	402	yes	3.9407e-21	170.91	27	-1.021	A1;A10;A3;A4;A5;A6;A7;A8;A9;B1;B10;B2;B3;B4;B6;B8;B9	56504000	122810000	206920000	28544000	36800000	611870000	481270000	165980000	373360000	16008000	255340000	34232000	84173000	32311000	0	795280000	0	91693000	447950000	3.52974	0.480967	2.45827	0.883414	--	0.769377	--	1.81017	0.833486	231562000	0.9079	219623375	1.2534
748	LHDVNSDGFLDEQELEALFTKELEK		1	2918.42	4	K	V	25	sp|P80303|NUCB2_HUMAN	252	276	yes	4.1424e-21	162.82	4	-2.7754	A8;B10;B6;B7	0	0	0	0	0	0	0	149500000	0	0	83398000	0	0	0	0	158470000	441960000	0	0	--	--	--	--	--	--	--	--	--	149500000	--	2.27943e+08	0.8296
749	WLQGSQELPREK	WLQ(de)GSQELPREK	1	1469.76	2;3	R	Y	12	sp|P01876|IGHA1_HUMAN;sp|P01877|IGHA2_HUMAN;sp|P0DOX2|IGA2_HUMAN	366	377	no	4.4359e-21	189.58	288	-0.78245	A10;A3;A6;A7;A8;A9;B10;B5;B6;B7;B8;B9	0	6470300000	3540000000	0	0	3093300000	4788100000	3444900000	8226400000	0	8638500000	0	0	0	4265300	18389000000	9569900000	10238000000	4801500000	--	0.749007	--	--	--	0.168215	0.500329	0.336482	1.7133	4.92717e+09	0.4137	8.60686e+09	0.712
750	ALYLQYTDETFR		0	1518.74	2	K	T	12	sp|P00450|CERU_HUMAN	70	81	yes	4.4803e-21	185.6	8	-4.3968	A1;A5;A6;A7;B3;B4;B6	83927000	0	0	0	57696000	190220000	154620000	0	0	0	0	0	81483000	58198000	0	177530000	0	0	0	--	--	--	--	--	1.07148	--	--	--	121615750	0.5047	105737000	0.5982
751	DLGTESQIFISR		0	1364.69	2	K	T	12	sp|P50395|GDIB_HUMAN	391	402	yes	4.6477e-21	185.29	12	-0.92838	A1;A10;A4;A5;A8;A9;B1;B10;B2;B3;B4;B7;B9	41731000	95219000	0	21192000	39063000	0	0	80353000	124990000	12930000	67200000	41690000	47674000	52082000	0	0	106640000	0	97762000	3.22746	1.41695	--	0.406897	--	--	--	--	1.27851	6.70913e+07	0.5908	60854000	0.5373
752	TSYVTSVEENTVDVEILR	TSYVTSVEEN(de)TVDVEILR	0	2053.02	2;3	R	V	18	sp|Q02487|DSC2_HUMAN	358	375	yes	4.8151e-21	188.48	4	-4.2375	B4;B5	0	0	0	0	0	0	0	0	0	0	0	0	0	261580000	2033900	0	0	0	0	--	--	--	--	--	--	--	--	--	0	--	131806950	1.3924
753	YVTSAPMPEPQAPGR	YVTSAPM(ox)PEPQAPGR	0	1599.77	2;3	K	Y	15	sp|P01871|IGHM_HUMAN;sp|P0DOX6|IGM_HUMAN	377	391	no	4.8806e-21	170.52	255	-1.488	A1;A10;A3;A4;A5;A6;A7;A8;A9;B1;B10;B2;B3;B4;B5;B6;B7;B8;B9	1681600000	397570000	2315400000	347770000	673120000	928340000	2849600000	481580000	3070700000	787260000	1489700000	196740000	828490000	1061200000	9525100	936090000	2089100000	212500000	383380000	2.13602	0.266879	2.79472	0.327714	70.668	0.991721	1.36403	2.26626	8.00955	1.41619e+09	0.77	799398510	0.8056
754	ELLQEFIDSDAAAEAMGK		0	1936.91	2;3	K	F	18	sp|O75556|SG2A1_HUMAN	44	61	yes	5.2484e-21	220.4	3	-1.5487	A6;B3	0	0	0	0	0	598870000	0	0	0	0	0	0	164120000	0	0	0	0	0	0	--	--	--	--	--	--	--	--	--	598870000	--	164120000	--
755	KQIVAGVNYFLDVELGR		1	1920.05	2;3	R	T	17	sp|P01034|CYTC_HUMAN	80	96	yes	5.5784e-21	224.42	20	-1.9545	A1;A3;A4;A9;B1;B2;B3;B4;B5	111920000	0	28388000	262120000	0	0	0	0	94506000	309680000	0	203210000	191780000	247590000	35376000	0	0	0	0	0.361405	--	0.148024	1.05869	--	--	--	--	--	124233500	0.7946	197527200	0.5153
756	IEWLESHQDADIEDFK		0	1973.9	2;3	K	A	16	sp|P11021|BIP_HUMAN	602	617	yes	5.9105e-21	189.09	11	-0.50391	A1;A4;A5;B1;B2;B3;B4	17694000	0	0	31195000	54531000	0	0	0	0	14288000	0	10245000	38684000	100670000	0	0	0	0	0	1.23838	--	--	0.309874	--	--	--	--	--	3.44733e+07	0.5406	40971750	1.0186
757	AGELTPEEEAQYKK	(ac)AGELTPEEEAQYKK	1	1591.77	2	M	A	14	sp|Q9NZT1|CALL5_HUMAN	2	15	yes	6.3303e-21	187.97	55	-0.31663	A1;A10;A3;A4;A5;A6;A7;A8;A9;B1;B10;B2;B3;B4;B5;B6;B7;B8;B9	29043000	101580000	632110000	41356000	124460000	373240000	160710000	134090000	2055100000	41466000	62370000	24481000	44221000	66268000	2138400	1382400000	185100000	101900000	197730000	0.700405	1.62867	14.2943	0.624072	58.2024	0.269994	0.868233	1.3159	10.3935	4.05743e+08	1.5955	210807440	1.9768
758	KLLGLYGTPDNIDIWIGAIAEPLVER		1	2865.56	3	K	G	26	sp|P22079|PERL_HUMAN	596	621	yes	6.5569e-21	158.2	6	-0.37135	A1;A4;A5;B2;B3;B4	29489000	0	0	158630000	110780000	0	0	0	0	0	0	208760000	94441000	158260000	0	0	0	0	0	--	--	--	1.00234	--	--	--	--	--	99633000	0.6553	1.5382e+08	0.3724
759	GVTSVSQIFHSPDLAIR		0	1825.97	2;3	K	D	17	sp|P05155|IC1_HUMAN	217	233	yes	6.8347e-21	200.16	10	-1.3456	A1;A4;A5;B1;B2;B3;B4	51984000	0	0	25896000	71770000	0	0	0	0	6992900	0	46159000	66230000	40573000	0	0	0	0	0	7.43383	--	--	0.638257	--	--	--	--	--	4.98833e+07	0.4613	39988725	0.6152
760	IAQWQSFQLEGGLK		0	1603.84	2	R	Q	14	sp|P01023|A2MG_HUMAN	175	188	yes	7.1317e-21	192.38	29	-0.74756	A1;A10;A3;A4;A5;A6;A7;A8;A9;B1;B10;B2;B3;B4;B6;B7;B8;B9	262890000	91119000	96078000	114380000	226580000	379190000	434650000	77733000	196150000	42512000	249340000	346270000	301870000	202050000	0	272920000	47486000	86681000	271780000	6.1839	0.365441	0.318276	0.566098	--	1.38938	9.15322	0.896771	0.721723	2.08752e+08	0.6248	2.02323e+08	0.5677
761	YYYDGKDYIEFNK	YYYDGKDYIEFN(de)K	1	1716.77	2;3	K	E	13	sp|P25311|ZA2G_HUMAN	137	149	yes	7.2741e-21	224.42	255	-4.3919	A1;A10;A3;A4;A5;A6;A7;A8;A9;B1;B10;B2;B3;B4;B5;B6;B7;B8;B9	2956100000	3485700000	9666200000	2992200000	3327400000	7339700000	4775600000	6183000000	12554000000	3890100000	6912200000	4086500000	3174700000	3114100000	19556000	7581500000	6367900000	1311800000	2657400000	0.759903	0.504282	3.04476	0.960855	170.147	0.968107	0.749949	4.71337	4.72417	5.91999e+09	0.5711	3911575600	0.6215
762	LATQSNEITIPVTFESR		0	1904.98	2	K	A	17	sp|P04792|HSPB1_HUMAN	172	188	yes	7.6688e-21	230.96	5	-0.3503	A6;A7;B4;B7;B8;B9	0	0	0	0	0	70517000	88884000	0	0	0	0	0	0	13396000	0	0	83398000	45461000	172330000	--	--	--	--	--	--	1.06578	--	--	79700500	0.163	78646250	0.8735
763	IVRPWAEGTEEGAR		1	1569.79	3	K	W	14	sp|Q13438|OS9_HUMAN	595	608	yes	7.7921e-21	162.94	18	-0.4332	A1;A3;A4;A5;A6;A8;A9;B1;B10;B3;B4;B6;B7;B8	0	0	62631000	31624000	13812000	32654000	0	24767000	0	42023000	47775000	0	0	0	0	53454000	75096000	29648000	0	--	--	--	--	--	0.61088	--	0.835368	--	33097600	0.548	49599200	0.3379
764	KTQEQLALEMAELTAR		1	1830.95	2;3	K	I	16	sp|P26038|MOES_HUMAN	412	427	yes	7.8174e-21	198.29	17	-0.88753	A1;A4;A5;A8;B1;B2;B3;B4;B6	105370000	0	0	45614000	171760000	0	0	189700000	0	12127000	0	15086000	231180000	61976000	0	138780000	0	0	0	8.68888	--	--	0.735995	--	--	--	--	--	128111000	0.5143	91829800	1.0151
765	LFDSDPITVTVPVEVSR		0	1872.98	2	K	K	17	sp|P10909|CLUS_HUMAN	409	425	yes	8.0988e-21	225.23	18	-0.82548	A1;A10;A3;A4;A5;A6;A7;A8;B1;B10;B2;B3;B4;B6;B7;B8;B9	45872000	86824000	63408000	36679000	190330000	295180000	59669000	92843000	0	110670000	67188000	22136000	170700000	265180000	0	91709000	251540000	6239600	86912000	0.414494	1.29225	0.371459	0.138317	--	3.21866	0.237215	14.8796	--	108850625	0.8199	1.19142e+08	0.7752
766	AYKSELEEQLTPVAEETR		1	2092.03	2;3	K	A	18	sp|P02649|APOE_HUMAN	91	108	yes	8.2107e-21	214.45	6	-0.58673	A6;A7;A9	0	0	0	0	0	97411000	52895000	0	68421000	0	0	0	0	0	0	0	0	0	0	--	--	--	--	--	--	--	--	--	72909000	0.3099	0	--
767	TFDQLTPEESKER		1	1578.75	2;3	K	L	13	sp|O43852|CALU_HUMAN	60	72	yes	8.6889e-21	220.25	40	-0.31354	A1;A10;A3;A4;A5;A6;A7;A8;A9;B1;B10;B6;B7;B8;B9	25998000	121230000	378720000	30436000	13380000	250000000	196230000	201460000	58059000	31075000	291510000	0	0	0	0	0	441330000	87160000	170770000	0.836621	0.415869	--	--	--	--	0.444633	2.31138	0.339984	1.41724e+08	0.8788	204369000	0.8064
768	YISLIYTNYEAGKDDYVK	YISLIYTN(de)YEAGKDDYVK	1	2154.05	2;3	K	A	18	sp|P09211|GSTP1_HUMAN	104	121	yes	8.7841e-21	218.5	42	-0.60717	A1;A10;A3;A4;A5;A6;A7;A8;A9;B1;B10;B2;B3;B4;B5;B6;B9	269570000	98927000	424050000	345790000	436940000	284450000	261590000	91064000	174930000	54018000	58425000	510720000	235100000	301490000	621090	326680000	0	0	178050000	4.99037	1.69323	1.8037	1.14694	703.505	0.87073	--	--	0.982477	2.65257e+08	0.4764	2.08138e+08	0.8226
769	QATKDAGVIAGLNVLR	(gl)QATKDAGVIAGLNVLR	1	1624.93	2;3	R	I	16	sp|P0DMV9|HS71B_HUMAN;sp|P0DMV8|HS71A_HUMAN	156	171	no	8.9027e-21	183.89	5	-0.27372	A10;A8;B6	0	38896000	0	0	0	0	0	45895000	0	0	0	0	0	0	0	245120000	0	0	0	--	--	--	--	--	--	--	--	--	42395500	0.1167	245120000	--
770	AENGKLVINGNPITIFQERDPSK	AEN(de)GKLVIN(de)GNPITIFQERDPSK	2	2539.34	3;4	K	I	23	sp|P04406|G3P_HUMAN	62	84	yes	9.3686e-21	174.53	29	-0.62952	A1;A10;A4;A5;A8;A9;B10;B3;B4;B7;B8;B9	30682000	203270000	0	41732000	96974000	0	0	114690000	66072000	0	243520000	0	220760000	143500000	0	0	540210000	46460000	319730000	--	0.834716	--	0.290815	--	--	--	2.46858	0.206649	9.22367e+07	0.6836	2.52363e+08	0.6695
771	TEFLSFMNTELAAFTK		0	1848.9	2	K	N	16	sp|P31949|S10AB_HUMAN	37	52	yes	1.0553e-20	227.31	17	-1.596	A1;A10;A3;A4;A5;A6;A7;A8;A9;B1;B10;B2;B3;B4;B6;B7	59724000	16872000	93943000	97185000	329210000	144040000	70142000	26670000	283960000	37657000	56999000	458220000	287620000	327080000	0	361110000	40770000	0	0	1.586	0.296005	0.326622	0.297129	--	0.398881	1.72043	--	--	1.24638e+08	0.8866	224208000	0.7822
772	DNIQGITKPAIR		1	1324.75	2;3	R	R	12	sp|P62805|H4_HUMAN	25	36	yes	1.0858e-20	183.72	35	-0.21443	A6;A7;A8;A9;B1;B10;B2;B3;B4;B5	0	0	0	0	0	1269200000	246000000	0	141740000	120850000	48672000	31232000	62637000	77625000	7408100	0	0	0	0	--	--	--	--	--	--	--	--	--	5.52313e+08	1.128	5.80707e+07	0.6766
773	VAVVQYSGTGQQRPER		1	1773.91	2;3	R	A	16	sp|P12109|CO6A1_HUMAN	873	888	yes	1.1341e-20	180.97	34	-1.2294	A1;A10;A3;A4;A6;A7;A8;A9;B1;B10;B2;B3;B4;B5;B6;B7;B8;B9	20890000	57576000	78363000	29163000	0	64405000	102380000	51673000	105240000	22320000	92542000	13645000	13972000	33463000	319250	101300000	109570000	36585000	38753000	0.935932	0.622161	5.60857	0.8715	--	0.635785	0.93438	1.41241	2.71566	63711250	0.4836	46246925	0.8614
774	YKEENDDFASFR		1	1519.66	2;3	K	V	12	sp|P04196|HRG_HUMAN	165	176	yes	1.1649e-20	183	12	-0.70315	A6;A7;A9;B10;B6;B7;B8;B9	0	0	0	0	0	119450000	179640000	0	121520000	0	120010000	0	0	0	0	50240000	16892000	10520000	41333000	--	--	--	--	--	2.37759	10.6346	--	2.94002	1.40203e+08	0.2437	47799000	0.9124
775	LHLETDSLALVALGALDTALYAAGSK		0	2612.41	3;4	K	S	26	sp|P0C0L4|CO4A_HUMAN;sp|P0C0L5|CO4B_HUMAN	589	614	no	1.168e-20	155.05	5	-0.73765	A5;B2;B3;B4	0	0	0	0	27597000	0	0	0	0	0	0	6757000	10707000	69761000	0	0	0	0	0	--	--	--	--	--	--	--	--	--	27597000	--	29075000	1.2138
776	VHQYFNVELIQPGAVK		0	1840.98	2;3	K	V	16	sp|P01024|CO3_HUMAN	1463	1478	yes	1.17e-20	227.57	26	-0.9297	A1;A4;A5;A6;A7;B2;B3;B4	131060000	0	0	21000000	92695000	193070000	104260000	0	0	0	0	70875000	150050000	98963000	0	0	0	0	0	--	--	--	0.212201	--	--	--	--	--	108417000	0.5757	1.06629e+08	0.3764
777	YFQFQEEGKEGENR		1	1759.78	2;3	K	A	14	sp|O15144|ARPC2_HUMAN	128	141	yes	1.2564e-20	184.21	18	-0.91413	A3;A4;A6;A7;A8;A9;B3;B4;B6;B7;B8;B9	0	0	81253000	14085000	0	104000000	126600000	30468000	253120000	0	0	0	17764000	15281000	0	338490000	69755000	7757300	38106000	--	--	4.57403	0.921733	--	0.307247	1.81492	3.92766	6.64252	1.01588e+08	0.8436	8.11922e+07	1.5768
778	MREHVMNEVDTNKDR	MREHVMN(de)EVDTN(de)KDR;MREHVMN(de)EVDTNKDR;MREHVM(ox)N(de)EVDTNKDR	2	1872.86	3;4;5	R	L	15	sp|P80303|NUCB2_HUMAN	297	311	yes	1.2744e-20	160.8	72	-1.8748	A1;A10;A3;A4;A5;A8;B1;B10;B2;B3;B4;B6;B7;B8;B9	8646100	11981000	1354400	111000000	28750000	0	0	5481000	0	19431000	1646300	13871000	49364000	39832000	0	4015700	39974000	127910000	1685900	0.444964	7.27753	0.027437	2.7867	--	--	--	0.0428504	--	27868750	1.5	33081100	1.2056
779	VKEEIIEAFVQELR		1	1701.93	2;3	K	K	14	sp|P50552|VASP_HUMAN	362	375	yes	1.3766e-20	220.9	6	-0.44224	A1;A4;A5;A9;B2;B3;B4	37444000	0	0	23245000	50546000	0	0	0	25459000	0	0	77560000	111290000	41825000	0	0	0	0	0	--	--	--	0.555768	--	--	--	--	--	34173500	0.3679	7.68917e+07	0.4518
780	SDDNLLNTSALGR	SDDNLLN(de)TSALGR	0	1374.67	2	R	L	13	sp|Q8N4F0|BPIB2_HUMAN	287	299	yes	1.3854e-20	228.98	40	-0.64878	A1;A10;A3;A4;A5;A6;A7;A8;A9;B1;B10;B2;B3;B4;B5;B6;B7;B8;B9	12176000	0	331700000	30221000	27544000	169710000	144960000	41529000	198000000	36485000	119840000	22857000	17655000	30685000	816210	237320000	379330000	139350000	28583000	0.333726	--	18.7879	0.984879	33.7462	0.71511	0.382147	0.298019	6.92719	119480000	0.9405	101292121	1.2105
781	DATNVGDEGGFAPNILENKEGLELLK		1	2742.37	3	K	T	26	sp|P06733|ENOA_HUMAN	203	228	yes	1.3959e-20	153.24	10	-2.0048	A1;A4;A5;A8;A9;B2;B3;B4;B6;B9	74310000	0	0	57512000	113950000	0	0	205230000	164040000	0	0	35011000	156590000	139930000	0	162590000	0	0	70181000	--	--	--	0.411006	--	--	--	--	2.33738	123008400	0.5009	112860400	0.5051
782	ATFMVGSYGPRPEEYEFLTPVEEAPK	ATFM(ox)VGSYGPRPEEYEFLTPVEEAPK	1	2943.4	2;3	K	G	26	sp|P52566|GDIR2_HUMAN	139	164	yes	1.4366e-20	210.12	17	-0.3084	A1;A4;A5;A9;B2;B3;B4;B6	253150000	0	0	80300000	408150000	0	0	0	233300000	0	0	575880000	598920000	150140000	0	111280000	0	0	0	--	--	--	0.534834	--	--	--	--	--	243725000	0.5502	359055000	0.7361
783	NQEQLLTLASILR		0	1497.85	2	K	E	13	sp|Q9Y5Z4|HEBP2_HUMAN	151	163	yes	1.4534e-20	185.18	5	-0.55969	A1;A4;A5;A9;B1;B2;B3;B4	9910700	0	0	21201000	42174000	0	0	0	67234000	6406400	0	29344000	15025000	44626000	0	0	0	0	0	1.547	--	--	0.475082	--	--	--	--	--	35129925	0.7183	23850350	0.7033
784	AAVAAVLSPEEFMVLLDSVLPESAHR	AAVAAVLSPEEFM(ox)VLLDSVLPESAHR	0	2750.43	2;3;4	K	L	26	sp|Q8TDL5|BPIB1_HUMAN	291	316	yes	1.4698e-20	181.51	45	-4.0958	A1;A3;A4;A5;A6;A7;A9;B1;B2;B3;B4;B6;B7	21747000	0	32467000	210510000	211020000	3402600000	88421000	0	512050000	828820000	0	520760000	574510000	761190000	0	299070000	50428000	0	0	0.0262385	--	0.0565125	0.276554	--	11.3773	1.75341	--	--	6.39831e+08	1.9219	5.05796e+08	0.5761
785	LRPVAAEVYGTERQPR		2	1840.99	3;4	K	T	16	sp|P02788|TRFL_HUMAN	93	108	yes	1.5392e-20	180.74	51	-0.88	A10;A3;A6;A7;A8;A9;B10;B6;B7;B8;B9	0	163550000	282240000	0	0	1126400000	315010000	215580000	379820000	0	665640000	0	0	0	0	471670000	2327000000	77927000	208670000	--	0.245703	--	--	--	2.38811	0.135372	2.76644	1.82019	4.13767e+08	0.8633	750181400	1.2137
786	VLSNTEDLPLVTK		0	1427.79	2	R	M	13	sp|P0DP57|SLUR2_HUMAN	54	66	yes	1.5796e-20	184.44	6	-0.64548	A1;A5;B2;B3;B4	0	0	0	0	8701400	0	0	0	0	0	0	7960300	19669000	19810000	0	0	0	0	0	--	--	--	--	--	--	--	--	--	8701400	--	15813100	0.4301
787	QMEQISQFLQAAER	(gl)QMEQISQFLQAAER	0	1677.81	2	K	Y	14	sp|P37802|TAGL2_HUMAN	89	102	yes	1.6774e-20	202.3	13	-0.42332	A1;A4;A5;A8;A9;B1;B10;B2;B3;B4;B6;B7	4318200	0	0	14684000	27615000	0	0	23988000	64431000	6699600	16415000	82805000	45432000	98393000	0	64646000	37514000	0	0	0.644546	--	--	0.149238	--	--	--	--	--	27007240	0.8437	5.02721e+07	0.6702
788	EIEIDIEPTDKVER		1	1684.85	2;3	K	I	14	sp|Q15843|NEDD8_HUMAN	12	25	yes	1.6885e-20	190.15	13	-3.2102	A1;A3;A4;A5;A6;A9;B2;B3;B4	23767000	0	64108000	36426000	40727000	32322000	0	0	0	0	0	22639000	31645000	52394000	0	0	0	0	0	--	--	2.02585	0.695232	--	--	--	--	--	39470000	0.3833	3.55593e+07	0.4291
789	TEGDGVYTLNDKK	TEGDGVYTLN(de)DKK	1	1438.69	2;3	R	Q	13	sp|P00738|HPT_HUMAN;sp|P00739|HPTR_HUMAN	60	72	no	1.6981e-20	181.53	34	-0.37208	A3;A4;A5;A6;A7;A8;B1;B10;B2;B3;B6;B7;B8;B9	0	0	32574000	11329000	109570000	47404000	42540000	0	0	562840	33760000	1412700	35267000	0	0	27086000	14465000	144610000	0	--	--	0.92364	--	--	1.75013	2.94089	--	--	48683400	0.7548	3.67376e+07	1.3516
790	DLAQYDAAHHEEFKR		1	1828.85	3;4;5	R	Y	15	sp|Q02818|NUCB1_HUMAN	164	178	yes	1.8089e-20	155.28	54	-0.78021	A1;A10;A3;A4;A5;A6;A7;A8;A9;B1;B10;B3;B4;B6;B7;B8;B9	15640000	134270000	332780000	77220000	6142600	129940000	237390000	115020000	56256000	56840000	343690000	0	15501000	76255000	0	37952000	410080000	105080000	132330000	0.275158	0.390672	21.4683	1.01265	--	3.4238	0.578887	1.09459	0.425119	1.2274e+08	0.8596	147216000	1.0016
791	ADSRDPASDQMQHWK	(ac)ADSRDPASDQM(ox)QHWK;(ac)ADSRDPASDQMQHWK	1	1770.77	2;3	M	E	15	sp|P04040|CATA_HUMAN	2	16	yes	1.825e-20	179.79	62	-0.68955	A10;A3;A5;A6;A7;A8;A9;B10;B2;B3;B4;B5;B6;B7;B8;B9	0	70627000	90960000	0	54193000	111150000	128800000	7920400	380200000	0	136090000	47041000	79834000	96544000	1183600	454080000	44838000	19373000	107380000	--	0.518973	1.13936	--	45.7866	0.244781	2.87256	0.408837	3.5407	1.2055e+08	1.0048	1.09596e+08	1.2429
792	DYVSQFEGSALGK		0	1399.66	2	R	Q	13	sp|P02647|APOA1_HUMAN	52	64	yes	1.8778e-20	182.71	22	-0.19866	A1;A4;A5;B1;B2;B3;B4;B6;B9	238430000	0	0	0	211460000	0	0	0	0	0	0	616680000	305150000	0	0	381990000	0	0	405390000	--	--	--	--	--	--	--	--	--	224945000	0.0848	427302500	0.312
793	KNPDSQYGELIEK		1	1519.75	2;3	R	Y	13	sp|P30085|KCY_HUMAN	43	55	yes	1.8788e-20	180.24	3	0.14505	A8;A9	0	0	0	0	0	0	0	18398000	99924000	0	0	0	0	0	0	0	0	0	0	--	--	--	--	--	--	--	--	--	59161000	0.9744	0	--
794	ESDVPLKTEEFEVTK		1	1749.87	2;3	R	T	15	sp|Q969H8|MYDGF_HUMAN	131	145	yes	1.9276e-20	192.4	19	-0.90466	A10;A3;A6;A7;A8;A9;B2;B3;B4;B5;B6;B7	0	40878000	30992000	0	0	97573000	72061000	49814000	191570000	0	0	24394000	30756000	30969000	544470	82571000	0	0	0	--	--	1.00767	--	--	1.18169	--	--	--	8.04813e+07	0.7385	33846894	0.8851
795	RTLTGTAALTVQSQEDNLR		1	2073.08	3	R	S	19	sp|P09960|LKHA4_HUMAN	33	51	yes	1.9286e-20	149.36	21	-2.4072	A1;A10;A3;A4;A5;A6;A7;A8;B10;B2;B3;B4;B6;B7;B8;B9	26880000	41628000	35537000	15240000	41198000	52229000	0	54921000	0	0	48753000	18084000	18918000	29704000	0	122370000	48001000	5205800	24026000	--	0.853855	1.87848	0.513062	--	0.426812	--	10.55	--	3.82333e+07	0.3636	39382725	0.9314
796	IIRSSEDPNEDIVER		1	1770.87	2;3	R	N	15	sp|P01591|IGJ_HUMAN	44	58	yes	1.9357e-20	192.39	13	-0.50886	A10;B10;B7;B8;B9	0	118670000	0	0	0	0	0	0	0	0	151460000	0	0	0	0	0	115480000	133670000	56402000	--	0.783507	--	--	--	--	--	--	--	118670000	--	114253000	0.3612
797	FSHEEIAMATVTALR	FSHEEIAM(ox)ATVTALR	0	1674.84	2;3	K	R	15	sp|P04075|ALDOA_HUMAN	244	258	yes	1.9429e-20	184.87	55	-0.81017	A1;A10;A3;A4;A5;A6;A7;A8;A9;B1;B10;B2;B3;B4;B5;B6;B7;B8;B9	222220000	211380000	395510000	126830000	297630000	237170000	295880000	234560000	145400000	73410000	206640000	284500000	307720000	355630000	973710	398290000	173930000	29528000	148530000	3.02711	1.02294	1.28529	0.356635	305.666	0.595471	1.70114	7.94365	0.978927	2.40731e+08	0.3399	197915171	0.6951
798	DSPVLIDFFEDTER		0	1681.78	2	K	Y	14	sp|P04196|HRG_HUMAN	140	153	yes	1.9825e-20	190.15	3	-0.33396	A1;A4;A5;B1;B10;B2;B3;B4;B6	21884000	0	0	5271700	15779000	0	0	0	0	1217300000	56356000	2716900000	3107400000	1564100000	0	371700	0	0	0	0.0179775	--	--	0.00337044	--	--	--	--	--	1.43116e+07	0.5871	1443737950	0.9011
799	VSVGLLLVKSVQVK		1	1467.94	2;3	R	L	14	sp|Q96DA0|ZG16B_HUMAN	79	92	yes	2.0684e-20	191.79	18	-0.57806	A1;A4;A5;B1;B10;B2;B3;B4	69921000	0	0	214960000	119030000	0	0	0	0	61819000	111250000	76515000	32649000	19098000	0	0	0	0	0	1.13106	--	--	11.2556	--	--	--	--	--	134637000	0.5479	60266200	0.6053
800	ATIADLILSALER		0	1384.79	2	K	A	13	sp|Q6UX73|CP089_HUMAN	33	45	yes	2.0956e-20	181.44	4	-0.18121	A3;A5;B2;B4	0	0	16528000	0	4703000	0	0	0	0	0	0	3015800	0	5572300	0	0	0	0	0	--	--	--	--	--	--	--	--	--	10615500	0.7877	4294050	0.421
801	LYGSAGPPPTGEEDTAEKDEL		1	2174.99	2	K	-	21	sp|P11021|BIP_HUMAN	634	654	yes	2.1073e-20	160.5	13	-0.14382	A5;A8;A9;B6;B7	0	0	0	0	0	0	0	21909000	0	0	0	0	0	0	0	0	75207000	0	0	--	--	--	--	--	--	--	--	--	21909000	--	75207000	--
802	VQSTPVTIQVINVR		0	1552.89	2;3	R	E	14	sp|P32926|DSG3_HUMAN	365	378	yes	2.227e-20	189.72	24	-0.93264	A1;A3;A4;A5;A9;B1;B10;B2;B3;B4;B6;B7;B9	37393000	0	152350000	117150000	66298000	0	0	0	301000000	90099000	71185000	17876000	46778000	204380000	0	84905000	280960000	0	57461000	0.415021	--	3.25687	0.573197	--	--	--	--	5.23834	134838200	0.7638	106705500	0.8369
803	TGLLVEQSGDYIK		0	1421.74	2	R	V	13	sp|Q9HC84|MUC5B_HUMAN	162	174	yes	2.2821e-20	180.36	46	-0.27095	A1;A10;A3;A4;A5;A6;A7;A8;A9;B1;B10;B2;B3;B4;B5;B6;B7;B8;B9	563520000	697260000	3350900000	886090000	1193000000	2760400000	2425200000	756370000	3559600000	1048000000	1736300000	1017000000	595980000	1019400000	44816000	1791200000	1585000000	786980000	1150900000	0.53771	0.401578	5.6225	0.869227	26.62	1.54109	1.53009	0.961104	3.09288	1.79915e+09	0.6765	1077557600	0.4985
804	IHGFDLAAINTQR	IHGFDLAAIN(de)TQR	0	1454.76	2;3	R	C	13	sp|P22079|PERL_HUMAN	545	557	yes	2.3285e-20	212.82	170	-0.99806	A1;A10;A3;A4;A5;A6;A7;A8;A9;B1;B10;B2;B3;B4;B5;B6;B7;B8;B9	1329100000	2118200000	3340600000	2680100000	1198900000	2413500000	2065100000	4155300000	4325100000	1978400000	3470400000	931980000	1184300000	1156500000	7485000	4702700000	9685500000	1483200000	1886100000	0.671805	0.610362	2.82074	2.31742	160.174	0.513216	0.213216	2.80158	2.29314	2625100000	0.4275	2648656500	1.0611
805	LRPVAAEVYGTER		1	1459.78	2;3	K	Q	13	sp|P02788|TRFL_HUMAN	93	105	yes	2.3447e-20	199.4	149	-0.49388	A1;A10;A3;A4;A5;A6;A7;A8;A9;B1;B10;B2;B3;B4;B5;B6;B7;B8;B9	1685100000	891730000	4901300000	1196200000	2283200000	20531000000	2729100000	2049200000	5533000000	934430000	5845800000	280230000	2854300000	6914300000	38366000	1244600000	8503700000	316340000	906740000	1.80335	0.152542	1.71716	0.173004	59.511	16.4961	0.320931	6.47784	6.10208	4.64443e+09	1.3272	2783880600	1.1256
806	YTLNILEEIGGGQK		0	1533.8	2	R	V	14	sp|P13796|PLSL_HUMAN	502	515	yes	2.6589e-20	238.51	3	-0.48474	A1;A5;B2;B3;B4	43733000	0	0	0	50809000	0	0	0	0	0	0	69379000	69009000	32706000	0	0	0	0	0	--	--	--	--	--	--	--	--	--	47271000	0.1058	5.70313e+07	0.3694
807	LYQQHGAGLFDVTR		0	1603.81	2;3	R	G	14	sp|O14773|TPP1_HUMAN	507	520	yes	2.6915e-20	188.91	16	-1.5321	A1;A3;A4;A5;B1;B10;B2;B3;B4;B6;B7;B8;B9	75770000	0	150400000	69654000	68005000	0	0	0	0	64589000	69182000	25211000	52902000	71703000	0	160790000	251060000	10435000	31207000	1.17311	--	2.84299	0.971424	--	--	--	--	--	90957250	0.4372	8.18977e+07	0.9373
808	LKEGDTMMGQQVAK		1	1534.75	2;3	R	V	14	sp|Q14914|PTGR1_HUMAN	57	70	yes	2.8787e-20	191.06	18	-2.1942	A10;A3;A6;A7;A8;A9;B2;B3;B4;B5;B6;B7;B8;B9	0	31422000	47169000	0	0	45042000	28067000	46874000	87596000	0	0	15616000	5515000	58369000	506990	290270000	0	3741500	22687000	--	--	8.55286	--	--	0.155173	--	12.5281	3.86107	47695000	0.4448	5.66722e+07	1.8504
809	LLETIDQLYLEYAK		0	1710.91	2	K	R	14	sp|P12814|ACTN1_HUMAN	503	516	yes	3.0511e-20	188.28	2	0.94031	B2;B3	0	0	0	0	0	0	0	0	0	0	0	25758000	44139000	0	0	0	0	0	0	--	--	--	--	--	--	--	--	--	0	--	34948500	0.3719
810	ITGTMPPLPLEATGLALSSLR		0	2137.18	2	K	L	21	sp|P08571|CD14_HUMAN	128	148	yes	3.2595e-20	179.56	8	-2.1891	A3;A4;A5;A9;B1;B2;B3;B4	0	0	16027000	23354000	37958000	0	0	0	18480000	34108000	0	30029000	21606000	53899000	0	0	0	0	0	--	--	0.741785	0.433292	--	--	--	--	--	23954750	0.4099	34910500	0.3921
811	QPSQPPPQEIFVPTTK	(gl)QPSQPPPQEIFVPTTK	0	1792.94	2;3	K	E	16	sp|Q9UBC9|SPRR3_HUMAN	23	38	yes	3.3157e-20	184.96	34	-0.27816	A1;A10;A3;A4;A8;B4;B5;B7	72957000	68724000	41551000	64300000	0	0	0	44241000	0	0	0	0	0	250280000	347710	0	60424000	0	0	--	--	--	0.256912	--	--	--	--	--	58354600	0.248	1.03684e+08	1.2583
812	ADAVTLDGGFIYEAGLAPYK		0	2070.03	2;3	R	L	20	sp|P02788|TRFL_HUMAN	73	92	yes	3.4495e-20	194.85	133	-2.5625	A1;A3;A4;A5;A6;A7;A8;A9;B1;B10;B2;B3;B4;B5;B7	47621000	0	70944000	119880000	208430000	1929200000	77587000	102370000	129900000	38672000	92127000	89900000	445850000	479090000	27472000	0	507350000	0	0	1.23141	--	0.159121	0.250224	7.587	--	0.152926	--	--	335741500	1.9232	2.40066e+08	0.9332
813	GQAAVQQLQAEGLSPR		0	1651.86	2	R	F	16	sp|P16152|CBR1_HUMAN	43	58	no	3.5646e-20	184.31	5	-0.32005	A8;A9;B7;B8	0	0	0	0	0	0	0	14202000	120070000	0	0	0	0	0	0	0	93512000	10225000	0	--	--	--	--	--	--	--	1.38895	--	67136000	1.115	51868500	1.1354
814	HRDYETATLSDIK		1	1547.76	2;3	K	A	13	sp|O43707|ACTN4_HUMAN	438	450	yes	3.8207e-20	174.24	23	-1.6019	A1;A3;A4;A5;A6;A7;A8;A9;B1;B10;B2;B3;B4;B6;B7;B9	24343000	0	74814000	14437000	37389000	106880000	63994000	28660000	176170000	10350000	99269000	9045700	29004000	35412000	0	299290000	58975000	0	41514000	2.35198	--	2.57944	0.407687	--	0.357112	1.0851	--	4.24363	65835875	0.8219	7.28575e+07	1.317
815	DTDSEEEIREAFR		1	1595.71	2;3	K	V	13	sp|P0DP25|CALM3_HUMAN;sp|P0DP24|CALM2_HUMAN;sp|P0DP23|CALM1_HUMAN	79	91	yes	3.8207e-20	214.26	19	-0.40209	A1;A4;A5;A8;A9;B1;B2;B3;B4;B5	63102000	0	0	47297000	86812000	0	0	26348000	118580000	9798200	0	39280000	78386000	47462000	227510	0	0	0	0	6.44016	--	--	0.996524	381.574	--	--	--	--	68427800	0.5218	35030742	0.8914
816	NGENLEVR	N(de)GENLEVR;N(de)GEN(de)LEVR	0	929.457	2	R	W	8	sp|P20061|TCO1_HUMAN	422	429	yes	3.9354e-20	170.66	50	-0.79808	A10;A3;A4;A6;A7;A8;A9;B1;B10;B2;B3;B4;B6;B7;B8;B9	0	49709000	227030000	5817000	0	100910000	19401000	71225000	112580000	8861500	158880000	19843000	20861000	4463400	0	194980000	123070000	114170000	26710000	--	0.312871	10.883	1.30327	--	0.51754	0.157642	0.62385	4.2149	8.38103e+07	0.8874	7.46488e+07	0.9813
817	ISPQIQLSGQTEQTQK		0	1784.93	2	R	A	16	sp|Q9UBG3|CRNN_HUMAN	179	194	yes	4.3851e-20	238.2	5	0.075423	A8;B7;B8;B9	0	0	0	0	0	0	0	0	0	0	0	0	0	0	0	0	32326000	20543000	36391000	--	--	--	--	--	--	--	--	--	0	--	2.97533e+07	0.2767
818	LYTLVLTDPDAPSR		0	1559.82	2	K	K	14	sp|P30086|PEBP1_HUMAN	63	76	yes	4.4788e-20	185.77	24	-0.019477	A1;A3;A4;A5;A8;A9;B1;B2;B3;B4;B5;B6;B7	75168000	0	90059000	70061000	148890000	0	0	113980000	193910000	28899000	0	162740000	126530000	145930000	1057800	128120000	43869000	0	0	2.60106	--	0.71176	0.4801	140.754	--	--	--	--	1.15345e+08	0.4177	9.10208e+07	0.7088
819	THYSNIEANESEEVR		0	1776.79	2;3	R	Q	15	sp|P04632|CPNS1_HUMAN	85	99	yes	4.983e-20	211.26	8	-0.38109	A10;A6;A7;A9;B10;B3;B4;B6;B7;B8;B9	0	11445000	0	0	0	16537000	37037000	0	21054000	0	24483000	0	3391000	16671000	0	56335000	41993000	4698400	20480000	--	0.467467	--	--	--	0.293548	0.88198	--	1.02803	21518250	0.5142	2.40073e+07	0.8036
820	TYFPHFDLSHGSAQVK		0	1832.88	2;3;4	K	G	16	sp|P69905|HBA_HUMAN;CON__P01966	42	57	no	5.0346e-20	180.47	55	-0.88913	A1;A10;A3;A4;A5;A6;A7;A9;B1;B10;B3;B4;B5;B6;B8;B9	293550000	20362000	520420000	74519000	661450000	813820000	758430000	0	132600000	38465000	698800000	0	1172600000	261520000	4457700	1085400000	0	565510000	1334700000	7.63161	0.0291385	0.443817	0.284946	148.384	0.749788	--	--	0.0993482	409393875	0.7805	6.45182e+08	0.8038
821	SLGLSLSGGDQEDAGR		0	1560.74	2	R	I	16	sp|Q9UJ70|NAGK_HUMAN	70	85	yes	5.1219e-20	180.24	2	0.80597	A8;A9	0	0	0	0	0	0	0	15112000	50314000	0	0	0	0	0	0	0	0	0	0	--	--	--	--	--	--	--	--	--	32713000	0.7609	0	--
822	VVAGVANALAHKYH	VVAGVAN(de)ALAHKYH	1	1448.79	2;3;4	K	-	14	sp|P02042|HBD_HUMAN;sp|P68871|HBB_HUMAN	134	147	no	5.23e-20	200.05	206	-0.67584	A1;A10;A3;A5;A6;A7;A8;A9;B10;B3;B4;B5;B6;B7;B8;B9	32792000	39371000	1163800000	0	65838000	1994500000	4321700000	52371000	814010000	0	3668800000	0	132870000	13026000	2046000	2796100000	158760000	3125000000	3453900000	--	0.0107313	8.75894	--	32.1789	0.713315	27.2216	0.0167587	0.235679	1060547750	1.4114	1668812750	1.0314
823	ADNFEYSDPVDGSISR		0	1770.77	2	K	N	16	sp|P36871|PGM1_HUMAN	471	486	yes	5.2408e-20	179.93	13	-1.057	A10;A5;A6;A7;A8;A9;B10;B2;B3;B4;B6;B9	0	15678000	0	0	15588000	0	29306000	35624000	101710000	0	0	14395000	12196000	13498000	0	59615000	0	0	13601000	--	--	--	--	--	--	--	--	7.47813	39581200	0.9046	22661000	0.9123
824	YLGPQYVAGITNLK	YLGPQYVAGITN(de)LK	0	1535.83	2;3	K	K	14	sp|P02788|TRFL_HUMAN	681	694	yes	6.0389e-20	183.03	63	-0.85958	A1;A10;A3;A4;A5;A6;A8;B1;B10;B2;B3;B4;B5;B6;B7;B8;B9	260510000	160470000	512290000	421290000	641060000	5151900000	0	355470000	0	176110000	474540000	188530000	1137800000	1179200000	1505500	204650000	1105900000	31135000	157010000	1.47925	0.338159	0.450246	0.357268	425.812	25.1742	--	11.4171	--	1.07186e+09	1.685	465638050	1.0372
825	VMFTEDLKLPASFDAR	VM(ox)FTEDLKLPASFDAR	1	1838.92	2;3	R	E	16	sp|P07858|CATB_HUMAN	72	87	yes	6.3826e-20	217.91	14	-1.5266	A1;A3;A4;A5;B1;B10;B2;B3;B4;B6;B7	25683000	0	55004000	77910000	57307000	0	0	0	0	151510000	61010000	42876000	65675000	102410000	0	93240000	103220000	0	0	0.169514	--	0.837518	0.760766	--	--	--	--	--	53976000	0.3981	88563000	0.4061
826	MDATANDVPSPYEVR	MDATAN(de)DVPSPYEVR	0	1663.75	2	K	G	15	sp|P30101|PDIA3_HUMAN	434	448	yes	6.9687e-20	184.87	10	-1.9281	A10;A8;A9;B10;B6;B7	0	10666000	0	0	0	0	0	41045000	70214000	0	0	0	0	0	0	0	68246000	0	0	--	--	--	--	--	--	--	--	--	4.06417e+07	0.7326	68246000	--
827	GSFTSSSNFMSIR	GSFTSSSN(de)FMSIR;GSFTSSSNFM(ox)SIR	0	1419.65	2	R	F	13	sp|Q9UGM3|DMBT1_HUMAN	2086	2098	yes	7.0292e-20	164.64	48	-2.9106	A1;A10;A3;A4;A5;A6;A7;A8;A9;B1;B10;B3;B4;B5;B6;B7;B8;B9	23345000	169870000	1447100000	78699000	77429000	898810000	161180000	162310000	0	206820000	867370000	0	30174000	17892000	2189100	217150000	564020000	170140000	203220000	0.112876	0.195845	47.9585	4.39856	35.3702	4.13912	0.28577	0.953979	--	377342875	1.3649	2.53219e+08	1.1298
828	IHLISTQSAIPYALR		0	1681.95	2;3	K	V	15	sp|P02679|FIBG_HUMAN	259	273	yes	7.0535e-20	223.71	23	-0.91866	A1;A3;A4;A5;A6;A7;A9;B1;B2;B3;B4;B5;B6	238790000	0	122050000	77719000	267840000	120150000	119180000	0	254510000	24468000	0	124330000	223960000	101330000	442810	64738000	0	0	0	9.75928	--	0.544963	0.766989	604.864	1.85594	--	--	--	1.71463e+08	0.4599	89878135	0.8929
829	DYGVYLEDSGHTLR		0	1623.75	2;3	K	G	14	sp|Q13162|PRDX4_HUMAN	187	200	yes	7.2134e-20	180.97	11	-0.53776	A1;A4;A5;A9;B1;B2;B3;B4;B6	38377000	0	0	56107000	43784000	0	0	0	58219000	60175000	0	21789000	43621000	18051000	0	51556000	0	0	0	0.637757	--	--	3.10825	--	--	--	--	--	49121750	0.1951	39038400	0.4728
830	VWVLQDQTLIAVPR		0	1636.93	2	R	K	14	sp|Q9UHA7|IL36A_HUMAN	22	35	yes	7.7271e-20	180.07	2	-0.39797	B3;B4	0	0	0	0	0	0	0	0	0	0	0	0	23571000	55172000	0	0	0	0	0	--	--	--	--	--	--	--	--	--	0	--	39371500	0.5675
831	FAAYFQQGDMESNGK	FAAYFQQGDMESN(de)GK	0	1691.72	2	R	Y	15	sp|P06744|G6PI_HUMAN;CON__Q3ZBD7	348	362	yes	8.654e-20	189.13	13	-0.98204	A1;A4;A5;A6;A7;A8;A9;B1;B10;B2;B3;B4;B6	54524000	0	0	29461000	107830000	128080000	58368000	57936000	387060000	14485000	68183000	128020000	57584000	45442000	0	155950000	0	0	0	3.76417	--	--	0.648321	--	0.821289	--	--	--	1.17608e+08	1.0508	7.82773e+07	0.6804
832	DTVIKPLLVEPEGLEK		1	1779	2;3	K	E	16	sp|P01023|A2MG_HUMAN	897	912	yes	8.7341e-20	182.02	43	-1.8486	A1;A10;A3;A4;A5;A6;A7;A8;A9;B1;B10;B2;B3;B4;B5;B6;B8;B9	190710000	62417000	58557000	54966000	151760000	215940000	175950000	44866000	326580000	20008000	188500000	297860000	267470000	126880000	612770	313990000	0	68785000	381710000	9.53169	0.331125	0.218929	0.433212	247.662	0.687729	--	0.652264	0.855571	1.42416e+08	0.6729	1.85091e+08	0.7471
833	LRTEGDGVYTLNDK	LRTEGDGVYTLN(de)DK	1	1579.78	2;3	K	K	14	sp|P00738|HPT_HUMAN;sp|P00739|HPTR_HUMAN	58	71	no	8.9176e-20	204.48	31	-1.501	A1;A5;A6;A7;A9;B10;B6;B8;B9	8733900	0	0	0	105010000	266360000	198460000	0	150500000	0	180320000	0	0	0	0	65036000	0	191360000	95156000	--	--	--	--	--	4.09558	--	--	1.58161	145812780	0.6665	132968000	0.4696
834	DTSASTAYMELSSLR		0	1630.75	2	R	S	15	sp|A0A0C4DH29|HV103_HUMAN	92	106	yes	9.1861e-20	182.08	9	-1.317	A5;A6;B1;B2;B3;B4	0	0	0	0	52547000	57062000	0	0	0	33286000	0	21488000	57978000	84561000	0	0	0	0	0	--	--	--	--	--	--	--	--	--	54804500	0.0583	49328250	0.5672
835	YSPSFQGQVTISADK		0	1626.79	2	R	S	15	sp|A0A0C4DH38|HV551_HUMAN	79	93	yes	1.0893e-19	179.94	37	-0.87543	A1;A3;A4;A5;A6;A7;A8;B1;B10;B2;B3;B4	57802000	0	20766000	34870000	79214000	37681000	40237000	0	0	33311000	53515000	18632000	39064000	69157000	0	0	0	0	0	1.73522	--	0.531589	0.504215	--	--	--	--	--	45095000	0.4545	42735800	0.4528
836	EAVHVTVPDAITEWK		0	1693.87	2;3	K	A	15	sp|A8K2U0|A2ML1_HUMAN	750	764	yes	1.112e-19	224.66	21	-2.8887	A1;A3;A4;A5;A8;A9;B1;B2;B3;B4;B6	93570000	0	141380000	201850000	145520000	0	0	117310000	228660000	102870000	0	176170000	203750000	370680000	0	194780000	0	0	0	0.909595	--	0.69389	0.54454	--	--	--	--	--	154715000	0.3307	209650000	0.4692
837	ISTSLPVLDLIDAIQPGSINYDLLK		0	2697.48	2;3	K	T	25	sp|P13796|PLSL_HUMAN	546	570	yes	1.1259e-19	209.33	16	-0.87761	A1;A3;A4;A5;A6;A9;B2;B3;B4;B6	14320000	0	39530000	22844000	193710000	21282000	0	0	260670000	0	0	233290000	140570000	169550000	0	133890000	0	0	0	--	--	0.281212	0.134733	--	0.158951	--	--	--	9.20593e+07	1.1635	169325000	0.2679
838	FTEGPPLHKDDVNGIR	FTEGPPLHKDDVN(de)GIR	1	1793.91	2;3;4	R	H	16	sp|P14780|MMP9_HUMAN	425	440	yes	1.2116e-19	181.76	110	-1.131	A1;A10;A3;A4;A5;A6;A7;A8;A9;B1;B10;B2;B3;B4;B5;B6;B7;B8;B9	162840000	515080000	266550000	26438000	153290000	348080000	821230000	403550000	1073100000	20044000	607450000	135350000	147570000	62730000	1485400	1580200000	274870000	46070000	239600000	8.12413	0.847938	1.80626	0.421457	103.198	0.220276	2.9877	8.7595	4.47871	4.18906e+08	0.8085	311536940	1.5413
839	TVAAPSVFIFPPSDEQLK		0	1945.02	2;3	R	S	18	sp|P01834|IGKC_HUMAN	2	19	yes	1.5041e-19	154.86	338	-2.2849	A1;A10;A3;A4;A5;A6;A7;A8;A9;B1;B10;B2;B3;B4;B5;B6;B7;B8;B9	4826900000	4951600000	1898300000	3839700000	6269900000	5558800000	2520700000	3320300000	4608900000	2918100000	3173900000	4480200000	6704100000	6402400000	32869000	4993800000	5105300000	283100000	479990000	1.65412	1.5601	0.283155	0.599728	190.754	1.11314	0.493742	11.7284	9.60208	4.19946e+09	0.3397	3457375900	0.7239
840	ELTIGSKLQDAEIAR		1	1642.89	2;3	K	L	15	sp|P06703|S10A6_HUMAN	41	55	yes	1.7795e-19	182.25	5	-1.2289	B6;B7	0	0	0	0	0	0	0	0	0	0	0	0	0	0	0	184040000	35083000	0	0	--	--	--	--	--	--	--	--	--	0	--	109561500	0.9614
841	NQVALNPQNTVFDAK	N(de)QVALNPQNTVFDAK	0	1657.84	2	K	R	15	sp|P0DMV9|HS71B_HUMAN;sp|P0DMV8|HS71A_HUMAN	57	71	yes	2.1701e-19	205.07	60	-2.8939	A1;A10;A3;A4;A5;A6;A7;A8;A9;B1;B10;B2;B3;B4;B5;B6;B7;B8;B9	72544000	108410000	100180000	38057000	137220000	131330000	44912000	153690000	607700000	18121000	77831000	80473000	100550000	113350000	1977500	438120000	151210000	10864000	94925000	4.00331	1.39289	0.99632	0.335748	69.3906	0.299758	0.297017	14.1467	6.4019	1.54894e+08	1.1265	108742150	1.1532
842	AADAEAEVASLNRR	AADAEAEVASLN(de)RR	1	1471.74	2;3	K	I	14	sp|P06753|TPM3_HUMAN	79	92	yes	2.3091e-19	188.28	18	-0.43429	A10;A3;A6;A7;A8;A9;B10;B6;B7;B8;B9	0	50204000	12016000	0	0	75803000	115950000	41201000	183650000	0	104460000	0	0	0	0	197320000	56560000	8765200	89472000	--	0.480605	--	--	--	0.384163	2.05004	4.70052	2.0526	79804000	0.7738	91315440	0.7634
843	INSDGSSTSYADSVK	IN(de)SDGSSTSYADSVK	0	1529.68	2	R	G	15	sp|A0A0B4J1X5|HV374_HUMAN	70	84	yes	2.6845e-19	179.67	8	-0.50019	A10;A3;A6;A7;A8;A9;B1;B10;B2;B3;B4;B6;B7;B8	0	4739300	14347000	0	0	5831700	12367000	16736000	21697000	3001700	15808000	3382700	4186800	25217000	0	25307000	28855000	10661000	0	--	0.299804	3.42672	--	--	0.230438	0.428591	1.56983	--	1.26197e+07	0.5142	14552400	0.7421
844	LGPHAGDVEGHLSFLEKDLR		1	2189.12	4	K	D	20	sp|P06727|APOA4_HUMAN	329	348	yes	4.149e-19	148.44	1	0.084912	B9	0	0	0	0	0	0	0	0	0	0	0	0	0	0	0	0	0	0	42014000	--	--	--	--	--	--	--	--	--	0	--	42014000	--
845	ELEDATETADAMNR	ELEDATETADAM(ox)NR	0	1564.67	2	R	E	14	sp|P35579|MYH9_HUMAN	1899	1912	yes	4.6134e-19	160.36	3	-3.8497	A6;A7;B3	0	0	0	0	0	0	12555000	0	0	0	0	0	4371400	0	0	0	0	0	0	--	--	--	--	--	--	--	--	--	12555000	--	4371400	--
846	IKDAFDRNPELQNLLLDDFFK		2	2550.31	3;4	K	S	21	sp|P52209|6PGD_HUMAN	376	396	yes	5.8575e-19	155.44	7	-0.41912	A1;A4;A5;B1;B2;B3;B4	39596000	0	0	57541000	149270000	0	0	0	0	18731000	0	66138000	130680000	121310000	0	0	0	0	0	2.11393	--	--	0.47433	--	--	--	--	--	8.21357e+07	0.7162	84214750	0.6189
847	MDKNELVQK	(ac)MDKN(de)ELVQK;(ac)M(ox)DKNELVQK;(ac)MDKNELVQK;(ac)M(ox)DKN(de)ELVQK	1	1103.56	2	-	A	9	sp|P63104|1433Z_HUMAN	1	9	yes	6.065e-19	188.66	58	-0.73588	A1;A10;A3;A4;A5;A6;A7;A8;A9;B1;B10;B2;B3;B4;B5;B6;B7;B8;B9	38361000	68948000	367580000	128160000	128580000	24101000	216160000	495000000	3174600000	35785000	24399000	40893000	95987000	137800000	8607700	1714200000	407270000	64000000	289730000	1.07199	2.82585	3.82948	0.930044	14.9378	0.0140596	0.530754	7.73438	10.9571	5.15721e+08	1.9572	281867170	1.8434
848	QEPSQGTTTYAVTSILR	(gl)QEPSQGTTTYAVTSILR	0	1850.94	2;3	R	V	17	sp|P01877|IGHA2_HUMAN;sp|P0DOX2|IGA2_HUMAN	385	401	no	7.6904e-19	199.96	30	-0.047395	B2;B3;B4;B5	0	0	0	0	0	0	0	0	0	0	0	28020000	869250000	2663200000	2534800	0	0	0	0	--	--	--	--	--	--	--	--	--	0	--	890751200	1.4015
849	LIALSIDSVEDHLAWSK		0	1896	3	K	D	17	sp|P30041|PRDX6_HUMAN	68	84	yes	7.9872e-19	113.69	1	NAN	B4	0	0	0	0	0	0	0	0	0	0	0	0	0	0	0	0	0	0	0	--	--	--	--	--	--	--	--	--	0	--	0	--
850	ALNSMGQDLERPLELR	ALNSM(ox)GQDLERPLELR;ALN(de)SM(ox)GQDLERPLELR;ALN(de)SMGQDLERPLELR	1	1840.95	3	R	V	16	sp|Q02413|DSG1_HUMAN	129	144	yes	1.081e-18	152.34	41	-1.4895	A1;A10;A4;A5;A7;A8;A9;B1;B10;B2;B3;B4;B6;B7;B8;B9	51435000	112970000	0	188310000	39013000	0	28472000	256840000	446480000	29304000	0	17679000	105090000	196900000	0	52630000	672780000	65496000	0	1.75522	--	--	0.956374	--	--	0.0423199	3.92146	--	1.60503e+08	0.9455	1.6284e+08	1.4294
851	YYPYQSFQTPQHPSFLFQDK		0	2520.18	2;3	R	R	20	sp|Q08380|LG3BP_HUMAN	455	474	yes	2.5001e-18	146.1	16	-1.3435	A1;A4;A5;B1;B2;B3;B4	86211000	0	0	128510000	108270000	0	0	0	0	86136000	0	63051000	86024000	263730000	0	0	0	0	0	1.00087	--	--	0.487279	--	--	--	--	--	1.07664e+08	0.1965	124735250	0.748
852	SQIFSTASDNQPTVTIK		0	1835.93	2	K	V	17	sp|P11021|BIP_HUMAN	448	464	yes	2.9278e-18	193.06	25	-0.61521	A10;A6;A7;A8;A9;B10;B4;B6;B7;B8;B9	0	0	0	0	0	59142000	86144000	99701000	216440000	0	47650000	0	0	73818000	0	171800000	266220000	12596000	36416000	--	--	--	--	--	0.344249	0.323582	7.91529	5.94354	115356750	0.6022	1.01417e+08	0.9649
853	YRGDQDATMSILDISMMTGFAPDTDDLK		1	3106.39	3	R	Q	28	sp|P01024|CO3_HUMAN	1392	1419	yes	3.5471e-18	136.66	3	0.1739	A1;A5;B2;B3	42168000	0	0	0	43404000	0	0	0	0	0	0	31680000	47474000	0	0	0	0	0	0	--	--	--	--	--	--	--	--	--	42786000	0.0204	39577000	0.2822
854	LLGELLQDNAK	LLGELLQDN(de)AK	0	1212.67	2	K	L	11	sp|P37837|TALDO_HUMAN	259	269	yes	3.8379e-18	179.37	46	-1.0822	A1;A10;A3;A4;A5;A6;A7;A8;A9;B1;B10;B2;B3;B4;B5;B6;B7;B8;B9	182860000	517250000	136470000	108300000	261430000	401590000	221560000	554800000	700120000	32357000	187280000	303550000	265760000	161750000	3884400	787700000	168650000	37277000	189030000	5.65133	2.76191	0.513508	0.669552	67.3025	0.509826	1.31373	14.8832	3.70375	3.42709e+08	0.6112	213723840	1.0513
855	SKIAEYMNHLIDIGVAGFR	SKIAEYMN(de)HLIDIGVAGFR;SKIAEYM(ox)NHLIDIGVAGFR;SKIAEYM(ox)N(de)HLIDIGVAGFR	1	2133.1	2;3;4	R	I	19	sp|P04745|AMY1_HUMAN;sp|P19961|AMY2B_HUMAN;sp|P04746|AMYP_HUMAN	192	210	no	4.3275e-18	178.77	40	-3.0794	A1;A10;A3;A4;A5;A6;A7;A8;A9;B1;B10;B2;B3;B4;B6;B7;B8;B9	104840000	719770000	271730000	99727000	97174000	503980000	1005400000	1089300000	782890000	153510000	685810000	210260000	49274000	275320000	0	327860000	1060400000	27135000	613660000	0.682952	1.04952	5.51467	0.362222	--	1.53718	0.948133	40.1437	1.27577	5.19423e+08	0.7636	3.78137e+08	0.9059
856	TTFDEAMADLHTLSEDSYK	TTFDEAM(ox)ADLHTLSEDSYK	0	2172.95	3	K	D	19	sp|P31947|1433S_HUMAN	196	214	yes	4.3491e-18	137.69	6	-0.28973	A4;A5;B3;B4	0	0	0	164020000	151210000	0	0	0	0	0	0	0	108050000	179580000	0	0	0	0	0	--	--	--	0.913353	--	--	--	--	--	157615000	0.0575	143815000	0.3517
857	KSDLFQEDLYPPTAGPDPALTAEEWLGGR		1	3172.54	3	R	D	29	sp|P31146|COR1A_HUMAN	355	383	yes	4.5909e-18	135.84	4	-3.286	A1;A5;B3;B4	61363000	0	0	0	109020000	0	0	0	0	0	0	0	103640000	46661000	0	0	0	0	0	--	--	--	--	--	--	--	--	--	85191500	0.3956	75150500	0.5361
858	QDIAFAYQR		0	1110.55	2	R	R	9	sp|P07355|ANXA2_HUMAN	69	77	yes	5.2832e-18	183.74	7	-3.2502	A3;A6;A7;A8;A9;B5;B7	0	0	32709000	0	0	84850000	49113000	11300000	32273000	0	0	0	0	0	1469600	0	0	0	0	--	--	--	--	--	--	--	--	--	42049000	0.6524	1469600	--
859	NEALIALLR		0	1011.61	2	R	E	9	sp|P13796|PLSL_HUMAN	245	253	yes	5.541e-18	183.26	12	-0.090647	A1;A4;A5;B2;B3;B4;B5	85656000	0	0	26697000	73369000	0	0	0	0	0	0	116490000	99413000	72489000	3182800	0	0	0	0	--	--	--	0.36829	23.0517	--	--	--	--	6.19073e+07	0.5025	72893700	0.6843
860	AGLLTEEIR		0	1000.56	2	K	S	9	sp|A8K2U0|A2ML1_HUMAN	991	999	yes	7.4263e-18	179.73	43	-0.97868	A1;A10;A3;A4;A5;A6;A7;A8;A9;B1;B10;B2;B3;B4;B5;B6;B7;B8;B9	70698000	60590000	230340000	108780000	138030000	175100000	147170000	143480000	436100000	44823000	36393000	102800000	134070000	231480000	5173500	456440000	187670000	0	34876000	1.57727	1.66488	1.71806	0.469933	26.6802	0.383621	0.784196	--	12.5043	1.6781e+08	0.6737	1.37081e+08	1.0353
861	IMNGEADAMSLDGGFVYIAGK	IMN(de)GEADAMSLDGGFVYIAGK;IM(ox)N(de)GEADAM(ox)SLDGGFVYIAGK;IMN(de)GEADAM(ox)SLDGGFVYIAGK	0	2158.01	2;3	K	C	21	sp|P02787|TRFE_HUMAN	400	420	yes	7.5614e-18	176.33	28	-1.6186	A1;A10;A3;A4;A5;A6;A7;A8;A9;B10;B2;B3;B4;B6;B7;B8;B9	118030000	81395000	22345000	43407000	211650000	207930000	143520000	97567000	126560000	0	91503000	321530000	465260000	147970000	0	367540000	83721000	183410000	172940000	--	0.889534	0.0480269	0.29335	--	0.565734	1.71427	0.531961	0.731815	1.16934e+08	0.5579	229234250	0.6066
862	RQVEKEETNEIQVVNEEPQR		2	2453.21	4	K	D	20	sp|Q8NBJ4|GOLM1_HUMAN	248	267	yes	8.0925e-18	176.42	4	-1.0589	A3;A6;B10;B7	0	0	62378000	0	0	47740000	0	0	0	0	17796000	0	0	0	0	0	13398000	0	0	--	--	--	--	--	--	--	--	--	55059000	0.188	15597000	0.1994
863	AAYLQETGKPLDETLKK		2	1904.03	2;3;4	K	A	17	sp|P04083|ANXA1_HUMAN	82	98	yes	8.8771e-18	204.13	43	-0.84102	A1;A10;A3;A4;A5;A6;A7;A8;A9;B1;B2;B3;B4;B5;B6;B7;B9	88863000	99422000	259010000	100820000	116900000	841010000	980990000	146100000	695250000	134460000	0	80666000	356280000	196250000	28531000	1033600000	283050000	0	35214000	0.660888	--	0.726984	0.513732	4.0973	0.813671	3.46578	--	19.7436	3.69818e+08	0.9806	268506375	1.2302
864	LESEETMVLEAHDAQGDVPVTVTVHDFPGK		0	3249.55	3;4	R	K	30	sp|P01024|CO3_HUMAN	36	65	yes	1.0419e-17	133.23	26	-1.7221	A1;A4;A5;A6;A7;B10;B2;B3;B4;B6;B7;B8;B9	133690000	0	0	40856000	121060000	235230000	623530000	0	0	0	219230000	90559000	154930000	110620000	0	711890000	204550000	147650000	507800000	--	--	--	0.369336	--	0.33043	3.0483	--	--	230873200	0.9967	268403625	0.8265
865	INLGFSNLK	INLGFSN(de)LK	0	1004.57	1;2	R	L	9	sp|Q9UGM3|DMBT1_HUMAN	1804	1812	yes	1.1854e-17	186.54	40	-1.0591	A1;A3;A4;A5;A6;A7;A8;A9;B1;B10;B2;B3;B4;B5;B7;B8;B9	208340000	0	1107500000	343820000	462460000	791250000	55036000	51625000	171300000	885820000	317580000	162790000	201110000	207240000	3476700	0	89827000	49230000	61383000	0.235195	--	5.50694	1.65904	133.017	--	0.612689	1.04865	2.79067	398916375	0.9428	2.19829e+08	1.2193
866	NWMNSLGVNPR	NWMN(de)SLGVNPR	0	1286.62	2	R	V	11	sp|P13796|PLSL_HUMAN	402	412	yes	1.2481e-17	178.94	31	-1.2381	A1;A10;A4;A5;A6;A8;A9;B2;B3;B4;B6;B9	62655000	100360000	0	34396000	84814000	91080000	0	100560000	576390000	0	0	0	28995000	54643000	0	318560000	0	0	32142000	--	--	--	0.629468	--	0.285912	--	--	17.9326	1.50036e+08	1.2629	108585000	1.2934
867	VSQGSKDPAEGDGAQPEETPR		1	2153.98	3	R	D	21	sp|Q14697|GANAB_HUMAN	186	206	yes	1.3153e-17	166.91	32	-3.0613	A1;A10;A3;A4;A5;A6;A7;A8;B1;B10;B2;B3;B4;B6;B7;B8;B9	3312600	2580600	8799700	8506100	7797200	3238600	7177500	6231100	0	3855100	7643400	1690100	0	8346100	0	6055900	18466000	2516700	8263600	0.859277	0.337625	--	1.01917	--	0.534784	0.388687	2.4759	--	5955425	0.4272	7.10461e+06	0.7415
868	ASQSVSSYLAWYQQK		0	1744.84	2	R	P	15	sp|P04433|KV311_HUMAN;sp|A0A0A0MRZ8|KVD11_HUMAN	45	59	yes	1.3831e-17	132.76	1	NAN	A5	0	0	0	0	0	0	0	0	0	0	0	0	0	0	0	0	0	0	0	--	--	--	--	--	--	--	--	--	0	--	0	--
869	AGKEPGLQIWR		1	1253.69	2;3	K	V	11	sp|P06396|GELS_HUMAN;CON__Q3SX14	62	72	yes	1.3945e-17	152.47	112	-0.90484	A1;A10;A3;A4;A5;A6;A7;A8;A9;B1;B10;B2;B3;B4;B6;B7;B8;B9	163070000	174480000	391160000	149800000	256010000	619250000	705380000	236380000	2674700000	109170000	446050000	378550000	321650000	110690000	0	934880000	346540000	103630000	199230000	1.49373	0.391167	1.2161	1.35333	--	0.662384	2.03549	2.281	13.4252	5.96692e+08	1.3492	3.27821e+08	0.7978
870	FGAVFLWDSGSSVGEITGHNK		0	2207.06	3	K	V	21	sp|O75083|WDR1_HUMAN	127	147	yes	1.4099e-17	165.74	2	1.6328	A5;B3	0	0	0	0	43526000	0	0	0	0	0	0	0	44352000	0	0	0	0	0	0	--	--	--	--	--	--	--	--	--	43526000	--	44352000	--
871	VIADNVKDWSK	VIADN(de)VKDWSK	1	1273.67	2;3	K	V	11	sp|P60174|TPIS_HUMAN	187	197	yes	1.456e-17	201.33	113	-1.7619	A1;A10;A3;A5;A6;A7;A8;A9;B10;B2;B3;B4;B6;B7;B8;B9	9319400	271350000	501260000	0	28891000	355680000	284880000	332400000	1709000000	0	280310000	18986000	56266000	21856000	0	1767900000	383520000	90714000	199410000	--	0.968035	8.90875	--	--	0.201188	0.742804	3.66426	8.57028	436597550	1.2364	352370250	1.6651
872	SWVLAVDHLAAVLFPTTLIR		0	2221.26	3	R	S	20	sp|Q6P5S2|LEG1H_HUMAN	239	258	yes	1.4579e-17	175.32	6	-0.17512	A4;A5;B1;B2;B3;B4	0	0	0	29284000	22841000	0	0	0	0	11793000	0	79531000	14197000	45923000	0	0	0	0	0	--	--	--	0.637676	--	--	--	--	--	26062500	0.1748	37861000	0.8409
873	AIGSASEGAQSSLQEVYHK		0	1960.95	3	R	S	19	sp|P28066|PSA5_HUMAN	169	187	yes	1.6495e-17	176.81	13	0.21526	A10;A3;A6;A7;A8;A9;B10;B3;B4;B6;B7;B8;B9	0	0	0	0	0	34340000	43881000	22042000	121900000	0	60886000	0	29698000	37995000	0	206850000	49822000	5956800	27218000	--	--	--	--	--	0.166014	0.880755	3.70031	4.47865	55540750	0.8126	5.97751e+07	1.1236
874	DATNVGDEGGFAPNILENK		0	1959.92	2;3	K	E	19	sp|P06733|ENOA_HUMAN	203	221	yes	2.2019e-17	231.69	16	-2.1264	A1;A4;A5;A8;A9;B2;B3;B4	173310000	0	0	176050000	251910000	0	0	48845000	115450000	0	0	135080000	227530000	251920000	0	0	0	0	0	--	--	--	0.698833	--	--	--	--	--	153113000	0.4951	2.04843e+08	0.3009
875	MHEGDEGPGHHHKPGLGEGTP	M(ox)HEGDEGPGHHHKPGLGEGTP	1	2174.96	2;3;4;5;6	K	-	21	sp|P06702|S10A9_HUMAN	94	114	yes	2.2212e-17	222.75	128	-1.1227	A1;A10;A3;A4;A5;A7;A8;A9;B1;B10;B2;B3;B4;B5;B6;B7;B8;B9	440440000	356740000	9055500	550060000	2662200000	0	1277900	7946100	4855600	72377000	27210000	88492000	411500000	395640000	3496500	14212000	19847000	124380000	80198000	6.08536	13.1106	0.0220061	1.3903	761.39	--	0.0643876	0.0638857	0.0605452	5.04072e+08	1.7868	123735250	1.2318
876	ALDFAVGEYNKASNDMYHSR	ALDFAVGEYN(de)KASNDMYHSR;ALDFAVGEYN(de)KASNDM(ox)YHSR	1	2287.03	3;4	R	A	20	sp|P01034|CYTC_HUMAN	52	71	yes	2.4776e-17	171.68	22	-0.71528	A10;A3;A8;B10;B7;B8;B9	0	354190000	34267000	0	0	0	0	241610000	0	0	588190000	0	0	0	0	0	487210000	374030000	346790000	--	0.602169	--	--	--	--	--	0.645964	--	2.10022e+08	0.7727	449055000	0.247
877	GNEEGDSSGFEHVFSGEVK		0	2009.86	2;3	R	K	19	sp|P21128|ENDOU_HUMAN	274	292	yes	2.5628e-17	145.52	10	-0.97755	A3;A5;A6;A9;B2;B3;B4;B5;B6;B7	0	0	57247000	0	26551000	0	0	0	166660000	0	0	29298000	21548000	28325000	454250	121940000	42463000	0	0	--	--	2.65672	--	58.4502	--	--	--	--	83486000	0.8822	40671375	1.0357
878	LATALQKLEEAEKAADESER		2	2201.12	3;4	R	G	20	sp|P06753|TPM3_HUMAN;sp|P67936|TPM4_HUMAN;sp|P09493|TPM1_HUMAN	107	126	no	2.6705e-17	169.19	9	-1.0697	A10;A8;B10;B6;B7;B8;B9	0	126120000	0	0	0	0	0	173600000	0	0	192360000	0	0	0	0	374380000	257850000	23323000	267940000	--	0.655646	--	--	--	--	--	7.4433	--	149860000	0.224	223170600	0.5797
879	GIVDQSQQAYQEAFEISKK		1	2168.07	2;3	K	E	19	sp|P63104|1433Z_HUMAN	140	158	yes	3.0368e-17	173.36	8	-1.0058	A4;A5;A6;A7;A9;B2;B3;B4	0	0	0	10709000	26390000	164450000	70990000	0	819560000	0	0	16516000	34600000	16087000	0	0	0	0	0	--	--	--	0.665693	--	--	--	--	--	218419800	1.5627	22401000	0.4717
880	LMLLLEVISGER		0	1371.78	2	K	L	12	sp|O43707|ACTN4_HUMAN;sp|Q08043|ACTN3_HUMAN;sp|P12814|ACTN1_HUMAN;sp|P35609|ACTN2_HUMAN	84	95	no	3.1465e-17	160.36	7	-0.16221	A1;A4;A5;A9;B2;B3;B4;B6	2580900	0	0	10093000	35024000	0	0	0	0	0	0	27142000	23193000	17307000	0	32916000	0	0	0	--	--	--	0.583174	--	--	--	--	--	15899300	1.0682	25139500	0.2615
881	ADAAPDEKVLDSGFREIENK		2	2203.08	2;3;4	K	A	20	sp|P01833|PIGR_HUMAN	578	597	yes	3.4642e-17	209.13	33	-3.4086	A1;A10;A3;A6;A7;B10;B7;B8;B9	53408000	1854600000	128080000	0	0	474180000	233850000	0	0	0	828410000	0	0	0	0	0	2644900000	6096100000	2189800000	--	2.23875	--	--	--	--	0.0884154	--	--	548823600	1.3612	2939802500	0.7624
882	GHTELLTVEQALADFAELLR	GHTELLTVEQ(de)ALADFAELLR	0	2225.17	3	R	A	20	sp|Q9UHL4|DPP2_HUMAN	124	143	yes	3.5364e-17	169.28	3	-1.0143	A5;B2;B6	0	0	0	0	9735200	0	0	0	0	0	0	11874000	0	0	0	22319000	0	0	0	--	--	--	--	--	--	--	--	--	9735200	--	17096500	0.432
883	LPVVLANGQIR	LPVVLAN(de)GQIR	0	1178.71	1;2;3	K	A	11	sp|Q9Y6R7|FCGBP_HUMAN	1338	1348	yes	3.5585e-17	178.3	52	-0.71139	A1;A10;A3;A4;A5;A6;A7;A8;A9;B1;B2;B3;B4;B5;B6;B7;B8	424960000	0	1179900000	201660000	801090000	641520000	28022000	65179000	638510000	1253000000	0	366650000	10077000	85832000	7735300	70350000	158400000	124020000	0	0.339154	--	117.088	2.34947	103.563	9.11898	0.176907	0.525552	--	497605125	0.7961	2.59508e+08	1.6078
884	FAAYFQQGDMESNGKYITK	FAAYFQQGDMESN(de)GKYITK	1	2197.01	3	R	S	19	sp|P06744|G6PI_HUMAN;CON__Q3ZBD7	348	366	yes	3.6037e-17	172.97	20	-0.90687	A1;A10;A3;A4;A5;A6;A7;A8;A9;B10;B2;B3;B4;B6;B7;B8;B9	56540000	125750000	86643000	37226000	101150000	114150000	72911000	111070000	369630000	0	85750000	70376000	48078000	56026000	0	333820000	115900000	27214000	105360000	--	1.46647	1.80213	0.664442	--	0.341951	0.629085	4.08136	3.50826	1.19452e+08	0.8214	105315500	0.9201
885	QIQVSWLR	(gl)QIQVSWLR	0	1028.58	1;2	R	E	8	sp|P01871|IGHM_HUMAN	143	150	yes	3.6557e-17	186.94	63	-0.9774	A1;A10;A3;A4;A5;A6;A7;A8;A9;B1;B10;B2;B3;B4;B5;B6;B7;B8;B9	547220000	774890000	1094900000	142330000	331920000	247260000	1053300000	620440000	730710000	464920000	930950000	75366000	460740000	334840000	5107000	302520000	2202600000	470950000	525760000	1.17702	0.832365	2.37639	0.425069	64.9931	0.817334	0.478208	1.31742	1.38982	6.15886e+08	0.546	577375300	1.0832
886	HLSLLTTLSNR		0	1253.71	2;3	K	V	11	sp|P02774|VTDB_HUMAN	208	218	yes	3.7153e-17	140.45	23	-0.87591	A1;A4;A5;A6;A7;A9;B1;B10;B2;B3;B4;B6	52487000	0	0	15764000	27909000	17080000	73930000	0	0	8659700	19905000	49732000	63400000	43463000	0	30847000	0	0	0	6.06106	--	--	0.362699	--	0.553701	--	--	--	37434000	0.6723	3.60011e+07	0.5594
887	AVSNEIVRFPTDQLTPDQER		1	2314.16	2;3	R	S	20	sp|P05164|PERM_HUMAN	229	248	yes	3.8286e-17	213.34	9	-0.88509	A6;A7;A8;A9;B10;B7;B8;B9	0	0	0	0	0	162910000	289480000	184970000	182560000	0	165830000	0	0	0	0	0	376050000	21275000	53033000	--	--	--	--	--	--	0.769791	8.69424	3.44238	204980000	0.279	154047000	1.0417
888	LTWASHEKMHEGDEGPGHHHKPGLGEGTP	LTWASHEKM(ox)HEGDEGPGHHHKPGLGEGTP	2	3127.43	3;4;5	R	-	29	sp|P06702|S10A9_HUMAN	86	114	yes	3.9518e-17	123.35	57	-0.67859	A10;A3;A7;A8;A9;B10;B6;B7	0	45243000	389830000	0	0	0	355500000	78017000	181470000	0	863630000	0	0	0	0	1065500000	318340000	0	0	--	0.052387	--	--	--	--	1.11673	--	--	210012000	0.7487	7.49157e+08	0.5159
889	VHELKEHNGQVTGIDWAPESNR	VHELKEHNGQ(de)VTGIDWAPESNR	1	2515.22	3;4	K	I	22	sp|O15143|ARC1B_HUMAN	45	66	yes	4.4144e-17	129.84	7	-0.88733	A9;B3;B6	0	0	0	0	0	0	0	0	205250000	0	0	0	25365000	0	0	109710000	0	0	0	--	--	--	--	--	--	--	--	--	205250000	--	67537500	0.8831
890	AVEPQLQEEER		0	1326.64	2	R	M	11	sp|P55058|PLTP_HUMAN	252	262	yes	4.4325e-17	177.36	9	0.1176	A6;A7;A9	0	0	0	0	0	282850000	154820000	0	276550000	0	0	0	0	0	0	0	0	0	0	--	--	--	--	--	--	--	--	--	2.38073e+08	0.3031	0	--
891	AMAGLGQPLPQEELDAMIR		0	2039.02	2	R	E	19	sp|Q9NZT1|CALL5_HUMAN	106	124	yes	4.5532e-17	177.81	3	-1.1436	A4;A5;B2;B3	0	0	0	30721000	48644000	0	0	0	0	0	0	19432000	37166000	0	0	0	0	0	0	--	--	--	--	--	--	--	--	--	39682500	0.3194	28299000	0.4431
892	QLNEINYEDHK	(gl)QLNEINYEDHK	0	1401.65	2;3	K	L	11	sp|P00751|CFAB_HUMAN	338	348	yes	6.1494e-17	182.39	29	-1.3485	A1;A3;A4;A5;A6;A7;A8;A9;B10;B2;B3;B4;B5;B6;B8;B9	46260000	0	40622000	7860200	49646000	91539000	71580000	17522000	0	0	65316000	14499000	47917000	36782000	2243400	65773000	0	44308000	61975000	--	--	0.847758	0.213697	22.1298	1.39174	--	0.395459	--	4.64327e+07	0.6239	42351675	0.5581
893	TYMLAFDVNDEKNWGLSVYADKPETTK	TYMLAFDVN(de)DEKNWGLSVYADKPETTK	2	3134.49	3;4	K	E	27	sp|P02763|A1AG1_HUMAN	127	153	yes	7.0922e-17	146.67	4	-3.3671	A1;A5;B3;B4	99428000	0	0	0	236240000	0	0	0	0	0	0	0	89955000	25007000	0	0	0	0	0	--	--	--	--	--	--	--	--	--	167834000	0.5764	57481000	0.799
894	GPLLVQDVVFTDEMAHFDR		0	2188.06	3	R	E	19	sp|P04040|CATA_HUMAN	48	66	yes	8.1792e-17	165.9	6	-0.30156	A1;A4;A5;A9;B2;B3;B4	95320000	0	0	19672000	130970000	0	0	0	48327000	0	0	95547000	142990000	107540000	0	0	0	0	0	--	--	--	0.182927	--	--	--	--	--	73572250	0.6709	115359000	0.2138
895	SKDDQVTVIGAGVTLHEALAAAELLKK		2	2776.53	4	K	E	27	sp|P29401|TKT_HUMAN	498	524	yes	8.5994e-17	107.45	1	0.019135	B6	0	0	0	0	0	0	0	0	0	0	0	0	0	0	0	343870000	0	0	0	--	--	--	--	--	--	--	--	--	0	--	343870000	--
896	AQMVQEDLEKTR		1	1446.71	2;3	K	A	12	sp|P26038|MOES_HUMAN	449	460	yes	8.6012e-17	157.24	14	-0.38508	A10;A8;B10;B6;B7;B9	0	22802000	0	0	0	0	0	21434000	0	0	30706000	0	0	0	0	33267000	39082000	0	36386000	--	0.742591	--	--	--	--	--	--	--	22118000	0.0437	34860250	0.1047
897	IVTMDSNFVPVNDKYSMVELQDPNSNR	IVTMDSN(de)FVPVNDKYSMVELQDPNSNR	1	3111.46	3	R	I	27	sp|A8K2U0|A2ML1_HUMAN	141	167	yes	8.9436e-17	143.44	12	-3.5486	A10;A4;A8;A9;B2;B4;B6;B7	0	108400000	0	38363000	0	0	0	178940000	146340000	0	0	23711000	0	43095000	0	174920000	124660000	0	0	--	--	--	0.890196	--	--	--	--	--	118010750	0.512	91596500	0.7719
898	YSLTYIYTGLSK		0	1407.73	1;2	R	H	12	sp|P25311|ZA2G_HUMAN	28	39	yes	9.3793e-17	179.42	87	-1.1058	A1;A10;A3;A4;A5;A6;A7;A8;A9;B1;B10;B2;B3;B4;B5;B6;B7;B8;B9	1717400000	477770000	1463900000	2207700000	1897500000	1179800000	462240000	818880000	1369600000	2510200000	1002200000	2227000000	1708700000	1836400000	8265300	1655000000	1412800000	84593000	321340000	0.684169	0.476721	0.856733	1.20219	229.574	0.71287	0.32718	9.68023	4.26215	1288310000	0.4761	1276649830	0.6959
899	AAPSVTLFPPSSEELQANK		0	1985.01	2;3	K	A	19	sp|P0DOY2|IGLC2_HUMAN;sp|P0DOY3|IGLC3_HUMAN;sp|P0CF74|IGLC6_HUMAN;sp|A0M8Q6|IGLC7_HUMAN	5	23	no	9.5903e-17	175.88	530	-3.7547	A1;A10;A3;A4;A5;A6;A7;A8;A9;B1;B10;B2;B3;B4;B5;B6;B7;B8;B9	1175800000	5750300000	4858700000	1446100000	1605800000	6819400000	4426800000	4203400000	10323000000	933450000	6065300000	938820000	1464400000	2564000000	3471300	5180600000	3664200000	2578300000	2014800000	1.25963	0.948065	3.31788	0.564002	462.593	1.31633	1.20812	1.6303	5.12359	4.51214e+09	0.6547	2540734130	0.7614
900	EFHTTGLAWSK		0	1275.62	2;3	K	T	11	sp|Q01518|CAP1_HUMAN	199	209	yes	9.6543e-17	205.83	21	-1.4158	A1;A10;A3;A4;A7;A8;A9;B1;B2;B3;B4;B5;B6;B8;B9	34717000	17265000	30405000	11777000	0	0	29932000	12638000	297430000	8503800	0	43542000	63676000	29231000	1309000	224290000	0	3332900	20606000	4.08253	--	0.477495	0.402894	--	--	--	3.79189	14.4341	6.20234e+07	1.6802	4.93113e+07	1.4975
901	SLMFMQWGQLLDHDLDFTPEPAAR		0	2817.33	3	R	A	24	sp|P05164|PERM_HUMAN	249	272	yes	9.7402e-17	161.1	2	-0.073426	A5;B2;B3;B4	0	0	0	0	100190000	0	0	0	0	0	0	76480000	116450000	71549000	0	0	0	0	0	--	--	--	--	--	--	--	--	--	100190000	--	8.81597e+07	0.2793
902	KLISEVDSDGDGEISFQEFLTAAK		1	2598.27	3	R	K	24	sp|Q9NZT1|CALL5_HUMAN	51	74	yes	1.0273e-16	159.73	3	-0.53635	A3;A5;B3	0	0	41895000	0	85297000	0	0	0	0	0	0	0	42595000	0	0	0	0	0	0	--	--	0.983566	--	--	--	--	--	--	63596000	0.4826	42595000	--
903	LMIEMDGTENK	LMIEM(ox)DGTENK	0	1279.58	2	K	S	11	sp|P06733|ENOA_HUMAN	93	103	yes	1.0382e-16	174.41	47	-1.1349	A1;A10;A3;A4;A5;A6;A7;A8;A9;B1;B10;B2;B3;B4;B5;B6;B7;B8;B9	140220000	62155000	223830000	117570000	161580000	106970000	142250000	172360000	231710000	52084000	137260000	79912000	140330000	236720000	882810	225840000	216110000	9955700	54209000	2.69219	0.452827	1.59503	0.496663	183.029	0.473654	0.65823	17.3127	4.27438	1.50961e+08	0.3592	115330351	0.7723
904	AVLDVFEEGTEASAATAVK		0	1906.95	2;3	K	I	19	sp|P01011|AACT_HUMAN	361	379	yes	1.0879e-16	208.97	12	-2.1734	A3;A5;A6;A7;A8;B10;B6;B7;B8;B9	0	0	65881000	0	16907000	171250000	109990000	120200000	0	0	179560000	0	0	0	0	121230000	0	227930000	230900000	--	--	--	--	--	1.4126	--	0.527355	--	96845600	0.6022	189905000	0.2711
905	TEREQFVEFR		1	1339.65	2;3	K	D	10	sp|O43852|CALU_HUMAN	232	241	yes	1.1598e-16	159.83	17	-0.9502	A10;A3;A6;A7;A8;A9;B10;B7;B8;B9	0	19062000	80896000	0	0	46735000	50544000	24811000	0	0	104920000	0	0	0	0	0	144700000	11901000	20270000	--	0.181681	--	--	--	--	0.349302	2.08478	--	44409600	0.5517	70447750	0.9217
906	FPFIGEDDNDDGHPLHPSLNIPYGIR	FPFIGEDDN(de)DDGHPLHPSLNIPYGIR	0	2934.39	3;4	R	N	26	sp|Q6MZM9|PRR27_HUMAN	20	45	yes	1.2902e-16	146.5	4	-0.16629	B1	0	0	0	0	0	0	0	0	0	348520000	0	0	0	0	0	0	0	0	0	--	--	--	--	--	--	--	--	--	0	--	348520000	--
907	GLSTESILIPR		0	1184.68	2;3	R	Q	11	sp|P31025|LCN1_HUMAN;sp|Q5VSP4|LC1L1_HUMAN	156	166	yes	1.3337e-16	172.94	392	-0.79813	A1;A10;A3;A4;A5;A6;A7;A8;A9;B1;B10;B2;B3;B4;B5;B6;B7;B8;B9	5016200000	25140000000	6721200000	7439000000	4975300000	62784000000	38524000000	20639000000	17408000000	6408400000	18082000000	9773600000	8307300000	4240200000	97642000	27072000000	25488000000	5889500000	15138000000	0.782754	1.39033	0.809072	1.7544	50.9545	2.31915	1.51146	3.50437	1.14995	2.09607e+10	0.9213	12049664200	0.7551
908	LQDQQVPYAVK		0	1287.68	2	R	G	11	sp|Q15782|CH3L2_HUMAN	319	329	yes	1.4031e-16	172.59	24	-0.42616	A10;A3;A4;A5;A6;A7;A8;A9;B1;B10;B2;B3;B4;B6;B7;B8	0	21407000	223600000	29848000	49413000	97450000	0	71277000	123050000	51437000	106140000	33411000	29445000	88423000	0	137520000	74603000	31459000	0	--	0.201686	7.59382	0.337559	--	0.708624	--	2.26571	--	8.80064e+07	0.7939	69054750	0.5749
909	VTITADESTSTAYMELSSLR		0	2174.04	2	R	S	20	sp|A0A0B4J2H0|HV69D_HUMAN	87	106	yes	1.4225e-16	230.69	1	-0.088389	B3	0	0	0	0	0	0	0	0	0	0	0	0	38458000	0	0	0	0	0	0	--	--	--	--	--	--	--	--	--	0	--	38458000	--
910	SSALQWLTPEQTSGK		0	1631.82	2	K	E	15	sp|P09960|LKHA4_HUMAN	113	127	yes	1.4561e-16	216.06	6	-0.55652	A1;A4;A5;B2;B3;B4	31697000	0	0	26312000	59539000	0	0	0	0	0	0	45197000	49693000	42995000	0	0	0	0	0	--	--	--	0.611978	--	--	--	--	--	3.91827e+07	0.4551	4.59617e+07	0.0743
911	TVQIAAVVDVIR		0	1282.76	1;2;3	R	E	12	sp|P12273|PIP_HUMAN	107	118	yes	1.6601e-16	153.12	537	-0.73886	A1;A10;A3;A4;A5;A6;A7;A9;B1;B10;B2;B3;B4;B5;B6;B7;B8;B9	4054700000	854210000	5630100000	7452000000	2960300000	2092200000	1164800000	0	6701200000	8384800000	3247200000	1780900000	4681500000	2045300000	55290000	1697800000	4676000000	119940000	1074600000	0.483577	0.26306	1.20263	3.64348	53.5413	1.2323	0.249102	--	6.23599	3863688750	0.6517	2776333000	0.9219
912	AENGKLVINGNPITIFQER	AEN(de)GKLVIN(de)GNPITIFQER	1	2112.13	2;3	K	D	19	sp|P04406|G3P_HUMAN	62	80	yes	1.7076e-16	167.92	13	-0.36417	A1;A4;A5;B1;B2;B3;B4	110630000	0	0	85753000	218620000	0	0	0	0	17954000	0	17044000	161120000	102310000	0	0	0	0	0	6.16186	--	--	0.838168	--	--	--	--	--	1.38334e+08	0.5106	74607000	0.9406
913	TEDTIFLR		0	993.513	2	K	E	8	sp|P02763|A1AG1_HUMAN;sp|P19652|A1AG2_HUMAN	74	81	no	1.7955e-16	186.43	14	-0.64134	A1;A4;A5;A6;B1;B10;B2;B3;B4	68436000	0	0	14080000	74995000	26402000	0	0	0	7269100	33991000	34478000	35574000	24246000	0	0	0	0	0	9.41465	--	--	0.580714	--	--	--	--	--	45978250	0.6581	27111620	0.4423
914	VGEFSGANKEKLEATINELV	VGEFSGANKEKLEATIN(de)ELV	2	2147.11	2;3	K	-	20	sp|P10599|THIO_HUMAN	86	105	yes	1.8097e-16	225.33	20	-0.54425	A1;A10;A3;A6;A7;A8;A9;B10;B6;B7;B8;B9	10542000	398410000	170040000	0	0	118510000	154830000	1012600000	794560000	0	90426000	0	0	0	0	729670000	776190000	14811000	523930000	--	4.40592	--	--	--	0.162416	0.199474	68.3681	1.51654	3.79927e+08	1.0034	427005400	0.833
915	NFSDNQLQEGK		0	1278.58	2	R	N	11	sp|P37802|TAGL2_HUMAN	161	171	yes	1.8305e-16	170.47	8	-0.88721	A10;A8;B1;B2;B3;B7;B8;B9	0	20864000	0	0	0	0	0	16055000	0	3126700	0	3575500	5520900	0	0	0	11895000	8935000	34912000	--	--	--	--	--	--	--	1.79687	--	18459500	0.1842	1.13275e+07	1.0618
916	DITSDTSGDFR		0	1212.53	2	K	N	11	sp|P04083|ANXA1_HUMAN	167	177	yes	2.0385e-16	169.44	43	-0.78849	A1;A10;A3;A4;A5;A6;A7;A8;A9;B1;B10;B2;B3;B4;B5;B6;B7	43839000	13786000	87130000	41523000	45657000	356650000	218580000	42413000	303980000	50435000	42576000	16775000	115300000	63047000	27379000	278340000	75881000	0	0	0.869218	0.323797	0.755681	0.658604	1.66759	1.28135	2.88056	--	--	1.28173e+08	1.0129	83716625	1.0077
917	IWHHTFYNELR	IWHHTFYN(de)ELR	0	1514.74	2;3;4	K	V	11	sp|P63261|ACTG_HUMAN;sp|P60709|ACTB_HUMAN;sp|Q9BYX7|ACTBM_HUMAN;sp|P68133|ACTS_HUMAN;sp|P68032|ACTC_HUMAN;sp|Q6S8J3|POTEE_HUMAN;sp|A5A3E0|POTEF_HUMAN;sp|P0CG38|POTEI_HUMAN;sp|P0CG39|POTEJ_HUMAN	85	95	no	2.1093e-16	174.86	152	-1.6065	A1;A10;A3;A4;A5;A6;A7;A8;A9;B1;B10;B2;B3;B4;B5;B6;B7;B9	599720000	37343000	408230000	466410000	634480000	652070000	134220000	122440000	3753900000	256610000	189130000	236120000	892240000	548230000	6433600	1166200000	191580000	0	71646000	2.33709	0.197446	0.457534	0.850756	98.6197	0.559141	0.700595	--	52.3951	7.56535e+08	1.5177	395354400	0.9995
918	DADLTDTAQTR		0	1205.55	2	K	A	11	sp|Q13630|FCL_HUMAN	45	55	yes	2.1616e-16	168.83	14	-0.69943	A10;A3;A8;A9;B10;B6;B7;B8;B9	0	1710500	3908700	0	0	0	0	6423100	1030100	0	5899900	0	0	0	0	10375000	5403100	1293200	7660100	--	0.28992	--	--	--	--	--	4.96683	0.134476	3268100	0.7453	6126260	0.5434
919	AGLEDLQVAFR		0	1217.64	2	R	A	11	sp|Q9NZT1|CALL5_HUMAN	78	88	yes	2.1678e-16	168.8	14	-0.18862	A1;A10;A4;A5;B1;B10;B2;B3;B4;B5;B6;B7;B8;B9	0	63463000	0	48265000	99265000	0	0	0	0	33966000	41933000	57052000	50649000	59893000	358120	178850000	79003000	28940000	46856000	--	1.51344	--	0.805854	277.184	--	--	--	--	70331000	0.3723	57750012	0.821
920	FTLTEKLEHR		1	1272.68	3;4	K	S	10	sp|P19021|AMD_HUMAN	806	815	yes	2.2647e-16	142	16	-0.2142	A10;A3;A7;A8;B10;B6;B7;B8;B9	0	43538000	60539000	0	0	0	23194000	29768000	0	0	72244000	0	0	0	0	121890000	56736000	46991000	41403000	--	0.602652	--	--	--	--	0.408806	0.633483	--	39259750	0.4209	67852800	0.4774
921	SLVKPITQLLGR		1	1323.82	3	R	T	12	sp|P11215|ITAM_HUMAN	213	224	yes	2.2752e-16	178.1	4	-0.15343	A1;A4;A5;B3	13195000	0	0	6352700	14605000	0	0	0	0	0	0	0	34402000	0	0	0	0	0	0	--	--	--	--	--	--	--	--	--	1.13842e+07	0.3877	34402000	--
922	EHVAHLLFLR		0	1233.7	2;3;4	R	D	10	sp|P19652|A1AG2_HUMAN	114	123	yes	2.2997e-16	195.81	73	-1.0231	A1;A10;A3;A5;A6;A7;A8;A9;B10;B2;B3;B4;B6;B7;B8;B9	67560000	12731000	207740000	0	51702000	223400000	64121000	63756000	143300000	0	318140000	55256000	52222000	34877000	0	115210000	32292000	39265000	192130000	--	0.040017	3.97802	--	--	1.93907	1.98566	1.62374	0.745849	104288750	0.7442	104924000	0.9727
923	AVFPSIVGRPR		1	1197.7	2;3	R	H	11	sp|P63261|ACTG_HUMAN;sp|P60709|ACTB_HUMAN;sp|P68133|ACTS_HUMAN;sp|P68032|ACTC_HUMAN;sp|P63267|ACTH_HUMAN;sp|P62736|ACTA_HUMAN;sp|Q6S8J3|POTEE_HUMAN;sp|A5A3E0|POTEF_HUMAN;sp|P0CG38|POTEI_HUMAN	29	39	no	2.4688e-16	171.73	212	-0.85938	A1;A10;A3;A4;A5;A6;A7;A8;A9;B1;B10;B2;B3;B4;B5;B6;B7;B8;B9	1043700000	539340000	1343400000	687110000	967290000	1892400000	1280600000	1335900000	8344600000	319720000	1562900000	276270000	1387100000	1128200000	3800300	3715300000	982040000	1161400000	3751200000	3.26442	0.345089	0.968495	0.609032	254.53	0.509353	1.30402	1.15025	2.22451	1.93715e+09	1.2573	1428793030	0.9212
924	SGNEDEFR	SGN(de)EDEFR	0	952.389	2	R	N	8	sp|P04745|AMY1_HUMAN;sp|P19961|AMY2B_HUMAN;sp|P04746|AMYP_HUMAN	88	95	no	2.586e-16	183.26	182	-1.6471	A1;A10;A3;A4;A5;A6;A7;A8;A9;B1;B10;B2;B3;B4;B6;B7;B8;B9	10941000	51462000	46547000	16881000	4346600	33160000	79813000	58147000	27131000	7250500	40999000	4319400	2185500	5493800	0	21320000	64582000	20411000	56109000	1.509	1.2552	21.2981	3.07274	--	1.55535	1.23584	2.84881	0.483541	3.64921e+07	0.6741	2.47411e+07	0.9552
925	MAEAELVQEGK		0	1203.58	2	R	A	11	sp|P31944|CASPE_HUMAN	213	223	yes	2.6654e-16	166.33	14	-0.61491	A3;A5;A6;A9;B6	0	0	34065000	0	31523000	58363000	0	0	328220000	0	0	0	0	0	0	275140000	0	0	0	--	--	--	--	--	0.212121	--	--	--	113042750	1.2735	275140000	--
926	ITWLYDNTTGK		0	1310.65	2	R	Q	11	sp|Q08188|TGM3_HUMAN	398	408	yes	2.6654e-16	166.33	14	-2.2673	A1;A10;A3;A4;A5;A9;B1;B3;B4;B5	26193000	50682000	0	40454000	36696000	0	0	0	106250000	30973000	0	0	36644000	92362000	1020400	0	0	0	0	0.845672	--	--	0.437994	35.9624	--	--	--	--	52055000	0.6058	40249850	0.9465
927	NYPENTYYSNFISHLANIKYPGQR		1	2888.39	3	K	T	24	sp|P23280|CAH6_HUMAN	170	193	yes	2.8628e-16	152.81	2	-3.1635	A1;A4	37811000	0	0	34048000	0	0	0	0	0	0	0	0	0	0	0	0	0	0	0	--	--	--	--	--	--	--	--	--	35929500	0.0741	0	--
928	TQEPTQQHFSVAQVFLNNYDAENK	TQEPTQQHFSVAQVFLN(de)NYDAENK	0	2807.32	3	R	L	24	sp|P24158|PRTN3_HUMAN	92	115	yes	2.9739e-16	152.07	12	-0.10692	A1;A4;A5;B2;B3;B4	48929000	0	0	20451000	72564000	0	0	0	0	0	0	142980000	116390000	34506000	0	0	0	0	0	--	--	--	0.59268	--	--	--	--	--	4.73147e+07	0.5515	9.79587e+07	0.5772
929	VTLTSEEEAR		0	1133.56	2	K	L	10	sp|P00338|LDHA_HUMAN	306	315	yes	3.0024e-16	175.51	18	-0.45327	A1;A10;A4;A5;A8;A9;B1;B10;B2;B3;B4;B5;B8;B9	2535300	13128000	0	4259000	125930000	0	0	10327000	24978000	13421000	8208500	64769000	43748000	25368000	5547200	0	0	50150000	7266700	0.188905	1.59932	--	0.167889	22.7015	--	--	0.205922	3.43732	3.01929e+07	1.5757	27309800	0.8341
930	FSVLGSGLNR		0	1048.57	2	R	Y	10	sp|A0A0B4J1Y8|LV949_HUMAN	86	95	yes	3.0537e-16	175.44	13	-1.7238	A3;A4;A5;A6;A8;A9;B1;B10;B2;B3;B4;B5;B8	0	0	31073000	73263000	15545000	58556000	0	0	92286000	21159000	137820000	24622000	35784000	21513000	534360	0	0	9068400	0	--	--	0.868349	3.40552	29.0909	--	--	--	--	54144600	0.5739	3.57858e+07	1.2962
931	LHHVSSLAWLDEHTLVTTSHDASVK		0	2782.4	4;5	R	E	25	sp|O75083|WDR1_HUMAN	576	600	yes	3.0677e-16	144.63	5	-0.37974	A1;A4;A5;B3	14076000	0	0	27288000	37019000	0	0	0	0	0	0	0	34895000	0	0	0	0	0	0	--	--	--	--	--	--	--	--	--	2.61277e+07	0.4407	34895000	--
932	GSVSDEEMMELR	GSVSDEEMM(ox)ELR	0	1381.59	2	R	E	12	sp|P13796|PLSL_HUMAN	4	15	yes	3.0678e-16	179.1	40	-0.94148	A1;A10;A3;A4;A5;A6;A7;A8;A9;B1;B10;B2;B3;B4;B5;B6;B7;B9	52933000	60891000	64994000	30685000	67139000	87326000	68638000	152360000	212980000	0	88265000	67101000	87313000	45296000	274540	262290000	28882000	0	31806000	--	0.689866	0.744379	0.677433	244.551	0.332937	2.3765	--	6.69622	8.86607e+07	0.6473	7.64034e+07	1.06
933	STQDTVIALDALSAYWIASHTTEER		0	2777.35	3	R	G	25	sp|P0C0L4|CO4A_HUMAN;sp|P0C0L5|CO4B_HUMAN	1301	1325	no	3.071e-16	146.5	3	-1.1105	A5;B2;B3;B4	0	0	0	0	54852000	0	0	0	0	0	0	37493000	37429000	69699000	0	0	0	0	0	--	--	--	--	--	--	--	--	--	54852000	--	48207000	0.3861
934	FQLFGSPSGQKDLLFKDSAIGFSR		2	2644.36	3;4	K	V	24	sp|P02788|TRFL_HUMAN	305	328	yes	3.5269e-16	153.77	2	-0.67297	A6	0	0	0	0	0	144480000	0	0	0	0	0	0	0	0	0	0	0	0	0	--	--	--	--	--	--	--	--	--	144480000	--	0	--
935	SSPVVIDASTAIDAPSNLR		0	1911.99	2	R	F	19	sp|P02751|FINC_HUMAN	1983	2001	yes	3.5842e-16	205.72	2	-0.0619	A1;B2;B3;B4	15486000	0	0	0	0	0	0	0	0	0	0	7824700	16627000	9177600	0	0	0	0	0	--	--	--	--	--	--	--	--	--	15486000	--	1.12098e+07	0.4228
936	EIPGGALVLVASYDDPGTK		0	1900.98	2;3	K	M	19	sp|Q96BQ1|FAM3D_HUMAN	135	153	yes	3.5886e-16	165.78	6	-0.23523	A4;A5;B1;B2;B3;B4	0	0	0	100890000	114010000	0	0	0	0	83277000	0	88563000	48634000	30905000	0	0	0	0	0	--	--	--	3.26452	--	--	--	--	--	107450000	0.0863	62844750	0.4407
937	VSNRDSGVPDRFSGSGSGTDFTLK	VSN(de)RDSGVPDRFSGSGSGTDFTLK	2	2485.18	3;4	K	I	24	sp|P06310|KV230_HUMAN	76	99	yes	3.6495e-16	137.24	41	-1.5872	A10;A3;A6;A7;A8;A9;B10;B6;B7;B8;B9	0	231800000	84320000	0	0	97279000	121590000	197020000	276310000	0	245680000	0	0	0	0	687880000	614760000	81611000	51265000	--	0.943504	--	--	--	0.141419	0.197785	2.41414	5.38984	1.68053e+08	0.467	336239200	0.8866
938	TLGLYGKDQQEAALVDMVNDGVEDLR	TLGLYGKDQQEAALVDM(ox)VNDGVEDLR	1	2848.39	3	R	C	26	sp|P09211|GSTP1_HUMAN	76	101	yes	3.8428e-16	141	12	-1.5319	A10;A7;A8;A9;B1;B2;B3;B4;B6;B7;B8;B9	0	135540000	0	0	0	0	99686000	441100000	278580000	13073000	0	77093000	49824000	42261000	0	576180000	251530000	28805000	204490000	--	--	--	--	--	--	0.396319	15.3133	1.36232	238726500	0.6513	155407000	1.2283
939	ARFEELNADLFR		1	1479.75	2;3	R	G	12	sp|P11142|HSP7C_HUMAN;sp|P54652|HSP72_HUMAN	300	311	yes	3.9251e-16	177.04	19	-1.69	A1;A10;A3;A4;A5;A6;A7;A8;A9;B10;B2;B3;B4;B6;B7;B8;B9	24690000	122040000	41313000	12702000	39935000	85530000	92815000	112430000	133190000	0	75968000	30584000	25830000	17327000	0	187470000	165880000	29614000	116050000	--	1.60647	1.59942	0.733076	--	0.456233	0.559531	3.79652	1.14769	7.38494e+07	0.6092	81090375	0.8348
940	AGEVQEPELR		0	1126.56	2;3	R	G	10	sp|P25311|ZA2G_HUMAN	242	251	yes	4.1083e-16	174.02	178	-1.5297	A1;A10;A3;A4;A5;A6;A7;A8;A9;B1;B10;B2;B3;B4;B5;B6;B7;B8;B9	1545300000	2868600000	15676000000	4632600000	2992400000	9426000000	6873000000	4236500000	10181000000	3517000000	8062400000	3487600000	2555800000	3442700000	22941000	13414000000	7331300000	2569900000	2140100000	0.43938	0.3558	6.1335	1.34563	130.439	0.702699	0.937487	1.64851	4.75725	6.49238e+09	0.6997	4654374100	0.8357
941	LSPLGEEMRDR	LSPLGEEM(ox)RDR	1	1301.64	2;3	K	A	11	sp|P02647|APOA1_HUMAN	165	175	yes	4.1459e-16	169.09	74	-1.0721	A1;A10;A3;A4;A5;A6;A7;A8;A9;B1;B10;B2;B3;B4;B6;B7;B8;B9	273250000	1061000000	1022200000	90754000	166760000	6116500000	7559000000	748450000	1219300000	59797000	3053200000	407470000	328690000	76972000	0	5858900000	462790000	3881100000	7270200000	4.56963	0.347504	3.10992	1.17905	--	1.04397	16.3335	0.192845	0.167712	2.02858e+09	1.3706	2.37768e+09	1.1631
942	ISNSLILDVK	ISN(de)SLILDVK	0	1100.64	1;2	K	A	10	sp|Q96DR5|BPIA2_HUMAN	104	113	yes	4.4818e-16	177.06	212	-1.6485	A1;A10;A3;A4;A5;A6;A7;A8;A9;B1;B10;B2;B3;B4;B5;B6;B7;B8;B9	4008000000	617040000	6545200000	5800700000	3747800000	3142100000	586550000	1898400000	6664300000	6913500000	1755300000	3146700000	1602500000	2028400000	43425000	1172300000	2325700000	417850000	716210000	0.579735	0.35153	4.08437	2.85974	86.3051	2.68029	0.252204	4.54326	9.30495	3.66779e+09	0.6404	2012188500	0.9722
943	VLNTEANVVR		0	1113.61	2	R	K	10	sp|O00391|QSOX1_HUMAN	218	227	yes	4.6928e-16	173.23	33	-0.36461	A1;A10;A3;A4;A5;A6;A7;A8;B1;B10;B2;B3;B4;B6;B7;B8;B9	4647400	13874000	180900000	30810000	22208000	89131000	105770000	26019000	0	19807000	93982000	12462000	17606000	22138000	0	59542000	201040000	31772000	31109000	0.234634	0.147624	10.2749	1.39172	--	1.49694	0.526114	0.818929	--	59169925	1.0336	5.43842e+07	1.1166
944	LTVAAPPSGGPGFLSIERPDSRPPR		2	2573.37	4	R	V	25	sp|P0C0L4|CO4A_HUMAN;sp|P0C0L5|CO4B_HUMAN	460	484	no	4.8208e-16	141.1	19	-0.69826	A1;A3;A5;A6;A7;A8;A9;B10;B2;B3;B4;B6;B7;B8;B9	27317000	0	85273000	0	69328000	73156000	175630000	101720000	224980000	0	106040000	9862700	52089000	67676000	0	254660000	97424000	46282000	81010000	--	--	1.63706	--	--	0.287269	1.80274	2.19783	2.77719	1.08201e+08	0.6317	8.93805e+07	0.8219
945	ELLALIQLER		0	1196.71	2	R	E	10	sp|Q16610|ECM1_HUMAN	334	343	yes	5.4239e-16	172.25	6	-0.62304	A1;A3;A4;A5;A8;A9;B6	16052000	0	14993000	30864000	57338000	0	0	26441000	50426000	0	0	0	0	0	0	41214000	0	0	0	--	--	--	--	--	--	--	--	--	3.26857e+07	0.5394	41214000	--
946	HIYYITGETK		0	1223.62	2	K	D	10	sp|P07900|HS90A_HUMAN;sp|Q58FG0|HS905_HUMAN	490	499	yes	5.6176e-16	171.99	4	-0.29553	A4;A5;B3;B4	0	0	0	9281800	12672000	0	0	0	0	0	0	0	5313300	13669000	0	0	0	0	0	--	--	--	0.67904	--	--	--	--	--	10976900	0.2184	9491150	0.6225
947	ALNSIIDVYHK	ALN(de)SIIDVYHK	0	1271.69	2;3	K	Y	11	sp|P05109|S10A8_HUMAN	8	18	yes	5.6455e-16	167.97	458	-3.1029	A1;A10;A3;A4;A5;A6;A7;A8;A9;B1;B10;B2;B3;B4;B5;B6;B7;B8;B9	5925100000	1619100000	9022000000	1374500000	11082000000	9813900000	8694300000	6192700000	11772000000	775770000	13278000000	326030000	2998800000	3270300000	125700000	12503000000	4386700000	794250000	1391900000	7.6377	0.121939	3.00854	0.420298	88.1623	0.784924	1.98197	7.79692	8.4575	7.27729e+09	0.5233	3985045000	1.2295
948	RLNPQWDGEK		1	1241.62	2;3	K	L	10	sp|P22079|PERL_HUMAN	399	408	yes	5.9969e-16	179.51	14	-0.37462	A5;B1;B2;B3;B4;B5	0	0	0	0	74758000	0	0	0	0	84100000	0	35574000	4311100	50675000	363910	0	0	0	0	--	--	--	--	205.43	--	--	--	--	74758000	--	35004802	0.9894
949	GEFVTTVQQR		0	1163.59	2	K	G	10	sp|P40925|MDHC_HUMAN	221	230	yes	6.9134e-16	170.24	11	-0.73611	A1;A10;A4;A5;A6;A7;A8;A9;B10;B2;B3;B4;B5;B6;B7;B8;B9	18342000	24933000	0	37672000	47809000	96444000	82760000	50584000	62310000	0	54087000	48539000	39060000	78176000	2237300	278980000	48263000	13052000	42804000	--	0.46098	--	0.481887	21.3691	0.345702	1.71477	3.87557	1.45571	52606750	0.5139	6.72443e+07	1.2262
950	VLLDGVQNPR		0	1109.62	2	K	A	10	sp|P01024|CO3_HUMAN	306	315	yes	7.7874e-16	169.06	43	-0.31628	A1;A10;A3;A4;A5;A6;A7;A8;A9;B1;B10;B2;B3;B4;B5;B6;B7;B8;B9	110820000	16681000	83543000	19980000	47613000	121040000	219440000	30573000	149450000	9405600	112800000	30235000	58364000	0	2735800	208520000	49919000	92237000	121360000	11.7823	0.147881	1.43141	--	17.4037	0.580472	4.39592	0.331461	1.23146	8.87933e+07	0.7692	7.61752e+07	0.8574
951	YLEQQEGQLK		0	1234.62	2	K	H	10	sp|P07476|INVO_HUMAN	285	294	yes	9.6749e-16	166.52	8	-0.39402	A10;A3;A8;A9;B7;B8;B9	0	14448000	18495000	0	0	0	0	24848000	17371000	0	0	0	0	0	0	0	29831000	13622000	17365000	--	--	--	--	--	--	--	1.82411	1.00035	18790500	0.2333	2.02727e+07	0.4186
952	VLDPFTIKPLDR		1	1412.8	2;3	R	K	12	sp|P29401|TKT_HUMAN	531	542	yes	9.7028e-16	166.66	70	-0.67018	A1;A10;A3;A4;A5;A6;A7;A8;A9;B1;B10;B2;B3;B4;B5;B6;B7;B8;B9	418360000	909330000	310130000	224570000	627960000	748450000	617660000	1113000000	1951000000	77056000	750310000	467920000	704550000	334520000	1692800	1954700000	978980000	175860000	706770000	5.4293	1.21194	0.440182	0.67132	370.959	0.382898	0.630922	6.3289	2.76045	768940000	0.6833	615235880	0.9259
953	MDDREDLVYQAK	(ac)M(ox)DDREDLVYQAK;(ac)MDDREDLVYQAK	1	1481.68	2	-	L	12	sp|P62258|1433E_HUMAN	1	12	yes	1.1589e-15	171.92	47	-1.2638	A1;A3;A4;A5;A6;A7;A8;A9;B1;B10;B2;B3;B4;B5;B6;B7;B8;B9	25778000	0	145530000	17291000	44406000	137820000	94754000	135030000	532500000	14760000	120050000	41356000	30212000	35035000	971130	436290000	149680000	11704000	39870000	1.74648	--	4.81696	0.493535	45.7261	0.315891	0.633044	11.5371	13.3559	141638625	1.1735	87992813	1.494
954	MDSTANEVEAVK	MDSTAN(de)EVEAVK;M(ox)DSTANEVEAVK	0	1292.59	2	K	V	12	sp|P07237|PDIA1_HUMAN	425	436	yes	1.1856e-15	177.78	49	-1.6878	A1;A10;A3;A4;A5;A6;A7;A8;A9;B1;B10;B2;B3;B4;B5;B6;B7;B8;B9	24131000	2470700	145150000	53942000	81642000	139130000	206400000	204480000	767190000	23300000	81293000	8995100	56519000	88408000	718730	554850000	86424000	26423000	91841000	1.03567	0.0303925	2.56816	0.610148	113.592	0.250752	2.38823	7.73871	8.35346	1.80504e+08	1.2849	101877183	1.5993
955	RALDFAVGEYNK		1	1381.7	2;3	R	A	12	sp|P01034|CYTC_HUMAN	51	62	yes	1.3348e-15	179.42	118	-0.50732	A1;A10;A3;A4;A5;A6;A7;A8;A9;B1;B10;B2;B3;B4;B5;B6;B7;B8;B9	299070000	231170000	868820000	199830000	104440000	511620000	167870000	215450000	1017800000	273850000	663010000	78140000	124680000	209340000	1217500	497900000	531030000	401010000	449990000	1.09209	0.348667	6.9684	0.954572	85.7823	1.02756	0.316121	0.537268	2.26183	4.01786e+08	0.8198	323016750	0.6766
956	LKVDLGVLQK		1	1111.7	2;3	K	S	10	sp|Q96DR5|BPIA2_HUMAN	58	67	yes	1.3948e-15	199.89	183	-0.37698	A1;A10;A3;A4;A5;A6;A7;A8;A9;B1;B10;B2;B3;B4;B5;B6;B7;B8;B9	1595600000	2023400000	7994300000	2250300000	1382000000	4353200000	1066300000	3776900000	5310100000	4624500000	3041200000	1307300000	748880000	895550000	18800000	1886500000	3167200000	1405400000	1131300000	0.345032	0.665329	10.675	2.51276	73.5106	2.30755	0.33667	2.68742	4.6938	3.30579e+09	0.6908	1822663000	0.7614
957	FYTIEILKVE		1	1253.69	1;2	R	-	10	sp|P12273|PIP_HUMAN	137	146	yes	1.5269e-15	169.09	250	-0.62353	A1;A10;A3;A4;A5;A6;A7;A8;A9;B1;B10;B2;B3;B4;B5;B6;B7;B8;B9	6844900000	5041500000	4325700000	11222000000	8945600000	4527400000	2731700000	5029600000	4187200000	11339000000	4516100000	3897300000	7806100000	4636300000	59811000	3253900000	18251000000	528220000	1567900000	0.60366	1.11634	0.554144	2.42046	149.564	1.39138	0.149674	9.52179	2.67058	5.87284e+09	0.4558	5585563100	1.0004
958	EDLIWELLNQAQEHFGK		0	2069.02	3	K	D	17	sp|P02787|TRFE_HUMAN	279	295	yes	1.5812e-15	177.74	5	-0.29485	A1;A4;A5;B2;B3;B4	14601000	0	0	18214000	40860000	0	0	0	0	0	0	188630000	36534000	59424000	0	0	0	0	0	--	--	--	0.306509	--	--	--	--	--	2.45583e+07	0.5795	9.48627e+07	0.8645
959	YKPESEELTAER		1	1450.69	2;3	K	I	12	sp|P07237|PDIA1_HUMAN	327	338	yes	1.5848e-15	144.92	49	-0.29748	A1;A10;A4;A5;A7;A8;A9;B1;B10;B2;B3;B4;B5;B6;B7;B8;B9	20943000	65187000	0	112890000	160630000	0	11734000	275520000	8861600	57886000	69939000	3520100	129380000	166920000	2715800	29781000	215320000	103210000	303970000	0.361797	0.932055	--	0.676312	59.1465	--	0.0544956	2.66951	0.0291529	93680800	1.0489	108264190	0.9027
960	HTLNQIDEVK	HTLN(de)QIDEVK	0	1195.62	2	K	V	10	sp|P02765|FETUA_HUMAN	58	67	yes	1.7767e-15	169.65	6	-1.1542	A1;A6;A7;B2;B3;B4;B8;B9	0	0	0	0	0	13350000	20064000	0	0	0	0	3391500	68107000	41789000	0	0	0	9318700	18677000	--	--	--	--	--	--	--	--	--	16707000	0.2842	28256640	0.943
961	SHSAHFFEFLTK		0	1449.7	3	R	E	12	sp|P30046|DOPD_HUMAN;sp|A6NHG4|DDTL_HUMAN	76	87	yes	1.9045e-15	149.41	11	-0.38587	A1;A4;A5;A9;B2;B3;B4	30380000	0	0	26436000	43146000	0	0	0	97793000	0	0	49797000	58067000	27370000	0	0	0	0	0	--	--	--	0.965875	--	--	--	--	--	49438750	0.6678	45078000	0.3524
962	TGLELSRDPAGR		1	1270.66	2;3	R	M	12	sp|P55058|PLTP_HUMAN	127	138	yes	2.1134e-15	130.16	67	-0.68329	A1;A10;A3;A4;A5;A6;A7;A8;A9;B1;B10;B2;B3;B4;B5;B6;B7;B8;B9	14723000	59634000	278230000	23845000	30385000	390510000	327970000	120680000	34676000	102930000	410650000	10387000	23151000	25411000	1403100	116650000	553540000	82244000	120590000	0.143039	0.145219	12.0181	0.938373	21.6556	3.34771	0.592496	1.46734	0.287553	1.42295e+08	1.0432	144695610	1.2877
963	MIPGGLSEAKPATPEIQEIVDK	M(ox)IPGGLSEAKPATPEIQEIVDK;(ac)MIPGGLSEAKPATPEIQEIVDK	1	2322.21	2;3	-	V	22	sp|P01040|CYTA_HUMAN	1	22	yes	2.3303e-15	190.24	127	-1.0887	A1;A10;A3;A4;A5;A6;A7;A8;A9;B1;B10;B2;B3;B4;B5;B7;B9	945620000	143240000	1392700000	654390000	872330000	683810000	280110000	610090000	3066100000	407680000	172600000	1601800000	633800000	736750000	1366600	0	162800000	0	76908000	2.31952	0.829896	2.19738	0.888212	638.321	--	1.72058	--	39.8671	9.60932e+08	0.9051	474213075	1.11
964	SLSNVIAHEISHSWTGNLVTNK		0	2406.23	3;4	K	T	22	sp|P09960|LKHA4_HUMAN	289	310	yes	2.4213e-15	153.6	10	-1.0543	A1;A4;A5;B2;B3;B4	73304000	0	0	84328000	84889000	0	0	0	0	0	0	103380000	94216000	99421000	0	0	0	0	0	--	--	--	0.848191	--	--	--	--	--	8.08403e+07	0.0808	9.90057e+07	0.0464
965	LYQPEYQEVSTEEQREEISGK		1	2541.19	3	K	L	21	sp|Q9Y4L1|HYOU1_HUMAN	754	774	yes	2.5216e-15	126.69	10	-1.7604	A1;A3;A5;A6;A8;B1;B6	0	0	45284000	0	20123000	49553000	0	41086000	0	31765000	0	0	0	0	0	0	0	0	0	--	--	--	--	--	--	--	--	--	39011500	0.3347	31765000	--
966	EMNDAAMFYTNR	EMNDAAM(ox)FYTNR;EMN(de)DAAMFYTNR	0	1461.6	2	K	V	12	sp|Q01518|CAP1_HUMAN	156	167	yes	2.6029e-15	175.65	44	-0.71762	A1;A10;A3;A4;A5;A6;A7;A8;A9;B10;B2;B3;B4;B6;B7	40151000	76435000	26696000	16611000	53057000	78367000	103820000	85905000	361180000	0	25497000	53435000	90221000	39786000	0	295710000	33077000	0	0	--	2.9978	0.295896	0.417509	--	0.265013	3.13874	--	--	9.35802e+07	1.1156	89621000	1.155
967	KKFAYGYIEDLK		2	1473.79	2;3;4	K	C	12	sp|P30740|ILEU_HUMAN	202	213	yes	2.6604e-15	208.56	12	-1.5086	A10;A7;A8;A9;B10;B6	0	66540000	0	0	0	0	130970000	123270000	0	0	78487000	0	0	0	0	137370000	0	0	0	--	0.847784	--	--	--	--	--	--	--	1.06927e+08	0.3291	107928500	0.3858
968	QAHHTDKFSSQELILR	(gl)QAHHTDKFSSQELILR	1	1908.98	3;4	R	R	16	sp|Q08188|TGM3_HUMAN	18	33	yes	2.924e-15	178.14	14	-0.80555	A3;A6;A7;A8;A9;B1;B10;B2;B3;B4;B6;B7	0	0	97974000	0	0	131930000	98117000	24121000	539130000	17930000	32242000	8357200	19306000	85672000	0	216670000	40805000	0	0	--	--	5.0748	--	--	0.608898	2.40453	--	--	178254400	1.1531	6.01403e+07	1.2226
969	AVAGNISDPGLQK		0	1268.67	2	K	S	13	sp|P18206|VINC_HUMAN	803	815	yes	2.9579e-15	213.31	25	-0.4371	A1;A10;A3;A4;A5;A6;A7;A8;A9;B10;B2;B3;B4;B5;B6;B7;B8;B9	33318000	52758000	62971000	7754000	19404000	44610000	92253000	54843000	294310000	0	62750000	18868000	22270000	29149000	375490	256030000	69483000	9665900	33461000	--	0.840765	2.82762	0.266013	51.6765	0.174237	1.32771	5.67386	8.79561	7.35801e+07	1.174	5.57836e+07	1.4062
970	QLSFEEFIMLMAR	QLSFEEFIM(ox)LMAR;(gl)QLSFEEFIMLMAR;(gl)QLSFEEFIM(ox)LMAR	0	1613.79	2;3	K	L	13	sp|P06702|S10A9_HUMAN	73	85	yes	2.996e-15	172.8	52	-3.1795	A1;A10;A3;A4;A5;A6;A9;B1;B3;B4;B6	164500000	0	57834000	123360000	3012100000	58549000	0	0	294780000	15294000	0	0	244890000	541720000	0	134830000	0	0	0	10.7559	--	0.236163	0.227719	--	0.434243	--	--	--	618520500	1.9011	234183500	0.9627
971	LPEWAADEPVEK		0	1382.67	2	K	T	12	sp|P30838|AL3A1_HUMAN	78	89	yes	3.0445e-15	174.98	15	-2.3911	A1;A10;A4;A5;A7;A8;A9;B3;B4;B5;B7	10333000	11425000	0	10888000	38125000	0	17096000	45883000	88256000	0	0	0	24927000	70149000	578540	0	17012000	0	0	--	--	--	0.155212	65.8986	--	1.00494	--	--	3.17151e+07	0.9061	28166635	1.0569
972	WLQGSQELPR	WLQ(de)GSQELPR	0	1212.63	1;2;3	R	E	10	sp|P01876|IGHA1_HUMAN;sp|P01877|IGHA2_HUMAN;sp|P0DOX2|IGA2_HUMAN	366	375	no	3.1307e-15	166.07	560	-3.7366	A1;A10;A3;A4;A5;A6;A7;A8;A9;B1;B10;B2;B3;B4;B5;B6;B7;B8;B9	12635000000	17228000000	43940000000	11523000000	12683000000	31794000000	26115000000	20492000000	43547000000	10393000000	33580000000	7484000000	11592000000	17340000000	561880000	33636000000	34595000000	10354000000	10587000000	1.21572	0.513043	3.79055	0.664533	22.5724	0.945237	0.754878	1.97914	4.11325	2.44397e+10	0.5244	17012288000	0.728
973	NYTPQLSEAEVER		0	1534.73	2	R	A	13	sp|P22894|MMP8_HUMAN	119	131	yes	4.0246e-15	177.57	30	-0.74839	A1;A10;A3;A5;A6;A7;A8;A9;B10;B2;B3;B4;B6;B7;B8;B9	45966000	63913000	40559000	0	26770000	97037000	84286000	34759000	138520000	0	124220000	18047000	33804000	17371000	0	168540000	41332000	14197000	60476000	--	0.514515	1.19983	--	--	0.575751	2.03924	2.44833	2.2905	66476250	0.5721	59748375	0.9513
974	KVEAQLQELQVK		1	1411.8	2;3	K	F	12	sp|P35579|MYH9_HUMAN	1249	1260	yes	4.0325e-15	172.13	2	0.064721	B6	0	0	0	0	0	0	0	0	0	0	0	0	0	0	0	81214000	0	0	0	--	--	--	--	--	--	--	--	--	0	--	81214000	--
975	FYGDEEKDKGLQTSQDAR		2	2085.96	3	K	F	18	sp|P27797|CALR_HUMAN	56	73	yes	4.1241e-15	172.2	1	0.65413	A5	0	0	0	0	11458000	0	0	0	0	0	0	0	0	0	0	0	0	0	0	--	--	--	--	--	--	--	--	--	11458000	--	0	--
976	GADFLVTEVENGGSLGSK	GADFLVTEVEN(de)GGSLGSK	0	1778.87	2	K	K	18	sp|P14618|KPYM_HUMAN	189	206	yes	4.2614e-15	178.58	13	-0.27453	A1;A4;A5;A9;B1;B3;B4	53394000	0	0	37677000	70003000	0	0	0	135760000	25669000	0	0	117090000	51880000	0	0	0	0	0	2.0801	--	--	0.726234	--	--	--	--	--	74208500	0.5809	6.48797e+07	0.7256
977	YAASSYLSLTPEQWKSHR		1	2123.04	4	K	S	18	sp|P0DOY2|IGLC2_HUMAN;sp|P0CF74|IGLC6_HUMAN;sp|A0M8Q6|IGLC7_HUMAN;sp|B9A064|IGLL5_HUMAN;sp|P0DOX8|IGL1_HUMAN;sp|P0CG04|IGLC1_HUMAN	66	83	no	4.3877e-15	166.35	2	-0.17643	B2;B3;B4	0	0	0	0	0	0	0	0	0	0	0	8155100	12450000	17431000	0	0	0	0	0	--	--	--	--	--	--	--	--	--	0	--	12678700	0.3661
978	FHQLDIDDLQSIR		0	1598.81	3	R	A	13	sp|P16152|CBR1_HUMAN	59	71	no	4.446e-15	141.38	7	-1.4815	A4;A5;A9;B3;B4;B7;B8	0	0	0	15354000	18453000	0	0	0	49740000	0	0	0	25470000	20556000	0	0	92746000	26468000	0	--	--	--	0.746935	--	--	--	--	--	27849000	0.683	41310000	0.8324
979	ADQLTEEQIAEFK	(ac)ADQLTEEQIAEFK	0	1520.74	2	M	E	13	sp|P0DP25|CALM3_HUMAN;sp|P0DP24|CALM2_HUMAN;sp|P0DP23|CALM1_HUMAN	2	14	yes	4.5379e-15	169.52	2	-1.3408	B4	0	0	0	0	0	0	0	0	0	0	0	0	0	237100000	0	0	0	0	0	--	--	--	--	--	--	--	--	--	0	--	237100000	--
980	YLESLGEEQRKEAER		2	1835.9	3	R	K	15	sp|Q02818|NUCB1_HUMAN	190	204	yes	4.6281e-15	148.72	14	-1.0201	A10;A3;A7;A8;A9;B10;B7;B8;B9	0	33603000	17787000	0	0	0	48953000	19987000	25489000	0	63194000	0	0	0	0	0	124630000	40536000	46233000	--	0.531744	--	--	--	--	0.392787	0.493068	0.551316	29163800	0.4332	68648250	0.5614
981	ILASTQFEPTAAR		0	1403.74	2	R	M	13	sp|Q9NZ08|ERAP1_HUMAN	176	188	yes	4.9768e-15	215.06	19	-0.47066	A1;A10;A4;A5;A7;A8;A9;B1;B10;B2;B3;B4;B5;B6;B7;B8;B9	29192000	25357000	0	35923000	16361000	0	46361000	22714000	57392000	18219000	0	11667000	11587000	18502000	189680	54783000	68432000	11360000	21083000	1.60228	--	--	1.94157	86.2558	--	0.677475	1.99947	2.72219	3.33286e+07	0.4308	2.39803e+07	0.9356
982	KIIIKNFDIPK	KIIIKN(de)FDIPK	2	1327.82	2;3;4	R	S	11	sp|P12273|PIP_HUMAN	34	44	yes	5.2274e-15	169.76	168	-0.93089	A1;A10;A3;A4;A5;A6;A7;A8;A9;B1;B10;B2;B3;B4;B6;B7;B8;B9	96549000	409600000	924530000	191670000	95810000	112460000	233700000	244800000	1185300000	127280000	892530000	40313000	131740000	73826000	0	1099000000	2628500000	1114600000	828710000	0.758556	0.45892	7.01784	2.59624	--	0.102329	0.08891	0.21963	1.4303	3.88269e+08	1.0193	7.70722e+08	1.0794
983	DAGTIAGLNVLR		0	1198.67	2	K	I	12	sp|P11142|HSP7C_HUMAN	160	171	yes	5.4505e-15	171.36	25	-2.1997	A1;A10;A3;A4;A5;A6;A7;A8;A9;B1;B10;B2;B3;B4;B6;B7;B8;B9	42318000	150100000	100360000	48112000	93918000	215080000	144690000	192430000	343560000	20098000	94946000	72325000	90273000	68461000	0	291650000	179740000	51597000	152460000	2.10558	1.5809	1.11174	0.702765	--	0.737459	0.804996	3.72948	2.25344	1.47841e+08	0.6375	1.13506e+08	0.7292
984	ADQLTEEQVTEFK	(ac)ADQLTEEQVTEFK	0	1536.73	2	M	E	13	sp|P27482|CALL3_HUMAN	2	14	yes	5.6236e-15	167.12	13	-1.8631	A1;A4;A5;B1;B2;B3;B4	20389000	0	0	48239000	63041000	0	0	0	0	35973000	0	42810000	36787000	79444000	0	0	0	0	0	0.566786	--	--	0.607208	--	--	--	--	--	4.38897e+07	0.4934	48753500	0.4243
985	GDVSLKDIIDPAFR		1	1544.82	3	K	A	14	sp|Q01459|DIAC_HUMAN	106	119	yes	5.9969e-15	116.63	2	NAN	A4;B2	0	0	0	0	0	0	0	0	0	0	0	0	0	0	0	0	0	0	0	--	--	--	--	--	--	--	--	--	0	--	0	--
986	TQVVAGTNYYIK	TQVVAGTN(de)YYIK	0	1355.71	2	K	V	12	sp|P01040|CYTA_HUMAN	45	56	yes	6.041e-15	170.47	86	-2.3223	A1;A10;A3;A4;A5;A6;A7;A8;A9;B1;B10;B2;B3;B4;B5;B6;B7;B8;B9	484090000	234700000	1421600000	224430000	528020000	1078000000	328350000	422250000	3001300000	166160000	287730000	453480000	239540000	451410000	13909000	208420000	250290000	44606000	224810000	2.9134	0.815695	5.93471	0.497176	37.9625	5.17225	1.31188	9.46622	13.3504	8.58082e+08	1.0479	234035500	0.618
987	TYWELLSGGEPLSQGAGSYVVRNGENLEVR	TYWELLSGGEPLSQGAGSYVVRN(de)GENLEVR	1	3279.62	3	R	W	30	sp|P20061|TCO1_HUMAN	400	429	yes	6.4073e-15	110.01	1	-0.3009	A4	0	0	0	29512000	0	0	0	0	0	0	0	0	0	0	0	0	0	0	0	--	--	--	--	--	--	--	--	--	29512000	--	0	--
988	SEGDQLLIVRPVR		1	1480.84	3	R	S	13	sp|Q86VR7|VS10L_HUMAN	358	370	yes	6.5785e-15	165.66	12	-0.91114	A1;A3;A4;A7;A8;A9;B1;B10;B5;B7;B8	23072000	0	66604000	17105000	0	0	22629000	66907000	52427000	14751000	30309000	0	0	0	808850	0	57680000	10588000	0	1.5641	--	--	--	--	--	0.39232	6.31913	--	4.14573e+07	0.5591	22827370	0.9723
989	SVQVKLGDSWDVK		1	1459.77	2;3	K	L	13	sp|Q96DA0|ZG16B_HUMAN	88	100	yes	6.8751e-15	177.83	25	-0.91881	A3;A6;A7;A8;B10;B7;B9	0	0	712910000	0	0	157110000	217280000	190330000	0	0	524780000	0	0	0	0	0	411690000	0	13784000	--	--	--	--	--	--	0.527776	--	--	319407500	0.8249	3.16751e+08	0.8474
990	LGHPDTLNQGEFKELVRK	LGHPDTLN(de)QGEFKELVRK	2	2080.11	2;3;4;5	K	D	18	sp|P06702|S10A9_HUMAN	26	43	yes	7.3113e-15	166.52	87	-1.1312	A10;A3;A6;A7;A8;A9;B10;B6;B7;B8;B9	0	164220000	286960000	0	0	322080000	773050000	391380000	864220000	0	1887100000	0	0	0	0	3217200000	994490000	136270000	152350000	--	0.0870224	--	--	--	0.100112	0.777333	2.87209	5.6726	466985000	0.6074	1277482000	1.0193
991	MLSGFSPMEGTNQLLLQQPLVK		0	2430.27	2;3	K	K	22	sp|A8K2U0|A2ML1_HUMAN	1371	1392	yes	7.6544e-15	193.96	5	-1.0785	A4;A5;B2;B3;B4	0	0	0	30661000	37210000	0	0	0	0	0	0	86562000	55395000	135760000	0	0	0	0	0	--	--	--	0.225847	--	--	--	--	--	33935500	0.1365	9.25723e+07	0.4377
992	VYDPKNEEDDMREMEEER		2	2312.95	3;4	K	L	18	sp|Q02818|NUCB1_HUMAN	276	293	yes	7.7113e-15	165.8	24	-0.58634	A1;A10;A3;A4;A5;A6;A7;A8;B1;B10;B3;B4;B7;B8;B9	13694000	20536000	245020000	25284000	16028000	69440000	57584000	122290000	0	22262000	172190000	0	17850000	13677000	0	0	330270000	18692000	31811000	0.615129	0.119264	13.7266	1.84865	--	--	0.174354	6.54237	--	71234500	1.1135	8.66789e+07	1.4011
993	TEGDGVYTLNDK	TEGDGVYTLN(de)DK	0	1310.6	2	R	K	12	sp|P00738|HPT_HUMAN;sp|P00739|HPTR_HUMAN	60	71	no	7.8872e-15	167.69	19	-1.3301	A1;A3;A4;A5;A6;A7;A9;B3;B8;B9	18387000	0	0	0	11236000	87256000	49624000	0	44440000	0	0	0	18421000	0	0	0	0	75178000	26895000	--	--	--	--	--	--	--	--	1.65235	42188600	0.7127	4.01647e+07	0.7623
994	PATPEIQEIVDK		0	1338.7	2	K	V	12	sp|P01040|CYTA_HUMAN	11	22	yes	8.2712e-15	167.12	15	-1.8845	A1;A4;A5;B1;B2;B3;B4;B5	74959000	0	0	47783000	77380000	0	0	0	0	29829000	0	102530000	52013000	85627000	487150	0	0	0	0	2.51296	--	--	0.558037	158.842	--	--	--	--	6.67073e+07	0.2464	54097230	0.7626
995	QLNYKHYDGSYSTFGER	(gl)QLNYKHYDGSYSTFGER;QLN(de)YKHYDGSYSTFGER	1	2063.93	2;3	R	Y	17	sp|P01023|A2MG_HUMAN	1015	1031	yes	8.5244e-15	208.27	2	0.080979	B8;B9	0	0	0	0	0	0	0	0	0	0	0	0	0	0	0	0	0	11745000	16997000	--	--	--	--	--	--	--	--	--	0	--	14371000	0.2584
996	ALHFAISEYNKATK	ALHFAISEYN(de)KATK	1	1591.84	2;3;4	R	D	14	sp|P01037|CYTN_HUMAN	47	60	yes	8.8546e-15	156.52	81	-2.1984	A1;A10;A3;A4;A5;A6;A7;A9;B1;B10;B2;B3;B4;B6;B7;B8;B9	271490000	4959700	138660000	108500000	84051000	41722000	44073000	0	859580000	117580000	230520000	91416000	85217000	115730000	0	1230500000	308930000	63289000	70901000	2.30898	0.0215153	1.62714	0.937527	--	0.0339065	0.142663	--	12.1237	1.94129e+08	1.4477	2.5712e+08	1.4549
997	LQSLFDSPDFSK		0	1382.67	2	K	I	12	sp|P36955|PEDF_HUMAN	334	345	yes	8.8876e-15	166.19	5	0.13463	A1;A4;A5;B3;B4	23032000	0	0	0	0	0	0	0	0	0	0	0	22323000	6566800	0	0	0	0	0	--	--	--	--	--	--	--	--	--	23032000	--	14444900	0.7713
998	SDKPDMAEIEKFDK	(ac)SDKPDM(ox)AEIEKFDK;(ac)SDKPDMAEIEKFDK	2	1651.78	2;3	M	S	14	sp|P62328|TYB4_HUMAN	2	15	yes	9.0948e-15	175.21	60	-1.4297	A1;A10;A3;A6;A7;A8;B1;B10;B7;B8;B9	125420000	1389100000	136420000	0	0	489150000	938800000	379340000	0	27512000	1773900000	0	0	0	0	0	294530000	30143000	1532700000	4.55874	0.783077	--	--	--	--	3.18745	12.5847	--	5.76372e+08	0.8624	731757000	1.165
999	FLSEIESDSLALR		0	1478.76	2	K	Q	13	sp|P52790|HXK3_HUMAN	792	804	yes	9.2648e-15	174.98	3	0.16748	A1;A5;B3;B4;B6	16724000	0	0	0	21340000	0	0	0	0	0	0	0	28770000	18127000	0	21035000	0	0	0	--	--	--	--	--	--	--	--	--	19032000	0.1715	22644000	0.2429
1000	YGINTTDIFQTVDLWEGK		0	2099.02	2	R	N	18	sp|P37802|TAGL2_HUMAN	103	120	yes	9.2842e-15	174.39	4	0.41605	A4;A5;A9;B1;B2;B4	0	0	0	33928000	33443000	0	0	0	49372000	36539000	0	77274000	0	68526000	0	0	0	0	0	--	--	--	0.495111	--	--	--	--	--	3.89143e+07	0.2328	6.07797e+07	0.3528
1001	SSEMPELTSMHTLLLR	SSEM(ox)PELTSMHTLLLR	0	1843.92	2;3	R	E	16	sp|P05164|PERM_HUMAN	406	421	yes	9.3938e-15	159.64	19	-1.5874	A1;A4;A5;A6;A7;A8;A9;B1;B10;B2;B3;B4;B7	27435000	0	0	75659000	135660000	113920000	141330000	164860000	105230000	25511000	60285000	47783000	259080000	60711000	0	0	165560000	0	0	1.07542	--	--	1.24622	--	--	0.853648	--	--	1.09156e+08	0.4211	103155000	0.8772
1002	TLEEEAKTHEAQIQEMR		1	2041.97	3	K	Q	17	sp|P35579|MYH9_HUMAN	1175	1191	yes	9.8572e-15	168.41	3	-0.46915	A6;B6	0	0	0	0	0	0	0	0	0	0	0	0	0	0	0	118630000	0	0	0	--	--	--	--	--	--	--	--	--	0	--	118630000	--
1003	SQVVAGTNYFIK	SQVVAGTN(de)YFIK	0	1325.7	2	K	V	12	sp|P04080|CYTB_HUMAN	45	56	yes	1.0023e-14	173.32	189	-1.563	A1;A10;A3;A4;A5;A6;A7;A8;A9;B1;B10;B2;B3;B4;B5;B6;B7;B8;B9	1412200000	479340000	1321400000	1991500000	2219100000	706480000	514260000	1906900000	5809400000	802380000	228270000	2348000000	1293400000	2294100000	39766000	1975000000	1201300000	96620000	416440000	1.76001	2.09988	1.02165	0.868096	55.804	0.357711	0.428086	19.7361	13.9501	1.81784e+09	0.897	1069527600	0.8383
1004	ELDRDTVFALVNYIFFK	ELDRDTVFALVN(de)YIFFK	1	2089.09	2;3	K	G	17	sp|P01009|A1AT_HUMAN	199	215	yes	1.1174e-14	166.92	9	-1.5521	A4;A5;B2;B3;B4	0	0	0	3494700	66379000	0	0	0	0	0	0	75387000	37514000	66373000	0	0	0	0	0	--	--	--	0.0526524	--	--	--	--	--	34936850	1.2728	59758000	0.3311
1005	ASMHPVTAMLVGK		0	1340.69	2;3	K	D	13	sp|P09960|LKHA4_HUMAN	594	606	yes	1.1977e-14	143.4	9	-1.9336	A1;A10;A4;B2;B3;B4;B6;B9	29152000	11349000	0	49895000	0	0	0	0	0	0	0	33134000	21763000	61088000	0	147160000	0	0	0	--	--	--	0.816773	--	--	--	--	--	30132000	0.6402	65786250	0.862
1006	LNFSHGTHEYHAETIK	LN(de)FSHGTHEYHAETIK	0	1882.9	3;4;5	R	N	16	sp|P14618|KPYM_HUMAN	74	89	yes	1.2226e-14	174.59	70	-1.2079	A1;A10;A3;A4;A5;A6;A7;A8;A9;B1;B10;B2;B3;B4;B6;B7;B8;B9	117430000	21936000	253020000	131430000	174850000	122500000	151340000	159310000	243330000	50785000	308370000	23356000	137570000	110580000	0	310960000	353630000	52013000	184450000	2.3123	0.0711353	1.83921	1.18855	--	0.393941	0.427961	3.06289	1.31922	152794000	0.4542	1.7019e+08	0.7408
1007	FSGSGAGTDFTLK		0	1286.61	2	R	I	13	sp|A0A075B6R9|KVD24_HUMAN;sp|A0A0C4DH68|KV224_HUMAN	87	99	no	1.2858e-14	160.36	49	-1.8345	A1;A10;A3;A4;A5;A6;A7;A8;A9;B1;B10;B2;B3;B4;B5;B6;B7;B8;B9	414690000	126650000	665090000	293150000	317510000	311700000	626930000	306920000	1237700000	319280000	272210000	81069000	1413200000	579550000	2963200	192850000	312330000	0	97168000	1.29883	0.465266	0.470627	0.505823	107.151	1.61628	2.00727	--	12.7377	4.77816e+08	0.6936	3.63402e+08	1.1801
1008	NMVNFR	NM(ox)VNFR;N(de)M(ox)VNFR;N(de)MVN(de)FR;N(de)MVNFR;N(de)M(ox)VN(de)FR	0	779.375	1;2	R	N	6	sp|P04745|AMY1_HUMAN;sp|P19961|AMY2B_HUMAN	408	413	no	1.4103e-14	199.27	592	-1.3812	A1;A10;A3;A4;A5;A6;A7;A8;A9;B1;B10;B2;B3;B4;B5;B6;B7;B8;B9	7937400000	12935000000	6310100000	10714000000	9972000000	14883000000	27224000000	19156000000	17917000000	9098600000	19584000000	10703000000	2255900000	14123000000	429010000	9851100000	25411000000	12754000000	22043000000	0.872376	0.660488	2.79715	0.758621	23.2442	1.5108	1.07135	1.50196	0.81282	14116500000	0.4628	12625261000	0.6375
1009	FKVEESYDLKDTLR		2	1741.89	2;3;4	R	T	14	sp|P29508|SPB3_HUMAN	287	300	yes	1.4422e-14	151.72	70	-0.65055	A1;A10;A3;A4;A5;A6;A7;A8;A9;B1;B10;B2;B3;B4;B6;B7;B8;B9	31546000	129760000	462900000	11476000	35920000	187330000	256690000	411980000	650320000	9672400	40970000	35272000	38422000	79743000	0	1120100000	558600000	53460000	253930000	3.26144	3.1672	12.0478	0.143912	--	0.167244	0.459524	7.70632	2.56102	2.41991e+08	0.9242	2.43352e+08	1.532
1010	EVWFFGLQYQDTK		0	1659.79	2	R	G	13	sp|P26038|MOES_HUMAN	41	53	yes	1.5104e-14	204.5	4	-1.4302	A1;A4;A5;B3;B4	21761000	0	0	10237000	32843000	0	0	0	0	0	0	0	31495000	19633000	0	0	0	0	0	--	--	--	0.521418	--	--	--	--	--	2.16137e+07	0.523	25564000	0.3281
1011	DPDAQPGGELMLGGTDSK	DPDAQPGGELM(ox)LGGTDSK	0	1786.8	2	R	Y	18	sp|P07339|CATD_HUMAN	236	253	yes	1.5311e-14	205.3	45	-1.1126	A1;A10;A3;A4;A5;A6;A7;A8;A9;B1;B10;B2;B3;B4;B5;B6;B7	40172000	13824000	115830000	108630000	102140000	91711000	35354000	45634000	181710000	88767000	67192000	45453000	49489000	81603000	535020	62629000	77036000	0	0	0.452556	0.205739	2.34052	1.3312	190.909	1.46435	0.458928	--	--	8.16672e+07	0.6449	5.9088e+07	0.4742
1012	MYATIYELKEDK		1	1502.73	2;3	K	S	12	sp|P80188|NGAL_HUMAN	71	82	yes	1.5528e-14	167.67	43	-0.60032	A1;A10;A3;A4;A5;A6;A7;A9;B1;B2;B3;B4;B5;B6	301470000	17906000	190730000	135420000	255290000	269130000	63153000	0	465370000	74221000	0	324680000	440540000	324730000	5696700	98558000	0	0	0	4.06179	--	0.432946	0.417023	44.8137	2.73068	--	--	--	212308625	0.6743	2.11404e+08	0.8249
1013	SDLVNEEATGQFR		0	1464.68	2	K	V	13	sp|P06731|CEAM5_HUMAN	127	139	yes	1.6157e-14	196.7	22	0.041245	A1;A3;A4;A6;A7;A8;A9;B10;B2;B3;B4;B5;B6;B7	36374000	0	54842000	22618000	0	156600000	79865000	83438000	119320000	0	58011000	24805000	44240000	78050000	765570	346770000	78704000	0	0	--	--	1.23965	0.289789	--	0.451596	1.01475	--	--	7.90081e+07	0.5947	9.01922e+07	1.2925
1014	PFIYQEVIDLGGEPIK		0	1816.96	2;3	K	S	16	sp|P04745|AMY1_HUMAN;sp|P19961|AMY2B_HUMAN;sp|P04746|AMYP_HUMAN	243	258	no	1.6361e-14	207.66	20	-0.63872	A1;A4;A5;B1;B2;B3;B4;B5	1387600000	0	0	2887800000	1610400000	0	0	0	0	1888400000	0	1222700000	221870000	2130200000	0	0	0	0	0	0.734802	--	--	1.35565	--	--	--	--	--	1.96193e+09	0.4126	1365792500	0.6251
1015	DGNGNTWLTAFVTK	DGN(de)GNTWLTAFVTK	0	1522.74	2	R	C	14	sp|A8K2U0|A2ML1_HUMAN	1030	1043	yes	1.7163e-14	142.19	2	-0.76057	A4;B4	0	0	0	0	0	0	0	0	0	0	0	0	0	64594000	0	0	0	0	0	--	--	--	--	--	--	--	--	--	0	--	64594000	--
1016	IEEQREKVHENENIGTTEPGEHQEAK		2	3030.43	3;4;5	K	K	26	sp|Q14515|SPRL1_HUMAN	383	408	yes	1.7368e-14	136.64	8	-0.16611	B10;B7;B8;B9	0	0	0	0	0	0	0	0	0	0	8322900	0	0	0	0	0	23127000	12890000	7839100	--	--	--	--	--	--	--	--	--	0	--	13044750	0.544
1017	FWEVISDEHGIDPTGTYHGDSDLQLDR		0	3101.4	4	K	I	27	sp|P07437|TBB5_HUMAN	20	46	yes	1.7381e-14	135.01	3	-3.7623	A1;A4;B3;B4	23905000	0	0	14356000	0	0	0	0	0	0	0	0	34716000	22835000	0	0	0	0	0	--	--	--	0.628684	--	--	--	--	--	19130500	0.353	28775500	0.292
1018	RQSEDSTFYLGER		1	1586.73	2;3	R	T	13	sp|P00450|CERU_HUMAN	720	732	yes	1.7726e-14	168.82	33	-1.0769	A1;A3;A6;A7;A9;B10;B2;B3;B4;B6;B8;B9	16943000	0	77894000	0	0	106350000	130470000	0	44279000	0	97291000	10227000	12453000	9600600	0	45714000	0	91673000	106170000	--	--	6.25504	--	--	2.32642	--	--	0.417058	75187200	0.6088	5.33041e+07	0.8282
1019	LKGEMMDLQHGSLFLR	LKGEMM(ox)DLQHGSLFLR	1	1873.95	3;4	K	T	16	sp|P00338|LDHA_HUMAN	58	73	yes	1.8714e-14	140.22	15	-1.5096	A1;A4;A5;B1;B2;B3;B4	73048000	0	0	27199000	174870000	0	0	0	0	19206000	0	56492000	149070000	86560000	0	0	0	0	0	3.80339	--	--	0.314221	--	--	--	--	--	9.17057e+07	0.8242	77832000	0.7054
1020	VLNNMEIGTSLFDEEGAK		0	1965.94	2	K	I	18	sp|P00558|PGK1_HUMAN	247	264	yes	1.89e-14	169.04	2	-0.77046	A8;A9	0	0	0	0	0	0	0	106440000	64191000	0	0	0	0	0	0	0	0	0	0	--	--	--	--	--	--	--	--	--	85315500	0.3502	0	--
1021	TAEHFQEAMEESK		0	1535.66	2;3	K	T	13	sp|Q9BRK5|CAB45_HUMAN	131	143	yes	1.9105e-14	196.38	10	-0.97391	A4;A8;B10;B7;B8;B9	0	0	0	7743600	0	0	0	30204000	0	0	46889000	0	0	0	0	0	149180000	11566000	41042000	--	--	--	--	--	--	--	2.61145	--	18973800	0.837	62169250	0.9656
1022	GILAADESTGSIAK		0	1331.69	2	K	R	14	sp|P04075|ALDOA_HUMAN	29	42	yes	1.9322e-14	178.08	40	-0.16539	A1;A10;A3;A4;A5;A6;A7;A8;A9;B1;B10;B2;B3;B4;B5;B7;B8;B9	208020000	197140000	253540000	126870000	217190000	349810000	329410000	255190000	1466100000	51435000	316400000	110670000	212700000	289510000	5890500	0	349850000	52683000	179950000	4.04433	0.623072	1.19201	0.438223	36.8712	--	0.941575	4.84388	8.14726	3.78141e+08	1.0937	1.74343e+08	0.7258
1023	QLAEEYLYR	(gl)QLAEEYLYR	0	1183.59	2	R	Y	9	sp|P14780|MMP9_HUMAN	43	51	yes	1.9556e-14	179.21	43	-1.9922	A1;A10;A3;A4;A5;A6;A7;A8;A9;B10;B2;B3;B4;B5;B6;B7;B8;B9	54178000	66139000	0	11759000	57290000	107550000	123600000	86205000	247560000	0	113380000	43139000	99629000	28980000	571130	163260000	68424000	12710000	39635000	--	0.583339	--	0.405763	100.31	0.658765	1.80638	6.78245	6.24599	94285125	0.7518	6.33031e+07	0.8375
1024	EEGLILFDQIPVSSGFSK		0	1965.01	2;3	K	N	18	sp|Q9HC84|MUC5B_HUMAN	5156	5173	yes	1.9618e-14	213.18	10	-1.5901	A1;A4;A5;B1;B2;B3;B4	138470000	0	0	332980000	415750000	0	0	0	0	373180000	0	585800000	156960000	524940000	0	0	0	0	0	0.371054	--	--	0.63432	--	--	--	--	--	2.95733e+08	0.4813	410220000	0.4657
1025	ALGFEAAESSLTK		0	1322.67	2;3	K	D	13	sp|Q8TDL5|BPIB1_HUMAN	453	465	yes	1.982e-14	169.76	66	-1.5619	A1;A10;A3;A4;A5;A6;A7;A8;A9;B1;B10;B2;B3;B4;B5;B6;B7;B8;B9	292910000	124640000	401460000	621330000	221500000	22076000000	3252300000	239430000	1026700000	1692100000	733310000	584440000	1179700000	497560000	214590	750080000	2205700000	79665000	368800000	0.173104	0.169969	0.340307	1.24875	1032.2	29.4315	1.4745	3.00546	2.78389	3.13959e+09	2.2831	809156959	0.8646
1026	VVRDPQGIRAWVAWR		2	1808	4	R	N	15	sp|P61626|LYSC_HUMAN	117	131	yes	1.9953e-14	142.85	1	-0.1022	A6	0	0	0	0	0	74346000	0	0	0	0	0	0	0	0	0	0	0	0	0	--	--	--	--	--	--	--	--	--	74346000	--	0	--
1027	TKPSDEEMLFIYGHYK	TKPSDEEM(ox)LFIYGHYK	1	1956.93	2;3;4	K	Q	16	sp|P07108|ACBP_HUMAN	18	33	yes	2.0018e-14	146.16	113	-2.3142	A1;A10;A3;A4;A5;A6;A7;A8;A9;B1;B10;B2;B3;B4;B5;B6;B7;B9	393460000	238140000	388770000	679000000	722060000	189520000	310300000	1012300000	3022400000	255410000	223200000	951650000	631380000	1138300000	2588200	630870000	339600000	0	160490000	1.5405	1.06694	0.615746	0.596504	278.982	0.300411	0.913722	--	18.8323	7.72883e+08	1.1446	4.81499e+08	0.7934
[truncated: 3,717 more rows]
[truncated: 2 more columns]
